# Supplementary material for: The ICPMS signal as a Poisson process: a review of basic concepts
Source: Royal Society of Chemistry journal article supplement (doi:10.1039/c4ja00319e), 2014-12-15
Supplement: c4ja00319e1.pdf [file c4ja00319e1.pdf]

On the derivations of expressions for  $Var\left(\frac{N^x}{N^y}\right)$  and  $RSD\%\left(\frac{N^x}{N^y}\right)$ :

(i) trivial case of ordinary Poisson distributed signals devoid of excess variance:

$$Var(N^x) = \bar{N}^x; \quad Var(N^y) = \bar{N}^y; \quad Cov(N^x, N^y) = 0$$

↓

$$\begin{aligned} Var\left(\frac{N^x}{N^y}\right) &= \left(\frac{1}{\bar{N}^y}\right)^2 Var(N^x) + \frac{(\bar{N}^x)^2}{(\bar{N}^y)^4} Var(N^y) - 2\left(\frac{1}{\bar{N}^y}\right)\left(\frac{\bar{N}^x}{(\bar{N}^y)^2}\right) Cov(N^x, N^y) = \\ &= \left(\frac{1}{\bar{N}^y}\right)^2 \bar{N}^x + \frac{(\bar{N}^x)^2}{(\bar{N}^y)^4} \bar{N}^y - 0 = \frac{\bar{N}^x}{(\bar{N}^y)^2} \left[1 + \frac{\bar{N}^x}{\bar{N}^y}\right] = \left(\frac{\bar{N}^x}{\bar{N}^y}\right)^2 \left[\frac{1}{\bar{N}^x} + \frac{1}{\bar{N}^y}\right] \end{aligned}$$

(ii) general case of doubly stochastic Poisson distributed signals with an excess variance (assuming that the both isotopes have constant transmission efficiencies):

$$Var(N^x) = \bar{N}^x + p^2 Var(M^x); \quad Var(N^y) = \bar{N}^y + p^2 Var(M^y); \quad Cov(N^x, N^y) = p^x p^y Cov(M^x, M^y);$$

$$\text{Let us introduce Pearson's } \rho(M^x, M^y) = \frac{Cov(M^x, M^y)}{[Var(M^x)Var(M^y)]^{1/2}} \in [-1; +1]$$

↓

$$\begin{aligned} Var\left(\frac{N^x}{N^y}\right) &= \left(\frac{1}{\bar{N}^y}\right)^2 Var(N^x) + \frac{(\bar{N}^x)^2}{(\bar{N}^y)^4} Var(N^y) - 2\left(\frac{1}{\bar{N}^y}\right)\left(\frac{\bar{N}^x}{(\bar{N}^y)^2}\right) Cov(N^x, N^y) = \\ &= \left(\frac{1}{\bar{N}^y}\right)^2 \left[\bar{N}^x + (p^x)^2 Var(M^x)\right] + \frac{(\bar{N}^x)^2}{(\bar{N}^y)^4} \left[\bar{N}^y + (p^y)^2 Var(M^y)\right] - 2\left(\frac{1}{\bar{N}^y}\right)\left(\frac{\bar{N}^x}{(\bar{N}^y)^2}\right) p^x p^y Cov(M^x, M^y) = \\ &= \frac{\bar{N}^x}{(\bar{N}^y)^2} \left[1 + \frac{\bar{N}^x}{\bar{N}^y}\right] + \left[\frac{(p^x)^2 Var(M^x)}{(\bar{N}^y)^2} - 2\frac{\bar{N}^x p^x p^y}{(\bar{N}^y)^3} \rho(M^x, M^y) [Var(M^x)Var(M^y)]^{1/2} + \frac{(\bar{N}^x)^2 (p^y)^2 Var(M^y)}{(\bar{N}^y)^4}\right] = \\ &= \frac{\bar{N}^x}{(\bar{N}^y)^2} \left[1 + \frac{\bar{N}^x}{\bar{N}^y}\right] + \left[\frac{p^x s(M^x)}{\bar{N}^y} - \frac{\bar{N}^x p^y s(M^y)}{(\bar{N}^y)^2}\right]^2 + 2\frac{\bar{N}^x p^x p^y}{(\bar{N}^y)^3} [1 - \rho(M^x, M^y)] s(M^x) s(M^y) = \\ &= \frac{\bar{N}^x}{(\bar{N}^y)^2} \left[1 + \frac{\bar{N}^x}{\bar{N}^y}\right] + \left[\frac{p^x}{\bar{N}^y}\right]^2 \left[s(M^x) - \frac{\bar{N}^x p^y}{\bar{N}^y p^x} s(M^y)\right]^2 + 2\frac{\bar{N}^x p^x p^y}{(\bar{N}^y)^3} [1 - \rho(M^x, M^y)] s(M^x) s(M^y) = \\ &= \frac{\bar{N}^x}{(\bar{N}^y)^2} \left[1 + \frac{\bar{N}^x}{\bar{N}^y}\right] + \left[\frac{p^x}{\bar{N}^y}\right]^2 \left[s(M^x) - \frac{\bar{M}^x}{\bar{M}^y} s(M^y)\right]^2 + 2\frac{\bar{N}^x p^x p^y}{(\bar{N}^y)^3} [1 - \rho(M^x, M^y)] s(M^x) s(M^y) = \\ &= \frac{\bar{N}^x}{(\bar{N}^y)^2} \left[1 + \frac{\bar{N}^x}{\bar{N}^y}\right] + 2\frac{\bar{N}^x p^x p^y}{(\bar{N}^y)^3} [1 - \rho(M^x, M^y)] s(M^x) s(M^y) \quad \left| \begin{array}{l} s(M^x) \text{ is proportional to } M^x \\ s(M^y) \text{ is proportional to } M^y \end{array} \right. \end{aligned}$$

It immediately follows from the derivation above that

$$RSD\%\left(\frac{N^x}{N^y}\right) = \left[\frac{1}{\bar{N}^x} + \frac{1}{\bar{N}^y} + 2[1 - \rho(M^x, M^y)] \frac{s(M^x) s(M^y)}{\bar{M}^x \bar{M}^y}\right]^{1/2} \times 100$$

For signals where the excess variance is the dominating variance component, we can assume that

$$\text{Var}(N) = \overline{N} + p^2 \text{Var}(M) \approx p^2 \text{Var}(M) \quad \left| \quad p^2 \text{Var}(M) \gg \overline{N} \right.$$

Accordingly, we obtain:

$$\rho(M^x, M^y) = \frac{\text{Cov}(M^x, M^y)}{[\text{Var}(M^x) \text{Var}(M^y)]^{1/2}} = \frac{\frac{\text{Cov}(N^x, N^y)}{p^x p^y}}{\left[ \frac{\text{Var}(N^x) \text{Var}(M^y)}{(p^x)^2 (p^y)^2} \right]^{1/2}} = \frac{\text{Cov}(N^x, N^y)}{[\text{Var}(N^x) \text{Var}(M^y)]^{1/2}} = \rho(N^x, N^y)$$

$$s(M^x) = \frac{s(N^x)}{p^x}; \quad s(M^y) = \frac{s(N^y)}{p^y}; \quad \overline{M}^x = \frac{\overline{N}^x}{p^x}; \quad \overline{M}^y = \frac{\overline{N}^y}{p^y}$$

↓

$$RSD\% \left( \frac{N^x}{N^y} \right) \approx \left[ \frac{1}{\overline{N}^x} + \frac{1}{\overline{N}^y} + 2[1 - \rho(N^x, N^y)] \frac{s(N^x)}{\overline{N}^x} \frac{s(N^y)}{\overline{N}^y} \right]^{1/2} \times 100$$
