# Supplementary material for: The ICPMS signal as a Poisson process: a review of basic concepts
Source: Royal Society of Chemistry journal article supplement (doi:10.1039/c4ja00319e), 2014-12-15
Supplement: c4ja00319e2.xlsx [file c4ja00319e2.xlsx]

## Sheet: jl11a03
																				Electronic Appendix 2
ICPMS data obtained by the analysis of a ~10 ng/g Sm-Nd solution using an Element XR sector field ICPMS and illustarting the different formulae for the count number ratio relative standard deviation; see section 'Fluctuating M, constant p: isotope ratio' and Table 1 for details
Sweep		Intensities, cps						Counts						Count ratios				Count covariances
number		143Nd	145Nd	146Nd	147Sm	149Sm		143Nd	145Nd	146Nd	147Sm	149Sm		143Nd/145Nd	145Nd/146Nd	147Sm/149Sm		143Nd,145Nd	145Nd,146Nd	147Sm,149Sm
1		1489792	1005872	2043488	1715136	1657600		29795.8	20117.4	40869.8	34302.7	33152		1.4811	0.492233	1.03471		12044.9	282157	-676777
2		1522080	1012992	2116608	1849056	1594304		30441.6	20259.8	42332.2	36981.1	31886.1		1.50256	0.478592	1.15979		-61863.7	-32723.7	-1.01568e+06
3		1483168	1043264	2139072	1846912	1718272		29663.4	20865.3	42781.4	36938.2	34365.4		1.42166	0.487718	1.07487		-91039.1	383849	2.91603e+06
4		1482656	1075744	2125824	1774176	1671808		29653.1	21514.9	42516.5	35483.5	33436.2		1.37826	0.506036	1.06123		-220687	575703	110853
5		1544448	1044208	2143616	1749632	1655296		30889	20884.2	42872.3	34992.6	33105.9		1.47906	0.487125	1.05699		543659	445609	-219454
6		1531488	1061664	2158912	1749952	1660512		30629.8	21233.3	43178.2	34999	33210.2		1.44254	0.491759	1.05386		682752	1.01049e+06	-253667
7		1559520	997600	2126080	1762496	1647776		31190.4	19952	42521.6	35249.9	32955.5		1.56327	0.46922	1.06962		-553715	-207860	-50082
8		1475520	1011936	2120448	1724704	1590784		29510.4	20238.7	42409	34494.1	31815.7		1.45812	0.477227	1.08418		41724.6	-48974	606918
9		1506336	1033488	2131968	1786176	1515456		30126.7	20669.8	42639.4	35723.5	30309.1		1.45753	0.484758	1.17864		86344.1	190768	-794152
10		1493888	1013504	2085696	1743072	1686496		29877.8	20270.1	41713.9	34861.4	33729.9		1.47398	0.485931	1.03355		-3079.84	28263.4	-610303
11		1467360	1011984	2092352	1811840	1688992		29347.2	20239.7	41847	36236.8	33779.8		1.44998	0.483659	1.07273		61610.6	20978.3	1.10577e+06
12		1487296	1050912	2112448	1791264	1592096		29745.9	21018.2	42249	35825.3	31841.9		1.41524	0.497485	1.1251		-64735.3	152221	-310423
13		1535584	1047008	2080672	1750176	1656352		30711.7	20940.2	41613.4	35003.5	33127		1.46664	0.503207	1.05664		499902	-232412	-220612
14		1517600	1034288	2083136	1796064	1624000		30352	20685.8	41662.7	35921.3	32480		1.46729	0.496505	1.10595		163454	-114000	-18911.6
15		1488256	995648	1965664	1810496	1631264		29765.1	19913	39313.3	36209.9	32625.3		1.49476	0.50652	1.10987		35895	1.21789e+06	94298.6
16		1528672	1016784	2124224	1735552	1622368		30573.4	20335.7	42484.5	34711	32447.4		1.50344	0.478661	1.06976		-20269.3	-13018.9	43399.3
17		1482816	1029904	2133120	1757248	1539136		29656.3	20598.1	42662.4	35145	30782.7		1.43976	0.482816	1.14171		-44212.1	151524	378026
18		1491328	1013728	2085152	1777184	1653504		29826.6	20274.6	41703	35543.7	33070.1		1.47113	0.486165	1.0748		1621.46	27875.7	100312
19		1469056	1007552	2094720	1748032	1614496		29381.1	20151	41894.4	34960.6	32289.9		1.45804	0.480996	1.08271		98510.5	25934.6	90190.8
20		1461024	1067968	2109952	1716800	1690528		29220.5	21359.4	42199	34336	33810.6		1.36804	0.506157	1.01554		-621728	181815	-1.3321e+06
21		1456832	1001232	2227456	1792800	1696064		29136.6	20024.6	44549.1	35856	33921.3		1.45504	0.449496	1.05704		239963	-858208	693385
22		1459840	952464	2105536	1670912	1596896		29196.8	19049.3	42110.7	33418.2	31937.9		1.5327	0.452362	1.04635		851602	-123866	1.12032e+06
23		1382112	954512	2017568	1807008	1625024		27642.2	19090.2	40351.4	36140.2	32500.5		1.44798	0.4731	1.11199		2.80442e+06	2.12011e+06	-10420.8
24		1554176	1001392	2066368	1719680	1698400		31083.5	20027.8	41327.4	34393.6	33968		1.55202	0.484615	1.01253		-415789	231305	-1.41008e+06
25		1492736	1075520	2116416	1823744	1568448		29854.7	21510.4	42328.3	36474.9	31369		1.38792	0.50818	1.16277		11387.1	357662	-1.27266e+06
26		1532000	1048160	2187584	1788800	1588416		30640	20963.2	43751.7	35776	31768.3		1.46161	0.47914	1.12615		476888	1.04061e+06	-307681
27		1505568	1002864	2130048	1749344	1628608		30111.4	20057.3	42601	34986.9	32572.2		1.50127	0.470818	1.07413		-81628	-178981	-21933.7
28		1468032	1010032	2093280	1676544	1558176		29360.6	20200.6	41865.6	33530.9	31163.5		1.45345	0.482512	1.07597		78847.7	24570.2	2.47449e+06
29		1436608	995488	2017568	1744096	1653856		28732.2	19909.8	40351.4	34881.9	33077.1		1.44312	0.49341	1.05456		504843	755523	-271139
30		1441888	977856	2030048	1795904	1601408		28837.8	19557.1	40601	35918.1	32028.2		1.47454	0.481691	1.12145		812048	1.14144e+06	-269464
31		1531904	1019632	2088800	1808640	1648256		30638.1	20392.6	41776	36172.8	32965.1		1.50241	0.488142	1.09731		23118.3	-7007.85	365256
32		1477344	1002448	2100352	1747584	1552480		29546.9	20049	42007	34951.7	31049.6		1.47374	0.477276	1.12567		93704.4	2965.88	602768
33		1500288	1008448	2144832	1740192	1680576		30005.8	20169	42896.6	34803.8	33611.5		1.48772	0.470176	1.03547		-31314.4	-171226	-614104
34		1529856	1000544	1990208	1767680	1651936		30597.1	20010.9	39804.2	35353.6	33038.7		1.52902	0.502733	1.07007		-265284	780099	-5103.26
35		1510912	1049728	2125440	1718816	1612544		30218.2	20994.6	42508.8	34376.3	32250.9		1.43934	0.493887	1.0659		235669	310691	259596
36		1528736	1064224	2207040	1696736	1604608		30574.7	21284.5	44140.8	33934.7	32092.2		1.43648	0.482195	1.05741		672251	1.95647e+06	602491
37		1558496	1040880	2095840	1763968	1639520		31169.9	20817.6	41916.8	35279.4	32790.4		1.49729	0.496641	1.07591		601744	-45260.1	-23216.4
38		1418272	995120	2119616	1752832	1572704		28365.4	19902.4	42392.3	35056.6	31454.1		1.42523	0.469481	1.11453		682125	-173304	325028
39		1452896	1008448	2104256	1802432	1673888		29057.9	20169	42085.1	36048.6	33477.8		1.44072	0.479242	1.07679		153076	-13355.1	660553
40		1514848	992960	1991040	1707296	1663616		30297	19859.2	39820.8	34145.9	33272.3		1.52559	0.498714	1.02626		-228028	1.10727e+06	-923310
41		1413248	1014032	2054368	1767008	1593344		28265	20280.6	41087.4	35340.2	31866.9		1.39369	0.493598	1.10899		130901	76983.8	14987.3
42		1424256	1029600	2084192	1705760	1530464		28485.1	20592	41683.8	34115.2	30609.3		1.38331	0.494004	1.11454		-310688	-76006.6	2.37719e+06
43		1483840	996656	2092192	1700864	1653344		29676.8	19933.1	41843.8	34017.3	33066.9		1.48882	0.476369	1.02874		72299.8	74295.8	-744343
44		1463936	1003024	2013376	1683552	1596096		29278.7	20060.5	40267.5	33671	31921.9		1.45952	0.49818	1.05479		171530	529962	1.00179e+06
45		1491552	999920	2082144	1798112	1657440		29831	19998.4	41642.9	35962.2	33148.8		1.49167	0.480236	1.08487		5020.63	136397	380255
46		1510752	1006448	2099648	1734176	1617216		30215	20129	41993	34683.5	32344.3		1.50107	0.479341	1.07232		-86837.2	5513.82	115277
47		1510976	1042944	2221824	1759712	1618624		30219.5	20858.9	44436.5	35194.2	32372.5		1.44876	0.469409	1.08717		185634	1.19883e+06	23910.9
48		1552928	1027376	2150016	1686240	1543296		31058.6	20547.5	43000.3	33724.8	30865.9		1.51155	0.477846	1.09262		223361	181051	2.70025e+06
49		1422080	1006560	2046016	1743360	1609696		28441.6	20131.2	40920.3	34867.2	32193.9		1.41281	0.491961	1.08304		325958	254633	158747
50		1452352	1012560	2066432	1771936	1557088		29047	20251.2	41328.6	35438.7	31141.8		1.43434	0.490004	1.13798		89585.6	77241.6	-103454
51		1423712	982704	2028448	1748864	1634144		28474.2	19654.1	40569	34977.3	32682.9		1.44877	0.484461	1.0702		972293	1.02689e+06	-65235.8
52		1437664	971600	2063104	1716576	1587584		28753.3	19432	41262.1	34331.5	31751.7		1.47969	0.470941	1.08125		1.01674e+06	702712	786456
53		1411680	998240	2122304	1698144	1554176		28233.6	19964.8	42446.1	33962.9	31083.5		1.41417	0.470357	1.09263		642378	-171285	2.00316e+06
54		1407872	979328	2077952	1702048	1537376		28157.4	19586.6	41559	34041	30747.5		1.43759	0.471295	1.10711		1.31097e+06	355394	2.33579e+06
55		1461728	995760	2038720	1736640	1575264		29234.6	19915.2	40774.4	34732.8	31505.3		1.46795	0.488424	1.10244		273565	556817	635955
56		1470912	1000608	2020608	1712576	1568096		29418.2	20012.2	40412.2	34251.5	31361.9		1.47002	0.495201	1.09214		149864	563654	1.28077e+06
57		1437952	1027120	2022304	1715392	1486752		28759	20542.4	40446.1	34307.8	29735		1.39998	0.507896	1.15378		-194244	-280946	2.93304e+06
58		1464256	957552	2046624	1753664	1632448		29285.1	19151	40932.5	35073.3	32649		1.52917	0.467869	1.07425		678578	1.31429e+06	-39174.9
59		1438176	1000496	2085472	1725536	1607072		28763.5	20009.9	41709.4	34510.7	32141.4		1.43746	0.479746	1.07371		382313	108559	317556
60		1404736	1024160	2121920	1748032	1647104		28094.7	20483.2	42438.4	34960.6	32942.1		1.3716	0.482657	1.06128		-209488	50506.1	-172423
61		1483744	1021888	2124160	1798112	1684928		29674.9	20437.8	42483.2	35962.2	33698.6		1.45196	0.481079	1.06717		-12618	34660.5	709515
62		1548928	997280	2102080	1788768	1642752		30978.6	19945.6	42041.6	35775.4	32855		1.55315	0.474425	1.08888		-473799	-10502	140564
63		1513440	1056128	2152640	1884960	1728832		30268.8	21122.6	43052.8	37699.2	34576.6		1.43301	0.49062	1.09031		321849	786640	4.81832e+06
64		1540000	999024	2075232	1742848	1531744		30800	19980.5	41504.6	34857	30634.9		1.5415	0.481404	1.13782		-365862	196040	951465
65		1486560	969808	2099712	1761248	1621760		29731.2	19396.2	41994.2	35225	32435.2		1.53284	0.461877	1.08601		109881	21503.3	10888.5
66		1449024	982960	2080544	1834848	1691008		28980.5	19659.2	41610.9	36697	33820.2		1.47414	0.472453	1.08506		608732	285656	1.74208e+06
67		1523744	972816	2028672	1756064	1587488		30474.9	19456.3	40573.4	35121.3	31749.8		1.56632	0.479533	1.10619		-571602	1.30908e+06	184954
68		1445472	1018624	2071520	1790336	1607584		28909.4	20372.5	41430.4	35806.7	32151.7		1.41904	0.491728	1.11368		-8401.7	-5264.31	-160605
69		1439072	976960	2044704	1723296	1558496		28781.4	19539.2	40894.1	34465.9	31169.9		1.47301	0.4778	1.10574		876518	925183	1.20609e+06
70		1479168	1021728	2092608	1777120	1613536		29583.4	20434.6	41852.2	35542.4	32270.7		1.44771	0.488256	1.10138		-18577.9	-11676.2	-43546.8
71		1457376	1034816	2137728	1736704	1631168		29147.5	20696.3	42754.6	34734.1	32623.4		1.40834	0.484073	1.0647		-232068	245653	-68880.5
72		1423552	968752	2166016	1743360	1557344		28471	19375	43320.3	34867.2	31146.9		1.46947	0.447251	1.11944		1.3579e+06	-1.2888e+06	678208
73		1529696	982432	2027136	1675744	1506016		30593.9	19648.6	40542.7	33514.9	30120.3		1.55705	0.48464	1.1127		-535520	1.05352e+06	4.42439e+06
74		1469792	1010192	2041888	1692160	1598688		29395.8	20203.8	40837.8	33843.2	31973.8		1.45496	0.494734	1.05847		71678.5	188190	821071
75		1468128	1023264	2198720	1772544	1587104		29362.6	20465.3	43974.4	35450.9	31742.1		1.43475	0.465391	1.11684		-49082.7	199283	-67577.2
76		1526144	976800	2103872	1713664	1606880		30522.9	19536	42077.4	34273.3	32137.6		1.56239	0.464287	1.06645		-561117	-50453.1	410177
77		1453856	1012832	2040288	1694048	1572704		29077.1	20256.6	40805.8	33881	31454.1		1.43544	0.496416	1.07716		82031.5	129373	1.57103e+06
78		1423264	1032592	2069248	1787936	1554176		28465.3	20651.8	41385	35758.7	31083.5		1.37834	0.499018	1.15041		-397772	-182091	-565565
79		1540544	1025792	2070432	1697920	1671712		30810.9	20515.8	41408.6	33958.4	33434.2		1.50181	0.495448	1.01568		147176	-92598.2	-1.29302e+06
80		1506432	1001760	2043040	1732512	1607264		30128.6	20035.2	40860.8	34650.2	32145.3		1.50379	0.490328	1.07793		-93186.8	379403	262853
81		1434560	1011040	2112896	1835520	1681888		28691.2	20220.8	42257.9	36710.4	33637.8		1.4189	0.478509	1.09134		164615	-34454.4	1.51393e+06
82		1472960	1014512	2088480	1835520	1603776		29459.2	20290.2	41769.6	36710.4	32075.5		1.45189	0.485766	1.1445		28247.5	18085.1	-590524
83		1517536	1040512	2012448	1775552	1568992		30350.7	20810.2	40249	35511	31379.8		1.45845	0.517038	1.13165		226020	-789621	-167518
84		1490144	1035184	2115200	1794496	1658336		29802.9	20703.7	42304	35889.9	33166.7		1.4395	0.489402	1.08211		-14257.5	97812.9	343776
85		1560928	1094496	2147200	1744608	1614176		31218.6	21889.9	42944	34892.2	32283.5		1.42616	0.509732	1.0808		2.09695e+06	1.4158e+06	108544
86		1494592	1043408	2124736	1780992	1645248		29891.8	20868.2	42494.7	35619.8	32905		1.43241	0.491077	1.08251		23743.6	241355	100315
87		1489088	1056768	2096544	1777216	1611136		29781.8	21135.4	41930.9	35544.3	32222.7		1.4091	0.504052	1.10308		-48651.6	-66063.2	-52701.5
88		1525472	1034608	2168128	1796736	1646560		30509.4	20692.2	43362.6	35934.7	32931.2		1.47444	0.47719	1.09121		218445	442409	238447
89		1521504	1037344	2186432	1845056	1710944		30430.1	20746.9	43728.6	36901.1	34218.9		1.46673	0.474446	1.07838		224389	656416	2.62192e+06
90		1504832	1032384	2172224	1781920	1770720		30096.6	20647.7	43444.5	35638.4	35414.4		1.45763	0.475266	1.00633		71570.9	405815	797860
91		1454944	1025168	2151360	1730688	1588448		29098.9	20503.4	43027.2	34613.8	31769		1.41922	0.476521	1.08955		-104325	141363	558376
92		1494400	1038352	2157888	1768448	1644064		29888	20767	43157.8	35369	32881.3		1.4392	0.481189	1.07566		17436.5	460559	2070.68
93		1539424	1019152	2124288	1759584	1642336		30788.5	20383	42485.8	35191.7	32846.7		1.51049	0.479762	1.07139		18441.9	9171.07	-57127.4
94		1459744	1042832	2040000	1765536	1606176		29194.9	20856.6	40800	35310.7	32123.5		1.39979	0.511192	1.09922		-320499	-599893	20535.2
95		1471936	1014304	2108608	1746016	1614848		29438.7	20286.1	42172.2	34920.3	32297		1.45118	0.48103	1.08123		31437.1	-12053.2	96102.7
96		1516032	984496	2088576	1756096	1619552		30320.6	19689.9	41771.5	35121.9	32391		1.53991	0.471372	1.08431		-320521	164992	29657.5
97		1471136	1046160	2065536	1774976	1706624		29422.7	20923.2	41310.7	35499.5	34132.5		1.40622	0.506484	1.04005		-236234	-395010	220445
98		1521984	1043840	2109568	1697760	1660352		30439.7	20876.8	42191.4	33955.2	33207		1.45806	0.494812	1.02253		305358	89771.8	-976035
99		1487072	1029968	2061952	1753152	1611680		29741.4	20599.4	41239	35063	32233.6		1.4438	0.499511	1.08778		-24376.7	-183366	84167.8
100		1535296	1015568	2061632	1735776	1701504		30705.9	20311.4	41232.6	34715.5	34030.1		1.51176	0.492604	1.02014		-44897.2	40867	-982191
101		1503648	1055872	2160384	1768000	1612896		30073	21117.4	43207.7	35360	32257.9		1.42408	0.488743	1.09616		172026	898104	850.791
102		1457536	1007616	2150976	1788800	1612992		29150.7	20152.3	43019.5	35776	32259.8		1.44652	0.468446	1.10899		146572	-211822	-104842
103		1481696	982288	2144832	1771168	1638592		29633.9	19645.8	42896.6	35423.4	32771.8		1.50841	0.457979	1.08091		151350	-631732	15486.1
104		1516416	997760	2041920	1833664	1689984		30328.3	19955.2	40838.4	36673.3	33799.7		1.51982	0.488638	1.08502		-197424	481003	1.68432e+06
105		1552480	1039824	2179904	1800896	1680032		31049.6	20796.5	43598.1	36017.9	33600.6		1.49302	0.477004	1.07194		521661	684810	711380
106		1549152	1004240	2090144	1786080	1539296		30983	20084.8	41802.9	35721.6	30785.9		1.54261	0.480465	1.16032		-317227	59526.8	-619092
107		1497280	1036816	2038240	1738432	1604224		29945.6	20736.3	40764.8	34768.6	32084.5		1.44411	0.508682	1.08366		37583.7	-466650	255366
108		1462048	1041840	2140096	1864288	1680576		29241	20836.8	42801.9	37285.8	33611.5		1.40333	0.486819	1.10931		-285795	371756	2.11012e+06
109		1475776	1052480	2115712	1780736	1594848		29515.5	21049.6	42314.2	35614.7	31897		1.40219	0.497459	1.11656		-225914	204301	-155095
110		1469536	1013984	2126336	1687136	1702048		29390.7	20279.7	42526.7	33742.7	34041		1.44927	0.476869	0.991239		38059.2	-42768	-2.47477e+06
111		1522720	1047696	2123520	1803744	1635232		30454.4	20953.9	42470.4	36074.9	32704.6		1.4534	0.493377	1.10305		359927	268011	135726
112		1472160	1019936	2205760	1798752	1559904		29443.2	20398.7	44115.2	35975	31198.1		1.44338	0.462397	1.15312		-14145	73922.3	-804905
113		1543936	1050272	2114752	1816032	1655424		30878.7	21005.4	42295	36320.6	33108.5		1.47003	0.496641	1.09702		663723	178826	569206
114		1478944	1025472	2187520	1868288	1592128		29578.9	20509.4	43750.4	37365.8	31842.6		1.44221	0.468783	1.17345		-38807.8	253054	-1.3443e+06
115		1484512	1018416	2095904	1781824	1642272		29690.2	20368.3	41918.1	35636.5	32845.4		1.45767	0.485908	1.08497		-745.309	-474.473	90563.8
116		1486048	997808	2115584	1799040	1651456		29721	19956.2	42311.7	35980.8	33029.1		1.48931	0.471647	1.08937		50441.2	-120250	318140
117		1511392	1002608	2070592	1756096	1563936		30227.8	20052.2	41411.8	35121.9	31278.7		1.50746	0.484213	1.12287		-119257	188244	298176
118		1461600	1023264	2113728	1714240	1579040		29232	20465.3	42274.6	34284.8	31580.8		1.42837	0.484104	1.08562		-62371.4	26269.1	1.00636e+06
119		1439712	1010880	2078112	1797376	1598432		28794.2	20217.6	41562.2	35947.5	31968.6		1.42422	0.486442	1.12446		153273	66271	-318536
120		1433440	1014512	2138112	1761088	1539776		28668.8	20290.2	42762.2	35221.8	30795.5		1.41294	0.47449	1.14373		86150.3	-54633.4	243259
121		1489248	1035296	2093408	1830528	1599552		29785	20705.9	41868.2	36610.6	31991		1.43848	0.494551	1.1444		-20487.6	-50784.4	-652123
122		1446752	988496	1999136	1771456	1693568		28935	19769.9	39982.7	35429.1	33871.4		1.46359	0.494462	1.04599		540008	1.20719e+06	89316.2
123		1518752	994496	2171776	1707232	1597504		30375	19889.9	43435.5	34144.6	31950.1		1.52716	0.457918	1.06869		-251114	-672031	687111
124		1449408	978912	2089088	1786784	1584608		28988.2	19578.2	41781.8	35735.7	31692.2		1.48063	0.468583	1.12759		672676	184307	-305978
125		1489504	994816	2055488	1756064	1619072		29790.1	19896.3	41109.8	35121.3	32381.4		1.49727	0.48398	1.08461		25560	423594	32059.8
126		1480256	1004400	2075552	1783072	1665952		29605.1	20088	41511	35661.4	33319		1.47377	0.483919	1.0703		66028.9	139245	240027
127		1486016	995808	2026080	1717696	1586464		29720.3	19916.2	40521.6	34353.9	31729.3		1.49227	0.491495	1.08272		55680.8	668711	791993
128		1498016	1020048	2124800	1824448	1700320		29960.3	20401	42496	36489	34006.4		1.46857	0.480068	1.073		4327.98	17964.4	1.68002e+06
129		1558016	1002448	2069152	1813152	1589920		31160.3	20049	41383	36263	31798.4		1.55421	0.484473	1.1404		-413783	199237	-643742
130		1554048	981392	2055584	1695488	1622656		31081	19627.8	41111.7	33909.8	32453.1		1.58351	0.477427	1.04488		-909397	665615	88339.5
131		1452256	1010816	1995488	1704576	1536704		29045.1	20216.3	39909.8	34091.5	30734.1		1.43672	0.506551	1.10924		117694	310060	2.26357e+06
132		1484608	994816	2098240	1739296	1576288		29692.2	19896.3	41964.8	34785.9	31525.8		1.49234	0.474119	1.10341		71306	24138.8	570552
133		1486880	1004336	2091616	1692544	1570208		29737.6	20086.7	41832.3	33850.9	31404.2		1.48046	0.480172	1.07791		29668.2	50968.4	1.67841e+06
134		1453760	1034176	2030112	1758112	1605568		29075.2	20683.5	40602.2	35162.2	32111.4		1.40572	0.509418	1.09501		-246287	-452585	80943.1
135		1469536	989696	2035360	1731232	1677536		29390.7	19793.9	40707.2	34624.6	33550.7		1.48484	0.486251	1.03201		258629	745730	-765886
136		1439616	1017312	2083104	1754528	1649824		28792.3	20346.2	41662.1	35090.6	32996.5		1.41512	0.488364	1.06346		18163.1	6115.91	-131632
137		1541184	1054848	2113728	1836576	1691392		30823.7	21097	42274.6	36731.5	33827.8		1.46105	0.499046	1.08584		717978	189300	1.79774e+06
138		1524992	1083232	2089728	1682208	1568064		30499.8	21664.6	41794.6	33644.2	31361.3		1.40782	0.51836	1.07279		852311	-288736	1.98153e+06
139		1509792	1033968	2062944	1777792	1638368		30195.8	20679.4	41258.9	35555.8	32767.4		1.46019	0.50121	1.0851		110883	-239294	48796.3
140		1550208	1055616	2175808	1812800	1688128		31004.2	21112.3	43516.2	36256	33762.6		1.46853	0.48516	1.07385		868161	1.123e+06	1.11465e+06
141		1513408	1037616	2167616	1791584	1601024		30268.2	20752.3	43352.3	35831.7	32020.5		1.45854	0.47869	1.11902		164615	519409	-231094
142		1497696	1042416	2080224	1791712	1621120		29953.9	20848.3	41604.5	35834.2	32422.4		1.43675	0.501108	1.10523		52908	-199742	-43086.2
143		1461952	930656	2153216	1834304	1654048		29239	18613.1	43064.3	36686.1	33081		1.57088	0.432217	1.10898		1.06029e+06	-1.83413e+06	750090
144		1500768	1028224	2066816	1810944	1640928		30015.4	20564.5	41336.3	36218.9	32818.6		1.45957	0.497492	1.10361		34281.3	-136698	260659
145		1511168	1025632	1950272	1711840	1556256		30223.4	20512.6	39005.4	34236.8	31125.1		1.4734	0.525892	1.09997		56460.6	-449072	1.56449e+06
146		1436768	1020096	2056544	1782624	1570720		28735.4	20401.9	41130.9	35652.5	31414.4		1.40846	0.496024	1.13491		-42627	-34026.5	-317926
147		1534496	1052608	2245248	1803392	1669216		30689.9	21052.2	44905	36067.8	33384.3		1.4578	0.468816	1.08038		582008	1.98919e+06	613229
148		1487936	1023840	2092192	1733600	1613792		29758.7	20476.8	41843.8	34672	32275.8		1.45329	0.489362	1.07424		-9752.1	-19559.3	164573
149		1471904	1000128	2047744	1753376	1701824		29438.1	20002.6	40954.9	35067.5	34036.5		1.47172	0.488405	1.03029		146797	383168	-450387
150		1521216	1081824	1973600	1697984	1681344		30424.3	21636.5	39472	33959.7	33626.9		1.40616	0.548148	1.0099		737730	-3.23906e+06	-1.56224e+06
151		1557408	1037984	2102784	1760800	1571296		31148.2	20759.7	42055.7	35216	31425.9		1.50042	0.493624	1.1206		516372	15534.6	160284
152		1441504	1043632	2137344	1711136	1568608		28830.1	20872.6	42746.9	34222.7	31372.2		1.38124	0.488285	1.09086		-516633	371883	1.30227e+06
153		1433536	1011872	2155328	1845696	1597024		28670.7	20237.4	43106.6	36913.9	31940.5		1.41672	0.469475	1.15571		148001	-137414	-889134
154		1562656	1009552	2015040	1689696	1644448		31253.1	20191	40300.8	33793.9	32889		1.54787	0.501008	1.02752		-242877	295880	-588629
155		1444128	1018624	2157504	1749632	1628768		28882.6	20372.5	43150.1	34992.6	32575.4		1.41772	0.472131	1.07421		-8643.15	10182.5	-22784.3
156		1448768	1024112	2056096	1836064	1695488		28975.4	20482.2	41121.9	36721.3	33909.8		1.41466	0.498086	1.08291		-103238	-106221	1.89552e+06
157		1541696	1029072	2112256	1731072	1636640		30833.9	20581.4	42245.1	34621.4	32732.8		1.49814	0.487191	1.0577		215573	49832.7	-162403
158		1503968	1047168	2169728	1735264	1581952		30079.4	20943.4	43394.6	34705.3	31639		1.43622	0.482626	1.09691		136017	799103	575692
159		1461440	1016672	2143552	1817504	1599232		29228.8	20333.4	42871	36350.1	31984.6		1.43747	0.474293	1.13649		18515.2	-25686.3	-522245
160		1459424	1007024	2097792	1812864	1647104		29188.5	20140.5	41955.8	36257.3	32942.1		1.44924	0.48004	1.10064		146369	13521.4	382779
161		1500672	967648	2067872	1769408	1588992		30013.4	19353	41357.4	35388.2	31779.8		1.55084	0.467944	1.11354		-170426	665974	-18231.2
162		1478240	999280	2095680	1706208	1560384		29564.8	19985.6	41913.6	34124.2	31207.7		1.47931	0.476829	1.09345		105808	38874.1	1.61861e+06
163		1414048	988336	2092000	1770528	1626752		28281	19766.7	41840	35410.6	32535		1.43074	0.472436	1.08838		933260	105313	998.839
164		1488384	1065056	2116416	1726720	1670240		29767.7	21301.1	42328.3	34534.4	33404.8		1.39747	0.503236	1.03382		-72301.4	292398	-738493
165		1405824	972448	2124224	1787776	1636704		28116.5	19449	42484.5	35755.5	32734.1		1.44565	0.45779	1.0923		1.58061e+06	-428013	86356
166		1528672	1015088	2073312	1720896	1593920		30573.4	20301.8	41466.2	34417.9	31878.4		1.50595	0.489597	1.07966		-44985	33969.8	600799
167		1504480	1003344	2116288	1771712	1664224		30089.6	20066.9	42325.8	35434.2	33284.5		1.49947	0.474106	1.06459		-72614.5	-91741.1	54647.1
168		1518144	1052704	2154368	1787776	1614464		30362.9	21054.1	43087.4	35755.5	32289.3		1.44214	0.488637	1.10735		357783	739538	-88092.9
169		1469088	1000976	2095456	1807168	1560096		29381.8	20019.5	41909.1	36143.4	31201.9		1.46766	0.477689	1.15837		159272	36925.8	-1.02339e+06
170		1558912	997120	2085376	1753216	1567040		31178.2	19942.4	41707.5	35064.3	31340.8		1.56341	0.478149	1.11881		-561512	130098	350760
171		1512320	972912	2094240	1817856	1634464		30246.4	19458.2	41884.8	36357.1	32689.3		1.55443	0.464566	1.1122		-363559	119195	174298
172		1556448	1000704	2046592	1874112	1658464		31129	20014.1	40931.8	37482.2	33169.3		1.55535	0.488961	1.13003		-448711	378989	1.38871e+06
173		1538112	1024640	2103744	1717696	1675360		30762.2	20492.8	42074.9	34353.9	33507.2		1.50112	0.487055	1.02527		118628	7552.64	-1.00265e+06
174		1495008	1020896	2147840	1809952	1642976		29900.2	20417.9	42956.8	36199	32859.5		1.46441	0.475313	1.10163		3013.29	51175.1	288845
175		1502272	1014144	2104064	1709120	1597600		30045.4	20282.9	42081.3	34182.4	31952		1.48132	0.481993	1.0698		-16175.8	-5224.88	663554
176		1471424	990864	2103552	1821248	1639456		29428.5	19817.3	42071	36425	32789.1		1.48499	0.471043	1.11089		227397	-29807.5	292189
177		1397920	1002768	2099328	1804928	1661824		27958.4	20055.4	41986.6	36098.6	33236.5		1.39406	0.477661	1.08611		581268	9216.19	531271
178		1481376	1020624	2085920	1745952	1586144		29627.5	20412.5	41718.4	34919	31722.9		1.45144	0.489292	1.10075		-10642.5	-14600.2	351435
179		1442688	1024272	2088096	1764448	1535424		28853.8	20485.4	41761.9	35289	30708.5		1.4085	0.490529	1.14916		-120849	-31040.4	134257
180		1450528	993648	2100544	1806080	1636576		29010.6	19873	42010.9	36121.6	32731.5		1.4598	0.473043	1.10357		409222	2741.78	165020
181		1512480	1046528	1994880	1753056	1644768		30249.6	20930.6	39897.6	35061.1	32895.4		1.44524	0.524607	1.06584		229552	-1.20153e+06	-115280
182		1486976	1055136	2096992	1865504	1598848		29739.5	21102.7	41939.8	37310.1	31977		1.40927	0.503166	1.16678		-77819	-56646.1	-1.04528e+06
183		1487584	1016256	2074912	1844352	1638816		29751.7	20325.1	41498.2	36887	32776.3		1.46379	0.489783	1.12542		3573.39	19888.4	399862
184		1445536	1015888	2063264	1764960	1597760		28910.7	20317.8	41265.3	35299.2	31955.2		1.42293	0.492369	1.10465		42722.2	34357.6	35825.6
185		1483328	1012768	2062048	1806144	1653728		29666.6	20255.4	41241	36122.9	33074.6		1.46463	0.491147	1.09217		19273.5	83861.7	425857
186		1446816	978544	2138752	1760320	1629856		28936.3	19570.9	42775	35206.4	32597.1		1.47854	0.45753	1.08005		720070	-601256	-13060.1
187		1437504	980224	2066656	1780992	1582656		28750.1	19604.5	41333.1	35619.8	31653.1		1.46651	0.474304	1.12532		830905	518674	-220803
188		1458176	1010816	2142848	1748032	1663456		29163.5	20216.3	42857	34960.6	33269.1		1.44257	0.471716	1.05084		100268	-123701	-304117
189		1561728	1009088	2064672	1775168	1603232		31234.6	20181.8	41293.4	35503.4	32064.6		1.54766	0.48874	1.10724		-252573	131402	-62911.9
190		1516480	1046960	2187456	1736096	1538176		30329.6	20939.2	43749.1	34721.9	30763.5		1.44846	0.47862	1.12867		279105	997491	1.1227e+06
191		1490848	1069248	2157760	1819712	1655456		29817	21385	43155.2	36394.2	33109.1		1.3943	0.495536	1.09922		-28428.8	1.16317e+06	613628
192		1508608	1000704	2148160	1728832	1648256		30172.2	20014.1	42963.2	34576.6	32965.1		1.50755	0.465842	1.04889		-114388	-330804	-354972
193		1481376	1038240	2083264	1764064	1622368		29627.5	20764.8	41665.3	35281.3	32447.4		1.42681	0.498372	1.08734		-87191.6	-140933	5458.73
194		1467104	1056704	2129728	1705856	1636576		29342.1	21134.1	42594.6	34117.1	32731.5		1.38838	0.496169	1.04233		-387381	445466	-271206
195		1539296	1042992	2232896	1848928	1699488		30785.9	20859.8	44657.9	36978.6	33989.8		1.47585	0.467103	1.08793		467122	1.31106e+06	2.38387e+06
196		1506912	1037024	2051936	1687424	1555296		30138.2	20740.5	41038.7	33748.5	31105.9		1.45311	0.505388	1.08495		110625	-368594	2.27366e+06
197		1506016	1031760	2109888	1708640	1550048		30120.3	20635.2	42197.8	34172.8	31001		1.45966	0.489012	1.10231		74861.8	49257.1	1.80118e+06
198		1467712	1033552	2035968	1778528	1637024		29354.2	20671	40719.4	35570.6	32740.5		1.42007	0.507646	1.08644		-150865	-398916	46956.8
199		1534336	1006656	1983584	1731744	1605952		30686.7	20133.1	39671.7	34634.9	32119		1.52419	0.507494	1.07833		-193961	540187	287629
200		1498464	985488	2050272	1677216	1690624		29969.3	19709.8	41005.4	33544.3	33812.5		1.52053	0.480662	0.992069		-81382.8	660948	-2.36213e+06
201		1588832	1028432	2107072	1796736	1623616		31776.6	20568.6	42141.4	35934.7	32472.3		1.54491	0.488086	1.10663		396304	25636.8	-23755.5
202		1451616	1005136	2231808	1873888	1650048		29032.3	20102.7	44636.2	37477.8	33001		1.4442	0.450368	1.13566		211874	-683157	1.02987e+06
203		1497824	1041312	2196288	1848608	1656160		29956.5	20826.2	43925.8	36972.2	33123.2		1.4384	0.474124	1.1162		51683	883510	980273
204		1460800	962080	2126592	1826880	1668896		29216	19241.6	42531.8	36537.6	33377.9		1.51838	0.452405	1.09466		705440	-578193	1.0146e+06
205		1528736	1031440	2130688	1866688	1632832		30574.7	20628.8	42613.8	37333.8	32656.6		1.48214	0.484088	1.14322		193652	158463	281271
206		1585216	1023152	2126464	1799072	1664096		31704.3	20463	42529.3	35981.4	33281.9		1.54935	0.481152	1.08111		185102	51046.4	474729
207		1490368	1030384	2080096	1762560	1589216		29807.4	20607.7	41601.9	35251.2	31784.3		1.44642	0.495354	1.10908		-9140.11	-101226	81802.6
208		1540544	1033808	2147328	1819168	1594912		30810.9	20676.2	42946.6	36383.4	31898.2		1.49016	0.481439	1.14061		302060	290804	-627990
209		1495392	1029648	2136640	1819936	1660096		29907.8	20593	42732.8	36398.7	33201.9		1.45233	0.481901	1.09628		14467.3	164371	712379
210		1489888	1014192	1992672	1837056	1641088		29797.8	20283.8	39853.4	36741.1	32821.8		1.46904	0.508961	1.11941		3746.41	172302	424176
211		1574880	1069824	2038624	1843904	1655424		31497.6	21396.5	40772.5	36878.1	33108.5		1.47209	0.524777	1.11386		1.70732e+06	-1.28502e+06	900652
212		1580512	1048160	2124800	1737024	1615552		31610.2	20963.2	42496	34740.5	32311		1.50789	0.493298	1.07519		1.05874e+06	287576	126347
213		1523904	1040784	1996480	1773568	1626720		30478.1	20815.7	39929.6	35471.4	32534.4		1.46419	0.52131	1.09027		286362	-943646	2215.35
214		1498688	1039616	2219008	1885024	1704896		29973.8	20792.3	44380.2	37700.5	34097.9		1.44158	0.468505	1.10565		55304.6	1.0136e+06	3.70212e+06
215		1484992	1053664	2190592	1865056	1674528		29699.8	21073.3	43811.8	37301.1	33490.6		1.40936	0.480995	1.11378		-102884	1.27432e+06	1.89258e+06
216		1553824	1027904	1979008	1796736	1655648		31076.5	20558.1	39580.2	35934.7	33113		1.51164	0.519404	1.08522		239665	-474063	342304
217		1556800	1051648	2176896	1778144	1611840		31136	21033	43537.9	35562.9	32236.8		1.48034	0.483095	1.10318		864416	1.01855e+06	-55295.9
218		1421120	1008512	2165504	1777440	1538976		28422.4	20170.2	43310.1	35548.8	30779.5		1.40913	0.465717	1.15495		274888	-250000	-321685
219		1450848	988064	2167872	1736192	1596512		29017	19761.3	43357.4	34723.8	31930.2		1.46837	0.455776	1.08749		498535	-807556	373237
220		1472000	997024	2121344	1796576	1656288		29440	19940.5	42426.9	35931.5	33125.8		1.47639	0.469996	1.0847		171234	-173611	347660
221		1471424	1003504	2125696	1763968	1582624		29428.5	20070.1	42513.9	35279.4	31652.5		1.46629	0.472083	1.11458		122153	-145961	72327.6
222		1497920	1000176	2064320	1749888	1648416		29958.4	20003.5	41286.4	34997.8	32968.3		1.49766	0.484506	1.06156		-40896.5	262809	-166122
223		1581632	1035184	2180544	1776256	1677792		31632.6	20703.7	43610.9	35525.1	33555.8		1.52788	0.474737	1.05869		608195	542390	168583
224		1486560	1028480	2148736	1798816	1602368		29731.2	20569.6	42974.7	35976.3	32047.4		1.4454	0.478644	1.1226		-23411.5	197498	-285984
225		1474912	1002608	2068576	1748256	1649824		29498.2	20052.2	41371.5	34965.1	32996.5		1.47108	0.484685	1.05966		107895	200797	-192167
226		1547936	1023104	2069152	1784608	1726560		30958.7	20462.1	41383	35692.2	34531.2		1.51298	0.494456	1.03362		109814	-62445	663363
227		1511392	1003712	2088896	1763968	1629568		30227.8	20074.2	41777.9	35279.4	32591.4		1.5058	0.480499	1.08248		-110800	69002.2	-6504.3
228		1480352	1022416	2080992	1766912	1655904		29607	20448.3	41619.8	35338.2	33118.1		1.4479	0.491312	1.06704		-20166.7	-33643.1	-15155.2
229		1515776	1045840	2200320	1749344	1712448		30315.5	20916.8	44006.4	34986.9	34249		1.44934	0.475313	1.02155		260455	1.10103e+06	-653155
230		1494592	1017984	2135360	1779744	1589824		29891.8	20359.7	42707.2	35594.9	31796.5		1.46819	0.476727	1.11946		-179.612	-2636.93	-166122
231		1477376	1010928	2139072	1824736	1670944		29547.5	20218.6	42781.4	36494.7	33418.9		1.46141	0.472601	1.09204		43085.8	-110873	1.0239e+06
232		1524672	983072	2210752	1732320	1642976		30493.4	19661.4	44215	34646.4	32859.5		1.55093	0.444678	1.05438		-455389	-1.54352e+06	-247787
233		1514432	1020528	2080480	1745184	1621344		30288.6	20410.6	41609.6	34903.7	32426.9		1.48397	0.490525	1.07638		20888.6	-19148.2	39995.6
234		1506816	1038928	2122688	1761088	1611488		30136.3	20778.6	42453.8	35221.8	32229.8		1.45036	0.48944	1.09283		121003	181503	40223.1
235		1524256	1060576	2132672	1811168	1602752		30485.1	21211.5	42653.4	36223.4	32055		1.4372	0.497299	1.13004		543013	540165	-394631
236		1507936	1013664	2173504	1714944	1646944		30158.7	20273.3	43470.1	34298.9	32938.9		1.48761	0.466373	1.04129		-28321.9	-131141	-452373
237		1508000	1035072	2103552	1771840	1696192		30160	20701.4	42071	35436.8	33923.8		1.4569	0.492059	1.0446		106522	18441.7	103598
238		1505728	1028224	2090848	1811776	1695520		30114.6	20564.5	41817	36235.5	33910.4		1.4644	0.491774	1.06857		54218.7	-40097.9	1.21803e+06
239		1546336	1034448	2172736	1824512	1690048		30926.7	20689	43454.7	36490.2	33801		1.49484	0.476104	1.07956		352127	468097	1.45042e+06
240		1525792	1063104	2193920	1789312	1629632		30515.8	21262.1	43878.4	35786.2	32592.6		1.43522	0.484568	1.09799		602992	1.6731e+06	33302.8
241		1491616	1036880	2182848	1804928	1617056		29832.3	20737.6	43657	36098.6	32341.1		1.43856	0.475012	1.11618		-4665.61	613711	-127030
242		1426400	1004240	2062240	1774176	1592192		28528	20084.8	41244.8	35483.5	31843.8		1.42038	0.486966	1.1143		366987	215062	-80538
243		1470496	1000288	2032320	1730368	1577952		29409.9	20005.8	40646.4	34607.4	31559		1.47007	0.49219	1.09659		155570	490125	721835
244		1459936	1049152	2077824	1719648	1558752		29198.7	20983	41556.5	34393	31175		1.39154	0.504928	1.10322		-400269	-284983	1.29918e+06
245		1471040	982864	2118144	1725792	1619168		29420.8	19657.3	42362.9	34515.8	32383.4		1.49669	0.464021	1.06585		299430	-244641	110626
246		1395744	1046272	2210304	1844352	1590176		27914.9	20925.4	44206.1	36887	31803.5		1.33402	0.473361	1.15984		-1.0845e+06	1.23044e+06	-1.08241e+06
247		1509952	1031232	2110656	1701728	1546976		30199	20624.6	42213.1	34034.6	30939.5		1.46422	0.488584	1.10004		92509.3	51353.8	2.09197e+06
248		1472288	1041312	2077792	1778816	1646464		29445.8	20826.2	41555.8	35576.3	32929.3		1.41388	0.501163	1.08039		-184649	-213153	88475.6
249		1505184	1012304	2170880	1828736	1684704		30103.7	20246.1	43417.6	36574.7	33694.1		1.48689	0.46631	1.08549		-30398.1	-164517	1.42967e+06
250		1550656	1056448	2219392	1836352	1603232		31013.1	21129	44387.8	36727	32064.6		1.4678	0.476008	1.14541		894312	1.8152e+06	-612656
251		1495264	1082816	2187264	1770528	1621408		29905.3	21656.3	43745.3	35410.6	32428.2		1.3809	0.495055	1.09197		78200.9	2.23505e+06	-4049.77
252		1493440	1044736	2083488	1767072	1638432		29868.8	20894.7	41669.8	35341.4	32768.6		1.42949	0.501436	1.07851		12753.9	-184180	-5574.78
253		1443072	1010240	1977728	1766048	1655648		28861.4	20204.8	39554.6	35321	33113		1.42844	0.510808	1.06668		156056	390699	-25378.7
254		1442368	995280	1977920	1680672	1584992		28847.4	19905.6	39558.4	33613.4	31699.8		1.44921	0.503195	1.06037		456721	1.12554e+06	1.4245e+06
255		1517664	985232	2137344	1770144	1667296		30353.3	19704.6	42746.9	35402.9	33345.9		1.54041	0.460961	1.06169		-335022	-481237	32911.8
256		1524064	1000608	2129152	1782080	1676224		30481.3	20012.2	42583	35641.6	33524.5		1.52314	0.469956	1.06315		-223622	-199058	281222
257		1442464	1027696	2196608	1791328	1639200		28849.3	20553.9	43932.2	35826.6	32784		1.40359	0.467856	1.09281		-189568	364790	125123
258		1438048	1031808	2015456	1827424	1662688		28761	20636.2	40309.1	36548.5	33253.8		1.39372	0.511948	1.09908		-295520	-465530	876856
259		1554336	977488	2024928	1762048	1647936		31086.7	19549.8	40498.6	35241	32958.7		1.59013	0.482727	1.06925		-1.0106e+06	1.23518e+06	-54430.5
260		1541408	1001872	2123584	1877216	1664960		30828.2	20037.4	42471.7	37544.3	33299.2		1.53853	0.471784	1.12748		-320635	-148425	1.71275e+06
261		1545728	1039408	2017632	1829216	1634784		30914.6	20788.2	40352.6	36584.3	32695.7		1.48712	0.515162	1.11893		454290	-706566	221960
262		1551136	1029648	2093408	1753120	1672256		31022.7	20593	41868.2	35062.4	33445.1		1.50647	0.491853	1.04836		270290	-34031.4	-280228
263		1567040	1037552	2211776	1779264	1666880		31340.8	20751	44235.5	35585.3	33337.6		1.51032	0.469104	1.06742		579767	859976	182827
264		1499008	1046800	2225536	1746400	1662464		29980.2	20936	44510.7	34928	33249.3		1.43199	0.470359	1.05049		77498.8	1.42796e+06	-320131
265		1466400	985648	2097152	1665632	1633504		29328	19713	41943	33312.6	32670.1		1.48775	0.469994	1.01967		336192	47768.5	-320287
266		1533536	1018256	2060000	1722752	1630240		30670.7	20365.1	41200	34455	32604.8		1.50604	0.494299	1.05675		1339.99	-1324.64	-82568.1
267		1468768	1041408	2142272	1777344	1482464		29375.4	20828.2	42845.4	35546.9	29649.3		1.41037	0.486123	1.19891		-218127	385191	-525818
268		1467488	1008032	2154688	1704832	1676928		29349.8	20160.6	43093.8	34096.6	33538.6		1.4558	0.467832	1.01664		100421	-218537	-1.29793e+06
269		1479328	956880	2049408	1766464	1619616		29586.6	19137.6	40988.2	35329.3	32392.3		1.54599	0.466906	1.09067		316565	1.2606e+06	4138.85
270		1522080	1044944	2008192	1664928	1618944		30441.6	20898.9	40163.8	33298.6	32378.9		1.45661	0.520341	1.0284		319521	-991865	278773
271		1444288	997968	2140480	1786336	1627584		28885.8	19959.4	42809.6	35726.7	32551.7		1.44723	0.466236	1.09754		387581	-320534	13731.1
272		1534176	1068384	2093344	1783008	1615872		30683.5	21367.7	41866.9	35660.2	32317.4		1.43598	0.510372	1.10343		842236	-150215	-58314.8
273		1387968	994384	2037344	1776864	1656992		27759.4	19887.7	40746.9	35537.3	33139.8		1.39581	0.488079	1.07234		992285	604093	108887
274		1500832	974016	2045856	1777664	1623552		30016.6	19480.3	40917.1	35553.3	32471		1.54087	0.476092	1.09492		-151773	970921	-8140.46
275		1525312	1013040	2173568	1849760	1603360		30506.2	20260.8	43471.4	36995.2	32067.2		1.50568	0.466072	1.15368		-67929.2	-149414	-728950
276		1476416	1018256	2076352	1804704	1684928		29528.3	20365.1	41527	36094.1	33698.6		1.44995	0.490406	1.07109		-513.443	-794.05	865702
277		1477920	996864	2193280	1713472	1576320		29558.4	19937.3	43865.6	34269.4	31526.4		1.48257	0.454508	1.08701		122065	-788132	1.0802e+06
278		1521600	1037344	2113216	1715392	1607296		30432	20746.9	42264.3	34307.8	32145.9		1.46682	0.490884	1.06725		225125	95021.6	388391
279		1449280	1012304	2065504	1836768	1668128		28985.6	20246.1	41310.1	36735.4	33362.6		1.43166	0.4901	1.1011		100884	82942.5	1.1644e+06
280		1527488	967280	2024640	1740608	1611808		30549.8	19345.6	40492.8	34812.2	32236.2		1.57916	0.477754	1.07991		-717586	1.55094e+06	153077
281		1499328	1010672	1988384	1727040	1609248		29986.6	20213.4	39767.7	34540.8	32185		1.4835	0.508288	1.0732		-21273.4	337448	270556
282		1494944	996224	2072128	1674144	1584896		29898.9	19924.5	41442.6	33482.9	31697.9		1.50061	0.480773	1.05631		-23745.8	251956	1.53439e+06
283		1484768	1049152	2113728	1805536	1615488		29695.4	20983	42274.6	36110.7	32309.8		1.41521	0.496351	1.11764		-92579.1	159898	-152569
284		1522304	1025584	2094176	1855232	1709664		30446.1	20511.7	41883.5	37104.6	34193.3		1.48433	0.489732	1.08514		89100.4	-19700.8	2.92434e+06
285		1580352	988432	2142592	1778208	1664160		31607	19768.6	42851.8	35564.2	33283.2		1.59885	0.461325	1.06853		-1.04829e+06	-496927	154504
286		1499904	1055904	2081216	1821952	1644064		29998.1	21118.1	41624.3	36439	32881.3		1.42049	0.50735	1.1082		115669	-295909	395203
287		1519328	1032016	2127680	1840608	1601280		30386.6	20640.3	42553.6	36812.2	32025.6		1.47219	0.485043	1.14946		149974	148690	-707459
288		1519424	1014464	2066528	1779840	1704192		30388.5	20289.3	41330.6	35596.8	34083.8		1.49776	0.490903	1.04439		-40351.3	50906.5	366545
289		1571264	1003824	2096992	1801600	1567776		31425.3	20076.5	41939.8	36032	31355.5		1.56528	0.478697	1.14914		-453628	21994	-774577
290		1525632	1039872	2103296	1777280	1704576		30512.6	20797.4	42065.9	35545.6	34091.5		1.46713	0.494401	1.04265		289808	21458.7	287564
291		1485568	948000	2067200	1712352	1617920		29711.4	18960	41344	34247	32358.4		1.56705	0.458591	1.05837		187271	943809	173576
292		1509664	1045904	2072896	1670400	1583808		30193.3	20918.1	41457.9	33408	31676.2		1.44341	0.504562	1.05467		193266	-309762	1.63804e+06
293		1511552	1012608	2135552	1637728	1578816		30231	20252.2	42711	32754.6	31576.3		1.49273	0.474167	1.03731		-43004	-77331.8	2.44591e+06
294		1474304	1024896	2118080	1743008	1611360		29486.1	20497.9	42361.6	34860.2	32227.2		1.43849	0.48388	1.0817		-48218.9	46393.3	144254
295		1436448	982800	1917152	1840512	1680128		28729	19656	38343	36810.2	33602.6		1.46159	0.512635	1.09546		789448	2.59894e+06	1.57521e+06
296		1474304	1021472	2147520	1775104	1702432		29486.1	20429.4	42950.4	35502.1	34048.6		1.44331	0.475652	1.04269		-23654.3	61585.6	212956
297		1500128	1046160	2145408	1749952	1591712		30002.6	20923.2	42908.2	34999	31834.2		1.43394	0.487628	1.09941		88303.4	499081	247587
298		1518560	1073248	2048832	1798912	1656704		30371.2	21465	40976.6	35978.2	33134.1		1.41492	0.523834	1.08584		579819	-1.14533e+06	381362
299		1474208	962720	2076448	1782144	1681888		29484.2	19254.4	41529	35642.9	33637.8		1.53129	0.463638	1.05961		399975	540695	314184
300		1474112	1004448	2099008	1745696	1607680		29482.2	20089	41980.2	34913.9	32153.6		1.46758	0.478535	1.08585		99534	9968.28	161918
mean		1.49224e+06	1.01817e+06	2.10082e+06	1.76817e+06	1.62569e+06		29844.8	20363.5	42016.5	35363.3	32513.9		1.46631	0.484915	1.08825		133717	175189	318831
full stdv = s(N)								808.911	538.401	1142.51	958.101	940.836
Poisson stdv								172.756	142.701	204.979	188.051	180.316
full variance = Var(N)								654338	289876	1.30533e+06	917957	885172
Poisson variance								29844.8	20363.5	42016.5	35363.3	32513.9
excess variance								624493	269512	1.26331e+06	882594	852658
measured count ratio									1.4656	0.484655		1.08764
ratio of excess standard deviations, s(Mx)/s(My)									1.52221	0.461885		1.0174
reference ratio of natural isotope abundances									1.47	0.48		1.08
ratio stdv according to f-la (22), for single sweep									0.0461985	0.0155463		0.0346812
according to f-la (22), for single sweep									3.15219	3.20771		3.18867
same, for the whole signal									0.181992	0.185197		0.184098
according to f-la (27), for single sweep									3.27994	3.31856		3.27475
same, for the whole signal									0.189367	0.191597		0.189068
minimum RSD% according f-la (25), for single sweep									0.908923	0.85386		0.768336
same, for the whole signal									0.0524767	0.0492976		0.0443599
Pearson's r																		0.307029	0.284801	0.353701
ratio stdv according to f-la (28), for single sweep														0.0464552	0.0156383	0.0347248
according to f-la (28), for single sweep														3.16818	3.22495	3.1909
same, for the whole signal														0.182915	0.186193	0.184227
		143Nd	145Nd	146Nd	147Sm	149Sm		143Nd	145Nd	146Nd	147Sm	149Sm		143Nd/145Nd	145Nd/146Nd	147Sm/149Sm		143Nd,145Nd	145Nd,146Nd	147Sm,149Sm
