# Supplementary material for: The ICPMS signal as a Poisson process: a review of basic concepts
Source: Royal Society of Chemistry journal article supplement (doi:10.1039/c4ja00319e), 2014-12-15
Supplement: c4ja00319e5.xlsx [file c4ja00319e5.xlsx]

## Sheet: Feuil1
			Electronic Appendix 5
droplet diameter	5	10	mm
droplet volume	65.4498	523.599	mm3
droplet density	1	1	g/cm3
droplet density	1e-12	1e-12	g/mm3
droplet mass (total)	6.54498e-11	5.23599e-10	g
element content (Nd)	10	10	ng/g
isotope content (143Nd)	1.22	1.22	ng/g
isotope mass	7.98488e-11	6.3879e-10	ng
	7.98488e-20	6.3879e-19	g
molar mass (143Nd)	142.91	142.91	g/mol
mol	5.58736e-22	4.46989e-21	mol
N Avogadro	6.022e+23	6.022e+23	mol-1
c* (atoms in one droplet)	336.471	2691.77
ion transmission efficency (p)	0.0001	0.0001
excess variance
p2Var(M)≈p2(c*)2N* atoms=p2c*M=pc*N	0.0336471	0.269177	fraction of N
