# Supplementary material for: The ICPMS signal as a Poisson process: a review of basic concepts
Source: Royal Society of Chemistry journal article supplement (doi:10.1039/c4ja00319e), 2014-12-15
Supplement: c4ja00319e7.xlsx [file c4ja00319e7.xlsx]

## Sheet: Feuil1
																									Electronic Appendix 7
Test of independent parallel sample introduction systems (two representative replicae). ICPMS data were obtained by the analysis of a ~10 ng/g Ba-Ce solution using an Element XR sector field ICPMS.
1st replica																														2st replica
	1st nebuliser / spray chamber									2nd nebuliser / spray chamber									1st and 2nd nebulisers / spray chambers running simultaneously in parallel												1st nebuliser / spray chamber									2nd nebuliser / spray chamber									1st and 2nd nebulisers / spray chambers running simultaneously in parallel
Sweep	Intensities, cps				Counts				Sweep	Intensities, cps				Counts				Sweep	Intensities, cps				Counts							Sweep	Intensities, cps				Counts				Sweep	Intensities, cps				Counts				Sweep	Intensities, cps
number	135Ba	137Ba	142Ce		135Ba	137Ba	142Ce		number	135Ba	137Ba	142Ce		135Ba	137Ba	142Ce		number	135Ba	137Ba	142Ce		135Ba	137Ba	142Ce					number	135Ba	137Ba	142Ce		135Ba	137Ba	142Ce		number	135Ba	137Ba	142Ce		135Ba	137Ba	142Ce		number	135Ba
1	289320	522360	500736		5786.4	10447.2	10014.7		1	190112	335920	337040		3802.24	6718.4	6740.8		1	482336	846480	811024		9646.72	16929.6	16220.5					1	285592	461384	494584		5711.84	9227.68	9891.68		1	185844	333768	332336		3716.88	6675.36	6646.72		1	478104
2	297240	487552	466024		5944.8	9751.04	9320.48		2	203472	352928	342168		4069.44	7058.56	6843.36		2	520912	852960	746096		10418.2	17059.2	14921.9					2	294888	474592	480480		5897.76	9491.84	9609.6		2	193308	336328	324448		3866.16	6726.56	6488.96		2	486832
3	308744	500472	485384		6174.88	10009.4	9707.68		3	200932	353904	343496		4018.64	7078.08	6869.92		3	498096	884688	830928		9961.92	17693.8	16618.6					3	289120	471960	502128		5782.4	9439.2	10042.6		3	205656	353080	340272		4113.12	7061.6	6805.44		3	481616
4	306392	505856	460144		6127.84	10117.1	9202.88		4	206928	368568	337504		4138.56	7371.36	6750.08		4	488120	901600	855120		9762.4	18032	17102.4					4	297552	481664	445400		5951.04	9633.28	8908		4	210284	314832	339504		4205.68	6296.64	6790.08		4	478312
5	292896	534672	486368		5857.92	10693.4	9727.36		5	213792	346320	336736		4275.84	6926.4	6734.72		5	475008	839408	824192		9500.16	16788.2	16483.8					5	288712	451432	474744		5774.24	9028.64	9494.88		5	198848	349600	305216		3976.96	6992	6104.32		5	464064
6	305520	514288	478256		6110.4	10285.8	9565.12		6	206116	350520	350568		4122.32	7010.4	7011.36		6	508232	889232	823872		10164.6	17784.6	16477.4					6	294480	513872	461128		5889.6	10277.4	9222.56		6	211656	346320	309872		4233.12	6926.4	6197.44		6	492672
7	292800	479656	498048		5856	9593.12	9960.96		7	190772	353496	350672		3815.44	7069.92	7013.44		7	482232	859984	870800		9644.64	17199.7	17416					7	259368	475112	486472		5187.36	9502.24	9729.44		7	200728	349752	343704		4014.56	6995.04	6874.08		7	492776
8	280792	492672	467472		5615.84	9853.44	9349.44		8	206168	381864	336944		4123.36	7637.28	6738.88		8	519928	890240	863664		10398.6	17804.8	17273.3					8	278904	500320	456840		5578.08	10006.4	9136.8		8	195800	341448	312632		3916	6828.96	6252.64		8	493496
9	280080	516824	483064		5601.6	10336.5	9661.28		9	213588	356008	353648		4271.76	7120.16	7072.96		9	504872	849584	892304		10097.4	16991.7	17846.1					9	280232	512008	467624		5604.64	10240.2	9352.48		9	205252	333456	345960		4105.04	6669.12	6919.2		9	507976
10	288816	498872	484872		5776.32	9977.44	9697.44		10	216792	364720	323424		4335.84	7294.4	6468.48		10	541984	830144	842208		10839.7	16602.9	16844.2					10	296224	474648	481560		5924.48	9492.96	9631.2		10	201388	354312	346216		4027.76	7086.24	6924.32		10	471808
11	278960	496440	512472		5579.2	9928.8	10249.4		11	196560	342112	325112		3931.2	6842.24	6502.24		11	503216	809440	820032		10064.3	16188.8	16400.6					11	303224	484560	475880		6064.48	9691.2	9517.6		11	189400	354160	364520		3788	7083.2	7290.4		11	480120
12	288400	494424	488848		5768	9888.48	9776.96		12	205200	351392	334944		4104	7027.84	6698.88		12	516720	938832	857504		10334.4	18776.6	17150.1					12	289680	500216	465768		5793.6	10004.3	9315.36		12	205608	345904	325424		4112.16	6918.08	6508.48		12	483576
13	268392	466848	491944		5367.84	9336.96	9838.88		13	206168	362520	349544		4123.36	7250.4	6990.88		13	510872	855808	799552		10217.4	17116.2	15991					13	274672	494992	476608		5493.44	9899.84	9532.16		13	200576	358312	327520		4011.52	7166.24	6550.4		13	523344
14	286568	480632	476296		5731.36	9612.64	9525.92		14	196868	354264	364824		3937.36	7085.28	7296.48		14	501200	891776	833136		10024	17835.5	16662.7					14	283856	494272	460920		5677.12	9885.44	9218.4		14	190312	345496	341808		3806.24	6909.92	6836.16		14	493600
15	264264	488536	498352		5285.28	9770.72	9967.04		15	205860	339608	328136		4117.2	6792.16	6562.72		15	490552	898704	775440		9811.04	17974.1	15508.8					15	286720	487552	468088		5734.4	9751.04	9361.76		15	194936	344064	338480		3898.72	6881.28	6769.6		15	535824
16	287992	525824	464320		5759.84	10516.5	9286.4		16	202352	354208	338424		4047.04	7084.16	6768.48		16	520336	872592	867104		10406.7	17451.8	17342.1					16	291520	490088	477848		5830.4	9801.76	9556.96		16	203728	356160	334024		4074.56	7123.2	6680.48		16	484976
17	285032	503216	482856		5700.64	10064.3	9657.12		17	215520	363440	354520		4310.4	7268.8	7090.4		17	522928	830192	800496		10458.6	16603.8	16009.9					17	275488	472272	475728		5509.76	9445.44	9514.56		17	207388	338120	327008		4147.76	6762.4	6540.16		17	520544
18	304088	491744	504248		6081.76	9834.88	10085		18	207184	368264	330848		4143.68	7365.28	6616.96		18	495464	908160	857808		9909.28	18163.2	17156.2					18	301328	486832	464632		6026.56	9736.64	9292.64		18	187268	352928	339248		3745.36	7058.56	6784.96		18	499128
19	258604	507200	522360		5172.08	10144	10447.2		19	195952	352264	318312		3919.04	7045.28	6366.24		19	490032	874448	800976		9800.64	17489	16019.5					19	264720	454216	493912		5294.4	9084.32	9878.24		19	204640	318056	333872		4092.8	6361.12	6677.44		19	508904
20	303832	503424	446944		6076.64	10068.5	8938.88		20	191684	359592	335920		3833.68	7191.84	6718.4		20	517904	852064	850160		10358.1	17041.3	17003.2					20	276048	498720	466024		5520.96	9974.4	9320.48		20	196256	363648	349648		3925.12	7272.96	6992.96		20	475936
21	277576	484504	494528		5551.52	9690.08	9890.56		21	189908	354976	343296		3798.16	7099.52	6865.92		21	482752	872864	814608		9655.04	17457.3	16292.2					21	279928	477848	467984		5598.56	9556.96	9359.68		21	202152	333256	323576		4043.04	6665.12	6471.52		21	509784
22	298008	521688	470208		5960.16	10433.8	9404.16		22	199660	351032	327984		3993.2	7020.64	6559.68		22	501976	887760	873072		10039.5	17755.2	17461.4					22	300208	493184	484816		6004.16	9863.68	9696.32		22	186860	348312	317744		3737.2	6966.24	6354.88		22	485440
23	265536	510608	490760		5310.72	10212.2	9815.2		23	203216	334536	337352		4064.32	6690.72	6747.04		23	511592	869584	817504		10231.8	17391.7	16350.1					23	280232	497584	459784		5604.64	9951.68	9195.68		23	192700	358264	319176		3854	7165.28	6383.52		23	520136
24	301896	504920	450040		6037.92	10098.4	9000.8		24	208760	360520	345960		4175.2	7210.4	6919.2		24	512056	853280	842576		10241.1	17065.6	16851.5					24	283760	503632	479392		5675.2	10072.6	9587.84		24	202456	321432	318000		4049.12	6428.64	6360		24	451272
25	293152	480632	483112		5863.04	9612.64	9662.24		25	198288	349344	345808		3965.76	6986.88	6916.16		25	521792	876976	793248		10435.8	17539.5	15865					25	290392	474080	482128		5807.84	9481.6	9642.56		25	200780	358104	334944		4015.6	7162.08	6698.88		25	495464
26	286976	527792	489624		5739.52	10555.8	9792.48		26	216080	344520	336328		4321.6	6890.4	6726.56		26	510200	873696	903568		10204	17473.9	18071.4					26	289272	521792	457000		5785.44	10435.8	9140		26	198592	349904	337352		3971.84	6998.08	6747.04		26	485128
27	280032	455192	491272		5600.64	9103.84	9825.44		27	198036	350312	329976		3960.72	7006.24	6599.52		27	521064	836880	823808		10421.3	16737.6	16476.2					27	274928	503472	494792		5498.56	10069.4	9895.84		27	194324	344264	322040		3886.48	6885.28	6440.8		27	499440
28	286616	495616	463184		5732.32	9912.32	9263.68		28	203472	365696	323424		4069.44	7313.92	6468.48		28	504352	887008	929296		10087	17740.2	18585.9					28	297904	476968	483424		5958.08	9539.36	9668.48		28	185844	336688	317896		3716.88	6733.76	6357.92		28	492824
29	289784	523656	483216		5795.68	10473.1	9664.32		29	199256	337760	326544		3985.12	6755.2	6530.88		29	499960	882000	807664		9999.2	17640	16153.3					29	293464	507768	477952		5869.28	10155.4	9559.04		29	201084	344368	305520		4021.68	6887.36	6110.4		29	495824
30	289480	495976	501096		5789.6	9919.52	10021.9		30	210640	361648	335248		4212.8	7232.96	6704.96		30	505800	887536	835408		10116	17750.7	16708.2					30	277784	505440	474024		5555.68	10108.8	9480.48		30	191736	340064	325064		3834.72	6801.28	6501.28		30	477072
31	285392	482080	486520		5707.84	9641.6	9730.4		31	194072	354568	348520		3881.44	7091.36	6970.4		31	497680	829552	829136		9953.6	16591	16582.7					31	291264	486264	485592		5825.28	9725.28	9711.84		31	196104	346416	319536		3922.08	6928.32	6390.72		31	507040
32	289632	515944	473616		5792.64	10318.9	9472.32		32	203268	352264	352984		4065.36	7045.28	7059.68		32	496440	864144	851376		9928.8	17282.9	17027.5					32	284984	489000	450240		5699.68	9780	9004.8		32	200980	349648	332176		4019.6	6992.96	6643.52		32	486680
33	283144	510712	503840		5662.88	10214.2	10076.8		33	202708	336736	349752		4054.16	6734.72	6995.04		33	533184	819872	793248		10663.7	16397.4	15865					33	302968	486264	459008		6059.36	9725.28	9180.16		33	198236	321024	342936		3964.72	6420.48	6858.72		33	504304
34	302912	496032	508280		6058.24	9920.64	10165.6		34	206268	338272	309616		4125.36	6765.44	6192.32		34	493392	824816	826240		9867.84	16496.3	16524.8					34	294024	486472	485232		5880.48	9729.44	9704.64		34	190668	339608	329312		3813.36	6792.16	6586.24		34	521792
35	273600	489832	488072		5472	9796.64	9761.44		35	193412	347752	342984		3868.24	6955.04	6859.68		35	518064	831296	801184		10361.3	16625.9	16023.7					35	286720	493704	471648		5734.4	9874.08	9432.96		35	204896	342424	344424		4097.92	6848.48	6888.48		35	487352
36	303224	502336	481360		6064.48	10046.7	9627.2		36	207740	360360	350472		4154.8	7207.2	7009.44		36	481664	827184	877712		9633.28	16543.7	17554.2					36	268240	490296	468552		5364.8	9805.92	9371.04		36	207944	347960	335712		4158.88	6959.2	6714.24		36	501456
37	278040	483888	480584		5560.8	9677.76	9611.68		37	194276	352312	338424		3885.52	7046.24	6768.48		37	512320	831344	817232		10246.4	16626.9	16344.6					37	293816	478880	450296		5876.32	9577.6	9005.92		37	194528	317848	337968		3890.56	6356.96	6759.36		37	489728
38	292184	518168	492928		5843.68	10363.4	9858.56		38	206368	341656	341504		4127.36	6833.12	6830.08		38	487864	855392	866208		9757.28	17107.8	17324.2					38	281360	520136	487656		5627.2	10402.7	9753.12		38	188332	332744	331208		3766.64	6654.88	6624.16		38	487296
39	278040	516720	470568		5560.8	10334.4	9411.36		39	204844	352416	340120		4096.88	7048.32	6802.4		39	519768	846112	805664		10395.4	16922.2	16113.3					39	287688	499696	476608		5753.76	9993.92	9532.16		39	202048	346368	354976		4040.96	6927.36	7099.52		39	522408
40	284880	495048	474544		5697.6	9900.96	9490.88		40	200320	377344	353544		4006.4	7546.88	7070.88		40	472840	853488	877344		9456.8	17069.8	17546.9					40	273040	503784	463088		5460.8	10075.7	9261.76		40	188840	342320	333104		3776.8	6846.4	6662.08		40	494584
41	281712	487864	492720		5634.24	9757.28	9854.4		41	212724	343448	335816		4254.48	6868.96	6716.32		41	521944	866048	818336		10438.9	17321	16366.7					41	298568	501248	497168		5971.36	10025	9943.36		41	202964	341912	333304		4059.28	6838.24	6666.08		41	505336
42	298776	536960	460864		5975.52	10739.2	9217.28		42	219440	352464	346216		4388.8	7049.28	6924.32		42	514960	874704	872592		10299.2	17494.1	17451.8					42	293208	475008	479240		5864.16	9500.16	9584.8		42	184676	335968	330800		3693.52	6719.36	6616		42	470048
43	276456	488224	485744		5529.12	9764.48	9714.88		43	206624	341192	331824		4132.48	6823.84	6636.48		43	516096	895264	850064		10321.9	17905.3	17001.3					43	283352	488176	489928		5667.04	9763.52	9798.56		43	194276	342320	323016		3885.52	6846.4	6460.32		43	486312
44	278448	517336	459832		5568.96	10346.7	9196.64		44	215116	344728	345808		4302.32	6894.56	6916.16		44	450552	866784	879664		9011.04	17335.7	17593.3					44	302656	484200	471704		6053.12	9684	9434.08		44	190264	360624	316624		3805.28	7212.48	6332.48		44	492880
45	285392	474592	477384		5707.84	9491.84	9547.68		45	206268	346320	335456		4125.36	6926.4	6709.12		45	522672	865680	816448		10453.4	17313.6	16329					45	287280	500472	462256		5745.6	10009.4	9245.12		45	187316	362312	326856		3746.32	7246.24	6537.12		45	517696
46	283856	505648	480272		5677.12	10113	9605.44		46	211096	340832	337760		4221.92	6816.64	6755.2		46	501976	836720	870224		10039.5	16734.4	17404.5					46	290552	462056	484816		5811.04	9241.12	9696.32		46	193156	326800	330744		3863.12	6536	6614.88		46	461592
47	290648	470824	449056		5812.96	9416.48	8981.12		47	210436	371600	323936		4208.72	7432	6478.72		47	532096	904576	855120		10641.9	18091.5	17102.4					47	286312	509784	470208		5726.24	10195.7	9404.16		47	194428	345192	317592		3888.56	6903.84	6351.84		47	505696
48	276200	479552	482288		5524	9591.04	9645.76		48	210640	365752	348112		4212.8	7315.04	6962.24		48	481664	894000	808448		9633.28	17880	16169					48	287536	493392	498560		5750.72	9867.84	9971.2		48	204640	324552	330080		4092.8	6491.04	6601.6		48	468712
49	274208	496184	431336		5484.16	9923.68	8626.72		49	206676	340680	346416		4133.52	6813.6	6928.32		49	536592	896048	823392		10731.8	17921	16467.8					49	280640	472840	499904		5612.8	9456.8	9998.08		49	196256	350264	325264		3925.12	7005.28	6505.28		49	493752
50	291824	517960	473560		5836.48	10359.2	9471.2		50	201336	349496	326240		4026.72	6989.92	6524.8		50	499544	831296	788832		9990.88	16625.9	15776.6					50	285240	477016	466544		5704.8	9540.32	9330.88		50	198744	352928	325168		3974.88	7058.56	6503.36		50	462104
51	283856	453800	502392		5677.12	9076	10047.8		51	190008	333616	326344		3800.16	6672.32	6526.88		51	521216	893728	880992		10424.3	17874.6	17619.8					51	280488	495824	448288		5609.76	9916.48	8965.76		51	193464	332176	325008		3869.28	6643.52	6500.16		51	482496
52	282736	507608	474024		5654.72	10152.2	9480.48		52	207588	352880	342936		4151.76	7057.6	6858.72		52	493136	870640	854704		9862.72	17412.8	17094.1					52	290344	497320	485440		5806.88	9946.4	9708.8		52	198036	336272	317896		3960.72	6725.44	6357.92		52	473768
53	278496	486576	464840		5569.92	9731.52	9296.8		53	199100	347800	323424		3982	6956	6468.48		53	520336	878720	865472		10406.7	17574.4	17309.4					53	292640	480016	471704		5852.8	9600.32	9434.08		53	192040	352624	333200		3840.8	7052.48	6664		53	519456
54	288248	514080	479184		5764.96	10281.6	9583.68		54	206012	357336	345600		4120.24	7146.72	6912		54	501816	804128	858864		10036.3	16082.6	17177.3					54	269312	478928	487816		5386.24	9578.56	9756.32		54	195596	362008	318256		3911.92	7240.16	6365.12		54	510560
55	278192	456744	494632		5563.84	9134.88	9892.64		55	187876	347544	337504		3757.52	6950.88	6750.08		55	525984	899392	857968		10519.7	17987.8	17159.4					55	289888	462984	467264		5797.76	9259.68	9345.28		55	201288	349600	355904		4025.76	6992	7118.08		55	497584
56	297904	487352	493240		5958.08	9747.04	9864.8		56	210692	355544	342472		4213.84	7110.88	6849.44		56	486984	888752	834928		9739.68	17775	16698.6					56	298928	494584	492208		5978.56	9891.68	9844.16		56	196512	325520	330184		3930.24	6510.4	6603.68		56	489464
57	295144	482032	442824		5902.88	9640.64	8856.48		57	189804	340064	322144		3796.08	6801.28	6442.88		57	501248	873008	879456		10025	17460.2	17589.1					57	290960	492776	508856		5819.2	9855.52	10177.1		57	199456	340064	345752		3989.12	6801.28	6915.04		57	505592
58	293000	508904	516408		5860	10178.1	10328.2		58	207132	351856	343496		4142.64	7037.12	6869.92		58	495768	873488	833088		9915.36	17469.8	16661.8					58	285288	500992	488792		5705.76	10019.8	9775.84		58	201644	325008	330696		4032.88	6500.16	6613.92		58	483064
59	279264	481464	480792		5585.28	9629.28	9615.84		59	206572	348312	326800		4131.44	6966.24	6536		59	506008	871008	894208		10120.2	17420.2	17884.2					59	300208	502960	474592		6004.16	10059.2	9491.84		59	204436	329824	345192		4088.72	6596.48	6903.84		59	476192
60	302504	538000	490136		6050.08	10760	9802.72		60	200728	367032	340832		4014.56	7340.64	6816.64		60	482080	831184	849744		9641.6	16623.7	16994.9					60	275128	481304	482696		5502.56	9626.08	9653.92		60	211252	317080	331768		4225.04	6341.6	6635.36		60	469328
61	305216	478672	446272		6104.32	9573.44	8925.44		61	211860	327824	336840		4237.2	6556.48	6736.8		61	522976	818608	894256		10459.5	16372.2	17885.1					61	282584	496544	490504		5651.68	9930.88	9810.08		61	203980	314264	311560		4079.6	6285.28	6231.2		61	464168
62	286000	493912	484096		5720	9878.24	9681.92		62	191584	366056	348056		3831.68	7321.12	6961.12		62	506264	829872	813872		10125.3	16597.4	16277.4					62	279520	519928	465200		5590.4	10398.6	9304		62	204388	345752	309512		4087.76	6915.04	6190.24		62	465560
63	294328	470928	453904		5886.56	9418.56	9078.08		63	210944	345192	336224		4218.88	6903.84	6724.48		63	497376	890768	828864		9947.52	17815.4	16577.3					63	266352	503160	467680		5327.04	10063.2	9353.6		63	208608	356824	340936		4172.16	7136.48	6818.72		63	508440
64	278704	504768	496752		5574.08	10095.4	9935.04		64	196104	368416	338736		3922.08	7368.32	6774.72		64	495200	823344	798768		9904	16466.9	15975.4					64	297496	525152	461432		5949.92	10503	9228.64		64	194072	338072	319072		3881.44	6761.44	6381.44		64	479240
65	275280	482960	464016		5505.6	9659.2	9280.32		65	201084	361752	331056		4021.68	7235.04	6621.12		65	510040	833936	871008		10200.8	16678.7	17420.2					65	292392	486880	471344		5847.84	9737.6	9426.88		65	198544	337248	350728		3970.88	6744.96	7014.56		65	506472
66	291368	503888	474488		5827.36	10077.8	9489.76		66	195088	353592	366672		3901.76	7071.84	7333.44		66	484872	828864	838464		9697.44	16577.3	16769.3					66	270896	468400	471136		5417.92	9368	9422.72		66	203980	323224	313400		4079.6	6464.48	6268		66	511800
67	286976	476920	457672		5739.52	9538.4	9153.44		67	206320	319792	354264		4126.4	6395.84	7085.28		67	478312	891456	826816		9566.24	17829.1	16536.3					67	255748	463032	460968		5114.96	9260.64	9219.36		67	194832	332896	340936		3896.64	6657.92	6818.72		67	486112
68	281920	472320	498768		5638.4	9446.4	9975.36		68	201896	372368	344520		4037.92	7447.36	6890.4		68	508960	814400	819072		10179.2	16288	16381.4					68	287232	477016	469536		5744.64	9540.32	9390.72		68	201288	333872	310888		4025.76	6677.44	6217.76		68	479448
69	299800	490088	466128		5996	9801.76	9322.56		69	212420	329104	325216		4248.4	6582.08	6504.32		69	519616	832144	827296		10392.3	16642.9	16545.9					69	293560	465664	502288		5871.2	9313.28	10045.8		69	186808	348568	324856		3736.16	6971.36	6497.12		69	474952
70	287176	488536	503736		5743.52	9770.72	10074.7		70	202864	372160	341760		4057.28	7443.2	6835.2		70	491016	850640	816544		9820.32	17012.8	16330.9					70	291216	514288	499960		5824.32	10285.8	9999.2		70	207588	342112	324704		4151.76	6842.24	6494.08		70	490808
71	290344	515424	464784		5806.88	10308.5	9295.68		71	212320	373240	330232		4246.4	7464.8	6604.64		71	518944	857552	867312		10378.9	17151	17346.2					71	275432	475216	461536		5508.64	9504.32	9230.72		71	204436	352672	352416		4088.72	7053.44	7048.32		71	493752
72	283704	488592	481768		5674.08	9771.84	9635.36		72	199560	363904	344168		3991.2	7278.08	6883.36		72	534064	860976	812080		10681.3	17219.5	16241.6					72	273952	457000	483632		5479.04	9140	9672.64		72	202200	375088	331152		4044	7501.76	6623.04		72	495256
73	299392	489160	461280		5987.84	9783.2	9225.6		73	215676	349904	355336		4313.52	6998.08	7106.72		73	513352	921184	849584		10267	18423.7	16991.7					73	272528	493856	466280		5450.56	9877.12	9325.6		73	185744	349088	338584		3714.88	6981.76	6771.68		73	492568
74	277168	488848	477120		5543.36	9776.96	9542.4		74	202660	342528	349648		4053.2	6850.56	6992.96		74	491792	848848	864304		9835.84	16977	17286.1					74	300872	478152	491792		6017.44	9563.04	9835.84		74	195392	325880	312936		3907.84	6517.6	6258.72		74	519352
75	295552	486368	456536		5911.04	9727.36	9130.72		75	204640	356416	348776		4092.8	7128.32	6975.52		75	500576	888384	865152		10011.5	17767.7	17303					75	281408	481256	482392		5628.16	9625.12	9647.84		75	189804	348472	332848		3796.08	6969.44	6656.96		75	484976
76	292848	483368	492360		5856.96	9667.36	9847.2		76	203676	341760	349088		4073.52	6835.2	6981.76		76	482232	876864	818176		9644.64	17537.3	16363.5					76	283400	489672	474744		5668	9793.44	9494.88		76	220760	349032	320152		4415.2	6980.64	6403.04		76	490088
77	299744	476760	483368		5994.88	9535.2	9667.36		77	201540	349648	336272		4030.8	6992.96	6725.44		77	523184	868048	883104		10463.7	17361	17662.1					77	275592	509424	482600		5511.84	10188.5	9652		77	189044	358464	349288		3780.88	7169.28	6985.76		77	497736
78	272272	485952	505904		5445.44	9719.04	10118.1		78	197680	351080	357440		3953.6	7021.6	7148.8		78	499232	871904	807504		9984.64	17438.1	16150.1					78	289632	490032	469584		5792.64	9800.64	9391.68		78	210232	318976	325320		4204.64	6379.52	6506.4		78	483168
79	280488	494120	460296		5609.76	9882.4	9205.92		79	212776	361696	329776		4255.52	7233.92	6595.52		79	511128	879248	850528		10222.6	17585	17010.6					79	278448	487448	458288		5568.96	9748.96	9165.76		79	206168	330336	339296		4123.36	6606.72	6785.92		79	487448
80	284984	474848	481200		5699.68	9496.96	9624		80	188536	359136	350880		3770.72	7182.72	7017.6		80	516768	870000	823760		10335.4	17400	16475.2					80	283552	504560	454416		5671.04	10091.2	9088.32		80	204184	356568	331616		4083.68	7131.36	6632.32		80	485696
81	288152	492672	462928		5763.04	9853.44	9258.56		81	213132	357440	348056		4262.64	7148.8	6961.12		81	482696	934064	850000		9653.92	18681.3	17000					81	286360	464376	463448		5727.2	9287.52	9268.96		81	199508	339400	348368		3990.16	6788	6967.36		81	465768
82	285088	486264	498456		5701.76	9725.28	9969.12		82	199256	340736	350312		3985.12	6814.72	7006.24		82	502128	862832	830768		10042.6	17256.6	16615.4					82	270640	489728	456744		5412.8	9794.56	9134.88		82	193920	337456	326496		3878.4	6749.12	6529.92		82	516512
83	300360	534000	474848		6007.2	10680	9496.96		83	206472	326544	338680		4129.44	6530.88	6773.6		83	507200	825072	862192		10144	16501.4	17243.8					83	289680	483736	443752		5793.6	9674.72	8875.04		83	194324	346216	349904		3886.48	6924.32	6998.08		83	487552
84	273496	502544	482232		5469.92	10050.9	9644.64		84	206980	346520	345648		4139.6	6930.4	6912.96		84	517392	835456	796928		10347.8	16709.1	15938.6					84	271656	500888	470776		5433.12	10017.8	9415.52		84	199764	351648	318976		3995.28	7032.96	6379.52		84	487352
85	295912	480424	473920		5918.24	9608.48	9478.4		85	206980	357848	327672		4139.6	7156.96	6553.44		85	516040	896272	842000		10320.8	17925.4	16840					85	284368	474592	501248		5687.36	9491.84	10025		85	196308	328440	321376		3926.16	6568.8	6427.52		85	512056
86	300816	492312	483680		6016.32	9846.24	9673.6		86	195596	355592	358008		3911.92	7111.84	7160.16		86	497888	845472	806080		9957.76	16909.4	16121.6					86	294072	495464	493912		5881.44	9909.28	9878.24		86	207488	350160	344112		4149.76	7003.2	6882.24		86	479184
87	291416	492616	470672		5828.32	9852.32	9413.44		87	204896	352208	351592		4097.92	7044.16	7031.84		87	519664	845728	861248		10393.3	16914.6	17225					87	286104	498616	489672		5722.08	9972.32	9793.44		87	200628	335560	326600		4012.56	6711.2	6532		87	507712
88	291416	499752	480688		5828.32	9995.04	9613.76		88	194072	350520	347344		3881.44	7010.4	6946.88		88	483112	842784	815872		9662.24	16855.7	16317.4					88	299952	536384	497064		5999.04	10727.7	9941.28		88	201796	343296	351696		4035.92	6865.92	7033.92		88	496544
89	300256	494224	497112		6005.12	9884.48	9942.24		89	202456	375808	340064		4049.12	7516.16	6801.28		89	458288	850272	850160		9165.76	17005.4	17003.2					89	285032	489672	483008		5700.64	9793.44	9660.16		89	193868	350520	354720		3877.36	7010.4	7094.4		89	486784
90	269264	494736	499184		5385.28	9894.72	9983.68		90	192548	353184	346832		3850.96	7063.68	6936.64		90	521112	867472	846528		10422.2	17349.4	16930.6					90	291728	500112	479392		5834.56	10002.2	9587.84		90	202000	353032	327112		4040	7060.64	6542.24		90	490192
91	301128	504200	460296		6022.56	10084	9205.92		91	213132	355752	361800		4262.64	7115.04	7236		91	482336	891456	901920		9646.72	17829.1	18038.4					91	291112	509784	487864		5822.24	10195.7	9757.28		91	186504	333816	338784		3730.08	6676.32	6775.68		91	481872
92	272728	492720	480944		5454.56	9854.4	9618.88		92	196204	334944	362568		3924.08	6698.88	7251.36		92	502232	880192	819392		10044.6	17603.8	16387.8					92	293056	498152	486008		5861.12	9963.04	9720.16		92	190924	357136	323120		3818.48	7142.72	6462.4		92	510040
93	279368	490600	475680		5587.36	9812	9513.6		93	198340	372576	336736		3966.8	7451.52	6734.72		93	502232	870640	882848		10044.6	17412.8	17657					93	303072	500736	451840		6061.44	10014.7	9036.8		93	209724	342216	346880		4194.48	6844.32	6937.6		93	483992
94	308792	495720	450704		6175.84	9914.4	9014.08		94	202404	342272	342936		4048.08	6845.44	6858.72		94	510352	897008	857392		10207	17940.2	17147.8					94	294584	530224	493808		5891.68	10604.5	9876.16		94	213588	343344	326496		4271.76	6866.88	6529.92		94	502696
95	297808	517336	471392		5956.16	10346.7	9427.84		95	193664	367544	335816		3873.28	7350.88	6716.32		95	489056	884848	881888		9781.12	17697	17637.8					95	283912	500888	475056		5678.24	10017.8	9501.12		95	191888	332536	340016		3837.76	6650.72	6800.32		95	486472
96	287992	470152	477328		5759.84	9403.04	9546.56		96	188840	359544	352928		3776.8	7190.88	7058.56		96	511384	871488	887008		10227.7	17429.8	17740.2					96	275384	506936	499440		5507.68	10138.7	9988.8		96	208860	358464	322144		4177.2	7169.28	6442.88		96	528560
97	269264	449056	462256		5385.28	8981.12	9245.12		97	208300	336376	346472		4166	6727.52	6929.44		97	500008	901456	829616		10000.2	18029.1	16592.3					97	284624	493752	431384		5692.48	9875.04	8627.68		97	196156	351496	333152		3923.12	7029.92	6663.04		97	493600
98	288400	471184	464688		5768	9423.68	9293.76		98	208760	330896	338992		4175.2	6617.92	6779.84		98	520600	884736	836192		10412	17694.7	16723.8					98	270536	499336	493240		5410.72	9986.72	9864.8		98	197780	322504	319488		3955.6	6450.08	6389.76		98	465712
99	283096	499960	498512		5661.92	9999.2	9970.24		99	214656	357184	330696		4293.12	7143.68	6613.92		99	544368	913456	865200		10887.4	18269.1	17304					99	305216	497064	457768		6104.32	9941.28	9155.36		99	197884	328496	340680		3957.68	6569.92	6813.6		99	502960
100	286824	484456	496336		5736.48	9689.12	9926.72		100	194732	322968	356824		3894.64	6459.36	7136.48		100	504408	893936	838784		10088.2	17878.7	16775.7					100	288912	491224	487040		5778.24	9824.48	9740.8		100	199508	344936	323680		3990.16	6898.72	6473.6		100	493136
101	269872	508960	486832		5397.44	10179.2	9736.64		101	207896	358880	360824		4157.92	7177.6	7216.48		101	519720	886800	813184		10394.4	17736	16263.7					101	284520	505696	459368		5690.4	10113.9	9187.36		101	190464	324088	317592		3809.28	6481.76	6351.84		101	489000
102	286256	468144	491328		5725.12	9362.88	9826.56		102	219336	326960	333512		4386.72	6539.2	6670.24		102	548096	856752	859232		10961.9	17135	17184.6					102	281256	501304	461176		5625.12	10026.1	9223.52		102	204540	369648	335560		4090.8	7392.96	6711.2		102	480320
103	282224	492104	497480		5644.48	9842.08	9949.6		103	211808	371288	337248		4236.16	7425.76	6744.96		103	489264	895952	866208		9785.28	17919	17324.2					103	270176	500424	430976		5403.52	10008.5	8619.52		103	208504	356464	320864		4170.08	7129.28	6417.28		103	512528
104	294840	491376	483680		5896.8	9827.52	9673.6		104	214096	355440	337352		4281.92	7108.8	6747.04		104	520704	913040	845952		10414.1	18260.8	16919					104	284672	483168	473712		5693.44	9663.36	9474.24		104	204236	349856	323784		4084.72	6997.12	6475.68		104	491072
105	301232	504712	500368		6024.64	10094.2	10007.4		105	210692	370160	356624		4213.84	7403.2	7132.48		105	496032	917488	858704		9920.64	18349.8	17174.1					105	300560	487760	447616		6011.2	9755.2	8952.32		105	188688	334688	327824		3773.76	6693.76	6556.48		105	496136
106	283144	505184	486680		5662.88	10103.7	9733.6		106	194936	320512	335352		3898.72	6410.24	6707.04		106	480424	873120	839984		9608.48	17462.4	16799.7					106	289376	470568	475416		5787.52	9411.36	9508.32		106	205812	362568	351240		4116.24	7251.36	7024.8		106	498152
107	282584	513816	480584		5651.68	10276.3	9611.68		107	216996	355032	351240		4339.92	7100.64	7024.8		107	489208	901872	868160		9784.16	18037.4	17363.2					107	296680	470824	474024		5933.6	9416.48	9480.48		107	200932	333616	318360		4018.64	6672.32	6367.2		107	492720
108	279368	490032	508184		5587.36	9800.64	10163.7		108	202456	330128	320352		4049.12	6602.56	6407.04		108	501408	863408	847424		10028.2	17268.2	16948.5					108	292392	487864	505080		5847.84	9757.28	10101.6		108	213132	362008	341600		4262.64	7240.16	6832		108	479448
109	288304	464424	453440		5766.08	9288.48	9068.8		109	205456	354104	345088		4109.12	7082.08	6901.76		109	481872	898544	810496		9637.44	17970.9	16209.9					109	294584	490504	482752		5891.68	9810.08	9655.04		109	198084	339912	324960		3961.68	6798.24	6499.2		109	494632
110	289224	475368	494528		5784.48	9507.36	9890.56		110	199508	357800	337456		3990.16	7156	6749.12		110	539232	894304	864784		10784.6	17886.1	17295.7					110	281408	508800	494064		5628.16	10176	9881.28		110	214300	344424	346776		4286	6888.48	6935.52		110	502856
111	308640	469744	485232		6172.8	9394.88	9704.64		111	205100	352568	323168		4102	7051.36	6463.36		111	506424	858448	885424		10128.5	17169	17708.5					111	294840	491432	474648		5896.8	9828.64	9492.96		111	193156	331312	339760		3863.12	6626.24	6795.2		111	503112
112	278448	511440	497216		5568.96	10228.8	9944.32		112	196004	320864	314832		3920.08	6417.28	6296.64		112	524896	825072	835568		10497.9	16501.4	16711.4					112	290600	509424	486624		5812	10188.5	9732.48		112	214404	368728	341656		4288.08	7374.56	6833.12		112	507304
113	307208	503264	466128		6144.16	10065.3	9322.56		113	202964	369136	348416		4059.28	7382.72	6968.32		113	507504	865776	870752		10150.1	17315.5	17415					113	287688	503528	451016		5753.76	10070.6	9020.32		113	206572	328336	328800		4131.44	6566.72	6576		113	498256
114	290496	471960	492256		5809.92	9439.2	9845.12		114	209268	319328	339608		4185.36	6386.56	6792.16		114	516560	915264	776848		10331.2	18305.3	15537					114	286568	504608	489520		5731.36	10092.2	9790.4		114	197324	364008	331920		3946.48	7280.16	6638.4		114	510304
115	276000	493136	484920		5520	9862.72	9698.4		115	213640	363848	340528		4272.8	7276.96	6810.56		115	484976	888976	874608		9699.52	17779.5	17492.2					115	316976	492776	477584		6339.52	9855.52	9551.68		115	179752	343752	336328		3595.04	6875.04	6726.56		115	504872
116	275080	479136	468760		5501.6	9582.72	9375.2		116	192804	340680	320000		3856.08	6813.6	6400		116	520912	875072	792256		10418.2	17501.4	15845.1					116	303224	505696	501352		6064.48	10113.9	10027		116	209472	354624	327728		4189.44	7092.48	6554.56		116	521168
117	293464	493184	448384		5869.28	9863.68	8967.68		117	202964	353592	336688		4059.28	7071.84	6733.76		117	496960	898336	892624		9939.2	17966.7	17852.5					117	292440	512680	498304		5848.8	10253.6	9966.08		117	206168	333968	321280		4123.36	6679.36	6425.6		117	512216
118	271712	513352	524528		5434.24	10267	10490.6		118	198036	343808	324248		3960.72	6876.16	6484.96		118	496392	870320	826816		9927.84	17406.4	16536.3					118	290496	481200	477584		5809.92	9624	9551.68		118	207184	343808	336888		4143.68	6876.16	6737.76		118	463136
119	271968	491376	463184		5439.36	9827.52	9263.68		119	213640	352880	318360		4272.8	7057.6	6367.2		119	509632	844256	812496		10192.6	16885.1	16249.9					119	290448	483936	481464		5808.96	9678.72	9629.28		119	202708	309456	310840		4054.16	6189.12	6216.8		119	477384
120	294480	498768	481664		5889.6	9975.36	9633.28		120	189856	344576	337504		3797.12	6891.52	6750.08		120	494688	891456	828976		9893.76	17829.1	16579.5					120	271912	515840	446480		5438.24	10316.8	8929.6		120	198848	346520	339912		3976.96	6930.4	6798.24		120	527744
121	277680	473816	481200		5553.6	9476.32	9624		121	193308	367392	324296		3866.16	7347.84	6485.92		121	514592	877088	848688		10291.8	17541.8	16973.8					121	285848	493600	482856		5716.96	9872	9657.12		121	195596	319328	317440		3911.92	6386.56	6348.8		121	504712
122	284728	511024	487608		5694.56	10220.5	9752.16		122	210488	332536	327776		4209.76	6650.72	6555.52		122	490088	846848	852960		9801.76	16937	17059.2					122	290960	490968	510872		5819.2	9819.36	10217.4		122	184728	354568	353240		3694.56	7091.36	7064.8		122	502648
123	280544	496544	487920		5610.88	9930.88	9758.4		123	196816	354776	362928		3936.32	7095.52	7258.56		123	489312	857600	853120		9786.24	17152	17062.4					123	292640	487192	464688		5852.8	9743.84	9293.76		123	187164	345192	335096		3743.28	6903.84	6701.92		123	489880
124	282736	503320	472272		5654.72	10066.4	9445.44		124	196916	342528	343448		3938.32	6850.56	6868.96		124	460968	903616	808080		9219.36	18072.3	16161.6					124	277680	479656	484872		5553.6	9593.12	9697.44		124	179092	361648	324088		3581.84	7232.96	6481.76		124	494328
125	291416	530848	487760		5828.32	10617	9755.2		125	188740	338016	334072		3774.8	6760.32	6681.44		125	509056	876032	861456		10181.1	17520.6	17229.1					125	288152	499232	461280		5763.04	9984.64	9225.6		125	202404	311504	324704		4048.08	6230.08	6494.08		125	486728
126	282584	481304	465096		5651.68	9626.08	9301.92		126	207740	339504	348880		4154.8	6790.08	6977.6		126	500216	916160	839936		10004.3	18323.2	16798.7					126	261716	487192	482184		5234.32	9743.84	9643.68		126	195952	344936	348472		3919.04	6898.72	6969.44		126	474648
127	299592	503936	494584		5991.84	10078.7	9891.68		127	215012	331208	344776		4300.24	6624.16	6895.52		127	521944	872800	822864		10438.9	17456	16457.3					127	291416	490032	509728		5828.32	9800.64	10194.6		127	189296	338480	332848		3785.92	6769.6	6656.96		127	477120
128	292336	502544	494992		5846.72	10050.9	9899.84		128	197528	354672	333048		3950.56	7093.44	6660.96		128	500008	872336	802240		10000.2	17446.7	16044.8					128	268344	485384	494328		5366.88	9707.68	9886.56		128	200880	362880	343656		4017.6	7257.6	6873.12		128	512528
129	280744	499440	497840		5614.88	9988.8	9956.8		129	201896	357904	359184		4037.92	7158.08	7183.68		129	493912	918960	799024		9878.24	18379.2	15980.5					129	294176	506992	468968		5883.52	10139.8	9379.36		129	199256	350008	311304		3985.12	7000.16	6226.08		129	500320
130	290648	480272	498720		5812.96	9605.44	9974.4		130	200628	344216	330440		4012.56	6884.32	6608.8		130	506368	861040	875440		10127.4	17220.8	17508.8					130	285336	479552	497168		5706.72	9591.04	9943.36		130	184628	338328	339760		3692.56	6766.56	6795.2		130	491120
131	290088	519352	487552		5801.76	10387	9751.04		131	192092	338936	352416		3841.84	6778.72	7048.32		131	506680	879408	905152		10133.6	17588.2	18103					131	288912	522928	480584		5778.24	10458.6	9611.68		131	187776	328496	340736		3755.52	6569.92	6814.72		131	495928
132	293104	509056	474696		5862.08	10181.1	9493.92		132	208404	334992	330336		4168.08	6699.84	6606.72		132	514960	878032	833504		10299.2	17560.6	16670.1					132	296424	494224	492928		5928.48	9884.48	9858.56		132	205708	371704	347496		4114.16	7434.08	6949.92		132	497480
133	292440	471752	464480		5848.8	9435.04	9289.6		133	183104	345240	354568		3662.08	6904.8	7091.36		133	502392	760480	834240		10047.8	15209.6	16684.8					133	278296	509936	496704		5565.92	10198.7	9934.08		133	198696	340680	317440		3973.92	6813.6	6348.8		133	492208
134	303224	473144	483680		6064.48	9462.88	9673.6		134	212164	336944	344728		4243.28	6738.88	6894.56		134	522872	883840	836880		10457.4	17676.8	16737.6					134	290496	502592	480896		5809.92	10051.8	9617.92		134	189296	345240	329776		3785.92	6904.8	6595.52		134	491944
135	289832	473872	480896		5796.64	9477.44	9617.92		135	211608	344320	362360		4232.16	6886.4	7247.2		135	496648	891872	860400		9932.96	17837.4	17208					135	293720	514592	499336		5874.4	10291.8	9986.72		135	208708	324808	323576		4174.16	6496.16	6471.52		135	517080
136	280080	492720	474080		5601.6	9854.4	9481.6		136	199712	348264	351336		3994.24	6965.28	7026.72		136	532288	839888	836400		10645.8	16797.8	16728					136	293208	468760	485592		5864.16	9375.2	9711.84		136	191632	328136	314728		3832.64	6562.72	6294.56		136	519048
137	285392	476816	456176		5707.84	9536.32	9123.52		137	195800	345136	344216		3916	6902.72	6884.32		137	478104	817920	863456		9562.08	16358.4	17269.1					137	307520	475936	495512		6150.4	9518.72	9910.24		137	204132	315240	312632		4082.64	6304.8	6252.64		137	502336
138	293000	495976	502232		5860	9919.52	10044.6		138	205504	325320	347856		4110.08	6506.4	6957.12		138	495512	897056	846208		9910.24	17941.1	16924.2					138	265280	487968	486008		5305.6	9759.36	9720.16		138	191888	359288	318976		3837.76	7185.76	6379.52		138	491744
139	280232	480320	480064		5604.64	9606.4	9601.28		139	198492	355080	335560		3969.84	7101.6	6711.2		139	471136	849376	841200		9422.72	16987.5	16824					139	302560	506736	492880		6051.2	10134.7	9857.6		139	207284	335760	323992		4145.68	6715.2	6479.84		139	500840
140	290552	490656	488896		5811.04	9813.12	9777.92		140	208048	329056	336432		4160.96	6581.12	6728.64		140	502080	848736	849424		10041.6	16974.7	16988.5					140	287176	467416	488328		5743.52	9348.32	9766.56		140	187012	315904	341600		3740.24	6318.08	6832		140	496392
141	285752	487352	465352		5715.04	9747.04	9307.04		141	196204	351696	327056		3924.08	7033.92	6541.12		141	465920	838464	835408		9318.4	16769.3	16708.2					141	284368	505856	496032		5687.36	10117.1	9920.64		141	194988	347088	316976		3899.76	6941.76	6339.52		141	502128
142	296832	486160	477328		5936.64	9723.2	9546.56		142	204896	342168	336888		4097.92	6843.36	6737.76		142	507040	880992	832304		10140.8	17619.8	16646.1					142	266912	482696	474952		5338.24	9653.92	9499.04		142	194784	349240	351648		3895.68	6984.8	7032.96		142	490552
143	291472	498256	477176		5829.44	9965.12	9543.52		143	200116	339912	334176		4002.32	6798.24	6683.52		143	504608	872752	841568		10092.2	17455	16831.4					143	301232	502392	482600		6024.64	10047.8	9652		143	197884	329824	317848		3957.68	6596.48	6356.96		143	461224
144	283656	505592	475984		5673.12	10111.8	9519.68		144	210384	344832	348832		4207.68	6896.64	6976.64		144	518008	946512	834768		10360.2	18930.2	16695.4					144	264928	478048	461688		5298.56	9560.96	9233.76		144	194224	344576	352160		3884.48	6891.52	7043.2		144	521272
145	318816	470976	475416		6376.32	9419.52	9508.32		145	197424	340064	338480		3948.48	6801.28	6769.6		145	499184	871488	823184		9983.68	17429.8	16463.7					145	285392	494688	488640		5707.84	9893.76	9772.8		145	206116	344168	319584		4122.32	6883.36	6391.68		145	490032
146	302200	501040	467728		6044	10020.8	9354.56		146	216080	364672	338328		4321.6	7293.44	6766.56		146	510304	848576	782944		10206.1	16971.5	15658.9					146	301584	484456	483216		6031.68	9689.12	9664.32		146	195188	344984	355336		3903.76	6899.68	7106.72		146	491896
147	297496	475160	481616		5949.92	9503.2	9632.32		147	220964	354776	334384		4419.28	7095.52	6687.68		147	512424	860240	820032		10248.5	17204.8	16400.6					147	292288	517960	478880		5845.76	10359.2	9577.6		147	199100	349344	323528		3982	6986.88	6470.56		147	487296
148	282176	475728	477120		5643.52	9514.56	9542.4		148	218880	346064	319584		4377.6	6921.28	6391.68		148	505488	871280	864416		10109.8	17425.6	17288.3					148	275792	497888	458544		5515.84	9957.76	9170.88		148	206876	324400	348312		4137.52	6488	6966.24		148	517024
149	299288	505336	477072		5985.76	10106.7	9541.44		149	214656	349344	360008		4293.12	6986.88	7200.16		149	482336	862672	842624		9646.72	17253.4	16852.5					149	295200	517960	488224		5904	10359.2	9764.48		149	199712	340016	318768		3994.24	6800.32	6375.36		149	496392
150	293968	510504	476864		5879.36	10210.1	9537.28		150	190924	373344	343552		3818.48	7466.88	6871.04		150	522360	853328	859552		10447.2	17066.6	17191					150	286160	470104	458232		5723.2	9402.08	9164.64		150	183052	334536	344008		3661.04	6690.72	6880.16		150	503008
151	299544	534368	454368		5990.88	10687.4	9087.36		151	209268	358416	330800		4185.36	7168.32	6616		151	500168	823712	857440		10003.4	16474.2	17148.8					151	290192	495408	505544		5803.84	9908.16	10110.9		151	208656	339096	335504		4173.12	6781.92	6710.08		151	471496
152	269520	470880	480896		5390.4	9417.6	9617.92		152	210284	353952	318512		4205.68	7079.04	6370.24		152	522616	885536	866944		10452.3	17710.7	17338.9					152	307104	474648	474696		6142.08	9492.96	9493.92		152	197324	317592	336328		3946.48	6351.84	6726.56		152	514800
153	304752	481824	484456		6095.04	9636.48	9689.12		153	205860	336944	351592		4117.2	6738.88	7031.84		153	469072	863456	833408		9381.44	17269.1	16668.2					153	303888	517544	484040		6077.76	10350.9	9680.8		153	203980	352416	331152		4079.6	7048.32	6623.04		153	469584
154	301384	510920	460400		6027.68	10218.4	9208		154	207792	340784	333512		4155.84	6815.68	6670.24		154	503320	881472	792352		10066.4	17629.4	15847					154	296064	461952	489520		5921.28	9239.04	9790.4		154	207232	352880	343704		4144.64	7057.6	6874.08		154	520600
155	288048	487760	464736		5760.96	9755.2	9294.72		155	211608	335968	339192		4232.16	6719.36	6783.84		155	471544	859664	837568		9430.88	17193.3	16751.4					155	300000	495152	465512		6000	9903.04	9310.24		155	206928	355800	336432		4138.56	7116	6728.64		155	481616
156	299232	492672	474544		5984.64	9853.44	9490.88		156	205252	361032	345192		4105.04	7220.64	6903.84		156	504096	836992	800128		10081.9	16739.8	16002.6					156	279160	497944	488488		5583.2	9958.88	9769.76		156	200980	316624	331104		4019.6	6332.48	6622.08		156	494272
157	308384	470880	489464		6167.68	9417.6	9789.28		157	206012	319024	343344		4120.24	6380.48	6866.88		157	486576	833824	870640		9731.52	16676.5	17412.8					157	279672	472840	483168		5593.44	9456.8	9663.36		157	206168	326904	338224		4123.36	6538.08	6764.48		157	476608
158	282176	481872	497216		5643.52	9637.44	9944.32		158	199660	347856	334384		3993.2	6957.12	6687.68		158	513816	883264	823760		10276.3	17665.3	16475.2					158	297296	489312	488120		5945.92	9786.24	9762.4		158	186200	345136	363440		3724	6902.72	7268.8		158	525248
159	304960	515424	477488		6099.2	10308.5	9549.76		159	197628	327008	329312		3952.56	6540.16	6586.24		159	513872	825184	803968		10277.4	16503.7	16079.4					159	277888	518736	496544		5557.76	10374.7	9930.88		159	212368	338784	335608		4247.36	6775.68	6712.16		159	491224
160	301328	483168	470568		6026.56	9663.36	9411.36		160	216792	340784	354824		4335.84	6815.68	7096.48		160	490192	831088	784944		9803.84	16621.8	15698.9					160	284984	490808	434576		5699.68	9816.16	8691.52		160	201492	334224	337248		4029.84	6684.48	6744.96		160	492104
161	294072	494992	449728		5881.44	9899.84	8994.56		161	196712	334944	340736		3934.24	6698.88	6814.72		161	511232	817552	821808		10224.6	16351	16436.2					161	295048	498352	522976		5900.96	9967.04	10459.5		161	198592	344472	341912		3971.84	6889.44	6838.24		161	496288
162	281864	472784	464064		5637.28	9455.68	9281.28		162	202912	353904	325728		4058.24	7078.08	6514.56		162	507768	851808	865040		10155.4	17036.2	17300.8					162	291672	503528	459888		5833.44	10070.6	9197.76		162	191632	343496	337352		3832.64	6869.92	6747.04		162	514752
163	288864	497424	478152		5777.28	9948.48	9563.04		163	196204	356672	322656		3924.08	7133.44	6453.12		163	487248	822704	845152		9744.96	16454.1	16903					163	275432	488224	482904		5508.64	9764.48	9658.08		163	208760	348728	349696		4175.2	6974.56	6993.92		163	493080
164	294128	462464	474232		5882.56	9249.28	9484.64		164	207232	343656	354720		4144.64	6873.12	7094.4		164	537264	871584	827232		10745.3	17431.7	16544.6					164	294584	492616	457512		5891.68	9852.32	9150.24		164	198544	344264	338072		3970.88	6885.28	6761.44		164	492616
165	293920	495720	490032		5878.4	9914.4	9800.64		165	189856	357648	318920		3797.12	7152.96	6378.4		165	526704	825344	865840		10534.1	16506.9	17316.8					165	282224	517544	487760		5644.48	10350.9	9755.2		165	205100	321944	344680		4102	6438.88	6893.6		165	462880
166	286568	512008	501456		5731.36	10240.2	10029.1		166	181276	340424	358360		3625.52	6808.48	7167.2		166	520600	861984	831664		10412	17239.7	16633.3					166	284216	482960	450912		5684.32	9659.2	9018.24		166	196052	332336	338840		3921.04	6646.72	6776.8		166	501872
167	287736	507664	537936		5754.72	10153.3	10758.7		167	214252	349288	334536		4285.04	6985.76	6690.72		167	488536	830880	875760		9770.72	16617.6	17515.2					167	307928	480424	486832		6158.56	9608.48	9736.64		167	196560	347192	330744		3931.2	6943.84	6614.88		167	482080
168	290752	497632	465616		5815.04	9952.64	9312.32		168	192700	342576	331920		3854	6851.52	6638.4		168	512992	882320	927328		10259.8	17646.4	18546.6					168	281864	474280	474080		5637.28	9485.6	9481.6		168	208964	361288	313448		4179.28	7225.76	6268.96		168	504712
169	291672	527008	495872		5833.44	10540.2	9917.44		169	205708	339400	334176		4114.16	6788	6683.52		169	490808	867472	781744		9816.16	17349.4	15634.9					169	276200	474128	507200		5524	9482.56	10144		169	211964	347192	324344		4239.28	6943.84	6486.88		169	464480
170	287688	492312	480320		5753.76	9846.24	9606.4		170	193768	345496	362360		3875.36	6909.92	7247.2		170	526704	881888	811968		10534.1	17637.8	16239.4					170	284216	491224	481256		5684.32	9824.48	9625.12		170	191280	354624	328184		3825.6	7092.48	6563.68		170	506832
171	296680	483936	504920		5933.6	9678.72	10098.4		171	188232	344880	331152		3764.64	6897.6	6623.04		171	507304	826128	848848		10146.1	16522.6	16977					171	276456	490240	500112		5529.12	9804.8	10002.2		171	200524	349904	345752		4010.48	6998.08	6915.04		171	499336
172	286208	495152	460504		5724.16	9903.04	9210.08		172	212928	354880	332592		4258.56	7097.6	6651.84		172	504664	872640	813808		10093.3	17452.8	16276.2					172	297448	499392	453952		5948.96	9987.84	9079.04		172	196916	347752	325832		3938.32	6955.04	6516.64		172	503680
173	288864	542816	489160		5777.28	10856.3	9783.2		173	193512	353648	354368		3870.24	7072.96	7087.36		173	510040	882160	813392		10200.8	17643.2	16267.8					173	281304	474176	489416		5626.08	9483.52	9788.32		173	202556	343400	333304		4051.12	6868	6666.08		173	473456
174	278448	501200	463496		5568.96	10024	9269.92		174	201184	342680	350472		4023.68	6853.6	7009.44		174	516304	862768	846208		10326.1	17255.4	16924.2					174	289016	472112	458440		5780.32	9442.24	9168.8		174	193108	341504	329672		3862.16	6830.08	6593.44		174	515264
175	296320	511336	497064		5926.4	10226.7	9941.28		175	206012	352824	334432		4120.24	7056.48	6688.64		175	492776	845424	847536		9855.52	16908.5	16950.7					175	293464	477640	492720		5869.28	9552.8	9854.4		175	202304	340576	355544		4046.08	6811.52	7110.88		175	459064
176	290240	491328	496136		5804.8	9826.56	9922.72		176	215520	329720	333560		4310.4	6594.4	6671.2		176	506112	904144	848736		10122.2	18082.9	16974.7					176	277784	471080	453856		5555.68	9421.6	9077.12		176	194784	322656	336016		3895.68	6453.12	6720.32		176	505544
177	276968	497840	485024		5539.36	9956.8	9700.48		177	204032	340992	335864		4080.64	6819.84	6717.28		177	494528	832816	782944		9890.56	16656.3	15658.9					177	277072	495256	477280		5541.44	9905.12	9545.6		177	206012	379816	340632		4120.24	7596.32	6812.64		177	477584
178	292544	494328	458080		5850.88	9886.56	9161.6		178	205300	352264	332080		4106	7045.28	6641.6		178	506680	846688	833296		10133.6	16933.8	16665.9					178	287128	462056	484664		5742.56	9241.12	9693.28		178	187928	338936	324448		3758.56	6778.72	6488.96		178	521792
179	296680	506576	508960		5933.6	10131.5	10179.2		179	207488	352056	351496		4149.76	7041.12	7029.92		179	506632	884064	844368		10132.6	17681.3	16887.4					179	276608	471808	504200		5532.16	9436.16	10084		179	205048	350472	337608		4100.96	7009.44	6752.16		179	505232
180	313240	484096	465768		6264.8	9681.92	9315.36		180	198644	354880	318464		3972.88	7097.6	6369.28		180	501248	872912	823024		10025	17458.2	16460.5					180	271248	485640	496240		5424.96	9712.8	9924.8		180	200016	324912	348368		4000.32	6498.24	6967.36		180	460192
181	308080	521168	472320		6161.6	10423.4	9446.4		181	196408	348880	330544		3928.16	6977.6	6610.88		181	503528	867152	823808		10070.6	17343	16476.2					181	286920	460864	481256		5738.4	9217.28	9625.12		181	202048	346624	316416		4040.96	6932.48	6328.32		181	497840
182	284520	527008	447560		5690.4	10540.2	8951.2		182	203676	348008	330440		4073.52	6960.16	6608.8		182	502592	839568	835728		10051.8	16791.4	16714.6					182	293664	508184	471856		5873.28	10163.7	9437.12		182	207588	337352	328288		4151.76	6747.04	6565.76		182	477120
183	279672	501560	507408		5593.44	10031.2	10148.2		183	211352	330848	347960		4227.04	6616.96	6959.2		183	515944	844000	824496		10318.9	16880	16489.9					183	273904	477536	471752		5478.08	9550.72	9435.04		183	199408	328696	336888		3988.16	6573.92	6737.76		183	499800
184	281104	486680	451792		5622.08	9733.6	9035.84		184	204592	348880	328392		4091.84	6977.6	6567.84		184	522824	861824	873808		10456.5	17236.5	17476.2					184	294840	504664	487816		5896.8	10093.3	9756.32		184	206368	319072	315184		4127.36	6381.44	6303.68		184	495360
185	273496	486312	481560		5469.92	9726.24	9631.2		185	202912	364160	357648		4058.24	7283.2	7152.96		185	491744	879408	854704		9834.88	17588.2	17094.1					185	295144	506264	496544		5902.88	10125.3	9930.88		185	204032	349752	342880		4080.64	6995.04	6857.6		185	499184
186	289480	488640	472112		5789.6	9772.8	9442.24		186	200472	368160	335664		4009.44	7363.2	6713.28		186	512680	856704	833936		10253.6	17134.1	16678.7					186	289376	515944	467368		5787.52	10318.9	9347.36		186	197528	355952	319072		3950.56	7119.04	6381.44		186	471752
187	283096	497528	491016		5661.92	9950.56	9820.32		187	212216	330232	351696		4244.32	6604.64	7033.92		187	500888	849472	862560		10017.8	16989.4	17251.2					187	285952	479088	473976		5719.04	9581.76	9479.52		187	207588	344936	347192		4151.76	6898.72	6943.84		187	499336
188	289272	482496	464480		5785.44	9649.92	9289.6		188	210384	333408	324504		4207.68	6668.16	6490.08		188	506216	877920	823712		10124.3	17558.4	16474.2					188	277168	494064	456224		5543.36	9881.28	9124.48		188	192852	320664	326344		3857.04	6413.28	6526.88		188	495360
189	277784	509528	487504		5555.68	10190.6	9750.08		189	193564	357080	357488		3871.28	7141.6	7149.76		189	510976	881472	825600		10219.5	17629.4	16512					189	277984	502856	461896		5559.68	10057.1	9237.92		189	187724	333456	324808		3754.48	6669.12	6496.16		189	506320
190	294024	504408	438648		5880.48	10088.2	8772.96		190	205608	361800	333616		4112.16	7236	6672.32		190	508544	903664	858496		10170.9	18073.3	17169.9					190	290448	493656	497064		5808.96	9873.12	9941.28		190	210792	353800	326240		4215.84	7076	6524.8		190	508128
191	289936	479656	507712		5798.72	9593.12	10154.2		191	212268	337712	338480		4245.36	6754.24	6769.6		191	477432	840208	846640		9548.64	16804.2	16932.8					191	275592	487920	472216		5511.84	9758.4	9444.32		191	203624	354672	324504		4072.48	7093.44	6490.08		191	489624
192	283352	492776	475056		5667.04	9855.52	9501.12		192	201388	342472	350312		4027.76	6849.44	7006.24		192	461744	929136	832608		9234.88	18582.7	16652.2					192	297344	503736	480480		5946.88	10074.7	9609.6		192	196308	357904	328392		3926.16	7158.08	6567.84		192	471960
193	293720	517752	453488		5874.4	10355	9069.76		193	200016	338168	361752		4000.32	6763.36	7235.04		193	547840	847376	806400		10956.8	16947.5	16128					193	287584	485544	474904		5751.68	9710.88	9498.08		193	197884	344776	351904		3957.68	6895.52	7038.08		193	505080
194	289016	491016	442768		5780.32	9820.32	8855.36		194	194480	356976	341400		3889.6	7139.52	6828		194	509112	872960	885488		10182.2	17459.2	17709.8					194	270232	493448	471032		5404.64	9868.96	9420.64		194	215268	328848	328848		4305.36	6576.96	6576.96		194	491840
195	271456	489880	495664		5429.12	9797.6	9913.28		195	197680	352264	356928		3953.6	7045.28	7138.56		195	505648	876720	866368		10113	17534.4	17327.4					195	285544	474440	488744		5710.88	9488.8	9774.88		195	201236	359800	343752		4024.72	7196	6875.04		195	518736
196	292032	483216	482544		5840.64	9664.32	9650.88		196	205812	384072	327312		4116.24	7681.44	6546.24		196	502184	918752	884480		10043.7	18375	17689.6					196	291672	486368	477640		5833.44	9727.36	9552.8		196	210944	341600	332128		4218.88	6832	6642.56		196	495568
197	277888	488592	492984		5557.76	9771.84	9859.68		197	204236	338992	356520		4084.72	6779.84	7130.4		197	516560	842896	845056		10331.2	16857.9	16901.1					197	294736	512528	473976		5894.72	10250.6	9479.52		197	196408	350984	361904		3928.16	7019.68	7238.08		197	503736
198	292640	487400	441792		5852.8	9748	8835.84		198	213944	347032	346416		4278.88	6940.64	6928.32		198	511488	888080	867216		10229.8	17761.6	17344.3					198	307824	492928	482440		6156.48	9858.56	9648.8		198	216792	356568	335248		4335.84	7131.36	6704.96		198	484768
199	279216	483368	480480		5584.32	9667.36	9609.6		199	196460	362008	352720		3929.2	7240.16	7054.4		199	535824	917328	825712		10716.5	18346.6	16514.2					199	308336	510200	475312		6166.72	10204	9506.24		199	199660	343088	352928		3993.2	6861.76	7058.56		199	495512
200	279568	501616	481928		5591.36	10032.3	9638.56		200	206520	357952	358520		4130.4	7159.04	7170.4		200	507248	877248	855328		10145	17545	17106.6					200	305320	503424	479552		6106.4	10068.5	9591.04		200	199408	338936	333872		3988.16	6778.72	6677.44		200	502080
201	286056	501144	461896		5721.12	10022.9	9237.92		201	201540	318056	358312		4030.8	6361.12	7166.24		201	514488	910608	797712		10289.8	18212.2	15954.2					201	279624	491944	484664		5592.48	9838.88	9693.28		201	199508	343136	346416		3990.16	6862.72	6928.32		201	499184
202	303272	500472	476088		6065.44	10009.4	9521.76		202	205252	350264	324760		4105.04	7005.28	6495.2		202	477792	874752	876816		9555.84	17495	17536.3					202	296984	501248	484664		5939.68	10025	9693.28		202	197272	354824	308536		3945.44	7096.48	6170.72		202	464736
203	286056	485072	479808		5721.12	9701.44	9596.16		203	200980	356056	342528		4019.6	7121.12	6850.56		203	507304	840352	803872		10146.1	16807	16077.4					203	295968	491688	483008		5919.36	9833.76	9660.16		203	208252	352160	315648		4165.04	7043.2	6312.96		203	513768
204	307616	510352	472784		6152.32	10207	9455.68		204	210540	351752	345648		4210.8	7035.04	6912.96		204	479136	867472	844688		9582.72	17349.4	16893.8					204	292440	480272	493808		5848.8	9605.44	9876.16		204	205200	319384	328544		4104	6387.68	6570.88		204	483064
205	293000	480120	495568		5860	9602.4	9911.36		205	197576	337504	339296		3951.52	6750.08	6785.92		205	515784	834304	803552		10315.7	16686.1	16071					205	268952	491744	469120		5379.04	9834.88	9382.4		205	191532	340216	329464		3830.64	6804.32	6589.28		205	507200
206	284368	531776	462000		5687.36	10635.5	9240		206	200980	367952	345752		4019.6	7359.04	6915.04		206	515840	892304	805232		10316.8	17846.1	16104.6					206	272984	495512	457616		5459.68	9910.24	9152.32		206	206116	317896	349696		4122.32	6357.92	6993.92		206	497736
207	273904	498512	486056		5478.08	9970.24	9721.12		207	189196	339400	336120		3783.92	6788	6722.4		207	495872	863776	873600		9917.44	17275.5	17472					207	285288	507040	467680		5705.76	10140.8	9353.6		207	196916	340168	352776		3938.32	6803.36	7055.52		207	520544
208	286160	497944	500632		5723.2	9958.88	10012.6		208	218320	360008	347288		4366.4	7200.16	6945.76		208	503320	853968	833824		10066.4	17079.4	16676.5					208	274264	507248	458544		5485.28	10145	9170.88		208	197680	331360	311456		3953.6	6627.2	6229.12		208	489832
209	287640	470512	446944		5752.8	9410.24	8938.88		209	200880	336120	332792		4017.6	6722.4	6655.84		209	491584	838096	799504		9831.68	16761.9	15990.1					209	292848	492104	446432		5856.96	9842.08	8928.64		209	191940	364720	330288		3838.8	7294.4	6605.76		209	516664
210	303680	483784	487816		6073.6	9675.68	9756.32		210	206876	352824	343808		4137.52	7056.48	6876.16		210	505752	838672	849632		10115	16773.4	16992.6					210	292336	467160	500736		5846.72	9343.2	10014.7		210	204592	339504	336584		4091.84	6790.08	6731.68		210	490504
211	280336	470408	473816		5606.72	9408.16	9476.32		211	201440	350624	346576		4028.8	7012.48	6931.52		211	488848	863776	854432		9776.96	17275.5	17088.6					211	288304	489464	488688		5766.08	9789.28	9773.76		211	208608	360880	341088		4172.16	7217.6	6821.76		211	524168
212	282840	512784	491328		5656.8	10255.7	9826.56		212	217660	362056	345904		4353.2	7241.12	6918.08		212	480168	824768	801760		9603.36	16495.4	16035.2					212	280440	478312	499696		5608.8	9566.24	9993.92		212	199608	361392	329672		3992.16	7227.84	6593.44		212	510352
213	268240	499904	493032		5364.8	9998.08	9860.64		213	200828	350472	342168		4016.56	7009.44	6843.36		213	522976	838512	806336		10459.5	16770.2	16126.7					213	275744	481512	466024		5514.88	9630.24	9320.48		213	199356	360160	342576		3987.12	7203.2	6851.52		213	516144
214	305424	522408	480584		6108.48	10448.2	9611.68		214	211252	359440	348056		4225.04	7188.8	6961.12		214	498824	809920	891872		9976.48	16198.4	17837.4					214	293304	465152	470976		5866.08	9303.04	9419.52		214	199256	343240	325472		3985.12	6864.8	6509.44		214	481360
215	258400	486984	470880		5168	9739.68	9417.6		215	199204	362008	335456		3984.08	7240.16	6709.12		215	514440	844048	798560		10288.8	16881	15971.2					215	274976	475520	494328		5499.52	9510.4	9886.56		215	192600	336480	339144		3852	6729.6	6782.88		215	505800
216	286160	517648	460864		5723.2	10353	9217.28		216	204436	356520	345240		4088.72	7130.4	6904.8		216	495768	828352	844528		9915.36	16567	16890.6					216	290704	480688	492984		5814.08	9613.76	9859.68		216	195900	361440	340064		3918	7228.8	6801.28		216	495664
217	282432	494736	443184		5648.64	9894.72	8863.68		217	196612	358520	372112		3932.24	7170.4	7442.24		217	522776	884688	802400		10455.5	17693.8	16048					217	275280	460400	471808		5505.6	9208	9436.16		217	205148	367136	343496		4102.96	7342.72	6869.92		217	517856
218	297136	485024	465616		5942.72	9700.48	9312.32		218	205656	346064	342368		4113.12	6921.28	6847.36		218	480584	814816	898752		9611.68	16296.3	17975					218	273088	467160	461224		5461.76	9343.2	9224.48		218	192804	354264	325576		3856.08	7085.28	6511.52		218	463392
219	281200	473248	457104		5624	9464.96	9142.08		219	212624	368008	339504		4252.48	7360.16	6790.08		219	512160	859552	797920		10243.2	17191	15958.4					219	288504	503576	480944		5770.08	10071.5	9618.88		219	198644	340064	330384		3972.88	6801.28	6607.68		219	537120
220	289680	512216	482496		5793.6	10244.3	9649.92		220	208352	343040	336016		4167.04	6860.8	6720.32		220	489104	925952	878240		9782.08	18519	17564.8					220	273800	469584	487448		5476	9391.68	9748.96		220	199812	336888	321688		3996.24	6737.76	6433.76		220	472320
221	265080	487248	469792		5301.6	9744.96	9395.84		221	197324	330128	346520		3946.48	6602.56	6930.4		221	533232	878240	858496		10664.6	17564.8	17169.9					221	281200	498304	478928		5624	9966.08	9578.56		221	190772	328136	323376		3815.44	6562.72	6467.52		221	482600
222	285496	508440	460816		5709.92	10168.8	9216.32		222	192852	338376	333152		3857.04	6767.52	6663.04		222	464840	878512	846320		9296.8	17570.2	16926.4					222	296832	464216	458232		5936.64	9284.32	9164.64		222	203624	346112	328336		4072.48	6922.24	6566.72		222	500424
223	274416	491376	474232		5488.32	9827.52	9484.64		223	201744	342320	342016		4034.88	6846.4	6840.32		223	505336	938032	834192		10106.7	18760.6	16683.8					223	292288	475832	470976		5845.76	9516.64	9419.52		223	201336	329360	337608		4026.72	6587.2	6752.16		223	499856
224	279624	503216	478616		5592.48	10064.3	9572.32		224	195800	353544	330232		3916	7070.88	6604.64		224	502440	827920	809872		10048.8	16558.4	16197.4					224	286920	501976	483168		5738.4	10039.5	9663.36		224	205708	339552	328240		4114.16	6791.04	6564.8		224	495768
225	275184	508592	464120		5503.68	10171.8	9282.4		225	207336	323168	329008		4146.72	6463.36	6580.16		225	514288	861184	797776		10285.8	17223.7	15955.5					225	284832	512632	449776		5696.64	10252.6	8995.52		225	196916	343040	342472		3938.32	6860.8	6849.44		225	483472
226	288816	520648	469176		5776.32	10413	9383.52		226	202252	356776	333256		4045.04	7135.52	6665.12		226	501720	827760	849264		10034.4	16555.2	16985.3					226	305320	501352	502488		6106.4	10027	10049.8		226	194580	323680	320768		3891.6	6473.6	6415.36		226	486416
227	295968	478928	497008		5919.36	9578.56	9940.16		227	206116	358568	336016		4122.32	7171.36	6720.32		227	495200	926704	788352		9904	18534.1	15767					227	278400	498928	515888		5568	9978.56	10317.8		227	204948	341296	337864		4098.96	6825.92	6757.28		227	499288
228	302560	526192	528832		6051.2	10523.8	10576.6		228	214808	350776	354928		4296.16	7015.52	7098.56		228	487400	817712	822560		9748	16354.2	16451.2					228	284064	504920	510304		5681.28	10098.4	10206.1		228	206472	332128	335864		4129.44	6642.56	6717.28		228	518632
229	294584	491432	491480		5891.68	9828.64	9829.6		229	206828	327416	354624		4136.56	6548.32	7092.48		229	536384	860928	856608		10727.7	17218.6	17132.2					229	289016	486784	503112		5780.32	9735.68	10062.2		229	206268	346416	346880		4125.36	6928.32	6937.6		229	505544
230	308744	515576	498352		6174.88	10311.5	9967.04		230	198948	385152	342168		3978.96	7703.04	6843.36		230	492464	869536	864672		9849.28	17390.7	17293.4					230	281000	496032	464016		5620	9920.64	9280.32		230	198036	351952	347240		3960.72	7039.04	6944.8		230	492568
231	282688	507504	486832		5653.76	10150.1	9736.64		231	201592	359032	355288		4031.84	7180.64	7105.76		231	491168	923360	835728		9823.36	18467.2	16714.6					231	287992	499752	490912		5759.84	9995.04	9818.24		231	207540	349648	331768		4150.8	6992.96	6635.36		231	506632
232	284520	514904	494688		5690.4	10298.1	9893.76		232	213080	366008	344064		4261.6	7320.16	6881.28		232	475216	851216	837616		9504.32	17024.3	16752.3					232	315600	509112	480632		6312	10182.2	9612.64		232	198744	347240	338840		3974.88	6944.8	6776.8		232	476608
233	297752	482648	481872		5955.04	9652.96	9637.44		233	215928	330800	346776		4318.56	6616	6935.52		233	541680	889280	810400		10833.6	17785.6	16208					233	311096	480272	489160		6221.92	9605.44	9783.2		233	210028	339656	332848		4200.56	6793.12	6656.96		233	480064
234	286720	519664	496184		5734.4	10393.3	9923.68		234	215876	353800	341856		4317.52	7076	6837.12		234	500840	829184	836560		10016.8	16583.7	16731.2					234	292288	490808	477432		5845.76	9816.16	9548.64		234	198744	348472	329928		3974.88	6969.44	6598.56		234	498304
235	298568	516408	485640		5971.36	10328.2	9712.8		235	215268	337912	318104		4305.36	6758.24	6362.08		235	510304	856752	835456		10206.1	17135	16709.1					235	291568	501096	485848		5831.36	10021.9	9716.96		235	205456	345032	351392		4109.12	6900.64	7027.84		235	531264
236	296120	499288	495664		5922.4	9985.76	9913.28		236	207896	339960	350672		4157.92	6799.2	7013.44		236	511960	829344	831984		10239.2	16586.9	16639.7					236	279112	500992	462360		5582.24	10019.8	9247.2		236	201948	352056	317384		4038.96	7041.12	6347.68		236	476088
237	303328	478824	448800		6066.56	9576.48	8976		237	206012	345752	338736		4120.24	6915.04	6774.72		237	509832	851328	841360		10196.6	17026.6	16827.2					237	278960	497680	488744		5579.2	9953.6	9774.88		237	200220	343552	323632		4004.4	6871.04	6472.64		237	489208
238	287328	485800	485696		5746.56	9716	9713.92		238	213692	368008	353392		4273.84	7360.16	7067.84		238	501872	866784	784784		10037.4	17335.7	15695.7					238	296784	484096	474952		5935.68	9681.92	9499.04		238	207388	333104	321840		4147.76	6662.08	6436.8		238	519616
239	288712	476760	454728		5774.24	9535.2	9094.56		239	205912	330696	332744		4118.24	6613.92	6654.88		239	532352	912720	846416		10647	18254.4	16928.3					239	290344	474648	479184		5806.88	9492.96	9583.68		239	211708	345088	331104		4234.16	6901.76	6622.08		239	483888
240	292232	519200	509008		5844.64	10384	10180.2		240	200220	351240	351856		4004.4	7024.8	7037.12		240	513352	825232	816336		10267	16504.6	16326.7					240	303992	497784	486520		6079.84	9955.68	9730.4		240	194528	337304	307776		3890.56	6746.08	6155.52		240	482080
241	278904	489624	488640		5578.08	9792.48	9772.8		241	204948	352624	335200		4098.96	7052.48	6704		241	502184	901136	859984		10043.7	18022.7	17199.7					241	287072	508592	483472		5741.44	10171.8	9669.44		241	193512	348008	350672		3870.24	6960.16	7013.44		241	475112
242	293000	492208	460560		5860	9844.16	9211.2		242	202404	332744	345704		4048.08	6654.88	6914.08		242	499600	816496	851744		9992	16329.9	17034.9					242	300616	492776	448384		6012.32	9855.52	8967.68		242	200880	318360	317080		4017.6	6367.2	6341.6		242	471912
243	289480	500064	478312		5789.6	10001.3	9566.24		243	201644	338992	353336		4032.88	6779.84	7066.72		243	469944	858288	783520		9398.88	17165.8	15670.4					243	275432	515944	494632		5508.64	10318.9	9892.64		243	196408	340016	344368		3928.16	6800.32	6887.36		243	519720
244	293464	482752	464784		5869.28	9655.04	9295.68		244	196664	366728	354056		3933.28	7334.56	7081.12		244	484408	865840	821232		9688.16	17316.8	16424.6					244	307208	508544	514232		6144.16	10170.9	10284.6		244	197780	344064	336120		3955.6	6881.28	6722.4		244	483168
245	268856	481200	455504		5377.12	9624	9110.08		245	195292	329976	339400		3905.84	6599.52	6788		245	495824	903824	853696		9916.48	18076.5	17073.9					245	282888	482080	487968		5657.76	9641.6	9759.36		245	200116	334176	335048		4002.32	6683.52	6700.96		245	468552
246	296016	466696	482184		5920.32	9333.92	9643.68		246	211452	351240	339912		4229.04	7024.8	6798.24		246	501096	827344	852016		10021.9	16546.9	17040.3					246	294840	514080	480376		5896.8	10281.6	9607.52		246	208912	341344	338528		4178.24	6826.88	6770.56		246	500064
247	286208	476864	472576		5724.16	9537.28	9451.52		247	212420	352368	329416		4248.4	7047.36	6588.32		247	513040	882784	863520		10260.8	17655.7	17270.4					247	282840	485952	503008		5656.8	9719.04	10060.2		247	194072	379608	336328		3881.44	7592.16	6726.56		247	484248
248	278856	504712	488024		5577.12	10094.2	9760.48		248	194376	359392	347752		3887.52	7187.84	6955.04		248	468296	858816	830352		9365.92	17176.3	16607					248	285696	514080	484768		5713.92	10281.6	9695.36		248	197172	326136	332488		3943.44	6522.72	6649.76		248	518064
249	284520	499544	444832		5690.4	9990.88	8896.64		249	202152	342112	342880		4043.04	6842.24	6857.6		249	503680	924048	821968		10073.6	18481	16439.4					249	289632	476920	497320		5792.64	9538.4	9946.4		249	206168	337096	329056		4123.36	6741.92	6581.12		249	489312
250	269112	486576	487352		5382.24	9731.52	9747.04		250	207184	357184	366160		4143.68	7143.68	7323.2		250	512680	828240	873168		10253.6	16564.8	17463.4					250	307464	523240	484040		6149.28	10464.8	9680.8		250	205456	334640	340832		4109.12	6692.8	6816.64		250	491640
251	293000	483064	468552		5860	9661.28	9371.04		251	201032	362104	339040		4020.64	7242.08	6780.8		251	496912	894368	821072		9938.24	17887.4	16421.4					251	281304	520600	468248		5626.08	10412	9364.96		251	191988	358624	342624		3839.76	7172.48	6852.48		251	490552
252	275232	491944	468344		5504.64	9838.88	9366.88		252	201184	363232	360928		4023.68	7264.64	7218.56		252	504920	842464	820544		10098.4	16849.3	16410.9					252	312120	473304	495200		6242.4	9466.08	9904		252	196560	333872	336632		3931.2	6677.44	6732.64		252	497632
253	295912	481720	476552		5918.24	9634.4	9531.04		253	222644	337712	331568		4452.88	6754.24	6631.36		253	508544	923360	854336		10170.9	18467.2	17086.7					253	282688	492672	511336		5653.76	9853.44	10226.7		253	202352	355232	332280		4047.04	7104.64	6645.6		253	519456
254	283352	491840	470000		5667.04	9836.8	9400		254	205708	364464	352312		4114.16	7289.28	7046.24		254	521840	832672	869536		10436.8	16653.4	17390.7					254	284728	500272	505904		5694.56	10005.4	10118.1		254	203880	343296	345808		4077.6	6865.92	6916.16		254	480688
255	299440	488896	469280		5988.8	9777.92	9385.6		255	200116	333768	333816		4002.32	6675.36	6676.32		255	485848	879776	844160		9716.96	17595.5	16883.2					255	273648	498928	456744		5472.96	9978.56	9134.88		255	196560	353648	329720		3931.2	7072.96	6594.4		255	473512
256	287792	501200	498304		5755.84	10024	9966.08		256	194528	359136	359752		3890.56	7182.72	7195.04		256	497680	845840	789680		9953.6	16916.8	15793.6					256	293560	507768	506216		5871.2	10155.4	10124.3		256	195496	337608	325680		3909.92	6752.16	6513.6		256	525040
257	273600	497584	503992		5472	9951.68	10079.8		257	210284	334736	318208		4205.68	6694.72	6364.16		257	498872	912880	830768		9977.44	18257.6	16615.4					257	280128	472424	480896		5602.56	9448.48	9617.92		257	192752	343912	316312		3855.04	6878.24	6326.24		257	516872
258	277120	494688	480064		5542.4	9893.76	9601.28		258	209876	318256	348928		4197.52	6365.12	6978.56		258	510768	856176	763520		10215.4	17123.5	15270.4					258	290240	472272	485544		5804.8	9445.44	9710.88		258	204692	353080	324504		4093.84	7061.6	6490.08		258	482800
259	277120	531680	459832		5542.4	10633.6	9196.64		259	209216	349496	343448		4184.32	6989.92	6868.96		259	498256	821664	825712		9965.12	16433.3	16514.2					259	274264	493552	437360		5485.28	9871.04	8747.2		259	188636	350824	339608		3772.72	7016.48	6792.16		259	477744
260	273192	496704	511752		5463.84	9934.08	10235		260	199660	336480	344880		3993.2	6729.6	6897.6		260	495152	808496	760528		9903.04	16169.9	15210.6					260	276256	492776	484504		5525.12	9855.52	9690.08		260	194680	354928	345648		3893.6	7098.56	6912.96		260	475056
261	289936	497424	456328		5798.72	9948.48	9126.56		261	215268	373392	348984		4305.36	7467.84	6979.68		261	494424	872752	789984		9888.48	17455	15799.7					261	291160	466696	482544		5823.2	9333.92	9650.88		261	187012	347088	346320		3740.24	6941.76	6926.4		261	520704
262	286920	490032	472944		5738.4	9800.64	9458.88		262	197068	358976	329776		3941.36	7179.52	6595.52		262	487552	826496	805296		9751.04	16529.9	16105.9					262	280384	491168	476816		5607.68	9823.36	9536.32		262	198948	349184	315904		3978.96	6983.68	6318.08		262	497632
263	297040	502904	498152		5940.8	10058.1	9963.04		263	215064	343088	339448		4301.28	6861.76	6788.96		263	490400	802864	891872		9808	16057.3	17837.4					263	286824	522976	463392		5736.48	10459.5	9267.84		263	189400	353288	321784		3788	7065.76	6435.68		263	495360
264	291776	509576	515472		5835.52	10191.5	10309.4		264	188536	347544	347344		3770.72	6950.88	6946.88		264	474176	846208	812176		9483.52	16924.2	16243.5					264	278808	478824	511184		5576.16	9576.48	10223.7		264	219744	354520	320000		4394.88	7090.4	6400		264	492104
265	276352	501616	439728		5527.04	10032.3	8794.56		265	211912	349392	328184		4238.24	6987.84	6563.68		265	512320	840992	847424		10246.4	16819.8	16948.5					265	295144	480840	490864		5902.88	9616.8	9817.28		265	190416	334432	330488		3808.32	6688.64	6609.76		265	473456
266	292696	483888	497888		5853.92	9677.76	9957.76		266	193108	336688	322808		3862.16	6733.76	6456.16		266	488688	831616	799616		9773.76	16632.3	15992.3					266	291928	494992	458392		5838.56	9899.84	9167.84		266	192496	335816	319384		3849.92	6716.32	6387.68		266	492776
267	296016	473560	468608		5920.32	9471.2	9372.16		267	214708	339096	323120		4294.16	6781.92	6462.4		267	498304	857920	874176		9966.08	17158.4	17483.5					267	289528	487088	464424		5790.56	9741.76	9288.48		267	180208	359080	322296		3604.16	7181.6	6445.92		267	479448
268	289480	493552	474544		5789.6	9871.04	9490.88		268	190008	327112	343912		3800.16	6542.24	6878.24		268	496600	779904	825760		9932	15598.1	16515.2					268	280288	495616	482440		5605.76	9912.32	9648.8		268	204692	326496	331312		4093.84	6529.92	6626.24		268	499336
269	297240	501816	469896		5944.8	10036.3	9397.92		269	223304	329056	308488		4466.08	6581.12	6169.76		269	486520	879360	826032		9730.4	17587.2	16520.6					269	290496	531104	462312		5809.92	10622.1	9246.24		269	184676	332384	327824		3693.52	6647.68	6556.48		269	479136
270	279008	482752	480584		5580.16	9655.04	9611.68		270	195292	341296	333048		3905.84	6825.92	6660.96		270	524480	852640	811136		10489.6	17052.8	16222.7					270	287944	534416	489984		5758.88	10688.3	9799.68		270	206168	350312	309408		4123.36	7006.24	6188.16		270	467624
271	285544	490240	411880		5710.88	9804.8	8237.6		271	199916	348520	334280		3998.32	6970.4	6685.6		271	490864	832928	846736		9817.28	16658.6	16934.7					271	286256	472376	478880		5725.12	9447.52	9577.6		271	193972	341552	344424		3879.44	6831.04	6888.48		271	465664
272	292896	504976	465096		5857.92	10099.5	9301.92		272	189804	327312	343808		3796.08	6546.24	6876.16		272	538816	842576	828448		10776.3	16851.5	16569					272	289832	483680	485280		5796.64	9673.6	9705.6		272	202508	345808	325168		4050.16	6916.16	6503.36		272	482648
273	291568	480840	466280		5831.36	9616.8	9325.6		273	212980	344368	347288		4259.6	6887.36	6945.76		273	512832	844688	855072		10256.6	16893.8	17101.4					273	294280	502232	487552		5885.6	10044.6	9751.04		273	199660	353288	319432		3993.2	7065.76	6388.64		273	491840
274	293872	466848	442512		5877.44	9336.96	8850.24		274	203472	332128	321688		4069.44	6642.56	6433.76		274	512528	822128	828976		10250.6	16442.6	16579.5					274	283040	497376	492464		5660.8	9947.52	9849.28		274	205860	342424	322144		4117.2	6848.48	6442.88		274	485800
275	288400	488176	467520		5768	9763.52	9350.4		275	206928	363336	346928		4138.56	7266.72	6938.56		275	472944	886864	860928		9458.88	17737.3	17218.6					275	293872	514128	462256		5877.44	10282.6	9245.12		275	193208	342984	333048		3864.16	6859.68	6660.96		275	505184
276	282376	458704	486008		5647.52	9174.08	9720.16		276	195544	352928	329616		3910.88	7058.56	6592.32		276	528096	844000	846368		10561.9	16880	16927.4					276	275128	501248	504768		5502.56	10025	10095.4		276	213740	353952	314880		4274.8	7079.04	6297.6		276	483832
277	265184	477120	469688		5303.68	9542.4	9393.76		277	215064	363496	317080		4301.28	7269.92	6341.6		277	513248	850528	845632		10265	17010.6	16912.6					277	295968	468760	454320		5919.36	9375.2	9086.4		277	183308	345752	327264		3666.16	6915.04	6545.28		277	506112
278	276608	501352	457408		5532.16	10027	9148.16		278	199812	350056	344624		3996.24	7001.12	6892.48		278	546032	914464	873488		10920.6	18289.3	17469.8					278	279720	485904	500320		5594.4	9718.08	10006.4		278	199608	343704	347392		3992.16	6874.08	6947.84		278	483264
279	283504	485072	491272		5670.08	9701.44	9825.44		279	204744	353288	344880		4094.88	7065.76	6897.6		279	505288	830976	862624		10105.8	16619.5	17252.5					279	309816	480424	450192		6196.32	9608.48	9003.84		279	195036	328392	341400		3900.72	6567.84	6828		279	487968
280	289784	452872	487816		5795.68	9057.44	9756.32		280	202152	345856	337200		4043.04	6917.12	6744		280	526400	828976	831136		10528	16579.5	16622.7					280	288912	495616	468504		5778.24	9912.32	9370.08		280	199356	357848	340784		3987.12	7156.96	6815.68		280	492672
281	271760	500272	474744		5435.2	10005.4	9494.88		281	200168	354464	347448		4003.36	7089.28	6948.96		281	468088	846640	878448		9361.76	16932.8	17569					281	298976	459632	461024		5979.52	9192.64	9220.48		281	197068	331152	320304		3941.36	6623.04	6406.08		281	476504
282	271712	496240	473616		5434.24	9924.8	9472.32		282	192192	342064	335920		3843.84	6841.28	6718.4		282	530064	839616	824192		10601.3	16792.3	16483.8					282	275080	487968	500680		5501.6	9759.36	10013.6		282	201540	351184	344472		4030.8	7023.68	6889.44		282	457872
283	294944	456120	452976		5898.88	9122.4	9059.52		283	198288	354880	357184		3965.76	7097.6	7143.68		283	491792	792992	861136		9835.84	15859.8	17222.7					283	296120	504816	481096		5922.4	10096.3	9621.92		283	195340	336480	329520		3906.8	6729.6	6590.4		283	492512
284	290960	458232	462568		5819.2	9164.64	9251.36		284	205048	335200	345032		4100.96	6704	6900.64		284	519096	894624	856752		10381.9	17892.5	17135					284	278856	493752	470312		5577.12	9875.04	9406.24		284	204388	336272	292848		4087.76	6725.44	5856.96		284	484040
285	271152	494840	475160		5423.04	9896.8	9503.2		285	195140	342624	338528		3902.8	6852.48	6770.56		285	473872	879824	822128		9477.44	17596.5	16442.6					285	294736	492464	473512		5894.72	9849.28	9470.24		285	199256	355136	324504		3985.12	7102.72	6490.08		285	491792
286	277832	515888	452976		5556.64	10317.8	9059.52		286	204336	356976	332944		4086.72	7139.52	6658.88		286	500272	873072	862464		10005.4	17461.4	17249.3					286	308184	486368	500272		6163.68	9727.36	10005.4		286	187112	329824	329464		3742.24	6596.48	6589.28		286	501352
287	276712	493552	474744		5534.24	9871.04	9494.88		287	203980	348216	333000		4079.6	6964.32	6660		287	496440	877920	835872		9928.8	17558.4	16717.4					287	298472	500272	464272		5969.44	10005.4	9285.44		287	194680	333408	329264		3893.6	6668.16	6585.28		287	497216
288	270336	482960	488024		5406.72	9659.2	9760.48		288	190772	359752	307776		3815.44	7195.04	6155.52		288	499496	865888	799456		9989.92	17317.8	15989.1					288	263088	494992	450344		5261.76	9899.84	9006.88		288	196256	352208	332536		3925.12	7044.16	6650.72		288	487920
289	267016	512736	490136		5340.32	10254.7	9802.72		289	203728	354624	325984		4074.56	7092.48	6519.68		289	503736	840624	850272		10074.7	16812.5	17005.4					289	293152	484664	450760		5863.04	9693.28	9015.2		289	177876	339608	326752		3557.52	6792.16	6535.04		289	497840
290	264416	459992	478152		5288.32	9199.84	9563.04		290	202048	347904	334024		4040.96	6958.08	6680.48		290	514696	860560	842144		10293.9	17211.2	16842.9					290	263856	458600	475520		5277.12	9172	9510.4		290	207792	343704	321944		4155.84	6874.08	6438.88		290	481664
291	285032	490864	461384		5700.64	9817.28	9227.68		291	206520	352312	336176		4130.4	7046.24	6723.52		291	515576	860768	859552		10311.5	17215.4	17191					291	291312	505648	457672		5826.24	10113	9153.44		291	195088	350984	319896		3901.76	7019.68	6397.92		291	467008
292	279008	493752	447304		5580.16	9875.04	8946.08		292	196004	344576	330592		3920.08	6891.52	6611.84		292	516824	860816	875024		10336.5	17216.3	17500.5					292	281816	493344	497320		5636.32	9866.88	9946.4		292	198392	347344	353080		3967.84	6946.88	7061.6		292	481616
293	274008	511336	496136		5480.16	10226.7	9922.72		293	194580	351800	339608		3891.6	7036	6792.16		293	504976	811440	851216		10099.5	16228.8	17024.3					293	286824	486208	456176		5736.48	9724.16	9123.52		293	205964	336176	330440		4119.28	6723.52	6608.8		293	474440
294	283960	452096	470512		5679.2	9041.92	9410.24		294	203828	347856	325728		4076.56	6957.12	6514.56		294	487040	881888	843792		9740.8	17637.8	16875.8					294	290192	459112	490032		5803.84	9182.24	9800.64		294	205252	358160	339960		4105.04	7163.2	6799.2		294	490912
295	282120	498200	472528		5642.4	9964	9450.56		295	206624	359288	347856		4132.48	7185.76	6957.12		295	523344	838416	783312		10466.9	16768.3	15666.2					295	300056	492568	503736		6001.12	9851.36	10074.7		295	202708	334896	316112		4054.16	6697.92	6322.24		295	481768
296	264208	473920	474128		5284.16	9478.4	9482.56		296	198288	329360	340120		3965.76	6587.2	6802.4		296	522568	876336	821664		10451.4	17526.7	16433.3					296	270280	466592	470672		5405.6	9331.84	9413.44		296	211404	363696	338888		4228.08	7273.92	6777.76		296	462928
297	280952	505024	482288		5619.04	10100.5	9645.76		297	208404	367344	354568		4168.08	7346.88	7091.36		297	496136	877776	837728		9922.72	17555.5	16754.6					297	298008	497480	470312		5960.16	9949.6	9406.24		297	197728	331312	334944		3954.56	6626.24	6698.88		297	499128
298	276504	477488	457824		5530.08	9549.76	9156.48		298	205504	331104	331256		4110.08	6622.08	6625.12		298	495720	864832	844528		9914.4	17296.6	16890.6					298	274112	450040	446896		5482.24	9000.8	8937.92		298	193412	362464	344472		3868.24	7249.28	6889.44		298	495360
299	254272	536848	519872		5085.44	10737	10397.4		299	206064	346776	355800		4121.28	6935.52	7116		299	486264	884688	849856		9725.28	17693.8	16997.1					299	273496	504144	461896		5469.92	10082.9	9237.92		299	207792	355496	325680		4155.84	7109.92	6513.6		299	464528
300	284472	479136	512424		5689.44	9582.72	10248.5		300	204996	339552	325264		4099.92	6791.04	6505.28		300	500680	875872	808976		10013.6	17517.4	16179.5					300	272320	508544	498872		5446.4	10170.9	9977.44		300	212216	349032	338480		4244.32	6980.64	6769.6		300	474544
301	291976	515888	491792		5839.52	10317.8	9835.84		301	204488	370928	352464		4089.76	7418.56	7049.28		301	516248	863568	869472		10325	17271.4	17389.4					301	288400	508080	488744		5768	10161.6	9774.88		301	184880	343656	336016		3697.6	6873.12	6720.32		301	478360
302	281000	496496	470000		5620	9929.92	9400		302	211200	349440	342576		4224	6988.8	6851.52		302	500472	821072	824448		10009.4	16421.4	16489					302	294176	477488	499440		5883.52	9549.76	9988.8		302	203776	347960	340888		4075.52	6959.2	6817.76		302	477688
303	295352	498048	480632		5907.04	9960.96	9612.64		303	186148	344368	344264		3722.96	6887.36	6885.28		303	486880	844000	836560		9737.6	16880	16731.2					303	289936	498304	469944		5798.72	9966.08	9398.88		303	200780	318920	324960		4015.6	6378.4	6499.2		303	487968
304	276408	478984	472528		5528.16	9579.68	9450.56		304	197884	338016	343448		3957.68	6760.32	6868.96		304	491688	827504	871744		9833.76	16550.1	17434.9					304	258248	478824	475008		5164.96	9576.48	9500.16		304	219336	365240	356880		4386.72	7304.8	7137.6		304	476712
305	287736	504664	481304		5754.72	10093.3	9626.08		305	201184	369648	351184		4023.68	7392.96	7023.68		305	487400	853232	804496		9748	17064.6	16089.9					305	299232	501512	470824		5984.64	10030.2	9416.48		305	190416	323424	334944		3808.32	6468.48	6698.88		305	473920
306	285240	514696	451736		5704.8	10293.9	9034.72		306	200780	353696	309968		4015.6	7073.92	6199.36		306	504248	882000	876608		10085	17640	17532.2					306	279160	456016	489264		5583.2	9120.32	9785.28		306	206116	368624	348216		4122.32	7372.48	6964.32		306	464120
307	294128	494584	487968		5882.56	9891.68	9759.36		307	200676	338992	357232		4013.52	6779.84	7144.64		307	498976	888080	813504		9979.52	17761.6	16270.1					307	289168	485848	481256		5783.36	9716.96	9625.12		307	198848	338016	324400		3976.96	6760.32	6488		307	505288
308	286000	467984	464064		5720	9359.68	9281.28		308	218728	357080	317544		4374.56	7141.6	6350.88		308	521584	902512	821184		10431.7	18050.2	16423.7					308	293360	481048	453904		5867.2	9620.96	9078.08		308	207232	374472	360568		4144.64	7489.44	7211.36		308	484560
309	271096	476144	489416		5421.92	9522.88	9788.32		309	190972	352312	327112		3819.44	7046.24	6542.24		309	497736	864672	787568		9954.72	17293.4	15751.4					309	291728	492312	504872		5834.56	9846.24	10097.4		309	198900	328544	321072		3978	6570.88	6421.44		309	491744
310	265792	488640	491944		5315.84	9772.8	9838.88		310	201896	353904	318920		4037.92	7078.08	6378.4		310	490192	864880	795664		9803.84	17297.6	15913.3					310	272680	487296	453184		5453.6	9745.92	9063.68		310	192548	360672	352112		3850.96	7213.44	7042.24		310	504512
311	275744	494328	481976		5514.88	9886.56	9639.52		311	183612	355544	342112		3672.24	7110.88	6842.24		311	481048	809024	841248		9620.96	16180.5	16825					311	289320	484352	471032		5786.4	9687.04	9420.64		311	200424	344832	319488		4008.48	6896.64	6389.76		311	483472
312	274672	506992	480632		5493.44	10139.8	9612.64		312	202048	358624	321024		4040.96	7172.48	6420.48		312	499544	824032	863248		9990.88	16480.6	17265					312	278296	471240	469640		5565.92	9424.8	9392.8		312	200932	349184	343960		4018.64	6983.68	6879.2		312	487040
313	292640	469280	474176		5852.8	9385.6	9483.52		313	209216	351440	346008		4184.32	7028.8	6920.16		313	508232	868896	850688		10164.6	17377.9	17013.8					313	287432	497112	478928		5748.64	9942.24	9578.56		313	196968	361080	330488		3939.36	7221.6	6609.76		313	501456
314	263496	476352	476088		5269.92	9527.04	9521.76		314	206828	334072	328440		4136.56	6681.44	6568.8		314	491744	856544	826656		9834.88	17130.9	16533.1					314	288912	485128	507304		5778.24	9702.56	10146.1		314	188588	344264	344936		3771.76	6885.28	6898.72		314	490600
315	293304	491536	468968		5866.08	9830.72	9379.36		315	183308	354568	340888		3666.16	7091.36	6817.76		315	503264	863824	824496		10065.3	17276.5	16489.9					315	280232	504976	470408		5604.64	10099.5	9408.16		315	206268	339248	328544		4125.36	6784.96	6570.88		315	450968
316	279568	499184	478984		5591.36	9983.68	9579.68		316	210436	353288	348216		4208.72	7065.76	6964.32		316	488896	909120	866576		9777.92	18182.4	17331.5					316	282376	487920	451272		5647.52	9758.4	9025.44		316	197576	358976	338272		3951.52	7179.52	6765.44		316	504560
317	287384	487816	474336		5747.68	9756.32	9486.72		317	204084	330184	365856		4081.68	6603.68	7317.12		317	520704	820336	864576		10414.1	16406.7	17291.5					317	286920	510096	487608		5738.4	10201.9	9752.16		317	201896	343040	305776		4037.92	6860.8	6115.52		317	463496
318	295096	453696	472736		5901.92	9073.92	9454.72		318	201288	340576	317848		4025.76	6811.52	6356.96		318	525824	886064	827504		10516.5	17721.3	16550.1					318	282224	490136	459424		5644.48	9802.72	9188.48		318	207692	335712	355136		4153.84	6714.24	7102.72		318	489312
319	281104	526752	462928		5622.08	10535	9258.56		319	188484	351440	352720		3769.68	7028.8	7054.4		319	504456	915360	803392		10089.1	18307.2	16067.8					319	275792	494168	508384		5515.84	9883.36	10167.7		319	193716	329776	309256		3874.32	6595.52	6185.12		319	482080
320	279264	482904	481768		5585.28	9658.08	9635.36		320	213792	343240	332280		4275.84	6864.8	6645.6		320	491016	847536	856608		9820.32	16950.7	17132.2					320	286416	456744	454160		5728.32	9134.88	9083.2		320	193260	336224	340992		3865.2	6724.48	6819.84		320	474544
321	283040	498824	448648		5660.8	9976.48	8972.96		321	209828	355592	352624		4196.56	7111.84	7052.48		321	527888	890496	839312		10557.8	17809.9	16786.2					321	285496	507040	513920		5709.92	10140.8	10278.4		321	196256	345600	312016		3925.12	6912	6240.32		321	484560
322	298568	490240	465664		5971.36	9804.8	9313.28		322	204488	342368	330896		4089.76	6847.36	6617.92		322	498152	910016	841776		9963.04	18200.3	16835.5					322	285592	496648	457464		5711.84	9932.96	9149.28		322	186148	336480	332640		3722.96	6729.6	6652.8		322	492464
323	260540	479912	449680		5210.8	9598.24	8993.6		323	195292	347192	333872		3905.84	6943.84	6677.44		323	525872	817136	818032		10517.4	16342.7	16360.6					323	296272	520032	492880		5925.44	10400.6	9857.6		323	203828	352416	330288		4076.56	7048.32	6605.76		323	491016
324	281152	447360	464584		5623.04	8947.2	9291.68		324	212064	350056	335096		4241.28	7001.12	6701.92		324	525568	827136	853488		10511.4	16542.7	17069.8					324	286208	489832	471808		5724.16	9796.64	9436.16		324	195748	308280	348880		3914.96	6165.6	6977.6		324	499648
325	286256	475416	490600		5725.12	9508.32	9812		325	191684	321120	342272		3833.68	6422.4	6845.44		325	475264	879456	873968		9505.28	17589.1	17479.4					325	282176	504608	488536		5643.52	10092.2	9770.72		325	201540	332640	323784		4030.8	6652.8	6475.68		325	495928
326	262680	489880	454624		5253.6	9797.6	9092.48		326	206980	331464	349904		4139.6	6629.28	6998.08		326	506424	835728	787776		10128.5	16714.6	15755.5					326	305168	480992	484664		6103.36	9619.84	9693.28		326	199052	350520	341704		3981.04	7010.4	6834.08		326	478104
327	281616	468088	459576		5632.32	9361.76	9191.52		327	199916	344832	340376		3998.32	6896.64	6807.52		327	506576	840672	835936		10131.5	16813.4	16718.7					327	284320	506736	480688		5686.4	10134.7	9613.76		327	205352	335152	307872		4107.04	6703.04	6157.44		327	499184
328	300664	474176	472480		6013.28	9483.52	9449.6		328	204388	347752	329208		4087.76	6955.04	6584.16		328	504408	786832	828560		10088.2	15736.6	16571.2					328	290144	473352	440040		5802.88	9467.04	8800.8		328	195900	315184	332792		3918	6303.68	6655.84		328	523856
329	282328	485232	470048		5646.56	9704.64	9400.96		329	186404	358520	357440		3728.08	7170.4	7148.8		329	506056	877184	879824		10121.1	17543.7	17596.5					329	275488	523808	497944		5509.76	10476.2	9958.88		329	217148	360928	328648		4342.96	7218.56	6572.96		329	478104
330	281000	464840	432928		5620	9296.8	8658.56		330	212216	338528	346216		4244.32	6770.56	6924.32		330	504040	863776	843200		10080.8	17275.5	16864					330	294944	493448	462624		5898.88	9868.96	9252.48		330	189196	354416	338328		3783.92	7088.32	6766.56		330	511488
331	281048	489624	483112		5620.96	9792.48	9662.24		331	203624	334840	329928		4072.48	6696.8	6598.56		331	483112	846000	834560		9662.24	16920	16691.2					331	292336	509008	491840		5846.72	10180.2	9836.8		331	205200	333152	328592		4104	6663.04	6571.84		331	478000
332	270536	500576	516824		5410.72	10011.5	10336.5		332	216032	330592	338016		4320.64	6611.84	6760.32		332	519872	833408	856752		10397.4	16668.2	17135					332	307208	487192	472784		6144.16	9743.84	9455.68		332	211252	318000	337712		4225.04	6360	6754.24		332	533232
333	266200	473616	478416		5324	9472.32	9568.32		333	196356	326240	335968		3927.12	6524.8	6719.36		333	497888	889600	824448		9957.76	17792	16489					333	287640	493656	499856		5752.8	9873.12	9997.12		333	207792	363440	321528		4155.84	7268.8	6430.56		333	495928
334	301280	506008	449624		6025.6	10120.2	8992.48		334	209624	336736	334944		4192.48	6734.72	6698.88		334	510456	806704	847952		10209.1	16134.1	16959					334	278144	468608	439832		5562.88	9372.16	8796.64		334	191076	343704	338072		3821.52	6874.08	6761.44		334	501872
335	297392	514440	498768		5947.84	10288.8	9975.36		335	207640	334432	331768		4152.8	6688.64	6635.36		335	508488	872224	844096		10169.8	17444.5	16881.9					335	288352	504768	493656		5767.04	10095.4	9873.12		335	203268	344832	329312		4065.36	6896.64	6586.24		335	497376
336	283400	491272	478256		5668	9825.44	9565.12		336	207388	331408	323120		4147.76	6628.16	6462.4		336	507456	879360	853120		10149.1	17587.2	17062.4					336	302912	500992	461792		6058.24	10019.8	9235.84		336	186656	335096	339192		3733.12	6701.92	6783.84		336	514696
337	287792	493704	500320		5755.84	9874.08	10006.4		337	192140	341296	370672		3842.8	6825.92	7413.44		337	510664	846368	824704		10213.3	16927.4	16494.1					337	284728	499696	465152		5694.56	9993.92	9303.04		337	198084	343656	334176		3961.68	6873.12	6683.52		337	484976
338	297648	477536	482600		5952.96	9550.72	9652		338	192140	350160	337760		3842.8	7003.2	6755.2		338	503064	813440	848000		10061.3	16268.8	16960					338	286512	477328	481048		5730.24	9546.56	9620.96		338	188740	329312	336888		3774.8	6586.24	6737.76		338	511184
339	299184	478416	478104		5983.68	9568.32	9562.08		339	196664	357336	330544		3933.28	7146.72	6610.88		339	489520	836720	856384		9790.4	16734.4	17127.7					339	270944	497840	512056		5418.88	9956.8	10241.1		339	209572	343400	310992		4191.44	6868	6219.84		339	492568
340	289832	471496	468656		5796.64	9429.92	9373.12		340	191888	364928	351240		3837.76	7298.56	7024.8		340	463704	904144	824240		9274.08	18082.9	16484.8					340	292184	477328	476296		5843.68	9546.56	9525.92		340	201288	323272	327984		4025.76	6465.44	6559.68		340	476968
341	294176	487248	501976		5883.52	9744.96	10039.5		341	189448	352464	322144		3788.96	7049.28	6442.88		341	524016	812704	856752		10480.3	16254.1	17135					341	288048	495304	496704		5760.96	9906.08	9934.08		341	199864	352776	343656		3997.28	7055.52	6873.12		341	496544
342	283960	479344	433960		5679.2	9586.88	8679.2		342	208860	347448	348776		4177.2	6948.96	6975.52		342	510664	847536	807072		10213.3	16950.7	16141.4					342	276816	488952	458904		5536.32	9779.04	9178.08		342	197068	330592	327472		3941.36	6611.84	6549.44		342	505800
343	280184	498976	456840		5603.68	9979.52	9136.8		343	197680	345192	333768		3953.6	6903.84	6675.36		343	497680	829392	840944		9953.6	16587.8	16818.9					343	298160	478880	488176		5963.2	9577.6	9763.52		343	199712	340064	315496		3994.24	6801.28	6309.92		343	454416
344	279160	490240	494328		5583.2	9804.8	9886.56		344	207184	333816	350520		4143.68	6676.32	7010.4		344	481616	818816	801344		9632.32	16376.3	16026.9					344	299544	489312	473352		5990.88	9786.24	9467.04		344	199916	335664	317080		3998.32	6713.28	6341.6		344	517080
345	287024	498352	493912		5740.48	9967.04	9878.24		345	208912	339808	329720		4178.24	6796.16	6594.4		345	466800	834608	844832		9336	16692.2	16896.6					345	295656	463088	474384		5913.12	9261.76	9487.68		345	197220	348776	317184		3944.4	6975.52	6343.68		345	493912
346	297960	489056	464992		5959.2	9781.12	9299.84		346	201844	352568	341144		4036.88	7051.36	6822.88		346	509728	857504	797456		10194.6	17150.1	15949.1					346	278344	456480	471648		5566.88	9129.6	9432.96		346	199864	340632	336784		3997.28	6812.64	6735.68		346	500992
347	298728	517336	519352		5974.56	10346.7	10387		347	201644	359648	343960		4032.88	7192.96	6879.2		347	472216	853328	809968		9444.32	17066.6	16199.4					347	283192	495568	492984		5663.84	9911.36	9859.68		347	199916	337144	356160		3998.32	6742.88	7123.2		347	472840
348	291824	448648	485440		5836.48	8972.96	9708.8		348	202352	340680	321528		4047.04	6813.6	6430.56		348	516352	839088	810400		10327	16781.8	16208					348	287840	496032	452976		5756.8	9920.64	9059.52		348	184320	319944	332336		3686.4	6398.88	6646.72		348	512008
349	271608	502752	495200		5432.16	10055	9904		349	204336	349440	329056		4086.72	6988.8	6581.12		349	511544	850384	852704		10230.9	17007.7	17054.1					349	273448	454680	474488		5468.96	9093.6	9489.76		349	197832	338072	335096		3956.64	6761.44	6701.92		349	476760
350	297296	480424	473872		5945.92	9608.48	9477.44		350	202964	338784	349752		4059.28	6775.68	6995.04		350	496752	842208	864096		9935.04	16844.2	17281.9					350	286256	485072	446944		5725.12	9701.44	8938.88		350	200576	323888	334024		4011.52	6477.76	6680.48		350	491640
mean					5736.27	9867.16	9565.79							4066.37	6972.78	6803.09							10070.5	17248.3	16767.7						287052	491136	478322		5741.05	9822.73	9566.44		175.5	199246	342653	332160		3984.93	6853.07	6643.2		175.5	492862
sum of the 1st and 2nd nebuliser means																							9802.64	16839.9	16368.9
full stdv					213.98	348.526	360.718							158.98	251.194	235.557							337.538	609.844	577.645										208.365	319.967	340.77							151.648	259.765	243.142
Poisson stdv					75.7382	99.3336	97.8049							63.7681	83.5032	82.4808							100.352	131.333	129.49										75.7697	99.1097	97.8082							63.1263	82.7833	81.5058
full variance					45787.4	121470	130118							25274.7	63098.6	55486.9							113932	371909	333674										43416	102379	116124							22997.3	67478.1	59117.8
Poisson variance					5736.27	9867.16	9565.79							4066.37	6972.78	6803.09							10070.5	17248.3	16767.7										5741.05	9822.73	9566.44							3984.93	6853.07	6643.2
excess variance					40051.1	111603	120552							21208.4	56125.8	48683.8							103861	354661	316906		Cov	Cov	Cov						37674.9	92556.3	106558							19012.3	60625	52474.6
sum of the 1st and 2nd nebuliser excess variances																							61259.5	167729	169236		21301	93466.1	73835.2
excess stdv					200.128	334.071	347.206							145.631	236.909	220.644							322.275	595.534	562.944		r(M1,M2)	r(M1,M2)	r(M1,M2)						194.1	304.231	326.431							137.885	246.222	229.073
sum of the 1st and 2nd nebuliser excess stdv																							345.759	570.98	567.85		0.730867	1.18096	0.963793
ratio of excess stdv to mean					0.0348882	0.0338568	0.0362966							0.0358135	0.0339762	0.0324329							0.0320019	0.0345271	0.0335731										0.0338092	0.0309721	0.0341226							0.0346017	0.0359286	0.0344824
measured count ratio						0.58135	1.0315								0.583177	1.02494								0.583855	1.02866											0.584466	1.02679								0.581481	1.03159
ratio of excess stdv						0.599058	0.962169								0.614713	1.07372								0.541154	1.05789											0.638004	0.931989							0	0.560005	1.07486
reference ratio of natural Ba isotope abundances						0.586821									0.586821									0.586821												0.586821									0.586821
A note on the comparison of the excess variances in the presense of a perfect correlation
between signals for a given isotope arising from two different nebuliser / spray chamber systems:
Proof: for the case of a perfect correlation, we have:
[truncated: 5 more columns]
