# Supplementary material for: The ICPMS signal as a Poisson process: a review of basic concepts
Source: Royal Society of Chemistry journal article supplement (doi:10.1039/c4ja00319e), 2014-12-15
Supplement: c4ja00319e8.xlsx [file c4ja00319e8.xlsx]

## Sheet: se16c01.TXT
	GE on
	40 ml Xe-Ar	Xe129(LR)	Xe130(LR)	Xe131(LR)	Xe132(LR)		Xe129(LR)	Xe130(LR)	Xe131(LR)	Xe132(LR)				60 ml Xe-Ar	Xe129(LR)	Xe130(LR)	Xe131(LR)	Xe132(LR)		Xe129(LR)	Xe130(LR)	Xe131(LR)	Xe132(LR)				80 ml Xe-Ar	Xe129(LR)	Xe130(LR)	Xe131(LR)	Xe132(LR)		Xe129(LR)	Xe130(LR)	Xe131(LR)	Xe132(LR)				100 ml Xe-Ar	Xe129(LR)	Xe130(LR)	Xe131(LR)	Xe132(LR)		Xe129(LR)	Xe130(LR)	Xe131(LR)	Xe132(LR)
	/ min													/ min													/ min													/ min
	Sweeps	Intensities, cps					Counts							Sweeps	Intensities, cps					Counts							Sweeps	Intensities, cps					Counts							Sweeps	Intensities, cps					Counts
	1	737808	114258	603568	755456		14756.2	2285.16	12071.4	15109.1				1	1160672	170904	913408	1195488		23213.4	3418.08	18268.2	23909.8				1	1525536	231620	1249024	1579520		30510.7	4632.4	24980.5	31590.4				1	1976416	305360	1543264	2024672		39528.3	6107.2	30865.3	40493.4
	2	734928	112796	586032	759328		14698.6	2255.92	11720.6	15186.6				2	1159712	171056	918896	1181824		23194.2	3421.12	18377.9	23636.5				2	1559712	228228	1214336	1546656		31194.2	4564.56	24286.7	30933.1				2	1947648	303992	1579040	2021696		38953	6079.84	31580.8	40433.9
	3	725440	116024	606192	767168		14508.8	2320.48	12123.8	15343.4				3	1140992	176820	913712	1149472		22819.8	3536.4	18274.2	22989.4				3	1550944	234964	1261568	1613792		31018.9	4699.28	25231.4	32275.8				3	1953376	303024	1584672	2082144		39067.5	6060.48	31693.4	41642.9
	4	740544	114712	584128	759024		14810.9	2294.24	11682.6	15180.5				4	1137536	174392	922064	1148064		22750.7	3487.84	18441.3	22961.3				4	1537056	241652	1242240	1578880		30741.1	4833.04	24844.8	31577.6				4	1986272	306632	1567456	1997792		39725.4	6132.64	31349.1	39955.8
	5	731472	120564	579872	759280		14629.4	2411.28	11597.4	15185.6				5	1135808	174796	935472	1175808		22716.2	3495.92	18709.4	23516.2				5	1523360	237448	1246080	1567360		30467.2	4748.96	24921.6	31347.2				5	1972736	303888	1573568	2012512		39454.7	6077.76	31471.4	40250.2
	6	726928	116880	615584	769232		14538.6	2337.6	12311.7	15384.6				6	1127136	177528	939408	1172128		22542.7	3550.56	18788.2	23442.6				6	1517408	237344	1259840	1561408		30348.2	4746.88	25196.8	31228.2				6	1889376	311152	1574368	2076832		37787.5	6223.04	31487.4	41536.6
	7	731984	113350	607424	761344		14639.7	2267	12148.5	15226.9				7	1121696	180812	933136	1193408		22433.9	3616.24	18662.7	23868.2				7	1531968	241704	1256800	1568672		30639.4	4834.08	25136	31373.4				7	1960672	293480	1580416	1974624		39213.4	5869.6	31608.3	39492.5
	8	739776	116932	585568	747152		14795.5	2338.64	11711.4	14943				8	1132992	177628	908992	1178944		22659.8	3552.56	18179.8	23578.9				8	1489568	238512	1281600	1588224		29791.4	4770.24	25632	31764.5				8	1993760	300032	1582976	2000000		39875.2	6000.64	31659.5	40000
	9	733744	117588	620320	764800		14674.9	2351.76	12406.4	15296				9	1140896	177476	924256	1181600		22817.9	3549.52	18485.1	23632				9	1507616	238712	1251904	1583072		30152.3	4774.24	25038.1	31661.4				9	1920160	305512	1575104	2067712		38403.2	6110.24	31502.1	41354.2
	10	730960	113198	597520	770896		14619.2	2263.96	11950.4	15417.9				10	1126592	180964	923568	1180416		22531.8	3619.28	18471.4	23608.3				10	1578240	239372	1251232	1574464		31564.8	4787.44	25024.6	31489.3				10	2008096	299776	1568320	2043328		40161.9	5995.52	31366.4	40866.6
	11	736576	116880	597776	759072		14731.5	2337.6	11955.5	15181.4				11	1145280	178944	941488	1174592		22905.6	3578.88	18829.8	23491.8				11	1560224	236688	1231808	1587392		31204.5	4733.76	24636.2	31747.8				11	1953312	313848	1608576	1969824		39066.2	6276.96	32171.5	39396.5
	12	727088	113904	599008	778592		14541.8	2278.08	11980.2	15571.8				12	1132448	182736	940288	1184032		22649	3654.72	18805.8	23680.6				12	1482336	242968	1236192	1574528		29646.7	4859.36	24723.8	31490.6				12	1947808	302776	1587008	2001024		38956.2	6055.52	31740.2	40020.5
	13	734352	116376	585360	779264		14687	2327.52	11707.2	15585.3				13	1108192	172572	941600	1208672		22163.8	3451.44	18832	24173.4				13	1542336	233496	1230112	1562400		30846.7	4669.92	24602.2	31248				13	2007392	299472	1559072	2042112		40147.8	5989.44	31181.4	40842.2
	14	758400	115670	592896	760672		15168	2313.4	11857.9	15213.4				14	1174976	178284	922016	1163296		23499.5	3565.68	18440.3	23265.9				14	1523936	232784	1243040	1609664		30478.7	4655.68	24860.8	32193.3				14	1957440	307136	1600896	2051712		39148.8	6142.72	32017.9	41034.2
	15	722496	118696	614464	794080		14449.9	2373.92	12289.3	15881.6				15	1137760	173940	957344	1210912		22755.2	3478.8	19146.9	24218.2				15	1534272	240840	1240576	1600768		30685.4	4816.8	24811.5	32015.4				15	1984864	303840	1577376	2015968		39697.3	6076.8	31547.5	40319.4
	16	741472	110878	570080	774608		14829.4	2217.56	11401.6	15492.2				16	1165056	170856	923728	1170880		23301.1	3417.12	18474.6	23417.6				16	1541120	242160	1235616	1594176		30822.4	4843.2	24712.3	31883.5				16	1967968	305816	1583072	2016992		39359.4	6116.32	31661.4	40339.8
	17	736672	118444	607472	756336		14733.4	2368.88	12149.4	15126.7				17	1137216	172776	915216	1203744		22744.3	3455.52	18304.3	24074.9				17	1529312	243780	1251840	1627680		30586.2	4875.6	25036.8	32553.6				17	1933408	305160	1600256	2034976		38668.2	6103.2	32005.1	40699.5
	18	722240	109012	608192	780912		14444.8	2180.24	12163.8	15618.2				18	1099328	167368	946016	1197600		21986.6	3347.36	18920.3	23952				18	1524992	231976	1219616	1612096		30499.8	4639.52	24392.3	32241.9				18	1943744	307240	1579104	2069376		38874.9	6144.8	31582.1	41387.5
	19	734208	120866	597936	781328		14684.2	2417.32	11958.7	15626.6				19	1134560	174092	911792	1172032		22691.2	3481.84	18235.8	23440.6				19	1569696	240032	1251264	1563584		31393.9	4800.64	25025.3	31271.7				19	1984224	298304	1579200	1978624		39684.5	5966.08	31584	39572.5
	20	738992	120564	597168	748432		14779.8	2411.28	11943.4	14968.6				20	1147424	175556	938848	1192896		22948.5	3511.12	18777	23857.9				20	1535936	240384	1244832	1619168		30718.7	4807.68	24896.6	32383.4				20	1895392	300440	1594656	2029728		37907.8	6008.8	31893.1	40594.6
	21	732912	115520	608704	779264		14658.2	2310.4	12174.1	15585.3				21	1116512	181624	932400	1193920		22330.2	3632.48	18648	23878.4				21	1531168	231976	1219424	1587808		30623.4	4639.52	24388.5	31756.2				21	1946112	300688	1612160	2054688		38922.2	6013.76	32243.2	41093.8
	22	737088	109668	598960	767584		14741.8	2193.36	11979.2	15351.7				22	1151232	163832	909296	1192160		23024.6	3276.64	18185.9	23843.2				22	1559136	237040	1216256	1550720		31182.7	4740.8	24325.1	31014.4				22	1944320	320960	1584512	1977280		38886.4	6419.2	31690.2	39545.6
	23	754368	114914	603888	739456		15087.4	2298.28	12077.8	14789.1				23	1116032	180916	936912	1172544		22320.6	3618.32	18738.2	23450.9				23	1532544	238104	1242560	1589728		30650.9	4762.08	24851.2	31794.6				23	1912384	301704	1609024	2049344		38247.7	6034.08	32180.5	40986.9
	24	726048	112292	601312	760208		14521	2245.84	12026.2	15204.2				24	1143200	178388	921712	1190432		22864	3567.76	18434.2	23808.6				24	1550592	227216	1243648	1580672		31011.8	4544.32	24873	31613.4				24	1985824	293936	1538912	2031360		39716.5	5878.72	30778.2	40627.2
	25	754160	110626	597984	766816		15083.2	2212.52	11959.7	15336.3				25	1153024	175352	928976	1177696		23060.5	3507.04	18579.5	23553.9				25	1562848	242816	1223136	1591744		31257	4856.32	24462.7	31834.9				25	2038528	299728	1581696	1985344		40770.6	5994.56	31633.9	39706.9
	26	747568	115570	612208	749056		14951.4	2311.4	12244.2	14981.1				26	1162144	171664	919936	1161408		23242.9	3433.28	18398.7	23228.2				26	1494272	242616	1270560	1598496		29885.4	4852.32	25411.2	31969.9				26	1924800	301808	1559616	2081440		38496	6036.16	31192.3	41628.8
	27	710752	123186	594384	769808		14215	2463.72	11887.7	15396.2				27	1147168	174948	910912	1178048		22943.4	3498.96	18218.2	23561				27	1545600	238056	1245984	1547168		30912	4761.12	24919.7	30943.4				27	1988416	295968	1552320	1977440		39768.3	5919.36	31046.4	39548.8
	28	765888	112090	586432	747616		15317.8	2241.8	11728.6	14952.3				28	1156384	184252	891200	1194240		23127.7	3685.04	17824	23884.8				28	1564128	244336	1274176	1582688		31282.6	4886.72	25483.5	31653.8				28	2028448	304552	1564864	1987776		40569	6091.04	31297.3	39755.5
	29	726976	120110	601680	758192		14539.5	2402.2	12033.6	15163.8				29	1143808	181672	937600	1166528		22876.2	3633.44	18752	23330.6				29	1555072	230000	1259840	1616160		31101.4	4600	25196.8	32323.2				29	1945728	295712	1667520	2112576		38914.6	5914.24	33350.4	42251.5
	30	731616	109668	585264	746224		14632.3	2193.36	11705.3	14924.5				30	1117664	177324	918592	1228064		22353.3	3546.48	18371.8	24561.3				30	1549952	234104	1228640	1620448		30999	4682.08	24572.8	32409				30	1972960	305816	1524640	2028928		39459.2	6116.32	30492.8	40578.6
	31	745344	116730	599008	763408		14906.9	2334.6	11980.2	15268.2				31	1138784	177428	914496	1151136		22775.7	3548.56	18289.9	23022.7				31	1553440	228732	1247744	1557728		31068.8	4574.64	24954.9	31154.6				31	1979104	306328	1628864	1972544		39582.1	6126.56	32577.3	39450.9
	32	736784	112998	608240	780544		14735.7	2259.96	12164.8	15610.9				32	1129024	182632	933536	1177152		22580.5	3652.64	18670.7	23543				32	1507520	235624	1259360	1608448		30150.4	4712.48	25187.2	32169				32	1932320	302776	1603872	2039872		38646.4	6055.52	32077.4	40797.4
	33	739984	114560	586432	767024		14799.7	2291.2	11728.6	15340.5				33	1124512	175908	882800	1209696		22490.2	3518.16	17656	24193.9				33	1578304	231872	1273920	1578176		31566.1	4637.44	25478.4	31563.5				33	1975232	299472	1575808	1978400		39504.6	5989.44	31516.2	39568
	34	742304	116830	586336	765216		14846.1	2336.6	11726.7	15304.3				34	1154336	178032	924096	1141728		23086.7	3560.64	18481.9	22834.6				34	1489504	243324	1245024	1605440		29790.1	4866.48	24900.5	32108.8				34	1973920	300944	1598912	2016128		39478.4	6018.88	31978.2	40322.6
	35	754896	118444	600960	767232		15097.9	2368.88	12019.2	15344.6				35	1139680	184100	918176	1220352		22793.6	3682	18363.5	24407				35	1525696	236992	1255936	1610304		30513.9	4739.84	25118.7	32206.1				35	1933632	310744	1552448	2076576		38672.6	6214.88	31049	41531.5
	36	714864	112038	582544	760768		14297.3	2240.76	11650.9	15215.4				36	1116672	173384	928304	1200576		22333.4	3467.68	18566.1	24011.5				36	1525920	235928	1209408	1590688		30518.4	4718.56	24188.2	31813.8				36	1937600	292520	1552640	1988736		38752	5850.4	31052.8	39774.7
	37	740384	120362	591408	746640		14807.7	2407.24	11828.2	14932.8				37	1145696	178588	925808	1142496		22913.9	3571.76	18516.2	22849.9				37	1544800	239016	1256512	1597600		30896	4780.32	25130.2	31952				37	1966720	298256	1593056	2043840		39334.4	5965.12	31861.1	40876.8
	38	737664	112998	612720	784480		14753.3	2259.96	12254.4	15689.6				38	1134496	187692	967056	1192416		22689.9	3753.84	19341.1	23848.3				38	1468736	235724	1225664	1642592		29374.7	4714.48	24513.3	32851.8				38	1887712	306888	1575904	2035296		37754.2	6137.76	31518.1	40705.9
	39	749264	113754	605376	791648		14985.3	2275.08	12107.5	15833				39	1098176	169692	926944	1152928		21963.5	3393.84	18538.9	23058.6				39	1516032	236788	1259200	1569120		30320.6	4735.76	25184	31382.4				39	1965760	312120	1552320	2050528		39315.2	6242.4	31046.4	41010.6
	40	745232	118848	596384	749168		14904.6	2376.96	11927.7	14983.4				40	1118400	178488	898464	1161152		22368	3569.76	17969.3	23223				40	1520064	236940	1257216	1596352		30401.3	4738.8	25144.3	31927				40	1962784	306632	1605184	2063168		39255.7	6132.64	32103.7	41263.4
	41	734976	114712	593920	760880		14699.5	2294.24	11878.4	15217.6				41	1112384	178488	921856	1198976		22247.7	3569.76	18437.1	23979.5				41	1519264	228632	1234592	1611104		30385.3	4572.64	24691.8	32222.1				41	1960800	294296	1577664	2076128		39216	5885.92	31553.3	41522.6
	42	765632	119454	600400	776416		15312.6	2389.08	12008	15528.3				42	1129728	175456	917456	1174336		22594.6	3509.12	18349.1	23486.7				42	1541344	230708	1228384	1573792		30826.9	4614.16	24567.7	31475.8				42	2028704	299120	1576704	2031232		40574.1	5982.4	31534.1	40624.6
	43	719248	113502	588080	766560		14385	2270.04	11761.6	15331.2				43	1160032	179044	922640	1157984		23200.6	3580.88	18452.8	23159.7				43	1498944	243424	1240576	1611296		29978.9	4868.48	24811.5	32225.9				43	1930656	305112	1577184	2046464		38613.1	6102.24	31543.7	40929.3
	44	713744	107096	591216	764592		14274.9	2141.92	11824.3	15291.8				44	1112864	175960	944704	1196288		22257.3	3519.2	18894.1	23925.8				44	1520064	237952	1251968	1568352		30401.3	4759.04	25039.4	31367				44	1952672	298200	1604832	2065984		39053.4	5964	32096.6	41319.7
	45	749632	110274	582944	757104		14992.6	2205.48	11658.9	15142.1				45	1131424	171208	913504	1162432		22628.5	3424.16	18270.1	23248.6				45	1548512	245352	1268416	1575168		30970.2	4907.04	25368.3	31503.4				45	1976416	318624	1534112	2006528		39528.3	6372.48	30682.2	40130.6
	46	752096	117638	611232	765776		15041.9	2352.76	12224.6	15315.5				46	1150784	174900	899968	1177568		23015.7	3498	17999.4	23551.4				46	1508896	237548	1226016	1630464		30177.9	4750.96	24520.3	32609.3				46	1942176	311760	1606688	2061472		38843.5	6235.2	32133.8	41229.4
	47	738992	113148	604192	773104		14779.8	2262.96	12083.8	15462.1				47	1102400	185768	921600	1170080		22048	3715.36	18432	23401.6				47	1487872	232380	1231520	1543904		29757.4	4647.6	24630.4	30878.1				47	1950624	299472	1578464	2043168		39012.5	5989.44	31569.3	40863.4
	48	752000	109870	589312	770896		15040	2197.4	11786.2	15417.9				48	1154656	174140	910704	1170240		23093.1	3482.8	18214.1	23404.8				48	1516096	234608	1238528	1605568		30321.9	4692.16	24770.6	32111.4				48	1976256	305968	1570688	1999744		39525.1	6119.36	31413.8	39994.9
	49	738320	115720	593920	766400		14766.4	2314.4	11878.4	15328				49	1172352	184556	914080	1195392		23447	3691.12	18281.6	23907.8				49	1509472	237800	1267392	1629888		30189.4	4756	25347.8	32597.8				49	1929760	297288	1629504	2046528		38595.2	5945.76	32590.1	40930.6
	50	724864	113602	617136	769088		14497.3	2272.04	12342.7	15381.8				50	1122112	169388	936560	1205504		22442.2	3387.76	18731.2	24110.1				50	1559872	241448	1232000	1588608		31197.4	4828.96	24640	31772.2				50	1960320	306176	1576928	2003072		39206.4	6123.52	31538.6	40061.4
	51	736832	112744	584752	757888		14736.6	2254.88	11695	15157.8				51	1167360	175252	910864	1177792		23347.2	3505.04	18217.3	23555.8				51	1563328	243224	1211648	1597312		31266.6	4864.48	24233	31946.2				51	1964608	305464	1604832	2028864		39292.2	6109.28	32096.6	40577.3
	52	747568	115014	612464	761696		14951.4	2300.28	12249.3	15233.9				52	1151232	172980	929072	1163008		23024.6	3459.6	18581.4	23260.2				52	1498144	240488	1274240	1581280		29962.9	4809.76	25484.8	31625.6				52	1931264	309680	1636032	2068352		38625.3	6193.6	32720.6	41367
	53	734512	110122	614208	756224		14690.2	2202.44	12284.2	15124.5				53	1110336	173836	948144	1168736		22206.7	3476.72	18962.9	23374.7				53	1528832	235216	1247008	1600896		30576.6	4704.32	24940.2	32017.9				53	1977760	293176	1545856	2045984		39555.2	5863.52	30917.1	40919.7
	54	751840	118344	611168	777136		15036.8	2366.88	12223.4	15542.7				54	1155264	177124	910288	1136448		23105.3	3542.48	18205.8	22729				54	1596960	240184	1244192	1578080		31939.2	4803.68	24883.8	31561.6				54	1963488	309784	1565184	1988256		39269.8	6195.68	31303.7	39765.1
	55	768464	116780	600240	777600		15369.3	2335.6	12004.8	15552				55	1156416	182484	902976	1210656		23128.3	3649.68	18059.5	24213.1				55	1482400	241144	1262624	1610656		29648	4822.88	25252.5	32213.1				55	1892448	302312	1619488	2055936		37849	6046.24	32389.8	41118.7
	56	752208	118798	596128	753024		15044.2	2375.96	11922.6	15060.5				56	1114624	175656	929968	1198272		22292.5	3513.12	18599.4	23965.4				56	1521824	236840	1215424	1575744		30436.5	4736.8	24308.5	31514.9				56	2004480	290336	1521760	2022784		40089.6	5806.72	30435.2	40455.7
	57	724608	119706	622624	772336		14492.2	2394.12	12452.5	15446.7				57	1168896	182836	908624	1152288		23377.9	3656.72	18172.5	23045.8				57	1564800	242816	1264928	1598656		31296	4856.32	25298.6	31973.1				57	1935808	307952	1602528	2029088		38716.2	6159.04	32050.6	40581.8
	58	720128	115620	611888	746992		14402.6	2312.4	12237.8	14939.8				58	1130688	179248	946688	1165600		22613.8	3584.96	18933.8	23312				58	1503968	233192	1282976	1594176		30079.4	4663.84	25659.5	31883.5				58	1965600	299624	1601312	2080256		39312	5992.48	32026.2	41605.1
	59	737200	110778	595728	759488		14744	2215.56	11914.6	15189.8				59	1093984	174140	946944	1196800		21879.7	3482.8	18938.9	23936				59	1540704	235168	1241248	1593120		30814.1	4703.36	24825	31862.4				59	1985184	310288	1569472	2013280		39703.7	6205.76	31389.4	40265.6
	60	754272	114006	593008	767952		15085.4	2280.12	11860.2	15359				60	1152864	175760	925344	1192512		23057.3	3515.2	18506.9	23850.2				60	1538688	250164	1272960	1578976		30773.8	5003.28	25459.2	31579.5				60	2023040	310392	1618432	2037632		40460.8	6207.84	32368.6	40752.6
	61	713936	116024	601632	765936		14278.7	2320.48	12032.6	15318.7				61	1132896	182280	960928	1177536		22657.9	3645.6	19218.6	23550.7				61	1522976	239980	1237728	1618272		30459.5	4799.6	24754.6	32365.4				61	1941056	300944	1643456	2033888		38821.1	6018.88	32869.1	40677.8
	62	710128	122430	609024	771968		14202.6	2448.6	12180.5	15439.4				62	1121280	176820	918592	1197024		22425.6	3536.4	18371.8	23940.5				62	1547552	241196	1235424	1576608		30951	4823.92	24708.5	31532.2				62	1996256	313896	1576224	1969344		39925.1	6277.92	31524.5	39386.9
	63	741840	122178	601728	783696		14836.8	2443.56	12034.6	15673.9				63	1135392	172120	905824	1168576		22707.8	3442.4	18116.5	23371.5				63	1518016	239320	1284960	1623264		30360.3	4786.4	25699.2	32465.3				63	1956768	320344	1623712	2032224		39135.4	6406.88	32474.2	40644.5
	64	732288	119252	596704	763504		14645.8	2385.04	11934.1	15270.1				64	1125920	175456	935616	1228320		22518.4	3509.12	18712.3	24566.4				64	1525536	239320	1222976	1561984		30510.7	4786.4	24459.5	31239.7				64	1879712	306888	1582816	2028320		37594.2	6137.76	31656.3	40566.4
	65	726784	114056	588944	775696		14535.7	2281.12	11778.9	15513.9				65	1104192	170604	924768	1166464		22083.8	3412.08	18495.4	23329.3				65	1565184	240080	1220576	1621984		31303.7	4801.6	24411.5	32439.7				65	1962624	299320	1581216	2029728		39252.5	5986.4	31624.3	40594.6
	66	745344	117436	611424	752720		14906.9	2348.72	12228.5	15054.4				66	1183488	185112	941392	1166624		23669.8	3702.24	18827.8	23332.5				66	1527456	241348	1255072	1597536		30549.1	4826.96	25101.4	31950.7				66	1961120	314248	1602208	2055168		39222.4	6284.96	32044.2	41103.4
	67	716464	111888	599824	764384		14329.3	2237.76	11996.5	15287.7				67	1144224	179044	960976	1181472		22884.5	3580.88	19219.5	23629.4				67	1539552	238764	1241408	1599776		30791	4775.28	24828.2	31995.5				67	1950560	303232	1569408	2046592		39011.2	6064.64	31388.2	40931.8
	68	751024	110980	596192	773168		15020.5	2219.6	11923.8	15463.4				68	1116096	176820	873472	1188064		22321.9	3536.4	17469.4	23761.3				68	1601088	241500	1241472	1554976		32021.8	4830	24829.4	31099.5				68	1983840	298912	1563744	1945248		39676.8	5978.24	31274.9	38905
	69	749360	113148	608656	774304		14987.2	2262.96	12173.1	15486.1				69	1153696	171764	915536	1167744		23073.9	3435.28	18310.7	23354.9				69	1533056	241752	1235456	1627008		30661.1	4835.04	24709.1	32540.2				69	1945184	310184	1640736	2051968		38903.7	6203.68	32814.7	41039.4
	70	738224	115418	594752	757984		14764.5	2308.36	11895	15159.7				70	1147936	170804	944656	1204640		22958.7	3416.08	18893.1	24092.8				70	1534656	239576	1249632	1613696		30693.1	4791.52	24992.6	32273.9				70	1930016	308816	1567712	2023040		38600.3	6176.32	31354.2	40460.8
	71	758032	114460	597312	757984		15160.6	2289.2	11946.2	15159.7				71	1132608	182836	909664	1192736		22652.2	3656.72	18193.3	23854.7				71	1544256	241296	1281120	1556672		30885.1	4825.92	25622.4	31133.4				71	1993760	307448	1591008	2006208		39875.2	6148.96	31820.2	40124.2
	72	737200	115620	605984	782144		14744	2312.4	12119.7	15642.9				72	1145440	184048	912832	1155552		22908.8	3680.96	18256.6	23111				72	1493632	232176	1271136	1635424		29872.6	4643.52	25422.7	32708.5				72	1897536	308768	1612896	2046912		37950.7	6175.36	32257.9	40938.2
	73	739776	119252	594704	781072		14795.5	2385.04	11894.1	15621.4				73	1119232	178236	923776	1193760		22384.6	3564.72	18475.5	23875.2				73	1552800	243324	1238560	1613120		31056	4866.48	24771.2	32262.4				73	1945248	303024	1572384	2006048		38905	6060.48	31447.7	40121
	74	738320	113198	599424	765360		14766.4	2263.96	11988.5	15307.2				74	1132000	176568	908944	1168416		22640	3531.36	18178.9	23368.3				74	1597120	245656	1274976	1598496		31942.4	4913.12	25499.5	31969.9				74	1975712	312576	1564128	1989888		39514.2	6251.52	31282.6	39797.8
	75	734976	119706	589472	772240		14699.5	2394.12	11789.4	15444.8				75	1159840	180360	956400	1178624		23196.8	3607.2	19128	23572.5				75	1528384	233800	1238048	1592800		30567.7	4676	24761	31856				75	1939968	299928	1545120	2019744		38799.4	5998.56	30902.4	40394.9
	76	735024	115872	596896	766816		14700.5	2317.44	11937.9	15336.3				76	1122752	167520	928448	1225856		22455	3350.4	18569	24517.1				76	1524640	241096	1269760	1586688		30492.8	4821.92	25395.2	31733.8				76	1978720	287440	1559552	2013536		39574.4	5748.8	31191	40270.7
	77	740848	118546	592128	759168		14817	2370.92	11842.6	15183.4				77	1138176	178336	912928	1180832		22763.5	3566.72	18258.6	23616.6				77	1571968	238408	1236768	1598816		31439.4	4768.16	24735.4	31976.3				77	2006816	301400	1597792	2051104		40136.3	6028	31955.8	41022.1
	78	762320	110626	613376	773936		15246.4	2212.52	12267.5	15478.7				78	1173696	185920	946736	1169632		23473.9	3718.4	18934.7	23392.6				78	1501216	234964	1268128	1618528		30024.3	4699.28	25362.6	32370.6				78	1967904	303232	1602208	2032384		39358.1	6064.64	32044.2	40647.7
	79	727968	112796	605008	764592		14559.4	2255.92	12100.2	15291.8				79	1117504	177728	931824	1183232		22350.1	3554.56	18636.5	23664.6				79	1570752	237344	1242560	1580960		31415	4746.88	24851.2	31619.2				79	1954496	303584	1541728	2002336		39089.9	6071.68	30834.6	40046.7
	80	738944	111080	594896	751584		14778.9	2221.6	11897.9	15031.7				80	1149792	176060	924192	1185536		22995.8	3521.2	18483.8	23710.7				80	1594144	247176	1247168	1563584		31882.9	4943.52	24943.4	31271.7				80	2007040	309376	1575744	2024224		40140.8	6187.52	31514.9	40484.5
	81	739520	112240	593408	771616		14790.4	2244.8	11868.2	15432.3				81	1147648	174696	936912	1174496		22953	3493.92	18738.2	23489.9				81	1504704	233748	1219680	1604512		30094.1	4674.96	24393.6	32090.2				81	1868128	306936	1618976	2081696		37362.6	6138.72	32379.5	41633.9
	82	737920	120210	591152	743584		14758.4	2404.2	11823	14871.7				82	1125248	176872	916768	1233728		22505	3537.44	18335.4	24674.6				82	1564160	235672	1240864	1561792		31283.2	4713.44	24817.3	31235.8				82	2000768	291400	1566560	2025152		40015.4	5828	31331.2	40503
	83	738016	112240	589360	761904		14760.3	2244.8	11787.2	15238.1				83	1134816	176820	914848	1183648		22696.3	3536.4	18297	23673				83	1539232	239424	1266816	1605664		30784.6	4788.48	25336.3	32113.3				83	1946944	313184	1594912	2048320		38938.9	6263.68	31898.2	40966.4
	84	733888	119000	596960	753808		14677.8	2380	11939.2	15076.2				84	1163488	179296	959936	1186016		23269.8	3585.92	19198.7	23720.3				84	1514720	240588	1262240	1603712		30294.4	4811.76	25244.8	32074.2				84	1936160	311560	1585216	2054240		38723.2	6231.2	31704.3	41084.8
	85	738224	116326	604656	765424		14764.5	2326.52	12093.1	15308.5				85	1148480	175808	915472	1167584		22969.6	3516.16	18309.4	23351.7				85	1562880	235672	1237568	1580512		31257.6	4713.44	24751.4	31610.2				85	1967680	303328	1552640	1979648		39353.6	6066.56	31052.8	39593
	86	737920	118344	579056	789440		14758.4	2366.88	11581.1	15788.8				86	1172672	172168	905664	1172672		23453.4	3443.36	18113.3	23453.4				86	1560672	243424	1264000	1610464		31213.4	4868.48	25280	32209.3				86	1962400	313440	1628800	2060800		39248	6268.8	32576	41216
	87	749632	113148	603216	777040		14992.6	2262.96	12064.3	15540.8				87	1150048	164692	949488	1197504		23001	3293.84	18989.8	23950.1				87	1482400	229544	1208992	1585088		29648	4590.88	24179.8	31701.8				87	1878048	299472	1587392	2063968		37561	5989.44	31747.8	41279.4
	88	755088	113148	611584	755968		15101.8	2262.96	12231.7	15119.4				88	1123360	175760	905616	1205248		22467.2	3515.2	18112.3	24105				88	1587808	234052	1197664	1580352		31756.2	4681.04	23953.3	31607				88	2008704	298608	1567200	2032064		40174.1	5972.16	31344	40641.3
	89	725648	114510	589568	769136		14513	2290.2	11791.4	15382.7				89	1142784	181420	937856	1156064		22855.7	3628.4	18757.1	23121.3				89	1522784	241348	1265728	1590848		30455.7	4826.96	25314.6	31817				89	1961504	314456	1590688	2091808		39230.1	6289.12	31813.8	41836.2
	90	731888	112744	598960	763504		14637.8	2254.88	11979.2	15270.1				90	1124608	180660	945904	1159520		22492.2	3613.2	18918.1	23190.4				90	1467360	235976	1227232	1629344		29347.2	4719.52	24544.6	32586.9				90	1983840	300288	1607104	2065056		39676.8	6005.76	32142.1	41301.1
	91	745648	109114	614512	774048		14913	2182.28	12290.2	15481				91	1107168	177224	945440	1170368		22143.4	3544.48	18908.8	23407.4				91	1572032	229240	1242464	1569152		31440.6	4584.8	24849.3	31383				91	1995488	297592	1565824	1992480		39909.8	5951.84	31316.5	39849.6
	92	727248	116426	578640	779616		14545	2328.52	11572.8	15592.3				92	1165856	182532	905200	1177856		23317.1	3650.64	18104	23557.1				92	1526912	241096	1251264	1574208		30538.2	4821.92	25025.3	31484.2				92	1951040	305008	1628064	2040736		39020.8	6100.16	32561.3	40814.7
	93	733472	115720	591216	767488		14669.4	2314.4	11824.3	15349.8				93	1135328	174496	940976	1195456		22706.6	3489.92	18819.5	23909.1				93	1526592	234204	1256736	1615616		30531.8	4684.08	25134.7	32312.3				93	1965472	304704	1559072	2038432		39309.4	6094.08	31181.4	40768.6
	94	726512	114006	578480	771360		14530.2	2280.12	11569.6	15427.2				94	1125408	170856	917968	1176160		22508.2	3417.12	18359.4	23523.2				94	1545760	241956	1223552	1555072		30915.2	4839.12	24471	31101.4				94	1986912	299368	1579584	1965536		39738.2	5987.36	31591.7	39310.7
	95	729040	111636	604752	786592		14580.8	2232.72	12095	15731.8				95	1119040	178488	921712	1177632		22380.8	3569.76	18434.2	23552.6				95	1561312	249708	1267776	1628384		31226.2	4994.16	25355.5	32567.7				95	1940032	302976	1574368	2082560		38800.6	6059.52	31487.4	41651.2
	96	748384	113956	599168	762896		14967.7	2279.12	11983.4	15257.9				96	1132256	170904	951616	1198176		22645.1	3418.08	19032.3	23963.5				96	1553056	228380	1218112	1626368		31061.1	4567.6	24362.2	32527.4				96	1899168	297696	1582496	2068192		37983.4	5953.92	31649.9	41363.8
	97	732864	115670	587312	756288		14657.3	2313.4	11746.2	15125.8				97	1136864	178236	895456	1215680		22737.3	3564.72	17909.1	24313.6				97	1574048	239524	1247552	1576704		31481	4790.48	24951	31534.1				97	2001408	296728	1545152	1960256		40028.2	5934.56	30903	39205.1
	98	731776	111686	610304	791760		14635.5	2233.72	12206.1	15835.2				98	1151360	172472	933808	1156896		23027.2	3449.44	18676.2	23137.9				98	1501888	234608	1235104	1626720		30037.8	4692.16	24702.1	32534.4				98	1927584	303176	1611584	2032800		38551.7	6063.52	32231.7	40656
	99	738432	116226	603632	745904		14768.6	2324.52	12072.6	14918.1				99	1130784	176568	951408	1203904		22615.7	3531.36	19028.2	24078.1				99	1514400	237904	1235168	1596960		30288	4758.08	24703.4	31939.2				99	1987872	306680	1564736	2105856		39757.4	6133.6	31294.7	42117.1
	100	745088	122178	600080	767424		14901.8	2443.56	12001.6	15348.5				100	1127072	170352	902448	1155904		22541.4	3407.04	18049	23118.1				100	1554976	249660	1251424	1606848		31099.5	4993.2	25028.5	32137				100	2008800	314096	1567360	2002816		40176	6281.92	31347.2	40056.3
	101	721616	116326	589984	766096		14432.3	2326.52	11799.7	15321.9				101	1162336	168480	933440	1166208		23246.7	3369.6	18668.8	23324.2				101	1473088	231520	1256160	1630720		29461.8	4630.4	25123.2	32614.4				101	1894656	305360	1610944	2066880		37893.1	6107.2	32218.9	41337.6
	102	724048	113854	608144	756592		14481	2277.08	12162.9	15131.8				102	1106272	178944	923312	1215840		22125.4	3578.88	18466.2	24316.8				102	1549184	234456	1234784	1565184		30983.7	4689.12	24695.7	31303.7				102	1998944	305264	1582400	2052256		39978.9	6105.28	31648	41045.1
	103	731008	117688	604864	782768		14620.2	2353.76	12097.3	15655.4				103	1172544	178588	887056	1153760		23450.9	3571.76	17741.1	23075.2				103	1536256	245704	1230208	1587552		30725.1	4914.08	24604.2	31751				103	2009824	300488	1587872	2022976		40196.5	6009.76	31757.4	40459.5
	104	743120	113502	598128	779264		14862.4	2270.04	11962.6	15585.3				104	1148064	181168	928864	1177120		22961.3	3623.36	18577.3	23542.4				104	1511648	235368	1243648	1604288		30233	4707.36	24873	32085.8				104	1911104	304960	1612736	2022880		38222.1	6099.2	32254.7	40457.6
	105	736000	114208	597872	766400		14720	2284.16	11957.4	15328				105	1106624	176416	927520	1191456		22132.5	3528.32	18550.4	23829.1				105	1544192	239880	1246400	1557376		30883.8	4797.6	24928	31147.5				105	1908416	309984	1586432	2034912		38168.3	6199.68	31728.6	40698.2
	106	728176	116880	610048	760720		14563.5	2337.6	12201	15214.4				106	1166336	175708	910592	1174816		23326.7	3514.16	18211.8	23496.3				106	1560672	250012	1259776	1570208		31213.4	5000.24	25195.5	31404.2				106	1956384	298712	1608960	2016960		39127.7	5974.24	32179.2	40339.2
	107	732864	117436	589152	769648		14657.3	2348.72	11783	15393				107	1167040	178992	922384	1192416		23340.8	3579.84	18447.7	23848.3				107	1529824	239424	1234624	1613152		30596.5	4788.48	24692.5	32263				107	1943616	310952	1616992	2037024		38872.3	6219.04	32339.8	40740.5
	108	748544	109164	597568	751280		14970.9	2183.28	11951.4	15025.6				108	1152128	174140	926432	1201632		23042.6	3482.8	18528.6	24032.6				108	1584512	232176	1214112	1580000		31690.2	4643.52	24282.2	31600				108	1939968	315728	1579456	2043072		38799.4	6314.56	31589.1	40861.4
	109	727248	117638	602608	780704		14545	2352.76	12052.2	15614.1				109	1131264	180460	918480	1168480		22625.3	3609.2	18369.6	23369.6				109	1552640	241144	1238624	1550784		31052.8	4822.88	24772.5	31015.7				109	1964064	303280	1630080	2047168		39281.3	6065.6	32601.6	40943.4
	110	714928	105836	587360	766352		14298.6	2116.72	11747.2	15327				110	1101088	183392	930432	1176864		22021.8	3667.84	18608.6	23537.3				110	1554464	225088	1230688	1638976		31089.3	4501.76	24613.8	32779.5				110	1917312	296528	1590080	1995872		38346.2	5930.56	31801.6	39917.4
	111	726368	113250	601472	776000		14527.4	2265	12029.4	15520				111	1107904	177124	938576	1208352		22158.1	3542.48	18771.5	24167				111	1549248	240992	1248608	1594144		30985	4819.84	24972.2	31882.9				111	1975488	300032	1601248	2021632		39509.8	6000.64	32025	40432.6
	112	712144	111384	588752	793408		14242.9	2227.68	11775	15868.2				112	1136128	184048	906192	1179744		22722.6	3680.96	18123.8	23594.9				112	1513760	236180	1278016	1572192		30275.2	4723.6	25560.3	31443.8				112	1946944	302568	1596000	2010144		38938.9	6051.36	31920	40202.9
	113	730384	113148	605584	773728		14607.7	2262.96	12111.7	15474.6				113	1136384	173432	957808	1197920		22727.7	3468.64	19156.2	23958.4				113	1539104	236888	1246240	1605440		30782.1	4737.76	24924.8	32108.8				113	1906560	286376	1576480	2058176		38131.2	5727.52	31529.6	41163.5
	114	750608	116628	601936	763552		15012.2	2332.56	12038.7	15271				114	1137184	177580	940768	1222144		22743.7	3551.6	18815.4	24442.9				114	1546976	246920	1202752	1558432		30939.5	4938.4	24055	31168.6				114	1971712	301960	1537312	2014912		39434.2	6039.2	30746.2	40298.2
	115	733632	114106	608960	766912		14672.6	2282.12	12179.2	15338.2				115	1144608	173332	919264	1165312		22892.2	3466.64	18385.3	23306.2				115	1525376	231468	1252896	1620256		30507.5	4629.36	25057.9	32405.1				115	1989088	304344	1610176	2006272		39781.8	6086.88	32203.5	40125.4
	116	727712	113552	597424	757472		14554.2	2271.04	11948.5	15149.4				116	1151200	178792	917504	1218720		23024	3575.84	18350.1	24374.4				116	1526240	234712	1266048	1577376		30524.8	4694.24	25321	31547.5				116	1892000	298712	1538592	2053760		37840	5974.24	30771.8	41075.2
	117	740240	113854	629920	773104		14804.8	2277.08	12598.4	15462.1				117	1126592	170500	910496	1175328		22531.8	3410	18209.9	23506.6				117	1553376	231520	1205248	1583392		31067.5	4630.4	24105	31667.8				117	1918656	307296	1586944	2031936		38373.1	6145.92	31738.9	40638.7
	118	730688	113198	595824	767280		14613.8	2263.96	11916.5	15345.6				118	1138336	179144	944704	1180256		22766.7	3582.88	18894.1	23605.1				118	1533920	240792	1296896	1637152		30678.4	4815.84	25937.9	32743				118	1995904	307088	1623648	2031200		39918.1	6141.76	32473	40624
	119	752000	112342	597568	779616		15040	2246.84	11951.4	15592.3				119	1119072	179500	954800	1187392		22381.4	3590	19096	23747.8				119	1543840	239576	1209120	1651424		30876.8	4791.52	24182.4	33028.5				119	1900544	301200	1581760	2069440		38010.9	6024	31635.2	41388.8
	120	733216	113804	600544	767744		14664.3	2276.08	12010.9	15354.9				120	1140992	173028	922384	1161920		22819.8	3460.56	18447.7	23238.4				120	1552384	245856	1250688	1522560		31047.7	4917.12	25013.8	30451.2				120	1957024	302112	1553024	2005024		39140.5	6042.24	31060.5	40100.5
	121	738528	110828	593520	759632		14770.6	2216.56	11870.4	15192.6				121	1165536	169896	920720	1157856		23310.7	3397.92	18414.4	23157.1				121	1486528	237800	1269184	1627680		29730.6	4756	25383.7	32553.6				121	1971936	307192	1606304	2027904		39438.7	6143.84	32126.1	40558.1
	122	717648	113300	591776	754624		14353	2266	11835.5	15092.5				122	1142304	178136	957184	1205472		22846.1	3562.72	19143.7	24109.4				122	1536288	233344	1262944	1612160		30725.8	4666.88	25258.9	32243.2				122	2023968	296376	1583488	2014080		40479.4	5927.52	31669.8	40281.6
	123	726368	115720	617696	760928		14527.4	2314.4	12353.9	15218.6				123	1137440	169592	919104	1173856		22748.8	3391.84	18382.1	23477.1				123	1524000	245908	1259520	1561632		30480	4918.16	25190.4	31232.6				123	1975648	298000	1578816	1989984		39513	5960	31576.3	39799.7
	124	741264	117134	597360	749680		14825.3	2342.68	11947.2	14993.6				124	1159616	177780	899088	1186336		23192.3	3555.6	17981.8	23726.7				124	1543616	235672	1257152	1625024		30872.3	4713.44	25143	32500.5				124	1993344	298104	1596000	2029184		39866.9	5962.08	31920	40583.7
	125	736368	112292	584944	763824		14727.4	2245.84	11698.9	15276.5				125	1139680	180104	925136	1202176		22793.6	3602.08	18502.7	24043.5				125	1502048	236128	1203616	1566560		30041	4722.56	24072.3	31331.2				125	1944704	305664	1559008	2056288		38894.1	6113.28	31180.2	41125.8
	126	729296	114662	619648	781792		14585.9	2293.24	12393	15635.8				126	1148800	175100	889072	1199488		22976	3502	17781.4	23989.8				126	1558176	243932	1270240	1588448		31163.5	4878.64	25404.8	31769				126	1967296	306784	1566720	2007200		39345.9	6135.68	31334.4	40144
	127	748640	125054	595520	785760		14972.8	2501.08	11910.4	15715.2				127	1161024	177528	913664	1205056		23220.5	3550.56	18273.3	24101.1				127	1560928	233900	1249216	1670176		31218.6	4678	24984.3	33403.5				127	1924640	298456	1625152	2011488		38492.8	5969.12	32503	40229.8
	128	740800	114358	585152	738640		14816	2287.16	11703	14772.8				128	1121472	178388	931264	1179168		22429.4	3567.76	18625.3	23583.4				128	1538272	237852	1220096	1582336		30765.4	4757.04	24401.9	31646.7				128	1952224	311256	1599936	2029248		39044.5	6225.12	31998.7	40585
	129	748640	115116	609280	746016		14972.8	2302.32	12185.6	14920.3				129	1162080	171056	897632	1165120		23241.6	3421.12	17952.6	23302.4				129	1547936	248288	1265760	1574528		30958.7	4965.76	25315.2	31490.6				129	1977312	313592	1602592	2017472		39546.2	6271.84	32051.8	40349.4
	130	731472	111888	592176	781376		14629.4	2237.76	11843.5	15627.5				130	1153280	183192	948976	1169344		23065.6	3663.84	18979.5	23386.9				130	1522816	243984	1254272	1637856		30456.3	4879.68	25085.4	32757.1				130	1917760	316944	1604352	2043328		38355.2	6338.88	32087	40866.6
	131	738176	114106	606448	754688		14763.5	2282.12	12129	15093.8				131	1146016	178084	931776	1214048		22920.3	3561.68	18635.5	24281				131	1523776	240488	1262400	1604704		30475.5	4809.76	25248	32094.1				131	1944544	295160	1596096	2010048		38890.9	5903.2	31921.9	40201
	132	744368	114258	618512	774192		14887.4	2285.16	12370.2	15483.8				132	1167936	181724	936448	1178464		23358.7	3634.48	18729	23569.3				132	1536992	238408	1224704	1582400		30739.8	4768.16	24494.1	31648				132	1973888	305160	1543040	1993696		39477.8	6103.2	30860.8	39873.9
	133	716000	112090	592592	766704		14320	2241.8	11851.8	15334.1				133	1142720	178840	931200	1176960		22854.4	3576.8	18624	23539.2				133	1516512	240232	1230848	1601248		30330.2	4804.64	24617	32025				133	1983104	306024	1611936	2046208		39662.1	6120.48	32238.7	40924.2
	134	741216	120160	601008	761184		14824.3	2403.2	12020.2	15223.7				134	1130208	180460	933648	1181920		22604.2	3609.2	18673	23638.4				134	1531328	243376	1219936	1538048		30626.6	4867.52	24398.7	30761				134	1922816	307088	1613440	2063200		38456.3	6141.76	32268.8	41264
	135	732704	113602	615376	781728		14654.1	2272.04	12307.5	15634.6				135	1134080	175352	930432	1177696		22681.6	3507.04	18608.6	23553.9				135	1516512	245908	1247584	1594304		30330.2	4918.16	24951.7	31886.1				135	1969568	311816	1569312	2016096		39391.4	6236.32	31386.2	40321.9
	136	704096	110224	604192	761440		14081.9	2204.48	12083.8	15228.8				136	1150560	178792	932608	1183712		23011.2	3575.84	18652.2	23674.2				136	1550592	235724	1235360	1634784		31011.8	4714.48	24707.2	32695.7				136	1922272	300184	1612736	2025152		38445.4	6003.68	32254.7	40503
	137	746368	109618	595824	737088		14927.4	2192.36	11916.5	14741.8				137	1131616	172676	924816	1206240		22632.3	3453.52	18496.3	24124.8				137	1546912	241248	1236320	1608288		30938.2	4824.96	24726.4	32165.8				137	1903392	309528	1591680	2000512		38067.8	6190.56	31833.6	40010.2
	138	734144	108358	618208	777600		14682.9	2167.16	12364.2	15552				138	1163552	178792	912000	1153920		23271	3575.84	18240	23078.4				138	1481280	243528	1234304	1609600		29625.6	4870.56	24686.1	32192				138	1969312	309880	1629184	2004384		39386.2	6197.6	32583.7	40087.7
	139	730432	119958	597312	777552		14608.6	2399.16	11946.2	15551				139	1152448	174796	944192	1184192		23049	3495.92	18883.8	23683.8				139	1498080	240992	1272544	1582240		29961.6	4819.84	25450.9	31644.8				139	1940704	304344	1578240	2031744		38814.1	6086.88	31564.8	40634.9
	140	757104	121522	602080	752560		15142.1	2430.44	12041.6	15051.2				140	1138848	177528	928768	1162816		22777	3550.56	18575.4	23256.3				140	1539072	241296	1266880	1596320		30781.4	4825.92	25337.6	31926.4				140	1979744	310032	1550592	2013664		39594.9	6200.64	31011.8	40273.3
	141	719664	111384	596800	777040		14393.3	2227.68	11936	15540.8				141	1145344	175204	911744	1150560		22906.9	3504.08	18234.9	23011.2				141	1534912	245200	1250592	1576704		30698.2	4904	25011.8	31534.1				141	1972256	304496	1595072	2060736		39445.1	6089.92	31901.4	41214.7
	142	735648	106794	574128	753440		14713	2135.88	11482.6	15068.8				142	1140608	180964	953024	1200000		22812.2	3619.28	19060.5	24000				142	1575680	234864	1220896	1626080		31513.6	4697.28	24417.9	32521.6				142	1928064	296424	1606464	1996512		38561.3	5928.48	32129.3	39930.2
	143	761600	115318	605328	762944		15232	2306.36	12106.6	15258.9				143	1143872	170552	911952	1194400		22877.4	3411.04	18239	23888				143	1546752	239068	1254336	1598688		30935	4781.36	25086.7	31973.8				143	1973344	302112	1572192	2008960		39466.9	6042.24	31443.8	40179.2
	144	724256	110576	603520	761024		14485.1	2211.52	12070.4	15220.5				144	1165184	182028	909296	1164736		23303.7	3640.56	18185.9	23294.7				144	1525856	244692	1247328	1578656		30517.1	4893.84	24946.6	31573.1				144	1979200	315016	1604032	2029536		39584	6300.32	32080.6	40590.7
	145	731824	120664	589472	769696		14636.5	2413.28	11789.4	15393.9				145	1141248	173280	923056	1194496		22825	3465.6	18461.1	23889.9				145	1541920	235824	1200640	1599872		30838.4	4716.48	24012.8	31997.4				145	1977984	303632	1564128	2054368		39559.7	6072.64	31282.6	41087.4
	146	725696	118546	627760	748032		14513.9	2370.92	12555.2	14960.6				146	1138432	177276	903808	1183616		22768.6	3545.52	18076.2	23672.3				146	1551008	244592	1242336	1582496		31020.2	4891.84	24846.7	31649.9				146	2003904	299776	1581696	1996672		40078.1	5995.52	31633.9	39933.4
	147	721520	112544	599824	777248		14430.4	2250.88	11996.5	15545				147	1143328	172724	920400	1199328		22866.6	3454.48	18408	23986.6				147	1565440	236180	1240000	1600512		31308.8	4723.6	24800	32010.2				147	1985568	300536	1586432	2040896		39711.4	6010.72	31728.6	40817.9
	148	756336	114612	606816	745552		15126.7	2292.24	12136.3	14911				148	1128032	173636	932560	1191168		22560.6	3472.72	18651.2	23823.4				148	1516480	232632	1286016	1591360		30329.6	4652.64	25720.3	31827.2				148	1983520	299928	1611520	2032000		39670.4	5998.56	32230.4	40640
	149	723888	118394	618304	798624		14477.8	2367.88	12366.1	15972.5				149	1136640	177728	923936	1170656		22732.8	3554.56	18478.7	23413.1				149	1581120	230812	1261888	1589920		31622.4	4616.24	25237.8	31798.4				149	2005824	306528	1569056	1997312		40116.5	6130.56	31381.1	39946.2
	150	757824	111838	606960	782304		15156.5	2236.76	12139.2	15646.1				150	1173088	174648	929808	1168256		23461.8	3492.96	18596.2	23365.1				150	1515360	231620	1264288	1607200		30307.2	4632.4	25285.8	32144				150	1943904	297392	1618592	2045920		38878.1	5947.84	32371.8	40918.4
	151	756544	116830	591408	755248		15130.9	2336.6	11828.2	15105				151	1131456	176768	920720	1199008		22629.1	3535.36	18414.4	23980.2				151	1549952	228580	1237408	1599168		30999	4571.6	24748.2	31983.4				151	1913440	300944	1565504	1955360		38268.8	6018.88	31310.1	39107.2
	152	718944	117990	613488	772080		14378.9	2359.8	12269.8	15441.6				152	1151872	175860	924560	1181664		23037.4	3517.2	18491.2	23633.3				152	1502432	247528	1241984	1617952		30048.6	4950.56	24839.7	32359				152	2001376	300384	1553920	2058784		40027.5	6007.68	31078.4	41175.7
	153	731680	114358	594752	776048		14633.6	2287.16	11895	15521				153	1136480	186276	905248	1177952		22729.6	3725.52	18105	23559				153	1570656	234000	1250368	1582816		31413.1	4680	25007.4	31656.3				153	1948480	290232	1603808	2031616		38969.6	5804.64	32076.2	40632.3
	154	742976	115418	592848	760768		14859.5	2308.36	11857	15215.4				154	1151296	184404	922384	1167776		23025.9	3688.08	18447.7	23355.5				154	1517536	239728	1242080	1595520		30350.7	4794.56	24841.6	31910.4				154	1957440	294600	1607200	2003680		39148.8	5892	32144	40073.6
	155	738784	112694	617536	781120		14775.7	2253.88	12350.7	15622.4				155	1155584	176060	932352	1210240		23111.7	3521.2	18647	24204.8				155	1546112	241448	1244608	1565696		30922.2	4828.96	24892.2	31313.9				155	1969184	312368	1601504	2034432		39383.7	6247.36	32030.1	40688.6
	156	747824	113502	587776	767072		14956.5	2270.04	11755.5	15341.4				156	1153856	178032	934640	1149824		23077.1	3560.64	18692.8	22996.5				156	1545152	236636	1256160	1612512		30903	4732.72	25123.2	32250.2				156	1942432	308560	1595712	2012480		38848.6	6171.2	31914.2	40249.6
	157	753488	117890	580848	740544		15069.8	2357.8	11617	14810.9				157	1126592	184708	937024	1182048		22531.8	3694.16	18740.5	23641				157	1560352	244896	1252896	1599136		31207	4897.92	25057.9	31982.7				157	1941536	300488	1598208	1998080		38830.7	6009.76	31964.2	39961.6
	158	733424	123186	604192	767072		14668.5	2463.72	12083.8	15341.4				158	1122272	183492	941184	1173024		22445.4	3669.84	18823.7	23460.5				158	1578240	241856	1269280	1568352		31564.8	4837.12	25385.6	31367				158	1915936	300232	1575904	2010272		38318.7	6004.64	31518.1	40205.4
	159	757680	115822	590288	759072		15153.6	2316.44	11805.8	15181.4				159	1130208	185820	904416	1188576		22604.2	3716.4	18088.3	23771.5				159	1500992	244540	1247872	1577376		30019.8	4890.8	24957.4	31547.5				159	1894176	301960	1606048	2056416		37883.5	6039.2	32121	41128.3
	160	756224	120714	620256	777248		15124.5	2414.28	12405.1	15545				160	1122880	178840	925488	1214368		22457.6	3576.8	18509.8	24287.4				160	1535616	238460	1230656	1580992		30712.3	4769.2	24613.1	31619.8				160	1935808	307392	1582688	2027744		38716.2	6147.84	31653.8	40554.9
	161	731984	115822	600704	765056		14639.7	2316.44	12014.1	15301.1				161	1138592	184556	897984	1187744		22771.8	3691.12	17959.7	23754.9				161	1563904	244236	1250272	1595616		31278.1	4884.72	25005.4	31912.3				161	1928672	303480	1606400	1994208		38573.4	6069.6	32128	39884.2
	162	754736	110778	598544	760512		15094.7	2215.56	11970.9	15210.2				162	1135616	179500	920192	1184224		22712.3	3590	18403.8	23684.5				162	1496064	242816	1238560	1609024		29921.3	4856.32	24771.2	32180.5				162	1971520	304400	1572544	2014560		39430.4	6088	31450.9	40291.2
	163	738128	118950	596752	784736		14762.6	2379	11935	15694.7				163	1134752	172624	915056	1193152		22695	3452.48	18301.1	23863				163	1560832	237952	1244544	1573824		31216.6	4759.04	24890.9	31476.5				163	2004768	306736	1570848	2038816		40095.4	6134.72	31417	40776.3
	164	733744	113300	594496	784208		14674.9	2266	11889.9	15684.2				164	1150464	186124	907536	1185376		23009.3	3722.48	18150.7	23707.5				164	1512608	232836	1261888	1585152		30252.2	4656.72	25237.8	31703				164	1955040	308000	1591616	2064256		39100.8	6160	31832.3	41285.1
	165	751424	117486	598704	742656		15028.5	2349.72	11974.1	14853.1				165	1122464	179852	947824	1178720		22449.3	3597.04	18956.5	23574.4				165	1573472	243324	1237632	1606560		31469.4	4866.48	24752.6	32131.2				165	1963040	300688	1580256	1991232		39260.8	6013.76	31605.1	39824.6
	166	752976	117386	604448	772080		15059.5	2347.72	12089	15441.6				166	1118400	173836	931824	1176992		22368	3476.72	18636.5	23539.8				166	1553696	229492	1252736	1595232		31073.9	4589.84	25054.7	31904.6				166	1989440	306680	1590944	1985568		39788.8	6133.6	31818.9	39711.4
	167	736880	111534	596800	776368		14737.6	2230.68	11936	15527.4				167	1127712	179752	931824	1177312		22554.2	3595.04	18636.5	23546.2				167	1515520	240536	1256736	1612512		30310.4	4810.72	25134.7	32250.2				167	1952864	307344	1611360	2036576		39057.3	6146.88	32227.2	40731.5
	168	752352	116628	583360	748752		15047	2332.56	11667.2	14975				168	1136032	172876	923152	1170560		22720.6	3457.52	18463	23411.2				168	1527456	236636	1276384	1614432		30549.1	4732.72	25527.7	32288.6				168	1966944	309224	1572352	2070560		39338.9	6184.48	31447	41411.2
	169	727760	114056	621952	772912		14555.2	2281.12	12439	15458.2				169	1134976	174648	920304	1187232		22699.5	3492.96	18406.1	23744.6				169	1561632	239928	1258880	1596160		31232.6	4798.56	25177.6	31923.2				169	1997440	303632	1567200	2045440		39948.8	6072.64	31344	40908.8
	170	718736	112090	601728	762896		14374.7	2241.8	12034.6	15257.9				170	1141824	179248	911424	1160576		22836.5	3584.96	18228.5	23211.5				170	1540480	242056	1252064	1608640		30809.6	4841.12	25041.3	32172.8				170	1932224	303944	1580160	2018848		38644.5	6078.88	31603.2	40377
	171	747104	109416	606448	751584		14942.1	2188.32	12129	15031.7				171	1151232	174240	924352	1193344		23024.6	3484.8	18487	23866.9				171	1545952	242260	1251968	1612160		30919	4845.2	25039.4	32243.2				171	1943072	310800	1607168	2012896		38861.4	6216	32143.4	40257.9
	172	739456	111636	617232	769856		14789.1	2232.72	12344.6	15397.1				172	1149888	174848	951264	1213760		22997.8	3496.96	19025.3	24275.2				172	1539584	230508	1250912	1554784		30791.7	4610.16	25018.2	31095.7				172	1952768	294144	1599712	2007776		39055.4	5882.88	31994.2	40155.5
	173	745552	116578	599776	756896		14911	2331.56	11995.5	15137.9				173	1129184	183140	933488	1189952		22583.7	3662.8	18669.8	23799				173	1536992	241956	1255936	1569952		30739.8	4839.12	25118.7	31399				173	1930976	296016	1561888	2030816		38619.5	5920.32	31237.8	40616.3
	174	732704	115570	596848	760208		14654.1	2311.4	11937	15204.2				174	1159680	174292	924144	1152704		23193.6	3485.84	18482.9	23054.1				174	1529792	239120	1212288	1576480		30595.8	4782.4	24245.8	31529.6				174	1942176	306072	1581280	2001376		38843.5	6121.44	31625.6	40027.5
	175	738320	114308	593920	794032		14766.4	2286.16	11878.4	15880.6				175	1173376	176416	952608	1186496		23467.5	3528.32	19052.2	23729.9				175	1555136	235420	1277248	1587744		31102.7	4708.4	25545	31754.9				175	1929472	299424	1585536	2000832		38589.4	5988.48	31710.7	40016.6
	176	747200	119000	595936	770992		14944	2380	11918.7	15419.8				176	1140608	182128	924048	1188704		22812.2	3642.56	18481	23774.1				176	1550432	237344	1236160	1585152		31008.6	4746.88	24723.2	31703				176	1952704	306984	1588288	2004128		39054.1	6139.68	31765.8	40082.6
	177	736784	117890	579616	757984		14735.7	2357.8	11592.3	15159.7				177	1134816	175252	902032	1166272		22696.3	3505.04	18040.6	23325.4				177	1498656	248644	1261312	1550624		29973.1	4972.88	25226.2	31012.5				177	1950944	310648	1606080	2018784		39018.9	6212.96	32121.6	40375.7
	178	728480	115570	604656	775232		14569.6	2311.4	12093.1	15504.6				178	1152768	189156	948768	1161728		23055.4	3783.12	18975.4	23234.6				178	1491456	236888	1224448	1573152		29829.1	4737.76	24489	31463				178	1958112	299672	1579424	2026560		39162.2	5993.44	31588.5	40531.2
	179	709968	114864	595616	769024		14199.4	2297.28	11912.3	15380.5				179	1176160	176668	892496	1179008		23523.2	3533.36	17849.9	23580.2				179	1557312	236484	1245824	1590848		31146.2	4729.68	24916.5	31817				179	1931936	312168	1558528	2015328		38638.7	6243.36	31170.6	40306.6
	180	747664	118898	599216	752560		14953.3	2377.96	11984.3	15051.2				180	1141632	178284	948400	1185696		22832.6	3565.68	18968	23713.9				180	1537888	241296	1273024	1620352		30757.8	4825.92	25460.5	32407				180	1950880	300792	1598048	2009088		39017.6	6015.84	31961	40181.8
	181	725280	111584	608192	776928		14505.6	2231.68	12163.8	15538.6				181	1143328	167268	930640	1176576		22866.6	3345.36	18612.8	23531.5				181	1531424	224532	1243616	1630144		30628.5	4490.64	24872.3	32602.9				181	1952928	308360	1566976	2034816		39058.6	6167.2	31339.5	40696.3
	182	744464	113754	582336	731104		14889.3	2275.08	11646.7	14622.1				182	1134752	175152	911840	1193024		22695	3503.04	18236.8	23860.5				182	1542400	233192	1235584	1581600		30848	4663.84	24711.7	31632				182	1955616	313488	1576960	1991552		39112.3	6269.76	31539.2	39831
	183	755296	113854	611488	782048		15105.9	2277.08	12229.8	15641				183	1136800	181420	936496	1162080		22736	3628.4	18729.9	23241.6				183	1505184	237040	1272448	1571392		30103.7	4740.8	25449	31427.8				183	1948736	306632	1592224	2001568		38974.7	6132.64	31844.5	40031.4
	184	738944	115822	614608	766960		14778.9	2316.44	12292.2	15339.2				184	1154912	179904	939472	1171968		23098.2	3598.08	18789.4	23439.4				184	1531104	234560	1216384	1619392		30622.1	4691.2	24327.7	32387.8				184	1962560	290536	1575424	2008576		39251.2	5810.72	31508.5	40171.5
	185	736672	117588	581664	770576		14733.4	2351.76	11633.3	15411.5				185	1149408	176616	913456	1187904		22988.2	3532.32	18269.1	23758.1				185	1508160	247376	1242464	1557568		30163.2	4947.52	24849.3	31151.4				185	1965760	301048	1552800	2067744		39315.2	6020.96	31056	41354.9
	186	726576	117788	583712	763088		14531.5	2355.76	11674.2	15261.8				186	1150464	182432	925600	1193088		23009.3	3648.64	18512	23861.8				186	1571168	241248	1224032	1586144		31423.4	4824.96	24480.6	31722.9				186	1947872	305056	1607520	2046752		38957.4	6101.12	32150.4	40935
	187	736160	112796	591616	777648		14723.2	2255.92	11832.3	15553				187	1143968	183340	933280	1191296		22879.4	3666.8	18665.6	23825.9				187	1547392	241296	1275168	1579616		30947.8	4825.92	25503.4	31592.3				187	1926240	296680	1607840	2051936		38524.8	5933.6	32156.8	41038.7
	188	745184	114056	585056	775184		14903.7	2281.12	11701.1	15503.7				188	1145184	179904	934992	1203168		22903.7	3598.08	18699.8	24063.4				188	1544256	235216	1245760	1569408		30885.1	4704.32	24915.2	31388.2				188	1939648	300184	1574880	2013760		38793	6003.68	31497.6	40275.2
	189	726832	115216	600544	767072		14536.6	2304.32	12010.9	15341.4				189	1170976	183392	929648	1206048		23419.5	3667.84	18593	24121				189	1527616	249608	1265824	1620256		30552.3	4992.16	25316.5	32405.1				189	1961024	311352	1610944	2005024		39220.5	6227.04	32218.9	40100.5
	190	722800	116528	595360	770480		14456	2330.56	11907.2	15409.6				190	1117472	172876	912576	1164480		22349.4	3457.52	18251.5	23289.6				190	1552608	234356	1247872	1601376		31052.2	4687.12	24957.4	32027.5				190	1916576	288712	1623104	2073920		38331.5	5774.24	32462.1	41478.4
	191	738848	119302	598800	781536		14777	2386.04	11976	15630.7				191	1119712	175352	928240	1188576		22394.2	3507.04	18564.8	23771.5				191	1543584	234912	1248192	1551584		30871.7	4698.24	24963.8	31031.7				191	1927968	296016	1550528	2010624		38559.4	5920.32	31010.6	40212.5
	192	730752	117386	614208	749216		14615	2347.72	12284.2	14984.3				192	1151360	171360	925232	1156320		23027.2	3427.2	18504.6	23126.4				192	1509056	243324	1275488	1635552		30181.1	4866.48	25509.8	32711				192	1930912	314608	1601088	2041920		38618.2	6292.16	32021.8	40838.4
	193	727344	116174	595984	773216		14546.9	2323.48	11919.7	15464.3				193	1145344	178084	938368	1169408		22906.9	3561.68	18767.4	23388.2				193	1543104	234864	1249536	1609024		30862.1	4697.28	24990.7	32180.5				193	1937664	307088	1592576	2063040		38753.3	6141.76	31851.5	41260.8
	194	745504	120160	610608	759584		14910.1	2403.2	12212.2	15191.7				194	1133312	177832	934272	1182880		22666.2	3556.64	18685.4	23657.6				194	1567136	243476	1241312	1592256		31342.7	4869.52	24826.2	31845.1				194	1954016	292872	1566176	2026016		39080.3	5857.44	31323.5	40520.3
	195	729408	109972	597728	776464		14588.2	2199.44	11954.6	15529.3				195	1132448	180916	939056	1200288		22649	3618.32	18781.1	24005.8				195	1524736	234608	1254848	1554720		30494.7	4692.16	25097	31094.4				195	1938464	297800	1602048	2051488		38769.3	5956	32041	41029.8
	196	727760	111434	595472	783344		14555.2	2228.68	11909.4	15666.9				196	1149568	179500	917968	1190304		22991.4	3590	18359.4	23806.1				196	1525120	236888	1248320	1577824		30502.4	4737.76	24966.4	31556.5				196	1913664	308104	1599168	2025728		38273.3	6162.08	31983.4	40514.6
	197	734672	120412	588240	763664		14693.4	2408.24	11764.8	15273.3				197	1163808	173536	875328	1183072		23276.2	3470.72	17506.6	23661.4				197	1542496	249404	1234944	1558816		30849.9	4988.08	24698.9	31176.3				197	1960320	302368	1583648	1982176		39206.4	6047.36	31673	39643.5
	198	728784	113652	589664	760048		14575.7	2273.04	11793.3	15201				198	1138336	177984	932720	1208096		22766.7	3559.68	18654.4	24161.9				198	1518752	239472	1242912	1622752		30375	4789.44	24858.2	32455				198	1939584	303888	1599232	2018304		38791.7	6077.76	31984.6	40366.1
	199	721104	112946	585312	787568		14422.1	2258.92	11706.2	15751.4				199	1154688	178136	929488	1172384		23093.8	3562.72	18589.8	23447.7				199	1542464	244488	1229536	1593824		30849.3	4889.76	24590.7	31876.5				199	1975232	301296	1542464	2006112		39504.6	6025.92	30849.3	40122.2
	200	740240	116024	593472	764640		14804.8	2320.48	11869.4	15292.8				200	1124992	178236	912416	1170496		22499.8	3564.72	18248.3	23409.9				200	1535200	236280	1236832	1594912		30704	4725.6	24736.6	31898.2				200	1964032	314304	1590560	2032160		39280.6	6286.08	31811.2	40643.2
	201	731216	115318	596336	781216		14624.3	2306.36	11926.7	15624.3				201	1125152	179196	910752	1202176		22503	3583.92	18215	24043.5				201	1522944	224732	1263840	1627264		30458.9	4494.64	25276.8	32545.3				201	1939744	298712	1581792	2044896		38794.9	5974.24	31635.8	40897.9
	202	731616	119554	593008	765008		14632.3	2391.08	11860.2	15300.2				202	1131520	174848	925280	1180416		22630.4	3496.96	18505.6	23608.3				202	1536672	239472	1239104	1589568		30733.4	4789.44	24782.1	31791.4				202	1968992	306024	1565216	2057376		39379.8	6120.48	31304.3	41147.5
	203	741264	118192	604544	746432		14825.3	2363.84	12090.9	14928.6				203	1167264	186880	927520	1161152		23345.3	3737.6	18550.4	23223				203	1546336	245148	1272864	1605280		30926.7	4902.96	25457.3	32105.6				203	1954912	305464	1581920	2029856		39098.2	6109.28	31638.4	40597.1
	204	733632	110526	592080	770992		14672.6	2210.52	11841.6	15419.8				204	1126400	183644	944080	1168672		22528	3672.88	18881.6	23373.4				204	1494592	242108	1251968	1543296		29891.8	4842.16	25039.4	30865.9				204	1900192	292568	1610944	2038912		38003.8	5851.36	32218.9	40778.2
	205	728736	117334	595216	736992		14574.7	2346.68	11904.3	14739.8				205	1139200	182532	881344	1180896		22784	3650.64	17626.9	23617.9				205	1573504	238004	1230688	1560768		31470.1	4760.08	24613.8	31215.4				205	1955744	306480	1547456	2033184		39114.9	6129.6	30949.1	40663.7
	206	740448	114914	606656	759120		14809	2298.28	12133.1	15182.4				206	1160352	173684	942784	1181344		23207	3473.68	18855.7	23626.9				206	1539904	236788	1263680	1589888		30798.1	4735.76	25273.6	31797.8				206	1927008	320344	1589504	2056896		38540.2	6406.88	31790.1	41137.9
	207	723328	116478	591728	755360		14466.6	2329.56	11834.6	15107.2				207	1147424	179296	925968	1202592		22948.5	3585.92	18519.4	24051.8				207	1528608	243832	1265472	1607104		30572.2	4876.64	25309.4	32142.1				207	1900832	309120	1589664	2030912		38016.6	6182.4	31793.3	40618.2
	208	735488	112442	573664	759120		14709.8	2248.84	11473.3	15182.4				208	1138784	169136	926016	1186080		22775.7	3382.72	18520.3	23721.6				208	1582272	250012	1228864	1596512		31645.4	5000.24	24577.3	31930.2				208	1959136	305208	1566080	2004000		39182.7	6104.16	31321.6	40080
	209	752256	118344	581568	765360		15045.1	2366.88	11631.4	15307.2				209	1177728	180208	929392	1170976		23554.6	3604.16	18587.8	23419.5				209	1508800	238664	1281600	1628800		30176	4773.28	25632	32576				209	1983040	313136	1596160	2022496		39660.8	6262.72	31923.2	40449.9
	210	752768	114560	595616	767888		15055.4	2291.2	11912.3	15357.8				210	1107584	179956	940144	1201696		22151.7	3599.12	18802.9	24033.9				210	1513024	244488	1252544	1576768		30260.5	4889.76	25050.9	31535.4				210	1942720	303232	1559072	2075200		38854.4	6064.64	31181.4	41504
	211	731616	114712	600032	755040		14632.3	2294.24	12000.6	15100.8				211	1149824	171916	918592	1168192		22996.5	3438.32	18371.8	23363.8				211	1587712	240944	1249344	1552128		31754.2	4818.88	24986.9	31042.6				211	1982272	302720	1552864	2010848		39645.4	6054.4	31057.3	40217
	212	734880	114106	600752	752976		14697.6	2282.12	12015	15059.5				212	1131264	173536	929760	1158944		22625.3	3470.72	18595.2	23178.9				212	1495392	235572	1260256	1601056		29907.8	4711.44	25205.1	32021.1				212	1906464	308664	1584288	2036960		38129.3	6173.28	31685.8	40739.2
	213	729152	117284	605264	764752		14583	2345.68	12105.3	15295				213	1125888	173940	911840	1210400		22517.8	3478.8	18236.8	24208				213	1514944	240740	1238368	1583168		30298.9	4814.8	24767.4	31663.4				213	1963648	301960	1597600	2050048		39273	6039.2	31952	41001
	214	701120	112946	597728	770832		14022.4	2258.92	11954.6	15416.6				214	1122784	174796	915472	1191680		22455.7	3495.92	18309.4	23833.6				214	1516032	232176	1268704	1633376		30320.6	4643.52	25374.1	32667.5				214	1980928	307600	1556960	2031584		39618.6	6152	31139.2	40631.7
	215	743184	114560	609888	755504		14863.7	2291.2	12197.8	15110.1				215	1111616	184152	949952	1184800		22232.3	3683.04	18999	23696				215	1521600	237648	1300224	1609504		30432	4752.96	26004.5	32190.1				215	1973120	303584	1618048	2036576		39462.4	6071.68	32361	40731.5
	216	739056	120110	602080	777392		14781.1	2402.2	12041.6	15547.8				216	1126080	171664	912880	1184704		22521.6	3433.28	18257.6	23694.1				216	1544576	232936	1225408	1571904		30891.5	4658.72	24508.2	31438.1				216	1920384	304960	1592576	2076896		38407.7	6099.2	31851.5	41537.9
	217	745040	112694	590432	774240		14900.8	2253.88	11808.6	15484.8				217	1169920	174900	907584	1165632		23398.4	3498	18151.7	23312.6				217	1497984	244540	1252640	1602784		29959.7	4890.8	25052.8	32055.7				217	1958816	305816	1551840	2073824		39176.3	6116.32	31036.8	41476.5
	218	739312	112492	612400	771968		14786.2	2249.84	12248	15439.4				218	1149056	176164	941808	1180768		22981.1	3523.28	18836.2	23615.4				218	1489120	233696	1259616	1592480		29782.4	4673.92	25192.3	31849.6				218	1910496	297392	1594240	2022784		38209.9	5947.84	31884.8	40455.7
	219	734352	111434	610768	780128		14687	2228.68	12215.4	15602.6				219	1122304	169944	927424	1166624		22446.1	3398.88	18548.5	23332.5				219	1562848	234912	1239456	1584352		31257	4698.24	24789.1	31687				219	1953088	298048	1582400	2033888		39061.8	5960.96	31648	40677.8
	220	750096	116478	598592	748544		15001.9	2329.56	11971.8	14970.9				220	1167040	178136	909872	1173504		23340.8	3562.72	18197.4	23470.1				220	1527712	237092	1288224	1589088		30554.2	4741.84	25764.5	31781.8				220	1962016	313080	1604448	2030720		39240.3	6261.6	32089	40614.4
	221	737088	112744	596592	789024		14741.8	2254.88	11931.8	15780.5				221	1136384	183748	938272	1193760		22727.7	3674.96	18765.4	23875.2				221	1540640	233496	1233376	1594656		30812.8	4669.92	24667.5	31893.1				221	1891904	303080	1619936	2074560		37838.1	6061.6	32398.7	41491.2
	222	738128	115418	599472	759584		14762.6	2308.36	11989.4	15191.7				222	1143776	176164	920352	1177216		22875.5	3523.28	18407	23544.3				222	1537408	232380	1237888	1605760		30748.2	4647.6	24757.8	32115.2				222	1939904	297440	1539552	2011488		38798.1	5948.8	30791	40229.8
	223	735536	118092	609632	760256		14710.7	2361.84	12192.6	15205.1				223	1147424	173484	922736	1179424		22948.5	3469.68	18454.7	23588.5				223	1559552	229796	1280800	1583168		31191	4595.92	25616	31663.4				223	1983104	304192	1544832	1974240		39662.1	6083.84	30896.6	39484.8
	224	722192	114006	584848	754736		14443.8	2280.12	11697	15094.7				224	1130464	181572	943312	1184192		22609.3	3631.44	18866.2	23683.8				224	1536896	239068	1245440	1590144		30737.9	4781.36	24908.8	31802.9				224	1970816	302720	1571296	2047648		39416.3	6054.4	31425.9	40953
	225	735392	115368	589200	769296		14707.8	2307.36	11784	15385.9				225	1112768	170452	921504	1182496		22255.4	3409.04	18430.1	23649.9				225	1529568	238056	1239456	1592224		30591.4	4761.12	24789.1	31844.5				225	1975776	297288	1575104	2036864		39515.5	5945.76	31502.1	40737.3
	226	743744	115266	589824	760160		14874.9	2305.32	11796.5	15203.2				226	1179456	187792	905616	1174912		23589.1	3755.84	18112.3	23498.2				226	1522720	245400	1283136	1617632		30454.4	4908	25662.7	32352.6				226	1954592	290128	1573568	1976672		39091.8	5802.56	31471.4	39533.4
	227	728896	120362	595472	774448		14577.9	2407.24	11909.4	15489				227	1149888	182936	946992	1173856		22997.8	3658.72	18939.8	23477.1				227	1523776	239676	1235840	1612224		30475.5	4793.52	24716.8	32244.5				227	1915008	302520	1642688	2067968		38300.2	6050.4	32853.8	41359.4
	228	751024	114106	604192	763456		15020.5	2282.12	12083.8	15269.1				228	1136608	171916	896224	1193152		22732.2	3438.32	17924.5	23863				228	1553856	225088	1248800	1550688		31077.1	4501.76	24976	31013.8				228	1960672	305264	1558848	2000512		39213.4	6105.28	31177	40010.2
	229	742656	111636	604752	772080		14853.1	2232.72	12095	15441.6				229	1174272	186628	913968	1189632		23485.4	3732.56	18279.4	23792.6				229	1535040	242056	1289376	1589088		30700.8	4841.12	25787.5	31781.8				229	1988736	305664	1578240	1986176		39774.7	6113.28	31564.8	39723.5
	230	739152	114964	595264	755872		14783	2299.28	11905.3	15117.4				230	1122464	177984	951360	1211904		22449.3	3559.68	19027.2	24238.1				230	1533056	244592	1215904	1589728		30661.1	4891.84	24318.1	31794.6				230	1862816	303632	1600128	2054624		37256.3	6072.64	32002.6	41092.5
	231	738480	112694	599680	768000		14769.6	2253.88	11993.6	15360				231	1122624	184304	915264	1184064		22452.5	3686.08	18305.3	23681.3				231	1570336	237600	1232000	1544064		31406.7	4752	24640	30881.3				231	2001536	298968	1550688	2002016		40030.7	5979.36	31013.8	40040.3
	232	740448	120412	597728	736064		14809	2408.24	11954.6	14721.3				232	1166176	180104	941024	1177440		23323.5	3602.08	18820.5	23548.8				232	1520544	242360	1229216	1633696		30410.9	4847.2	24584.3	32673.9				232	1950144	313336	1595232	2013888		39002.9	6266.72	31904.6	40277.8
	233	734560	117688	621488	748704		14691.2	2353.76	12429.8	14974.1				233	1111456	177832	925760	1184352		22229.1	3556.64	18515.2	23687				233	1521088	236536	1260640	1583328		30421.8	4730.72	25212.8	31666.6				233	1892128	287392	1624928	2051808		37842.6	5747.84	32498.6	41036.2
	234	745088	115066	604656	756592		14901.8	2301.32	12093.1	15131.8				234	1123776	175808	899024	1194304		22475.5	3516.16	17980.5	23886.1				234	1512928	241856	1261152	1567200		30258.6	4837.12	25223	31344				234	1944928	303792	1601792	1935072		38898.6	6075.84	32035.8	38701.4
	235	731152	118192	591984	774768		14623	2363.84	11839.7	15495.4				235	1153184	172220	907584	1182400		23063.7	3444.4	18151.7	23648				235	1529312	232176	1267360	1587712		30586.2	4643.52	25347.2	31754.2				235	1977760	306280	1589120	2028768		39555.2	6125.6	31782.4	40575.4
	236	739360	116932	592432	774304		14787.2	2338.64	11848.6	15486.1				236	1120640	177528	938016	1188640		22412.8	3550.56	18760.3	23772.8				236	1511552	231468	1248864	1613792		30231	4629.36	24977.3	32275.8				236	1955584	302776	1576640	2060448		39111.7	6055.52	31532.8	41209
	237	747760	118394	604288	774240		14955.2	2367.88	12085.8	15484.8				237	1126752	183340	914800	1189984		22535	3666.8	18296	23799.7				237	1570336	243984	1276128	1577280		31406.7	4879.68	25522.6	31545.6				237	2006912	301960	1589344	2008704		40138.2	6039.2	31786.9	40174.1
	238	734304	115066	586944	763248		14686.1	2301.32	11738.9	15265				238	1119168	181168	933696	1163872		22383.4	3623.36	18673.9	23277.4				238	1522976	233848	1246912	1560128		30459.5	4676.96	24938.2	31202.6				238	1968288	305512	1590240	2059392		39365.8	6110.24	31804.8	41187.8
	239	748032	113602	609840	764224		14960.6	2272.04	12196.8	15284.5				239	1104448	175152	924560	1195200		22089	3503.04	18491.2	23904				239	1523840	230708	1252160	1598912		30476.8	4614.16	25043.2	31978.2				239	1927968	285920	1589120	2047296		38559.4	5718.4	31782.4	40945.9
	240	737920	110172	593152	757312		14758.4	2203.44	11863	15146.2				240	1172608	174948	924976	1183712		23452.2	3498.96	18499.5	23674.2				240	1532576	243528	1223072	1554176		30651.5	4870.56	24461.4	31083.5				240	1966240	288960	1541440	1984608		39324.8	5779.2	30828.8	39692.2
	241	724144	115620	612352	763920		14482.9	2312.4	12247	15278.4				241	1137792	176920	929760	1197376		22755.8	3538.4	18595.2	23947.5				241	1538112	240640	1262304	1612320		30762.2	4812.8	25246.1	32246.4				241	1965952	307496	1583232	2001696		39319	6149.92	31664.6	40033.9
	242	710544	117890	595216	769024		14210.9	2357.8	11904.3	15380.5				242	1102656	183848	934160	1174176		22053.1	3676.96	18683.2	23483.5				242	1536416	244236	1240416	1599232		30728.3	4884.72	24808.3	31984.6				242	1925440	302568	1569152	1991488		38508.8	6051.36	31383	39829.8
	243	731472	111584	587264	758240		14629.4	2231.68	11745.3	15164.8				243	1164480	181420	922480	1145440		23289.6	3628.4	18449.6	22908.8				243	1559456	236080	1310432	1543520		31189.1	4721.6	26208.6	30870.4				243	1961536	298968	1593760	2012736		39230.7	5979.36	31875.2	40254.7
	244	739456	115368	612864	755968		14789.1	2307.36	12257.3	15119.4				244	1136480	175708	936400	1186336		22729.6	3514.16	18728	23726.7				244	1479488	244336	1243808	1617088		29589.8	4886.72	24876.2	32341.8				244	1936896	312368	1568032	2023968		38737.9	6247.36	31360.6	40479.4
	245	739312	116276	598656	762832		14786.2	2325.52	11973.1	15256.6				245	1135488	172776	905360	1207104		22709.8	3455.52	18107.2	24142.1				245	1560032	232888	1217248	1550368		31200.6	4657.76	24345	31007.4				245	1911936	300080	1579360	2050560		38238.7	6001.6	31587.2	41011.2
	246	722336	115570	589360	776000		14446.7	2311.4	11787.2	15520				246	1155488	185112	912512	1181408		23109.8	3702.24	18250.2	23628.2				246	1564000	240840	1260096	1621152		31280	4816.8	25201.9	32423				246	1966976	295864	1591680	2008000		39339.5	5917.28	31833.6	40160
	247	744768	107954	597776	749632		14895.4	2159.08	11955.5	14992.6				247	1136064	181924	920672	1171776		22721.3	3638.48	18413.4	23435.5				247	1497824	240588	1270624	1629760		29956.5	4811.76	25412.5	32595.2				247	1921728	311352	1618272	2083712		38434.6	6227.04	32365.4	41674.2
	248	742144	118696	581264	768256		14842.9	2373.92	11625.3	15365.1				248	1163136	168784	887312	1214656		23262.7	3375.68	17746.2	24293.1				248	1557312	241448	1242080	1592960		31146.2	4828.96	24841.6	31859.2				248	1959648	309576	1576320	1992480		39193	6191.52	31526.4	39849.6
	249	717760	112442	609168	768928		14355.2	2248.84	12183.4	15378.6				249	1126080	180460	909920	1161984		22521.6	3609.2	18198.4	23239.7				249	1526112	247984	1284608	1584416		30522.2	4959.68	25692.2	31688.3				249	1997312	302216	1521120	1995264		39946.2	6044.32	30422.4	39905.3
	250	737040	116426	583008	762576		14740.8	2328.52	11660.2	15251.5				250	1142880	171968	940816	1192832		22857.6	3439.36	18816.3	23856.6				250	1492992	231724	1260640	1585664		29859.8	4634.48	25212.8	31713.3				250	1908672	307800	1595392	2052416		38173.4	6156	31907.8	41048.3
	251	732608	111080	598128	762992		14652.2	2221.6	11962.6	15259.8				251	1128288	177024	923728	1164384		22565.8	3540.48	18474.6	23287.7				251	1549952	236840	1230528	1570528		30999	4736.8	24610.6	31410.6				251	1892224	299520	1556192	1967040		37844.5	5990.4	31123.8	39340.8
	252	744000	112140	607120	780800		14880	2242.8	12142.4	15616				252	1169984	179144	913408	1176864		23399.7	3582.88	18268.2	23537.3				252	1554816	242108	1270880	1576640		31096.3	4842.16	25417.6	31532.8				252	2001536	318464	1566496	2006752		40030.7	6369.28	31329.9	40135
	253	756480	114358	590432	762416		15129.6	2287.16	11808.6	15248.3				253	1137120	181724	929072	1171712		22742.4	3634.48	18581.4	23434.2				253	1516352	231724	1227488	1614336		30327	4634.48	24549.8	32286.7				253	1917856	297184	1606240	2083424		38357.1	5943.68	32124.8	41668.5
	254	738896	121774	608144	764176		14777.9	2435.48	12162.9	15283.5				254	1119328	173332	910080	1205664		22386.6	3466.64	18201.6	24113.3				254	1562848	243424	1206080	1557376		31257	4868.48	24121.6	31147.5				254	1970336	294040	1565856	2011328		39406.7	5880.8	31317.1	40226.6
	255	720384	112694	602192	770432		14407.7	2253.88	12043.8	15408.6				255	1146944	174648	911328	1161440		22938.9	3492.96	18226.6	23228.8				255	1529952	237244	1282752	1579456		30599	4744.88	25655	31589.1				255	1987072	306480	1582848	1973824		39741.4	6129.6	31657	39476.5
	256	744576	109064	592128	774144		14891.5	2181.28	11842.6	15482.9				256	1140096	186932	946736	1172224		22801.9	3738.64	18934.7	23444.5				256	1512480	241248	1220192	1597440		30249.6	4824.96	24403.8	31948.8				256	1953536	304648	1582656	2041184		39070.7	6092.96	31653.1	40823.7
	257	735744	112292	619024	785408		14714.9	2245.84	12380.5	15708.2				257	1147424	183340	917040	1170816		22948.5	3666.8	18340.8	23416.3				257	1578496	246112	1244384	1606720		31569.9	4922.24	24887.7	32134.4				257	1952288	311864	1560608	2017984		39045.8	6237.28	31212.2	40359.7
	258	733632	110324	598336	771872		14672.6	2206.48	11966.7	15437.4				258	1152544	183392	929968	1184384		23050.9	3667.84	18599.4	23687.7				258	1478656	249100	1241504	1642688		29573.1	4982	24830.1	32853.8				258	1956224	306328	1614272	1972416		39124.5	6126.56	32285.4	39448.3
	259	756480	119252	592960	772592		15129.6	2385.04	11859.2	15451.8				259	1127136	176112	949072	1178592		22542.7	3522.24	18981.4	23571.8				259	1574272	233444	1233632	1579584		31485.4	4668.88	24672.6	31591.7				259	1908736	313032	1630048	2067808		38174.7	6260.64	32601	41356.2
	260	722192	111988	607168	765824		14443.8	2239.76	12143.4	15316.5				260	1127168	177428	908784	1171872		22543.4	3548.56	18175.7	23437.4				260	1566720	249508	1235328	1607008		31334.4	4990.16	24706.6	32140.2				260	2034336	306280	1578816	2063392		40686.7	6125.6	31576.3	41267.8
	261	732032	115720	587712	765216		14640.6	2314.4	11754.2	15304.3				261	1117408	184860	925072	1181568		22348.2	3697.2	18501.4	23631.4				261	1518688	237700	1272448	1628960		30373.8	4754	25449	32579.2				261	1944960	306024	1594880	1951200		38899.2	6120.48	31897.6	39024
	262	759072	115116	590384	734672		15181.4	2302.32	11807.7	14693.4				262	1130112	177224	927776	1181472		22602.2	3544.48	18555.5	23629.4				262	1552960	239472	1220512	1588352		31059.2	4789.44	24410.2	31767				262	1940544	293992	1569408	2020672		38810.9	5879.84	31388.2	40413.4
	263	743232	111534	606704	765472		14864.6	2230.68	12134.1	15309.4				263	1178720	178388	942848	1165376		23574.4	3567.76	18857	23307.5				263	1541408	236384	1232960	1580896		30828.2	4727.68	24659.2	31617.9				263	1989504	304704	1556992	1991072		39790.1	6094.08	31139.8	39821.4
	264	740080	112896	585456	756752		14801.6	2257.92	11709.1	15135				264	1141920	181776	924096	1181888		22838.4	3635.52	18481.9	23637.8				264	1531328	236888	1271040	1618432		30626.6	4737.76	25420.8	32368.6				264	1980672	310744	1621664	2008800		39613.4	6214.88	32433.3	40176
	265	747360	114762	608192	739984		14947.2	2295.24	12163.8	14799.7				265	1108000	176872	920352	1158720		22160	3537.44	18407	23174.4				265	1579680	243780	1198976	1568160		31593.6	4875.6	23979.5	31363.2				265	1909696	298808	1584256	2072288		38193.9	5976.16	31685.1	41445.8
	266	736464	116880	603264	766960		14729.3	2337.6	12065.3	15339.2				266	1144192	170856	911168	1189120		22883.8	3417.12	18223.4	23782.4				266	1527616	245656	1310048	1570432		30552.3	4913.12	26201	31408.6				266	2014528	293936	1560672	2020032		40290.6	5878.72	31213.4	40400.6
	267	721216	113048	586848	764896		14424.3	2260.96	11737	15297.9				267	1149952	176464	929232	1180160		22999	3529.28	18584.6	23603.2				267	1474080	241500	1271648	1634880		29481.6	4830	25433	32697.6				267	1952864	296784	1616352	2060448		39057.3	5935.68	32327	41209
	268	747824	118042	598912	778528		14956.5	2360.84	11978.2	15570.6				268	1119136	182632	907328	1179872		22382.7	3652.64	18146.6	23597.4				268	1526912	236080	1224960	1556992		30538.2	4721.6	24499.2	31139.8				268	1964608	302160	1626048	2037408		39292.2	6043.2	32521	40748.2
	269	742768	116326	602496	765568		14855.4	2326.52	12049.9	15311.4				269	1137280	173432	926272	1198016		22745.6	3468.64	18525.4	23960.3				269	1549152	245552	1261824	1549312		30983	4911.04	25236.5	30986.2				269	1991296	301760	1548096	1985184		39825.9	6035.2	30961.9	39703.7
	270	730752	108306	601120	733632		14615	2166.12	12022.4	14672.6				270	1155104	182988	948144	1171232		23102.1	3659.76	18962.9	23424.6				270	1539584	241500	1263264	1624352		30791.7	4830	25265.3	32487				270	1948480	297952	1609344	2023744		38969.6	5959.04	32186.9	40474.9
	271	740032	112342	603056	773008		14800.6	2246.84	12061.1	15460.2				271	1109760	173988	922224	1164608		22195.2	3479.76	18444.5	23292.2				271	1555136	230760	1225504	1554016		31102.7	4615.2	24510.1	31080.3				271	1919328	316640	1569376	2019744		38386.6	6332.8	31387.5	40394.9
	272	725232	115822	575312	774448		14504.6	2316.44	11506.2	15489				272	1160672	177428	921920	1148576		23213.4	3548.56	18438.4	22971.5				272	1522240	243780	1252896	1592544		30444.8	4875.6	25057.9	31850.9				272	2026272	301760	1591744	1956160		40525.4	6035.2	31834.9	39123.2
	273	764592	115116	589872	768928		15291.8	2302.32	11797.4	15378.6				273	1126464	183444	924144	1167936		22529.3	3668.88	18482.9	23358.7				273	1522464	232684	1249920	1591360		30449.3	4653.68	24998.4	31827.2				273	1968000	304800	1610976	2033728		39360	6096	32219.5	40674.6
	274	742304	116226	607120	761904		14846.1	2324.52	12142.4	15238.1				274	1134656	179348	930272	1193184		22693.1	3586.96	18605.4	23863.7				274	1594976	236484	1214016	1522560		31899.5	4729.68	24280.3	30451.2				274	2005632	293128	1578720	2030048		40112.6	5862.56	31574.4	40601
	275	728944	111080	599472	767696		14578.9	2221.6	11989.4	15353.9				275	1149376	169388	911632	1149248		22987.5	3387.76	18232.6	22985				275	1527136	238104	1237728	1556576		30542.7	4762.08	24754.6	31131.5				275	1987392	301656	1582336	1986368		39747.8	6033.12	31646.7	39727.4
	276	733584	113602	590128	751168		14671.7	2272.04	11802.6	15023.4				276	1147680	186932	912624	1202880		22953.6	3738.64	18252.5	24057.6				276	1540384	239880	1244128	1581696		30807.7	4797.6	24882.6	31633.9				276	1956768	307296	1606528	2032704		39135.4	6145.92	32130.6	40654.1
	277	750816	112090	593920	768560		15016.3	2241.8	11878.4	15371.2				277	1140032	179296	927888	1197376		22800.6	3585.92	18557.8	23947.5				277	1579136	240080	1223936	1578080		31582.7	4801.6	24478.7	31561.6				277	1939680	298200	1569408	2039136		38793.6	5964	31388.2	40782.7
	278	723328	112846	600032	788448		14466.6	2256.92	12000.6	15769				278	1138272	178588	922224	1163584		22765.4	3571.76	18444.5	23271.7				278	1519008	242312	1273184	1584992		30380.2	4846.24	25463.7	31699.8				278	1976960	300440	1560288	2001728		39539.2	6008.8	31205.8	40034.6
	279	735536	112796	586896	775120		14710.7	2255.92	11737.9	15502.4				279	1124832	178840	914224	1175648		22496.6	3576.8	18284.5	23513				279	1561984	228128	1244864	1601216		31239.7	4562.56	24897.3	32024.3				279	1989280	304040	1634880	2041280		39785.6	6080.8	32697.6	40825.6
	280	739200	115368	595824	756480		14784	2307.36	11916.5	15129.6				280	1126976	172220	917760	1178880		22539.5	3444.4	18355.2	23577.6				280	1544416	244388	1196032	1538528		30888.3	4887.76	23920.6	30770.6				280	1944256	298200	1582080	2038656		38885.1	5964	31641.6	40773.1
	281	737760	110526	614672	780288		14755.2	2210.52	12293.4	15605.8				281	1175104	177072	907856	1154080		23502.1	3541.44	18157.1	23081.6				281	1550144	249000	1260832	1623808		31002.9	4980	25216.6	32476.2				281	1980896	316384	1563424	1993600		39617.9	6327.68	31268.5	39872
	282	750096	113098	609888	756544		15001.9	2261.96	12197.8	15130.9				282	1124768	177224	952656	1188480		22495.4	3544.48	19053.1	23769.6				282	1535072	239068	1237504	1587392		30701.4	4781.36	24750.1	31747.8				282	1958304	297088	1587264	2074784		39166.1	5941.76	31745.3	41495.7
	283	745296	117638	595776	790048		14905.9	2352.76	11915.5	15801				283	1145280	178944	903120	1177856		22905.6	3578.88	18062.4	23557.1				283	1522688	252852	1240288	1616352		30453.8	5057.04	24805.8	32327				283	1938336	299272	1537216	2051008		38766.7	5985.44	30744.3	41020.2
	284	736320	112744	606400	762112		14726.4	2254.88	12128	15242.2				284	1135552	177832	932144	1181184		22711	3556.64	18642.9	23623.7				284	1513504	239576	1271136	1606304		30270.1	4791.52	25422.7	32126.1				284	1997280	304648	1581760	1984064		39945.6	6092.96	31635.2	39681.3
	285	740240	117536	596496	758400		14804.8	2350.72	11929.9	15168				285	1142816	177224	958016	1242400		22856.3	3544.48	19160.3	24848				285	1567456	232328	1238304	1586464		31349.1	4646.56	24766.1	31729.3				285	1952064	290384	1595200	2060992		39041.3	5807.68	31904	41219.8
	286	723328	108812	598752	761232		14466.6	2176.24	11975	15224.6				286	1178432	176212	905984	1169216		23568.6	3524.24	18119.7	23384.3				286	1588192	248644	1238464	1592416		31763.8	4972.88	24769.3	31848.3				286	1988160	303840	1562624	2013536		39763.2	6076.8	31252.5	40270.7
	287	745760	109820	591472	750400		14915.2	2196.4	11829.4	15008				287	1170816	189056	903904	1158464		23416.3	3781.12	18078.1	23169.3				287	1519552	245756	1261408	1583648		30391	4915.12	25228.2	31673				287	1973248	305664	1607584	2008320		39465	6113.28	32151.7	40166.4
	288	755152	115266	605680	745232		15103	2305.32	12113.6	14904.6				288	1132992	174292	917088	1233792		22659.8	3485.84	18341.8	24675.8				288	1514144	240992	1218432	1596096		30282.9	4819.84	24368.6	31921.9				288	1935552	297544	1600608	2086304		38711	5950.88	32012.2	41726.1
	289	730128	114812	613024	781264		14602.6	2296.24	12260.5	15625.3				289	1152800	175152	924192	1162592		23056	3503.04	18483.8	23251.8				289	1569792	243120	1255104	1552768		31395.8	4862.4	25102.1	31055.4				289	1960096	304096	1579040	2003840		39201.9	6081.92	31580.8	40076.8
	290	713168	106542	594336	745184		14263.4	2130.84	11886.7	14903.7				290	1159136	180512	944240	1166944		23182.7	3610.24	18884.8	23338.9				290	1526496	243880	1281632	1619648		30529.9	4877.6	25632.6	32393				290	1955520	307848	1625024	2015104		39110.4	6156.96	32500.5	40302.1
	291	746320	117334	608400	742512		14926.4	2346.68	12168	14850.2				291	1108256	174192	906608	1194560		22165.1	3483.84	18132.2	23891.2				291	1582176	233544	1200960	1574624		31643.5	4670.88	24019.2	31492.5				291	1902976	300288	1616320	2064832		38059.5	6005.76	32326.4	41296.6
	292	731680	117990	615488	785616		14633.6	2359.8	12309.8	15712.3				292	1134400	173332	903648	1195456		22688	3466.64	18073	23909.1				292	1577664	241704	1252736	1558688		31553.3	4834.08	25054.7	31173.8				292	1943936	312880	1540160	1978304		38878.7	6257.6	30803.2	39566.1
	293	722608	120008	579200	764384		14452.2	2400.16	11584	15287.7				293	1156704	182076	919728	1188000		23134.1	3641.52	18394.6	23760				293	1523104	237344	1256800	1622464		30462.1	4746.88	25136	32449.3				293	1951424	304040	1588768	2002336		39028.5	6080.8	31775.4	40046.7
	294	760976	112392	607376	775184		15219.5	2247.84	12147.5	15503.7				294	1113600	182484	929184	1216096		22272	3649.68	18583.7	24321.9				294	1547488	233496	1226496	1579936		30949.8	4669.92	24529.9	31598.7				294	1925824	303176	1593760	2071264		38516.5	6063.52	31875.2	41425.3
	295	730960	113502	595472	733952		14619.2	2270.04	11909.4	14679				295	1127328	174092	906496	1202880		22546.6	3481.84	18129.9	24057.6				295	1525920	239220	1261888	1596000		30518.4	4784.4	25237.8	31920				295	1982336	300896	1578144	1999520		39646.7	6017.92	31562.9	39990.4
	296	747152	111384	590544	744368		14943	2227.68	11810.9	14887.4				296	1129376	178388	945024	1190624		22587.5	3567.76	18900.5	23812.5				296	1548352	239880	1268416	1573952		30967	4797.6	25368.3	31479				296	1926688	314000	1596960	2028768		38533.8	6280	31939.2	40575.4
	297	741520	112998	603120	746688		14830.4	2259.96	12062.4	14933.8				297	1146080	177376	931728	1173920		22921.6	3547.52	18634.6	23478.4				297	1561472	237144	1240928	1625408		31229.4	4742.88	24818.6	32508.2				297	1952992	297288	1574112	2042976		39059.8	5945.76	31482.2	40859.5
	298	734304	112594	620512	775952		14686.1	2251.88	12410.2	15519				298	1146944	174696	906336	1160704		22938.9	3493.92	18126.7	23214.1				298	1555072	241956	1245856	1565504		31101.4	4839.12	24917.1	31310.1				298	1976480	314352	1555520	1989920		39529.6	6287.04	31110.4	39798.4
	299	747824	111584	603936	767584		14956.5	2231.68	12078.7	15351.7				299	1166208	176972	936096	1189312		23324.2	3539.44	18721.9	23786.2				299	1515872	225340	1233312	1614272		30317.4	4506.8	24666.2	32285.4				299	1932704	303944	1611744	1981472		38654.1	6078.88	32234.9	39629.4
	300	739728	122330	601168	714096		14794.6	2446.6	12023.4	14281.9				300	1144544	173128	894368	1182784		22890.9	3462.56	17887.4	23655.7				300	1567552	236432	1245024	1543680		31351	4728.64	24900.5	30873.6				300	1947232	290128	1606944	2027104		38944.6	5802.56	32138.9	40542.1
	301	712448	116780	610000	789328		14249	2335.6	12200	15786.6				301	1136128	174900	931264	1144064		22722.6	3498	18625.3	22881.3				301	1489696	248696	1309568	1596640		29793.9	4973.92	26191.4	31932.8				301	1966496	297800	1577088	1944960		39329.9	5956	31541.8	38899.2
	302	747040	113400	581456	762416		14940.8	2268	11629.1	15248.3				302	1133184	180460	936144	1212128		22663.7	3609.2	18722.9	24242.6				302	1510592	238764	1229024	1640032		30211.8	4775.28	24580.5	32800.6				302	1994400	302416	1602208	2023264		39888	6048.32	32044.2	40465.3
	303	703376	116528	592176	779824		14067.5	2330.56	11843.5	15596.5				303	1130176	180964	918752	1173856		22603.5	3619.28	18375	23477.1				303	1562240	246616	1225184	1605504		31244.8	4932.32	24503.7	32110.1				303	1943424	305416	1602464	2048512		38868.5	6108.32	32049.3	40970.2
	304	726320	116024	606864	765424		14526.4	2320.48	12137.3	15308.5				304	1161760	170452	920976	1179680		23235.2	3409.04	18419.5	23593.6				304	1585664	236536	1262048	1627840		31713.3	4730.72	25241	32556.8				304	1926880	312520	1582560	1981568		38537.6	6250.4	31651.2	39631.4
	305	745184	113956	602704	745088		14903.7	2279.12	12054.1	14901.8				305	1147648	180408	909360	1171936		22953	3608.16	18187.2	23438.7				305	1511008	236484	1267616	1647936		30220.2	4729.68	25352.3	32958.7				305	1919520	301048	1588384	2031136		38390.4	6020.96	31767.7	40622.7
	306	709408	116124	614256	767744		14188.2	2322.48	12285.1	15354.9				306	1140512	177124	906400	1205248		22810.2	3542.48	18128	24105				306	1584768	229644	1216800	1561248		31695.4	4592.88	24336	31225				306	1954752	303128	1575328	2027584		39095	6062.56	31506.6	40551.7
	307	724816	118042	614768	775952		14496.3	2360.84	12295.4	15519				307	1150400	176920	933440	1156384		23008	3538.4	18668.8	23127.7				307	1564544	240992	1291424	1588640		31290.9	4819.84	25828.5	31772.8				307	1957632	294040	1622752	1985408		39152.6	5880.8	32455	39708.2
	308	751584	115116	599264	768048		15031.7	2302.32	11985.3	15361				308	1129696	179448	956032	1186848		22593.9	3588.96	19120.6	23737				308	1521824	228988	1199584	1560864		30436.5	4579.76	23991.7	31217.3				308	1942432	298456	1599776	2026752		38848.6	5969.12	31995.5	40535
	309	747296	113754	607840	760304		14945.9	2275.08	12156.8	15206.1				309	1143872	175304	903744	1183072		22877.4	3506.08	18074.9	23661.4				309	1502368	242768	1238304	1559808		30047.4	4855.36	24766.1	31196.2				309	1933344	301200	1548032	2000608		38666.9	6024	30960.6	40012.2
	310	720080	105634	590896	775120		14401.6	2112.68	11817.9	15502.4				310	1154752	176364	925344	1207456		23095	3527.28	18506.9	24149.1				310	1513760	243832	1284128	1582752		30275.2	4876.64	25682.6	31655				310	1947168	304960	1574464	1985088		38943.4	6099.2	31489.3	39701.8
	311	734608	116578	603216	754016		14692.2	2331.56	12064.3	15080.3				311	1125664	176264	930112	1231680		22513.3	3525.28	18602.2	24633.6				311	1526176	235572	1215584	1562144		30523.5	4711.44	24311.7	31242.9				311	1900384	309832	1599872	2062304		38007.7	6196.64	31997.4	41246.1
	312	736112	114914	612608	784624		14722.2	2298.28	12252.2	15692.5				312	1146080	174900	923632	1185216		22921.6	3498	18472.6	23704.3				312	1548192	248340	1258848	1549888		30963.8	4966.8	25177	30997.8				312	1971136	296224	1568096	2016640		39422.7	5924.48	31361.9	40332.8
	313	732144	116932	593408	779056		14642.9	2338.64	11868.2	15581.1				313	1145440	186984	883840	1169408		22908.8	3739.68	17676.8	23388.2				313	1536832	243880	1266400	1611936		30736.6	4877.6	25328	32238.7				313	1946688	309784	1618432	1978080		38933.8	6195.68	32368.6	39561.6
	314	760976	108812	605168	736112		15219.5	2176.24	12103.4	14722.2				314	1123776	178944	949232	1193184		22475.5	3578.88	18984.6	23863.7				314	1544096	235368	1232000	1570528		30881.9	4707.36	24640	31410.6				314	1900224	296528	1619936	2074880		38004.5	5930.56	32398.7	41497.6
	315	732400	116376	613632	762272		14648	2327.52	12272.6	15245.4				315	1132576	176920	903488	1177632		22651.5	3538.4	18069.8	23552.6				315	1545792	243172	1248480	1566624		30915.8	4863.44	24969.6	31332.5				315	1962208	304552	1577856	2017312		39244.2	6091.04	31557.1	40346.2
	316	735024	109466	576848	764336		14700.5	2189.32	11537	15286.7				316	1132672	176164	920192	1195232		22653.4	3523.28	18403.8	23904.6				316	1509152	245048	1264928	1595232		30183	4900.96	25298.6	31904.6				316	1963904	306224	1611520	2015712		39278.1	6124.48	32230.4	40314.2
	317	733424	113704	602800	763760		14668.5	2274.08	12056	15275.2				317	1137440	181320	941184	1182240		22748.8	3626.4	18823.7	23644.8				317	1580256	235168	1247328	1599488		31605.1	4703.36	24946.6	31989.8				317	1922048	305464	1576480	2021376		38441	6109.28	31529.6	40427.5
	318	739264	116376	625136	773168		14785.3	2327.52	12502.7	15463.4				318	1157216	172724	921296	1159424		23144.3	3454.48	18425.9	23188.5				318	1522240	240232	1272448	1575680		30444.8	4804.64	25449	31513.6				318	1927648	313232	1618976	1997472		38553	6264.64	32379.5	39949.4
	319	738784	111434	598080	772176		14775.7	2228.68	11961.6	15443.5				319	1141728	180156	937072	1193152		22834.6	3603.12	18741.4	23863				319	1527616	234660	1244384	1643008		30552.3	4693.2	24887.7	32860.2				319	1929376	317296	1575488	2012896		38587.5	6345.92	31509.8	40257.9
	320	751536	117890	592336	755296		15030.7	2357.8	11846.7	15105.9				320	1108512	180308	940656	1191680		22170.2	3606.16	18813.1	23833.6				320	1534432	232076	1238944	1579264		30688.6	4641.52	24778.9	31585.3				320	1886592	298808	1567552	2045184		37731.8	5976.16	31351	40903.7
	321	737808	111686	604704	775440		14756.2	2233.72	12094.1	15508.8				321	1147904	177324	924928	1177952		22958.1	3546.48	18498.6	23559				321	1543264	233192	1280128	1579136		30865.3	4663.84	25602.6	31582.7				321	1959808	301704	1583072	1999360		39196.2	6034.08	31661.4	39987.2
	322	740912	113452	572640	758912		14818.2	2269.04	11452.8	15178.2				322	1159360	180308	903232	1189696		23187.2	3606.16	18064.6	23793.9				322	1542560	241856	1266048	1601984		30851.2	4837.12	25321	32039.7				322	1970976	299672	1614592	2011072		39419.5	5993.44	32291.8	40221.4
	323	724144	112644	612208	744576		14482.9	2252.88	12244.2	14891.5				323	1122016	170096	937232	1217792		22440.3	3401.92	18744.6	24355.8				323	1512128	230812	1240096	1548672		30242.6	4616.24	24801.9	30973.4				323	1926880	294544	1585216	2086880		38537.6	5890.88	31704.3	41737.6
	324	709664	116680	607120	745552		14193.3	2333.6	12142.4	14911				324	1171968	182632	908992	1159264		23439.4	3652.64	18179.8	23185.3				324	1554080	244944	1261984	1561088		31081.6	4898.88	25239.7	31221.8				324	2008224	304400	1521120	1985152		40164.5	6088	30422.4	39703
	325	757680	114258	604032	755920		15153.6	2285.16	12080.6	15118.4				325	1142080	176316	921504	1170144		22841.6	3526.32	18430.1	23402.9				325	1521728	223112	1253024	1599456		30434.6	4462.24	25060.5	31989.1				325	1905888	292824	1567712	2022720		38117.8	5856.48	31354.2	40454.4
	326	741840	114510	605120	774048		14836.8	2290.2	12102.4	15481				326	1137312	171460	914288	1173952		22746.2	3429.2	18285.8	23479				326	1547648	234964	1201792	1597632		30953	4699.28	24035.8	31952.6				326	1948896	296480	1569312	2045760		38977.9	5929.6	31386.2	40915.2
	327	724304	112442	609936	787728		14486.1	2248.84	12198.7	15754.6				327	1157856	179904	906864	1176000		23157.1	3598.08	18137.3	23520				327	1512128	246416	1257312	1566464		30242.6	4928.32	25146.2	31329.3				327	1987776	311664	1607168	2003360		39755.5	6233.28	32143.4	40067.2
	328	734256	113552	571712	752512		14685.1	2271.04	11434.2	15050.2				328	1130784	178740	932096	1224864		22615.7	3574.8	18641.9	24497.3				328	1555936	230204	1238048	1562208		31118.7	4604.08	24761	31244.2				328	1897056	312680	1612000	2037120		37941.1	6253.6	32240	40742.4
	329	733888	111534	595216	766864		14677.8	2230.68	11904.3	15337.3				329	1130208	179700	905664	1173760		22604.2	3594	18113.3	23475.2				329	1542816	238156	1211968	1618688		30856.3	4763.12	24239.4	32373.8				329	1932096	301808	1598176	2022624		38641.9	6036.16	31963.5	40452.5
	330	715232	111282	582480	777456		14304.6	2225.64	11649.6	15549.1				330	1121120	181824	890416	1182144		22422.4	3636.48	17808.3	23642.9				330	1544320	241652	1263936	1596192		30886.4	4833.04	25278.7	31923.8				330	1955072	307088	1593024	2017824		39101.4	6141.76	31860.5	40356.5
	331	737552	115620	608352	759120		14751	2312.4	12167	15182.4				331	1162880	178336	933536	1188128		23257.6	3566.72	18670.7	23762.6				331	1512128	228128	1255808	1622624		30242.6	4562.56	25116.2	32452.5				331	1970912	313232	1553376	2089376		39418.2	6264.64	31067.5	41787.5
	332	733216	118646	607120	770640		14664.3	2372.92	12142.4	15412.8				332	1118304	176112	944496	1207200		22366.1	3522.24	18889.9	24144				332	1567552	237192	1256160	1550048		31351	4743.84	25123.2	31001				332	1960672	311560	1573344	2042912		39213.4	6231.2	31466.9	40858.2
	333	717808	114258	598336	803280		14356.2	2285.16	11966.7	16065.6				333	1132096	176568	929344	1173696		22641.9	3531.36	18586.9	23473.9				333	1544512	245200	1254048	1601216		30890.2	4904	25081	32024.3				333	1953216	310592	1572192	2020224		39064.3	6211.84	31443.8	40404.5
	334	758080	116124	598752	739264		15161.6	2322.48	11975	14785.3				334	1155840	172876	919264	1191104		23116.8	3457.52	18385.3	23822.1				334	1541344	241704	1247904	1621408		30826.9	4834.08	24958.1	32428.2				334	1937504	292056	1592224	2076896		38750.1	5841.12	31844.5	41537.9
	335	717808	112090	601056	753600		14356.2	2241.8	12021.1	15072				335	1130592	179448	931152	1170624		22611.8	3588.96	18623	23412.5				335	1566400	236840	1223296	1584448		31328	4736.8	24465.9	31689				335	1963808	300384	1547616	2018720		39276.2	6007.68	30952.3	40374.4
	336	710128	114560	606704	779616		14202.6	2291.2	12134.1	15592.3				336	1158304	179144	922944	1158208		23166.1	3582.88	18458.9	23164.2				336	1529024	238308	1250016	1618016		30580.5	4766.16	25000.3	32360.3				336	1976960	305208	1626560	2041024		39539.2	6104.16	32531.2	40820.5
	337	742144	114106	586176	767696		14842.9	2282.12	11723.5	15353.9				337	1129952	175304	933696	1183488		22599	3506.08	18673.9	23669.8				337	1508192	239272	1254528	1606464		30163.8	4785.44	25090.6	32129.3				337	1944640	311304	1602592	2037792		38892.8	6226.08	32051.8	40755.8
	338	724000	113652	608192	778992		14480	2273.04	12163.8	15579.8				338	1138752	176820	910864	1178208		22775	3536.4	18217.3	23564.2				338	1565760	235876	1228128	1580160		31315.2	4717.52	24562.6	31603.2				338	1965248	302312	1603104	2013504		39305	6046.24	32062.1	40270.1
	339	723376	117184	588128	768256		14467.5	2343.68	11762.6	15365.1				339	1117504	181016	919424	1187264		22350.1	3620.32	18388.5	23745.3				339	1544672	238968	1267552	1589920		30893.4	4779.36	25351	31798.4				339	1967744	303128	1575808	2031360		39354.9	6062.56	31516.2	40627.2
	340	753088	118798	593664	736160		15061.8	2375.96	11873.3	14723.2				340	1159616	175708	925968	1186912		23192.3	3514.16	18519.4	23738.2				340	1520704	236332	1248640	1604960		30414.1	4726.64	24972.8	32099.2				340	1978080	302824	1603104	2009184		39561.6	6056.48	32062.1	40183.7
	341	721984	113098	600752	778272		14439.7	2261.96	12015	15565.4				341	1124608	181368	913712	1186368		22492.2	3627.36	18274.2	23727.4				341	1527296	245856	1251648	1575168		30545.9	4917.12	25033	31503.4				341	1935616	300744	1568672	2013920		38712.3	6014.88	31373.4	40278.4
	342	760928	108760	595008	766352		15218.6	2175.2	11900.2	15327				342	1144352	172724	942064	1182624		22887	3454.48	18841.3	23652.5				342	1515040	236888	1252160	1646432		30300.8	4737.76	25043.2	32928.6				342	1933344	305768	1558752	2017216		38666.9	6115.36	31175	40344.3
	343	744576	119806	598848	751584		14891.5	2396.12	11977	15031.7				343	1137056	176820	931264	1199488		22741.1	3536.4	18625.3	23989.8				343	1563648	235368	1235456	1584992		31273	4707.36	24709.1	31699.8				343	1970688	304600	1584288	2035072		39413.8	6092	31685.8	40701.4
	344	717088	110828	618624	776672		14341.8	2216.56	12372.5	15533.4				344	1124096	176920	939776	1163968		22481.9	3538.4	18795.5	23279.4				344	1549984	239320	1267200	1597632		30999.7	4786.4	25344	31952.6				344	1996992	304856	1537408	2001728		39939.8	6097.12	30748.2	40034.6
	345	734816	113804	579616	757104		14696.3	2276.08	11592.3	15142.1				345	1148992	171564	941600	1192352		22979.8	3431.28	18832	23847				345	1523296	235064	1225088	1593280		30465.9	4701.28	24501.8	31865.6				345	1961536	296328	1571808	1979200		39230.7	5926.56	31436.2	39584
	346	753808	119504	607472	749216		15076.2	2390.08	12149.4	14984.3				346	1124576	174240	922896	1191360		22491.5	3484.8	18457.9	23827.2				346	1521248	236080	1245824	1592864		30425	4721.6	24916.5	31857.3				346	1928736	305416	1562560	2010144		38574.7	6108.32	31251.2	40202.9
	347	719248	106844	603168	782208		14385	2136.88	12063.4	15644.2				347	1126080	183340	897792	1202208		22521.6	3666.8	17955.8	24044.2				347	1570656	242160	1246240	1563648		31413.1	4843.2	24924.8	31273				347	1974464	298104	1581280	2012416		39489.3	5962.08	31625.6	40248.3
	348	747760	112796	576336	757888		14955.2	2255.92	11526.7	15157.8				348	1156896	180764	933744	1179680		23137.9	3615.28	18674.9	23593.6				348	1488864	243984	1249792	1629760		29777.3	4879.68	24995.8	32595.2				348	1936896	301960	1585792	2008800		38737.9	6039.2	31715.8	40176
	349	745648	117536	613840	742560		14913	2350.72	12276.8	14851.2				349	1112608	174192	919168	1183776		22252.2	3483.84	18383.4	23675.5				349	1530464	244640	1229696	1604960		30609.3	4892.8	24593.9	32099.2				349	1967520	293480	1605248	2069056		39350.4	5869.6	32105	41381.1
	350	735600	115116	608864	789120		14712	2302.32	12177.3	15782.4				350	1143616	173384	904992	1186368		22872.3	3467.68	18099.8	23727.4				350	1560128	231620	1260480	1604768		31202.6	4632.4	25209.6	32095.4				350	1927264	302928	1584672	2029024		38545.3	6058.56	31693.4	40580.5
	351	741472	109316	591408	745600		14829.4	2186.32	11828.2	14912				351	1133760	175404	929904	1165216		22675.2	3508.08	18598.1	23304.3				351	1521888	229848	1271872	1551520		30437.8	4596.96	25437.4	31030.4				351	1976896	306936	1586848	1986976		39537.9	6138.72	31737	39739.5
	352	749824	114158	603728	748800		14996.5	2283.16	12074.6	14976				352	1146496	171664	919312	1187552		22929.9	3433.28	18386.2	23751				352	1546240	247732	1224960	1572608		30924.8	4954.64	24499.2	31452.2				352	1982720	299880	1568960	2021056		39654.4	5997.6	31379.2	40421.1
	353	705600	110930	590944	782768		14112	2218.6	11818.9	15655.4				353	1152800	179752	928928	1181984		23056	3595.04	18578.6	23639.7				353	1532416	239168	1262368	1555872		30648.3	4783.36	25247.4	31117.4				353	1946752	311760	1596992	2036704		38935	6235.2	31939.8	40734.1
	354	746064	112240	586896	746176		14921.3	2244.8	11737.9	14923.5				354	1141984	183340	947984	1173440		22839.7	3666.8	18959.7	23468.8				354	1537088	237344	1252064	1595712		30741.8	4746.88	25041.3	31914.2				354	1922688	303584	1557856	2053760		38453.8	6071.68	31157.1	41075.2
	355	724256	110828	600080	763360		14485.1	2216.56	12001.6	15267.2				355	1136320	181824	928192	1193600		22726.4	3636.48	18563.8	23872				355	1539968	243476	1239776	1563648		30799.4	4869.52	24795.5	31273				355	1935328	306936	1610624	2043872		38706.6	6138.72	32212.5	40877.4
	356	737344	109870	595680	776320		14746.9	2197.4	11913.6	15526.4				356	1119648	181824	915328	1183136		22393	3636.48	18306.6	23662.7				356	1523520	237144	1254176	1600608		30470.4	4742.88	25083.5	32012.2				356	1980288	311968	1613216	1993280		39605.8	6239.36	32264.3	39865.6
	357	738128	116376	606704	763408		14762.6	2327.52	12134.1	15268.2				357	1127712	174848	902448	1170880		22554.2	3496.96	18049	23417.6				357	1525856	239880	1263264	1583232		30517.1	4797.6	25265.3	31664.6				357	1927232	301912	1603104	2068128		38544.6	6038.24	32062.1	41362.6
	358	734256	118848	592960	764336		14685.1	2376.96	11859.2	15286.7				358	1135744	176820	901888	1142656		22714.9	3536.4	18037.8	22853.1				358	1554656	234304	1247712	1581856		31093.1	4686.08	24954.2	31637.1				358	1975328	303888	1586144	2020448		39506.6	6077.76	31722.9	40409
	359	729360	111584	590896	779920		14587.2	2231.68	11817.9	15598.4				359	1150368	171764	946224	1161920		23007.4	3435.28	18924.5	23238.4				359	1532864	236484	1249056	1590144		30657.3	4729.68	24981.1	31802.9				359	1948576	306984	1548704	2063808		38971.5	6139.68	30974.1	41276.2
	360	764336	114358	594752	779872		15286.7	2287.16	11895	15597.4				360	1149376	177984	922176	1180736		22987.5	3559.68	18443.5	23614.7				360	1543200	239472	1214048	1600928		30864	4789.44	24281	32018.6				360	1966336	302672	1590048	2050048		39326.7	6053.44	31801	41001
	361	725280	118898	599680	757264		14505.6	2377.96	11993.6	15145.3				361	1151392	176668	905664	1190848		23027.8	3533.36	18113.3	23817				361	1545120	246768	1240832	1610144		30902.4	4935.36	24816.6	32202.9				361	1897440	306984	1615872	2043840		37948.8	6139.68	32317.4	40876.8
	362	736208	110828	593616	769760		14724.2	2216.56	11872.3	15395.2				362	1117888	173940	919424	1172928		22357.8	3478.8	18388.5	23458.6				362	1542400	241856	1241568	1595552		30848	4837.12	24831.4	31911				362	1957408	293784	1603904	1952224		39148.2	5875.68	32078.1	39044.5
	363	749728	114106	612656	747712		14994.6	2282.12	12253.1	14954.2				363	1156960	180104	907536	1190464		23139.2	3602.08	18150.7	23809.3				363	1559168	235928	1270976	1566880		31183.4	4718.56	25419.5	31337.6				363	1955584	313640	1571872	2028672		39111.7	6272.8	31437.4	40573.4
	364	742192	115720	591056	784480		14843.8	2314.4	11821.1	15689.6				364	1138688	173432	942368	1179008		22773.8	3468.64	18847.4	23580.2				364	1544320	241752	1225504	1621312		30886.4	4835.04	24510.1	32426.2				364	1908992	311864	1607008	2009248		38179.8	6237.28	32140.2	40185
	365	728896	106390	608864	752976		14577.9	2127.8	12177.3	15059.5				365	1128544	173788	931616	1190688		22570.9	3475.76	18632.3	23813.8				365	1502016	239472	1245696	1587328		30040.3	4789.44	24913.9	31746.6				365	1940032	309376	1599936	2026016		38800.6	6187.52	31998.7	40520.3
	366	741168	114914	598656	748704		14823.4	2298.28	11973.1	14974.1				366	1126240	180712	937856	1198112		22524.8	3614.24	18757.1	23962.2				366	1509088	241348	1239872	1553824		30181.8	4826.96	24797.4	31076.5				366	1929568	300128	1571808	2024704		38591.4	6002.56	31436.2	40494.1
	367	738528	118242	616000	768880		14770.6	2364.84	12320	15377.6				367	1121952	180712	930944	1180832		22439	3614.24	18618.9	23616.6				367	1530784	236940	1252064	1620448		30615.7	4738.8	25041.3	32409				367	1970528	305816	1592000	2071168		39410.6	6116.32	31840	41423.4
	368	746016	113098	595216	773168		14920.3	2261.96	11904.3	15463.4				368	1109888	172572	916768	1160576		22197.8	3451.44	18335.4	23211.5				368	1570816	239068	1243136	1623264		31416.3	4781.36	24862.7	32465.3				368	1957504	302416	1593440	1991712		39150.1	6048.32	31868.8	39834.2
	369	735648	117386	605008	750400		14713	2347.72	12100.2	15008				369	1139520	184000	943360	1170624		22790.4	3680	18867.2	23412.5				369	1503968	233444	1241504	1594720		30079.4	4668.88	24830.1	31894.4				369	1973760	302928	1547872	2020128		39475.2	6058.56	30957.4	40402.6
	370	717856	115772	616624	776320		14357.1	2315.44	12332.5	15526.4				370	1123328	178136	918064	1180320		22466.6	3562.72	18361.3	23606.4				370	1534336	228024	1260480	1628864		30686.7	4560.48	25209.6	32577.3				370	1950688	307904	1583392	2009344		39013.8	6158.08	31667.8	40186.9
	371	744624	114158	601888	762944		14892.5	2283.16	12037.8	15258.9				371	1154592	177728	900320	1185792		23091.8	3554.56	18006.4	23715.8				371	1514880	237752	1234592	1588512		30297.6	4755.04	24691.8	31770.2				371	1976096	296424	1614656	2032064		39521.9	5928.48	32293.1	40641.3
	372	747664	114510	612464	754944		14953.3	2290.2	12249.3	15098.9				372	1154816	177376	932864	1171872		23096.3	3547.52	18657.3	23437.4				372	1539424	242512	1266976	1597920		30788.5	4850.24	25339.5	31958.4				372	1982720	305008	1580096	2025248		39654.4	6100.16	31601.9	40505
	373	704976	111584	606304	801728		14099.5	2231.68	12126.1	16034.6				373	1141088	171412	928032	1182176		22821.8	3428.24	18560.6	23643.5				373	1527808	242008	1208544	1576864		30556.2	4840.16	24170.9	31537.3				373	1930560	302368	1600992	2068032		38611.2	6047.36	32019.8	41360.6
	374	741424	117284	602144	741936		14828.5	2345.68	12042.9	14838.7				374	1100160	176164	906336	1158880		22003.2	3523.28	18126.7	23177.6				374	1512288	238764	1259008	1588928		30245.8	4775.28	25180.2	31778.6				374	1913664	298560	1559648	2051552		38273.3	5971.2	31193	41031
	375	754688	115418	584336	760624		15093.8	2308.36	11686.7	15212.5				375	1155808	175760	942272	1172512		23116.2	3515.2	18845.4	23450.2				375	1533376	239776	1237568	1604672		30667.5	4795.52	24751.4	32093.4				375	2004128	306176	1568640	2020448		40082.6	6123.52	31372.8	40409
	376	722032	113098	609584	787008		14440.6	2261.96	12191.7	15740.2				376	1112384	179144	905824	1194720		22247.7	3582.88	18116.5	23894.4				376	1480608	237448	1224256	1614560		29612.2	4748.96	24485.1	32291.2				376	1940448	303328	1605504	2030048		38809	6066.56	32110.1	40601
	377	743904	120412	573616	768560		14878.1	2408.24	11472.3	15371.2				377	1143328	183596	901360	1196128		22866.6	3671.92	18027.2	23922.6				377	1548544	243324	1221056	1543040		30970.9	4866.48	24421.1	30860.8				377	1956448	300688	1572352	2053824		39129	6013.76	31447	41076.5
	378	766704	119404	606704	754320		15334.1	2388.08	12134.1	15086.4				378	1135552	178588	912256	1179296		22711	3571.76	18245.1	23585.9				378	1516736	236788	1240672	1630976		30334.7	4735.76	24813.4	32619.5				378	1906240	309224	1550048	1999520		38124.8	6184.48	31001	39990.4
	379	746736	108458	593920	813632		14934.7	2169.16	11878.4	16272.6				379	1126496	172572	922064	1198112		22529.9	3451.44	18441.3	23962.2				379	1533696	236080	1258720	1582112		30673.9	4721.6	25174.4	31642.2				379	1942496	290336	1632704	2053344		38849.9	5806.72	32654.1	41066.9
	380	739776	114258	591984	749472		14795.5	2285.16	11839.7	14989.4				380	1127872	179296	918064	1184064		22557.4	3585.92	18361.3	23681.3				380	1554880	241296	1243296	1579936		31097.6	4825.92	24865.9	31598.7				380	1952928	305056	1587424	2030432		39058.6	6101.12	31748.5	40608.6
	381	735488	112998	616096	755040		14709.8	2259.96	12321.9	15100.8				381	1166336	186376	918896	1206944		23326.7	3727.52	18377.9	24138.9				381	1531680	243424	1251328	1658080		30633.6	4868.48	25026.6	33161.6				381	1918976	310032	1557728	1990912		38379.5	6200.64	31154.6	39818.2
	382	726672	115872	582128	783280		14533.4	2317.44	11642.6	15665.6				382	1160352	178944	927616	1184544		23207	3578.88	18552.3	23690.9				382	1523520	232280	1227808	1581536		30470.4	4645.6	24556.2	31630.7				382	1961696	299368	1598976	2080576		39233.9	5987.36	31979.5	41611.5
	383	738432	114208	578224	769968		14768.6	2284.16	11564.5	15399.4				383	1122016	177324	940032	1190624		22440.3	3546.48	18800.6	23812.5				383	1562688	249000	1258144	1553536		31253.8	4980	25162.9	31070.7				383	1979488	307496	1548544	1998976		39589.8	6149.92	30970.9	39979.5
	384	737920	115014	599728	757936		14758.4	2300.28	11994.6	15158.7				384	1144608	178640	930944	1194496		22892.2	3572.8	18618.9	23889.9				384	1535456	243832	1283328	1594816		30709.1	4876.64	25666.6	31896.3				384	1953312	296328	1624992	1989280		39066.2	5926.56	32499.8	39785.6
	385	720896	115670	603632	759952		14417.9	2313.4	12072.6	15199				385	1151040	177172	913552	1191040		23020.8	3543.44	18271	23820.8				385	1526976	235928	1236992	1593920		30539.5	4718.56	24739.8	31878.4				385	1924320	301656	1565856	2071968		38486.4	6033.12	31317.1	41439.4
	386	755760	109466	589984	745856		15115.2	2189.32	11799.7	14917.1				386	1160128	179600	919104	1155744		23202.6	3592	18382.1	23114.9				386	1549824	244744	1242048	1601568		30996.5	4894.88	24841	32031.4				386	1961056	302160	1616192	1990112		39221.1	6043.2	32323.8	39802.2
	387	707296	119252	601008	765056		14145.9	2385.04	12020.2	15301.1				387	1122528	185060	931728	1184640		22450.6	3701.2	18634.6	23692.8				387	1510688	233900	1253120	1591488		30213.8	4678	25062.4	31829.8				387	1946592	303232	1606208	2029184		38931.8	6064.64	32124.2	40583.7
	388	728896	115670	589664	782720		14577.9	2313.4	11793.3	15654.4				388	1116096	173180	909664	1185024		22321.9	3463.6	18193.3	23700.5				388	1579680	234052	1191456	1609376		31593.6	4681.04	23829.1	32187.5				388	1904800	306984	1551328	2067584		38096	6139.68	31026.6	41351.7
	389	740592	113400	595568	735808		14811.8	2268	11911.4	14716.2				389	1141056	181520	927008	1139360		22821.1	3630.4	18540.2	22787.2				389	1539424	237496	1254528	1590688		30788.5	4749.92	25090.6	31813.8				389	1976480	306432	1585536	1996736		39529.6	6128.64	31710.7	39934.7
	390	740448	109770	584944	764752		14809	2195.4	11698.9	15295				390	1107936	171868	938064	1213024		22158.7	3437.36	18761.3	24260.5				390	1518208	227924	1268448	1591520		30364.2	4558.48	25369	31830.4				390	1916032	303128	1596032	2044160		38320.6	6062.56	31920.6	40883.2
	391	736528	113452	590800	772848		14730.6	2269.04	11816	15457				391	1107104	180208	926896	1179744		22142.1	3604.16	18537.9	23594.9				391	1562720	242920	1253600	1546496		31254.4	4858.4	25072	30929.9				391	1965216	296328	1575840	2065312		39304.3	5926.56	31516.8	41306.2
	392	756480	111736	600400	744976		15129.6	2234.72	12008	14899.5				392	1161344	181220	915728	1143808		23226.9	3624.4	18314.6	22876.2				392	1531744	243832	1289152	1605184		30634.9	4876.64	25783	32103.7				392	1947488	300992	1580736	2012192		38949.8	6019.84	31614.7	40243.8
	393	734768	112544	599888	761392		14695.4	2250.88	11997.8	15227.8				393	1159360	185516	960400	1210816		23187.2	3710.32	19208	24216.3				393	1520064	237144	1259008	1622688		30401.3	4742.88	25180.2	32453.8				393	1973760	305464	1627808	2070496		39475.2	6109.28	32556.2	41409.9
	394	734464	110778	596752	788032		14689.3	2215.56	11935	15760.6				394	1146944	179804	914080	1161152		22938.9	3596.08	18281.6	23223				394	1528096	242564	1221152	1569888		30561.9	4851.28	24423	31397.8				394	1941056	293840	1552960	2004608		38821.1	5876.8	31059.2	40092.2
	395	751376	122986	588432	754784		15027.5	2459.72	11768.6	15095.7				395	1116160	171412	925392	1143456		22323.2	3428.24	18507.8	22869.1				395	1461184	242816	1246176	1615616		29223.7	4856.32	24923.5	32312.3				395	1967904	307848	1560832	2052576		39358.1	6156.96	31216.6	41051.5
	396	737392	120260	616512	755296		14747.8	2405.2	12330.2	15105.9				396	1124832	179652	934272	1199552		22496.6	3593.04	18685.4	23991				396	1521088	243780	1235584	1613632		30421.8	4875.6	24711.7	32272.6				396	1957248	297136	1598976	2058624		39145	5942.72	31979.5	41172.5
	397	717904	112442	575616	779408		14358.1	2248.84	11512.3	15588.2				397	1172672	177528	938016	1171872		23453.4	3550.56	18760.3	23437.4				397	1561184	247428	1194784	1577664		31223.7	4948.56	23895.7	31553.3				397	1946112	302160	1573984	1995232		38922.2	6043.2	31479.7	39904.6
	398	756640	110930	579968	762272		15132.8	2218.6	11599.4	15245.4				398	1140768	173988	939984	1160448		22815.4	3479.76	18799.7	23209				398	1527232	241652	1261984	1592896		30544.6	4833.04	25239.7	31857.9				398	1991136	311968	1624704	1976192		39822.7	6239.36	32494.1	39523.8
	399	723792	114006	601824	765472		14475.8	2280.12	12036.5	15309.4				399	1141248	177984	929072	1200896		22825	3559.68	18581.4	24017.9				399	1528448	232836	1243136	1620928		30569	4656.72	24862.7	32418.6				399	1915104	304752	1628160	2067040		38302.1	6095.04	32563.2	41340.8
	400	739312	107854	583824	767424		14786.2	2157.08	11676.5	15348.5				400	1154272	173332	914848	1159104		23085.4	3466.64	18297	23182.1				400	1544064	240640	1257248	1608640		30881.3	4812.8	25145	32172.8				400	1975616	309224	1569568	2044480		39512.3	6184.48	31391.4	40889.6
	401	740912	117334	599008	763968		14818.2	2346.68	11980.2	15279.4				401	1134240	181420	928240	1150624		22684.8	3628.4	18564.8	23012.5				401	1533600	240688	1283808	1607264		30672	4813.76	25676.2	32145.3				401	1970976	298504	1616448	2004544		39419.5	5970.08	32329	40090.9
	402	735856	114964	624160	769088		14717.1	2299.28	12483.2	15381.8				402	1129280	175656	926176	1214368		22585.6	3513.12	18523.5	24287.4				402	1511392	236028	1258848	1552320		30227.8	4720.56	25177	31046.4				402	1958464	307600	1613056	2037952		39169.3	6152	32261.1	40759
	403	750144	113452	577264	781424		15002.9	2269.04	11545.3	15628.5				403	1136128	179348	919936	1165760		22722.6	3586.96	18398.7	23315.2				403	1590368	243172	1216544	1578720		31807.4	4863.44	24330.9	31574.4				403	1975808	313080	1546240	2024000		39516.2	6261.6	30924.8	40480
	404	737456	118646	604144	747968		14749.1	2372.92	12082.9	14959.4				404	1150080	174192	935056	1179616		23001.6	3483.84	18701.1	23592.3				404	1540448	244136	1227296	1640352		30809	4882.72	24545.9	32807				404	1978944	318720	1619808	2034688		39578.9	6374.4	32396.2	40693.8
	405	719408	112342	600336	781888		14388.2	2246.84	12006.7	15637.8				405	1153664	173280	927680	1181760		23073.3	3465.6	18553.6	23635.2				405	1507392	238208	1216992	1581952		30147.8	4764.16	24339.8	31639				405	1939872	297592	1592896	2045568		38797.4	5951.84	31857.9	40911.4
	406	744720	116880	582128	768768		14894.4	2337.6	11642.6	15375.4				406	1153184	185668	923008	1175712		23063.7	3713.36	18460.2	23514.2				406	1603968	243728	1250848	1551840		32079.4	4874.56	25017	31036.8				406	2013824	297544	1568800	1979168		40276.5	5950.88	31376	39583.4
	407	729568	114762	599424	771776		14591.4	2295.24	11988.5	15435.5				407	1143616	179600	939312	1181312		22872.3	3592	18786.2	23626.2				407	1514880	243832	1240128	1570208		30297.6	4876.64	24802.6	31404.2				407	1939040	298200	1628544	2020416		38780.8	5964	32570.9	40408.3
	408	726720	117638	607536	775536		14534.4	2352.76	12150.7	15510.7				408	1125600	173280	909504	1191264		22512	3465.6	18190.1	23825.3				408	1573248	233040	1229952	1617056		31465	4660.8	24599	32341.1				408	1956064	299576	1568512	2082176		39121.3	5991.52	31370.2	41643.5
	409	744112	113300	591776	732912		14882.2	2266	11835.5	14658.2				409	1143296	178136	912368	1168352		22865.9	3562.72	18247.4	23367				409	1585152	244388	1256640	1555136		31703	4887.76	25132.8	31102.7				409	2018336	310240	1579040	1983136		40366.7	6204.8	31580.8	39662.7
	410	750816	116174	604400	754112		15016.3	2323.48	12088	15082.2				410	1137376	182432	948560	1201536		22747.5	3648.64	18971.2	24030.7				410	1487872	236992	1262784	1583328		29757.4	4739.84	25255.7	31666.6				410	1930080	316128	1580992	2020736		38601.6	6322.56	31619.8	40414.7
	411	718320	110526	601008	774144		14366.4	2210.52	12020.2	15482.9				411	1154816	173584	924608	1163008		23096.3	3471.68	18492.2	23260.2				411	1508352	234660	1221664	1556832		30167	4693.2	24433.3	31136.6				411	1958688	301760	1533504	2034976		39173.8	6035.2	30670.1	40699.5
	412	731728	112492	585712	749936		14634.6	2249.84	11714.2	14998.7				412	1165536	178284	925072	1159616		23310.7	3565.68	18501.4	23192.3				412	1555072	251684	1258208	1583072		31101.4	5033.68	25164.2	31661.4				412	1958272	301552	1541184	1992192		39165.4	6031.04	30823.7	39843.8
	413	724864	118646	604192	761552		14497.3	2372.92	12083.8	15231				413	1129056	176060	925600	1158464		22581.1	3521.2	18512	23169.3				413	1522944	232176	1239680	1588800		30458.9	4643.52	24793.6	31776				413	1992512	307648	1590720	2068288		39850.2	6152.96	31814.4	41365.8
	414	723264	118294	599520	781376		14465.3	2365.88	11990.4	15627.5				414	1116512	173940	952976	1185504		22330.2	3478.8	19059.5	23710.1				414	1560544	229444	1251328	1528832		31210.9	4588.88	25026.6	30576.6				414	1901632	293688	1534080	2036416		38032.6	5873.76	30681.6	40728.3
	415	722752	120312	606960	778176		14455	2406.24	12139.2	15563.5				415	1141984	181116	924464	1153696		22839.7	3622.32	18489.3	23073.9				415	1537312	235928	1250752	1580000		30746.2	4718.56	25015	31600				415	1971072	303688	1582080	1960256		39421.4	6073.76	31641.6	39205.1
	416	730592	115266	609072	770368		14611.8	2305.32	12181.4	15407.4				416	1134304	182888	919584	1223520		22686.1	3657.76	18391.7	24470.4				416	1485728	234104	1223520	1633344		29714.6	4682.08	24470.4	32666.9				416	1947296	312320	1599136	1988704		38945.9	6246.4	31982.7	39774.1
	417	724512	115166	601936	761488		14490.2	2303.32	12038.7	15229.8				417	1168192	172724	944560	1177152		23363.8	3454.48	18891.2	23543				417	1591168	238056	1207040	1546112		31823.4	4761.12	24140.8	30922.2				417	1947872	309680	1597600	2102848		38957.4	6193.6	31952	42057
	418	722608	111838	584896	755152		14452.2	2236.76	11697.9	15103				418	1157984	174444	936816	1172192		23159.7	3488.88	18736.3	23443.8				418	1538752	247884	1290752	1617568		30775	4957.68	25815	32351.4				418	2017280	302008	1567712	2006816		40345.6	6040.16	31354.2	40136.3
	419	735696	116932	580800	778528		14713.9	2338.64	11616	15570.6				419	1128128	177072	893792	1190464		22562.6	3541.44	17875.8	23809.3				419	1500928	241144	1246336	1605728		30018.6	4822.88	24926.7	32114.6				419	1878688	296424	1613856	2039616		37573.8	5928.48	32277.1	40792.3
	420	728832	113198	601632	766448		14576.6	2263.96	12032.6	15329				420	1151040	181420	931728	1192832		23020.8	3628.4	18634.6	23856.6				420	1545056	238156	1233312	1593984		30901.1	4763.12	24666.2	31879.7				420	1918976	309784	1576224	2033632		38379.5	6195.68	31524.5	40672.6
	421	728016	113704	585056	750352		14560.3	2274.08	11701.1	15007				421	1164160	179904	954224	1179040		23283.2	3598.08	19084.5	23580.8				421	1506176	246212	1268128	1600736		30123.5	4924.24	25362.6	32014.7				421	2004448	304496	1563744	1981472		40089	6089.92	31274.9	39629.4
	422	727296	116628	591872	776720		14545.9	2332.56	11837.4	15534.4				422	1135328	174192	929488	1211008		22706.6	3483.84	18589.8	24220.2				422	1475680	242108	1246432	1598112		29513.6	4842.16	24928.6	31962.2				422	1976512	315728	1591008	2040192		39530.2	6314.56	31820.2	40803.8
	423	713280	115922	595680	780960		14265.6	2318.44	11913.6	15619.2				423	1146592	172372	900320	1174752		22931.8	3447.44	18006.4	23495				423	1586368	244944	1242784	1568320		31727.4	4898.88	24855.7	31366.4				423	1988096	303232	1563648	2033312		39761.9	6064.64	31273	40666.2
	424	762528	114560	604448	765936		15250.6	2291.2	12089	15318.7				424	1139584	186880	924560	1154688		22791.7	3737.6	18491.2	23093.8				424	1539104	243020	1274720	1621824		30782.1	4860.4	25494.4	32436.5				424	1975936	308152	1569632	2026432		39518.7	6163.04	31392.6	40528.6
	425	741376	115418	611376	782256		14827.5	2308.36	12227.5	15645.1				425	1139424	179904	920400	1189536		22788.5	3598.08	18408	23790.7				425	1489856	238664	1245088	1635264		29797.1	4773.28	24901.8	32705.3				425	1937440	296480	1601312	2075584		38748.8	5929.6	32026.2	41511.7
	426	748896	114158	597312	734464		14977.9	2283.16	11946.2	14689.3				426	1121056	175152	922272	1175008		22421.1	3503.04	18445.4	23500.2				426	1528384	238360	1255680	1586592		30567.7	4767.2	25113.6	31731.8				426	1992320	305208	1582752	1991008		39846.4	6104.16	31655	39820.2
	427	714352	119050	607424	734880		14287	2381	12148.5	14697.6				427	1137792	175808	930640	1184448		22755.8	3516.16	18612.8	23689				427	1524416	238864	1231584	1621568		30488.3	4777.28	24631.7	32431.4				427	1978880	300744	1584416	1986752		39577.6	6014.88	31688.3	39735
	428	730592	114914	602608	755872		14611.8	2298.28	12052.2	15117.4				428	1117824	171460	930320	1196224		22356.5	3429.2	18606.4	23924.5				428	1541824	232024	1239424	1623328		30836.5	4640.48	24788.5	32466.6				428	1911296	293840	1589760	2069056		38225.9	5876.8	31795.2	41381.1
	429	747296	118748	602800	761760		14945.9	2374.96	12056	15235.2				429	1149248	185464	887408	1162496		22985	3709.28	17748.2	23249.9				429	1587872	244640	1240928	1571712		31757.4	4892.8	24818.6	31434.2				429	1953056	318720	1560224	1996288		39061.1	6374.4	31204.5	39925.8
	430	728784	113956	606304	752816		14575.7	2279.12	12126.1	15056.3				430	1129632	172624	927728	1180320		22592.6	3452.48	18554.6	23606.4				430	1556032	242412	1265088	1621184		31120.6	4848.24	25301.8	32423.7				430	2008864	292672	1585408	2037280		40177.3	5853.44	31708.2	40745.6
	431	738848	111888	624224	768720		14777	2237.76	12484.5	15374.4				431	1128608	174696	923888	1227584		22572.2	3493.92	18477.8	24551.7				431	1534880	233748	1224128	1576000		30697.6	4674.96	24482.6	31520				431	1898880	295712	1554144	2016352		37977.6	5914.24	31082.9	40327
	432	736320	111332	609792	768416		14726.4	2226.64	12195.8	15368.3				432	1145760	176364	925856	1143616		22915.2	3527.28	18517.1	22872.3				432	1566496	250620	1254848	1581120		31329.9	5012.4	25097	31622.4				432	1987136	302160	1612000	1980224		39742.7	6043.2	32240	39604.5
	433	746064	113250	587200	757104		14921.3	2265	11744	15142.1				433	1110080	180512	940448	1176576		22201.6	3610.24	18809	23531.5				433	1519648	230152	1240992	1630784		30393	4603.04	24819.8	32615.7				433	1939104	312120	1591584	2031744		38782.1	6242.4	31831.7	40634.9
	434	727712	110878	583008	774400		14554.2	2217.56	11660.2	15488				434	1124896	168784	913344	1210976		22497.9	3375.68	18266.9	24219.5				434	1532256	239168	1219360	1594560		30645.1	4783.36	24387.2	31891.2				434	1951584	295256	1553536	2054528		39031.7	5905.12	31070.7	41090.6
	435	741888	113904	593520	755760		14837.8	2278.08	11870.4	15115.2				435	1148736	173180	918272	1155808		22974.7	3463.6	18365.4	23116.2				435	1546592	246112	1262112	1561728		30931.8	4922.24	25242.2	31234.6				435	1964128	307600	1585824	1977120		39282.6	6152	31716.5	39542.4
	436	731520	110980	598752	758496		14630.4	2219.6	11975	15169.9				436	1136864	183192	941328	1173536		22737.3	3663.84	18826.6	23470.7				436	1556160	234456	1256672	1642528		31123.2	4689.12	25133.4	32850.6				436	1959488	299424	1583232	2040416		39189.8	5988.48	31664.6	40808.3
	437	742144	114258	607072	769136		14842.9	2285.16	12141.4	15382.7				437	1117824	176012	886224	1239424		22356.5	3520.24	17724.5	24788.5				437	1539744	235420	1200064	1586848		30794.9	4708.4	24001.3	31737				437	1948416	299368	1554304	2026272		38968.3	5987.36	31086.1	40525.4
	438	741264	115720	595104	758608		14825.3	2314.4	11902.1	15172.2				438	1149568	176872	928864	1144544		22991.4	3537.44	18577.3	22890.9				438	1546176	241956	1261376	1571488		30923.5	4839.12	25227.5	31429.8				438	1995712	294544	1537216	2001536		39914.2	5890.88	30744.3	40030.7
	439	726880	114208	612208	744976		14537.6	2284.16	12244.2	14899.5				439	1123200	182888	945392	1218208		22464	3657.76	18907.8	24364.2				439	1528608	242564	1261312	1627648		30572.2	4851.28	25226.2	32553				439	1957120	308816	1623808	2055168		39142.4	6176.32	32476.2	41103.4
	440	749632	112240	577664	778480		14992.6	2244.8	11553.3	15569.6				440	1140256	174696	928032	1179776		22805.1	3493.92	18560.6	23595.5				440	1588384	237852	1230272	1581120		31767.7	4757.04	24605.4	31622.4				440	1956448	290032	1559872	2031616		39129	5800.64	31197.4	40632.3
	441	737968	114258	588432	762368		14759.4	2285.16	11768.6	15247.4				441	1173664	180964	930784	1178304		23473.3	3619.28	18615.7	23566.1				441	1541504	238256	1266560	1577184		30830.1	4765.12	25331.2	31543.7				441	1939104	302216	1584288	1944800		38782.1	6044.32	31685.8	38896
	442	721568	120312	602192	777600		14431.4	2406.24	12043.8	15552				442	1136032	177580	917504	1174080		22720.6	3551.6	18350.1	23481.6				442	1499616	238916	1260000	1627808		29992.3	4778.32	25200	32556.2				442	1970048	308968	1614720	2041184		39401	6179.36	32294.4	40823.7
	443	734880	111636	604032	763872		14697.6	2232.72	12080.6	15277.4				443	1153280	183544	896896	1187232		23065.6	3670.88	17937.9	23744.6				443	1574112	233040	1227296	1585824		31482.2	4660.8	24545.9	31716.5				443	1924352	300032	1573088	2043072		38487	6000.64	31461.8	40861.4
	444	729504	117840	595984	759328		14590.1	2356.8	11919.7	15186.6				444	1184192	180104	896480	1176224		23683.8	3602.08	17929.6	23524.5				444	1530528	246872	1291104	1546592		30610.6	4937.44	25822.1	30931.8				444	1976096	318568	1608544	1962144		39521.9	6371.36	32170.9	39242.9
	445	749216	113956	599520	759280		14984.3	2279.12	11990.4	15185.6				445	1113376	173080	937280	1200864		22267.5	3461.6	18745.6	24017.3				445	1505184	235116	1214112	1581760		30103.7	4702.32	24282.2	31635.2				445	1962624	303944	1582272	2029568		39252.5	6078.88	31645.4	40591.4
	446	735648	115670	607216	781792		14713	2313.4	12144.3	15635.8				446	1178624	171008	942272	1178432		23572.5	3420.16	18845.4	23568.6				446	1545760	237496	1265152	1556320		30915.2	4749.92	25303	31126.4				446	1985472	294696	1544160	2024352		39709.4	5893.92	30883.2	40487
	447	730496	111736	595312	772080		14609.9	2234.72	11906.2	15441.6				447	1144032	176060	931776	1150656		22880.6	3521.2	18635.5	23013.1				447	1550624	246720	1269888	1585824		31012.5	4934.4	25397.8	31716.5				447	1980448	305264	1594336	1981056		39609	6105.28	31886.7	39621.1
	448	738064	113300	594128	755408		14761.3	2266	11882.6	15108.2				448	1108320	180056	941952	1188416		22166.4	3601.12	18839	23768.3				448	1546848	227012	1265184	1580032		30937	4540.24	25303.7	31600.6				448	1905376	304648	1623072	2041888		38107.5	6092.96	32461.4	40837.8
	449	733952	107400	600960	786384		14679	2148	12019.2	15727.7				449	1147072	176060	900480	1185024		22941.4	3521.2	18009.6	23700.5				449	1548192	235520	1246400	1542784		30963.8	4710.4	24928	30855.7				449	1922912	300184	1539648	2024768		38458.2	6003.68	30793	40495.4
	450	754272	118394	600032	762688		15085.4	2367.88	12000.6	15253.8				450	1154912	184708	921392	1191360		23098.2	3694.16	18427.8	23827.2				450	1520128	239576	1248224	1617728		30402.6	4791.52	24964.5	32354.6				450	2025152	294144	1587648	2008224		40503	5882.88	31753	40164.5
	451	725280	114358	595104	778528		14505.6	2287.16	11902.1	15570.6				451	1143232	177124	952816	1223648		22864.6	3542.48	19056.3	24473				451	1530400	234812	1231840	1566240		30608	4696.24	24636.8	31324.8				451	1910656	302824	1571712	2046688		38213.1	6056.48	31434.2	40933.8
	452	718368	111080	596848	754576		14367.4	2221.6	11937	15091.5				452	1138944	175352	924560	1156320		22778.9	3507.04	18491.2	23126.4				452	1582080	236536	1224672	1552384		31641.6	4730.72	24493.4	31047.7				452	1953056	291448	1552896	2015008		39061.1	5828.96	31057.9	40300.2
	453	738640	119958	591056	752000		14772.8	2399.16	11821.1	15040				453	1156128	176164	938528	1174400		23122.6	3523.28	18770.6	23488				453	1511104	237144	1270400	1634464		30222.1	4742.88	25408	32689.3				453	1962208	306984	1596960	2022016		39244.2	6139.68	31939.2	40440.3
	454	721264	117486	595728	774304		14425.3	2349.72	11914.6	15486.1				454	1118336	171968	955680	1196864		22366.7	3439.36	19113.6	23937.3				454	1573728	242160	1215360	1610624		31474.6	4843.2	24307.2	32212.5				454	1918304	311304	1570432	2031360		38366.1	6226.08	31408.6	40627.2
	455	739872	103366	581264	745808		14797.4	2067.32	11625.3	14916.2				455	1149888	173028	912464	1168096		22997.8	3460.56	18249.3	23361.9				455	1561568	247224	1264096	1560224		31231.4	4944.48	25281.9	31204.5				455	1968160	294344	1553184	2043776		39363.2	5886.88	31063.7	40875.5
	456	731888	121622	597520	757568		14637.8	2432.44	11950.4	15151.4				456	1157120	175404	950688	1178368		23142.4	3508.08	19013.8	23567.4				456	1502752	246112	1276512	1625728		30055	4922.24	25530.2	32514.6				456	1959456	311760	1586208	2020672		39189.1	6235.2	31724.2	40413.4
	457	735488	116578	610512	751072		14709.8	2331.56	12210.2	15021.4				457	1121440	174240	914224	1169888		22428.8	3484.8	18284.5	23397.8				457	1551808	236992	1237312	1562688		31036.2	4739.84	24746.2	31253.8				457	1907584	297848	1569632	2091104		38151.7	5956.96	31392.6	41822.1
	458	740032	115014	608448	777760		14800.6	2300.28	12169	15555.2				458	1147648	173280	914432	1160096		22953	3465.6	18288.6	23201.9				458	1509216	238460	1276288	1563264		30184.3	4769.2	25525.8	31265.3				458	2033984	289320	1531520	1990464		40679.7	5786.4	30630.4	39809.3
	459	712288	111332	583664	776832		14245.8	2226.64	11673.3	15536.6				459	1140768	175960	923216	1201152		22815.4	3519.2	18464.3	24023				459	1517568	241400	1271040	1611904		30351.4	4828	25420.8	32238.1				459	1959168	304040	1599328	2023264		39183.4	6080.8	31986.6	40465.3
	460	750656	112998	608704	765424		15013.1	2259.96	12174.1	15308.5				460	1132896	177580	908416	1204576		22657.9	3551.6	18168.3	24091.5				460	1532320	240384	1219104	1590080		30646.4	4807.68	24382.1	31801.6				460	1928512	306528	1558816	2031616		38570.2	6130.56	31176.3	40632.3
	461	730288	111838	607584	759424		14605.8	2236.76	12151.7	15188.5				461	1151040	175908	880048	1153824		23020.8	3518.16	17601	23076.5				461	1548032	238156	1256160	1601312		30960.6	4763.12	25123.2	32026.2				461	1959392	322632	1592800	1999744		39187.8	6452.64	31856	39994.9
	462	742400	112998	602032	764336		14848	2259.96	12040.6	15286.7				462	1134304	178388	939152	1161856		22686.1	3567.76	18783	23237.1				462	1484672	241904	1277600	1589344		29693.4	4838.08	25552	31786.9				462	1999808	302112	1612256	2011168		39996.2	6042.24	32245.1	40223.4
	463	731152	113552	588432	744464		14623	2271.04	11768.6	14889.3				463	1130880	172928	922384	1191456		22617.6	3458.56	18447.7	23829.1				463	1549568	239980	1222304	1579456		30991.4	4799.6	24446.1	31589.1				463	1963392	294600	1594624	2056128		39267.8	5892	31892.5	41122.6
	464	724464	113048	590640	756336		14489.3	2260.96	11812.8	15126.7				464	1160448	175052	924304	1152096		23209	3501.04	18486.1	23041.9				464	1522208	239624	1242784	1561152		30444.2	4792.48	24855.7	31223				464	1976640	307088	1591904	1952192		39532.8	6141.76	31838.1	39043.8
	465	735856	115972	602608	760304		14717.1	2319.44	12052.2	15206.1				465	1155488	174796	960144	1223136		23109.8	3495.92	19202.9	24462.7				465	1540224	237192	1276384	1604064		30804.5	4743.84	25527.7	32081.3				465	1980128	303944	1586304	2034112		39602.6	6078.88	31726.1	40682.2
	466	733008	118042	587568	764752		14660.2	2360.84	11751.4	15295				466	1148480	162920	895552	1188320		22969.6	3258.4	17911	23766.4				466	1574272	231420	1217888	1582496		31485.4	4628.4	24357.8	31649.9				466	1878752	289216	1585952	2059872		37575	5784.32	31719	41197.4
	467	745760	113602	593920	766144		14915.2	2272.04	11878.4	15322.9				467	1171968	180712	916624	1149888		23439.4	3614.24	18332.5	22997.8				467	1542976	229444	1243968	1576384		30859.5	4588.88	24879.4	31527.7				467	1959712	306480	1571168	1987360		39194.2	6129.6	31423.4	39747.2
	468	725536	108862	601568	740848		14510.7	2177.24	12031.4	14817				468	1101568	175000	962384	1227744		22031.4	3500	19247.7	24554.9				468	1552640	230964	1248800	1640160		31052.8	4619.28	24976	32803.2				468	1906688	304296	1596032	2013344		38133.8	6085.92	31920.6	40266.9
	469	736112	114308	611120	767376		14722.2	2286.16	12222.4	15347.5				469	1116768	173888	902032	1179360		22335.4	3477.76	18040.6	23587.2				469	1569856	238208	1264608	1588352		31397.1	4764.16	25292.2	31767				469	1922016	299216	1572672	2059744		38440.3	5984.32	31453.4	41194.9
	470	742352	114612	590800	748224		14847	2292.24	11816	14964.5				470	1136480	181976	927424	1162080		22729.6	3639.52	18548.5	23241.6				470	1503232	238764	1251072	1601792		30064.6	4775.28	25021.4	32035.8				470	1983104	299168	1592096	1996928		39662.1	5983.36	31841.9	39938.6
	471	743744	111534	619088	768560		14874.9	2230.68	12381.8	15371.2				471	1105760	180308	949600	1198080		22115.2	3606.16	18992	23961.6				471	1505408	237144	1231744	1616032		30108.2	4742.88	24634.9	32320.6				471	1937152	306280	1583968	2063648		38743	6125.6	31679.4	41273
	472	724192	118798	604144	756640		14483.8	2375.96	12082.9	15132.8				472	1127808	173888	903184	1183808		22556.2	3477.76	18063.7	23676.2				472	1584992	241956	1230016	1580256		31699.8	4839.12	24600.3	31605.1				472	1921248	307752	1564736	2017696		38425	6155.04	31294.7	40353.9
	473	746064	109618	591408	759216		14921.3	2192.36	11828.2	15184.3				473	1163968	179248	927056	1177728		23279.4	3584.96	18541.1	23554.6				473	1504448	241248	1283168	1632096		30089	4824.96	25663.4	32641.9				473	1953312	304192	1570976	1988640		39066.2	6083.84	31419.5	39772.8
	474	734880	116276	603776	760304		14697.6	2325.52	12075.5	15206.1				474	1123168	171816	969664	1201120		22463.4	3436.32	19393.3	24022.4				474	1568096	233496	1248064	1598368		31361.9	4669.92	24961.3	31967.4				474	1892512	302312	1605984	2040160		37850.2	6046.24	32119.7	40803.2
	475	739200	116226	595360	769440		14784	2324.52	11907.2	15388.8				475	1140992	170352	913408	1189280		22819.8	3407.04	18268.2	23785.6				475	1545536	230508	1206048	1544800		30910.7	4610.16	24121	30896				475	1895840	302520	1580992	2024672		37916.8	6050.4	31619.8	40493.4
	476	753184	116528	603936	768256		15063.7	2330.56	12078.7	15365.1				476	1154112	182784	929344	1170048		23082.2	3655.68	18586.9	23401				476	1566624	241600	1272288	1626304		31332.5	4832	25445.8	32526.1				476	1970112	307648	1562528	2028832		39402.2	6152.96	31250.6	40576.6
	477	742448	116326	595616	743072		14849	2326.52	11912.3	14861.4				477	1107328	180612	942064	1186816		22146.6	3612.24	18841.3	23736.3				477	1498016	236788	1198848	1589440		29960.3	4735.76	23977	31788.8				477	1942656	301608	1610176	2098688		38853.1	6032.16	32203.5	41973.8
	478	736832	114964	617072	784320		14736.6	2299.28	12341.4	15686.4				478	1132448	176920	924864	1160832		22649	3538.4	18497.3	23216.6				478	1565184	242464	1239456	1563104		31303.7	4849.28	24789.1	31262.1				478	1958816	295712	1558976	2002880		39176.3	5914.24	31179.5	40057.6
	479	743024	114258	595680	770224		14860.5	2285.16	11913.6	15404.5				479	1156704	177880	924976	1162720		23134.1	3557.6	18499.5	23254.4				479	1533024	242008	1252480	1593504		30660.5	4840.16	25049.6	31870.1				479	1960256	300384	1583168	2044864		39205.1	6007.68	31663.4	40897.3
	480	760416	114258	595312	776512		15208.3	2285.16	11906.2	15530.2				480	1139168	172424	909568	1202752		22783.4	3448.48	18191.4	24055				480	1529248	239220	1233152	1563104		30585	4784.4	24663	31262.1				480	1977472	314608	1611904	2040736		39549.4	6292.16	32238.1	40814.7
	481	756752	114812	612768	778528		15135	2296.24	12255.4	15570.6				481	1156160	173332	927776	1171296		23123.2	3466.64	18555.5	23425.9				481	1568000	242360	1238784	1594016		31360	4847.2	24775.7	31880.3				481	1982752	308152	1542880	2018176		39655	6163.04	30857.6	40363.5
	482	749984	114712	609280	772032		14999.7	2294.24	12185.6	15440.6				482	1152096	182028	912464	1165024		23041.9	3640.56	18249.3	23300.5				482	1517536	231064	1276544	1624128		30350.7	4621.28	25530.9	32482.6				482	1930432	309320	1566784	2031840		38608.6	6186.4	31335.7	40636.8
	483	744976	114914	575920	781216		14899.5	2298.28	11518.4	15624.3				483	1125504	177124	907856	1172448		22510.1	3542.48	18157.1	23449				483	1527968	232836	1231680	1582016		30559.4	4656.72	24633.6	31640.3				483	1965920	315976	1560544	2049920		39318.4	6319.52	31210.9	40998.4
	484	727040	114914	598544	761024		14540.8	2298.28	11970.9	15220.5				484	1160448	188044	914176	1170400		23209	3760.88	18283.5	23408				484	1547328	243324	1260096	1561152		30946.6	4866.48	25201.9	31223				484	1952128	310592	1533376	2048256		39042.6	6211.84	30667.5	40965.1
	485	738736	117486	609216	770688		14774.7	2349.72	12184.3	15413.8				485	1135872	178740	911840	1200896		22717.4	3574.8	18236.8	24017.9				485	1503072	229088	1241728	1597760		30061.4	4581.76	24834.6	31955.2				485	1971232	312424	1534880	2013216		39424.6	6248.48	30697.6	40264.3
	486	732864	114106	587568	779568		14657.3	2282.12	11751.4	15591.4				486	1077408	169592	887984	1178592		21548.2	3391.84	17759.7	23571.8				486	1539264	230304	1232480	1579904		30785.3	4606.08	24649.6	31598.1				486	1930400	298000	1589344	2033568		38608	5960	31786.9	40671.4
	487	729152	117436	603936	768000		14583	2348.72	12078.7	15360				487	1147520	172828	905520	1173760		22950.4	3456.56	18110.4	23475.2				487	1540960	252800	1234624	1552896		30819.2	5056	24692.5	31057.9				487	1974208	297288	1543424	2034976		39484.2	5945.76	30868.5	40699.5
	488	731360	114812	576384	770784		14627.2	2296.24	11527.7	15415.7				488	1119456	179044	936352	1185184		22389.1	3580.88	18727	23703.7				488	1508416	235520	1259776	1581760		30168.3	4710.4	25195.5	31635.2				488	1994400	302312	1598656	1968448		39888	6046.24	31973.1	39369
	489	754784	112998	602400	757472		15095.7	2259.96	12048	15149.4				489	1160192	171764	915536	1178304		23203.8	3435.28	18310.7	23566.1				489	1563168	234560	1230272	1608960		31263.4	4691.2	24605.4	32179.2				489	1916096	298456	1558816	2058080		38321.9	5969.12	31176.3	41161.6
	490	722704	114662	608960	746432		14454.1	2293.24	12179.2	14928.6				490	1172800	180964	923056	1162336		23456	3619.28	18461.1	23246.7				490	1540128	234000	1286016	1565536		30802.6	4680	25720.3	31310.7				490	1984160	304296	1573664	2000832		39683.2	6085.92	31473.3	40016.6
	491	737552	112090	600080	778480		14751	2241.8	12001.6	15569.6				491	1125184	180104	940656	1176384		22503.7	3602.08	18813.1	23527.7				491	1536896	239624	1261376	1621184		30737.9	4792.48	25227.5	32423.7				491	1949376	303080	1624384	2068672		38987.5	6061.6	32487.7	41373.4
	492	740128	108710	605936	763760		14802.6	2174.2	12118.7	15275.2				492	1121536	169492	901984	1151712		22430.7	3389.84	18039.7	23034.2				492	1558176	232684	1237312	1605024		31163.5	4653.68	24746.2	32100.5				492	1920832	305968	1573952	2007520		38416.6	6119.36	31479	40150.4
	493	721056	113754	612768	775488		14421.1	2275.08	12255.4	15509.8				493	1137888	178740	901312	1146784		22757.8	3574.8	18026.2	22935.7				493	1523200	240080	1252416	1597472		30464	4801.6	25048.3	31949.4				493	1969408	298048	1576000	1975776		39388.2	5960.96	31520	39515.5
	494	720336	113552	599424	792016		14406.7	2271.04	11988.5	15840.3				494	1144384	172980	957696	1207616		22887.7	3459.6	19153.9	24152.3				494	1507232	245756	1229184	1641440		30144.6	4915.12	24583.7	32828.8				494	1961280	303736	1574848	2023488		39225.6	6074.72	31497	40469.8
	495	731360	113754	596336	758192		14627.2	2275.08	11926.7	15163.8				495	1139776	176616	913200	1178688		22795.5	3532.32	18264	23573.8				495	1568000	230608	1248448	1567456		31360	4612.16	24969	31349.1				495	1967040	305208	1580736	2045024		39340.8	6104.16	31614.7	40900.5
	496	728368	116932	596448	760768		14567.4	2338.64	11929	15215.4				496	1096832	173384	923984	1179200		21936.6	3467.68	18479.7	23584				496	1517376	237800	1268032	1571232		30347.5	4756	25360.6	31424.6				496	1926464	301704	1611840	2004928		38529.3	6034.08	32236.8	40098.6
	497	737712	113602	609584	758080		14754.2	2272.04	12191.7	15161.6				497	1115776	175152	926592	1213856		22315.5	3503.04	18531.8	24277.1				497	1545216	236484	1264160	1607104		30904.3	4729.68	25283.2	32142.1				497	1958816	304904	1590624	2015328		39176.3	6098.08	31812.5	40306.6
	498	731824	117840	586896	747104		14636.5	2356.8	11737.9	14942.1				498	1132416	178436	926064	1198112		22648.3	3568.72	18521.3	23962.2				498	1555296	233952	1213280	1549408		31105.9	4679.04	24265.6	30988.2				498	1922976	308408	1532576	2035360		38459.5	6168.16	30651.5	40707.2
	499	712096	107954	586592	774864		14241.9	2159.08	11731.8	15497.3				499	1152288	184708	912880	1156224		23045.8	3694.16	18257.6	23124.5				499	1554496	241196	1212448	1605664		31089.9	4823.92	24249	32113.3				499	1962944	296984	1591584	2052800		39258.9	5939.68	31831.7	41056
	500	732352	113148	609888	755872		14647	2262.96	12197.8	15117.4				500	1099008	176316	923776	1187744		21980.2	3526.32	18475.5	23754.9				500	1523264	239576	1272384	1619488		30465.3	4791.52	25447.7	32389.8				500	1957408	298104	1619712	2026752		39148.2	5962.08	32394.2	40535
	501	760720	114056	607328	767888		15214.4	2281.12	12146.6	15357.8				501	1136768	174344	912048	1162400		22735.4	3486.88	18241	23248				501	1543680	242564	1243232	1584736		30873.6	4851.28	24864.6	31694.7				501	1913760	300440	1614816	2014464		38275.2	6008.8	32296.3	40289.3
	502	730176	116528	602192	765312		14603.5	2330.56	12043.8	15306.2				502	1168512	174748	916832	1162592		23370.2	3494.96	18336.6	23251.8				502	1535040	241400	1274304	1583808		30700.8	4828	25486.1	31676.2				502	1942240	295712	1570176	2023808		38844.8	5914.24	31403.5	40476.2
	503	736928	109316	594448	778384		14738.6	2186.32	11889	15567.7				503	1132192	175908	930528	1193248		22643.8	3518.16	18610.6	23865				503	1542240	239524	1249024	1591616		30844.8	4790.48	24980.5	31832.3				503	1948352	306328	1578560	1966880		38967	6126.56	31571.2	39337.6
	504	735808	113350	601120	740752		14716.2	2267	12022.4	14815				504	1144352	177476	926528	1163072		22887	3549.52	18530.6	23261.4				504	1587008	244640	1228320	1583776		31740.2	4892.8	24566.4	31675.5				504	1949312	310648	1584128	1982176		38986.2	6212.96	31682.6	39643.5
	505	740384	116074	598752	766816		14807.7	2321.48	11975	15336.3				505	1157632	169388	942528	1184192		23152.6	3387.76	18850.6	23683.8				505	1548032	234000	1236192	1620448		30960.6	4680	24723.8	32409				505	1978560	301504	1550848	1966944		39571.2	6030.08	31017	39338.9
	506	744768	117788	600336	757520		14895.4	2355.76	12006.7	15150.4				506	1120960	176872	915376	1177440		22419.2	3537.44	18307.5	23548.8				506	1516096	237092	1215488	1582016		30321.9	4741.84	24309.8	31640.3				506	1971296	315880	1577536	2023840		39425.9	6317.6	31550.7	40476.8
	507	724768	111484	600752	749104		14495.4	2229.68	12015	14982.1				507	1128128	179804	895248	1160608		22562.6	3596.08	17905	23212.2				507	1518688	241296	1258688	1583936		30373.8	4825.92	25173.8	31678.7				507	1952544	308304	1575360	2000128		39050.9	6166.08	31507.2	40002.6
	508	697200	115318	590688	768368		13944	2306.36	11813.8	15367.4				508	1136640	177276	927568	1173856		22732.8	3545.52	18551.4	23477.1				508	1513760	238712	1271040	1655488		30275.2	4774.24	25420.8	33109.8				508	1984128	298912	1561504	1993216		39682.6	5978.24	31230.1	39864.3
	509	742240	112090	597824	773264		14844.8	2241.8	11956.5	15465.3				509	1122112	173536	906544	1184224		22442.2	3470.72	18130.9	23684.5				509	1558752	232736	1261152	1592576		31175	4654.72	25223	31851.5				509	1993824	304096	1556800	1957792		39876.5	6081.92	31136	39155.8
	510	748848	113602	595984	766352		14977	2272.04	11919.7	15327				510	1169568	181220	896336	1176416		23391.4	3624.4	17926.7	23528.3				510	1503488	236888	1242912	1574304		30069.8	4737.76	24858.2	31486.1				510	1875424	301960	1609216	2026816		37508.5	6039.2	32184.3	40536.3
	511	720176	111132	588640	767632		14403.5	2222.64	11772.8	15352.6				511	1131840	176060	906960	1172192		22636.8	3521.2	18139.2	23443.8				511	1529152	244744	1236480	1654432		30583	4894.88	24729.6	33088.6				511	1981376	298000	1590400	2050368		39627.5	5960	31808	41007.4
	512	718016	115922	593472	755824		14360.3	2318.44	11869.4	15116.5				512	1113056	176164	924512	1210016		22261.1	3523.28	18490.2	24200.3				512	1544832	238560	1241664	1571136		30896.6	4771.2	24833.3	31422.7				512	2013504	309784	1592384	2012192		40270.1	6195.68	31847.7	40243.8
	513	747664	114106	600080	748336		14953.3	2282.12	12001.6	14966.7				513	1160672	175404	930784	1163328		23213.4	3508.08	18615.7	23266.6				513	1546240	230556	1243232	1590528		30924.8	4611.12	24864.6	31810.6				513	1961824	312168	1522208	2016352		39236.5	6243.36	30444.2	40327
	514	742352	108508	586496	769184		14847	2170.16	11729.9	15383.7				514	1115264	179248	944240	1149728		22305.3	3584.96	18884.8	22994.6				514	1546176	240792	1227712	1597952		30923.5	4815.84	24554.2	31959				514	1970368	296168	1586528	2036704		39407.4	5923.36	31730.6	40734.1
	515	746640	118950	594448	770784		14932.8	2379	11889	15415.7				515	1121888	179852	935360	1229440		22437.8	3597.04	18707.2	24588.8				515	1552288	233192	1246336	1603008		31045.8	4663.84	24926.7	32060.2				515	2002432	308408	1560192	1964192		40048.6	6168.16	31203.8	39283.8
	516	740448	119656	601472	763296		14809	2393.12	12029.4	15265.9				516	1174688	186932	925280	1160416		23493.8	3738.64	18505.6	23208.3				516	1557728	241904	1241760	1580352		31154.6	4838.08	24835.2	31607				516	1957824	298968	1578624	2053120		39156.5	5979.36	31572.5	41062.4
	517	714208	108458	593312	765984		14284.2	2169.16	11866.2	15319.7				517	1115616	177580	933280	1169312		22312.3	3551.6	18665.6	23386.2				517	1541504	246568	1257952	1626368		30830.1	4931.36	25159	32527.4				517	1909856	306736	1542816	2034272		38197.1	6134.72	30856.3	40685.4
	518	743904	116426	604288	744464		14878.1	2328.52	12085.8	14889.3				518	1146080	172016	914912	1202944		22921.6	3440.32	18298.2	24058.9				518	1555776	222808	1216320	1566784		31115.5	4456.16	24326.4	31335.7				518	1953056	301352	1609120	2061120		39061.1	6027.04	32182.4	41222.4
	519	724720	117688	610144	792784		14494.4	2353.76	12202.9	15855.7				519	1136896	186020	886736	1158560		22737.9	3720.4	17734.7	23171.2				519	1566656	232888	1251232	1569568		31333.1	4657.76	25024.6	31391.4				519	1944160	306736	1593696	2047072		38883.2	6134.72	31873.9	40941.4
	520	736880	109618	600752	770784		14737.6	2192.36	12015	15415.7				520	1127072	175504	917856	1204896		22541.4	3510.08	18357.1	24097.9				520	1562464	221696	1254336	1627648		31249.3	4433.92	25086.7	32553				520	1904544	301960	1585632	1994528		38090.9	6039.2	31712.6	39890.6
	521	751120	116024	589728	739664		15022.4	2320.48	11794.6	14793.3				521	1136640	177428	910496	1196032		22732.8	3548.56	18209.9	23920.6				521	1575840	236280	1259840	1566464		31516.8	4725.6	25196.8	31329.3				521	1946112	312368	1586848	2067968		38922.2	6247.36	31737	41359.4
	522	732288	111636	594640	778688		14645.8	2232.72	11892.8	15573.8				522	1157792	177680	920000	1184864		23155.8	3553.6	18400	23697.3				522	1541440	236688	1253760	1593984		30828.8	4733.76	25075.2	31879.7				522	1943424	302008	1604512	2057856		38868.5	6040.16	32090.2	41157.1
	523	703904	110980	601120	755504		14078.1	2219.6	12022.4	15110.1				523	1156416	176820	949024	1170496		23128.3	3536.4	18980.5	23409.9				523	1544992	233192	1188384	1585152		30899.8	4663.84	23767.7	31703				523	2000768	301296	1530944	2021920		40015.4	6025.92	30618.9	40438.4
	524	743584	117234	605424	765312		14871.7	2344.68	12108.5	15306.2				524	1120128	184960	931824	1195072		22402.6	3699.2	18636.5	23901.4				524	1549728	233292	1233696	1590720		30994.6	4665.84	24673.9	31814.4				524	1994688	306328	1577440	2005728		39893.8	6126.56	31548.8	40114.6
	525	740656	112846	613888	769232		14813.1	2256.92	12277.8	15384.6				525	1162752	171564	912784	1172704		23255	3431.28	18255.7	23454.1				525	1523584	251940	1249504	1603008		30471.7	5038.8	24990.1	32060.2				525	1943840	296528	1554880	2035456		38876.8	5930.56	31097.6	40709.1
	526	749520	111888	594640	767744		14990.4	2237.76	11892.8	15354.9				526	1137600	168328	943408	1191872		22752	3366.56	18868.2	23837.4				526	1554464	244640	1236000	1586208		31089.3	4892.8	24720	31724.2				526	1948896	292672	1567456	1947232		38977.9	5853.44	31349.1	38944.6
	527	746736	113350	592960	737760		14934.7	2267	11859.2	14755.2				527	1106784	178840	907024	1161024		22135.7	3576.8	18140.5	23220.5				527	1522624	243576	1256224	1563744		30452.5	4871.52	25124.5	31274.9				527	1902208	308104	1595360	2041664		38044.2	6162.08	31907.2	40833.3
	528	723888	118042	604448	780752		14477.8	2360.84	12089	15615				528	1149312	174948	937904	1155680		22986.2	3498.96	18758.1	23113.6				528	1538144	242716	1234848	1641216		30762.9	4854.32	24697	32824.3				528	1911904	305360	1607488	2012576		38238.1	6107.2	32149.8	40251.5
	529	741840	115520	586848	754736		14836.8	2310.4	11737	15094.7				529	1152704	181924	956816	1213792		23054.1	3638.48	19136.3	24275.8				529	1536352	228988	1197504	1554880		30727	4579.76	23950.1	31097.6				529	1993824	291904	1560768	2050208		39876.5	5838.08	31215.4	41004.2
	530	763712	113854	594336	759280		15274.2	2277.08	11886.7	15185.6				530	1156256	176820	907120	1207712		23125.1	3536.4	18142.4	24154.2				530	1534816	232684	1245536	1593440		30696.3	4653.68	24910.7	31868.8				530	1966240	297800	1604064	1980288		39324.8	5956	32081.3	39605.8
	531	731264	115014	600080	771616		14625.3	2300.28	12001.6	15432.3				531	1163712	173180	921024	1173184		23274.2	3463.6	18420.5	23463.7				531	1523776	235216	1263616	1565344		30475.5	4704.32	25272.3	31306.9				531	1937216	299424	1557696	1996032		38744.3	5988.48	31153.9	39920.6
	532	744720	114410	594592	756384		14894.4	2288.2	11891.8	15127.7				532	1134400	180560	919840	1178304		22688	3611.2	18396.8	23566.1				532	1547168	231064	1250272	1584608		30943.4	4621.28	25005.4	31692.2				532	1991392	299520	1536256	1960352		39827.8	5990.4	30725.1	39207
	533	723584	115216	599216	768208		14471.7	2304.32	11984.3	15364.2				533	1131520	179096	910288	1147360		22630.4	3581.92	18205.8	22947.2				533	1551360	230000	1229376	1601248		31027.2	4600	24587.5	32025				533	1934272	305312	1589568	2007232		38685.4	6106.24	31791.4	40144.6
	534	713840	111888	589776	785760		14276.8	2237.76	11795.5	15715.2				534	1148320	180056	936608	1184224		22966.4	3601.12	18732.2	23684.5				534	1535200	229748	1240032	1610720		30704	4594.96	24800.6	32214.4				534	1933984	291960	1595136	2061920		38679.7	5839.2	31902.7	41238.4
	535	728320	113098	585968	737968		14566.4	2261.96	11719.4	14759.4				535	1138336	178436	937648	1182464		22766.7	3568.72	18753	23649.3				535	1533760	238460	1250080	1642176		30675.2	4769.2	25001.6	32843.5				535	1987712	307448	1578944	1997760		39754.2	6148.96	31578.9	39955.2
	536	726048	122480	610768	756896		14521	2449.6	12215.4	15137.9				536	1136448	182076	885184	1152704		22729	3641.52	17703.7	23054.1				536	1544416	235724	1242240	1623232		30888.3	4714.48	24844.8	32464.6				536	1993280	301048	1604448	2041056		39865.6	6020.96	32089	40821.1
	537	732080	111332	604192	765824		14641.6	2226.64	12083.8	15316.5				537	1128736	178436	922224	1203104		22574.7	3568.72	18444.5	24062.1				537	1520704	243728	1231264	1612000		30414.1	4874.56	24625.3	32240				537	1926400	295056	1568000	2016640		38528	5901.12	31360	40332.8
	538	762320	113904	583056	764288		15246.4	2278.08	11661.1	15285.8				538	1127488	181420	927424	1193312		22549.8	3628.4	18548.5	23866.2				538	1569728	234052	1258592	1593696		31394.6	4681.04	25171.8	31873.9				538	2010592	315776	1575040	1987680		40211.8	6315.52	31500.8	39753.6
	539	731728	116780	615536	758960		14634.6	2335.6	12310.7	15179.2				539	1126080	168480	914848	1169568		22521.6	3369.6	18297	23391.4				539	1549248	230204	1209280	1608320		30985	4604.08	24185.6	32166.4				539	1917280	309728	1571296	2063392		38345.6	6194.56	31425.9	41267.8
	540	723264	112594	596592	779520		14465.3	2251.88	11931.8	15590.4				540	1133152	178692	906752	1159456		22663	3573.84	18135	23189.1				540	1537632	235472	1253888	1624352		30752.6	4709.44	25077.8	32487				540	1925600	308712	1571648	1967744		38512	6174.24	31433	39354.9
	541	752880	113502	589200	746112		15057.6	2270.04	11784	14922.2				541	1135328	175100	902400	1148736		22706.6	3502	18048	22974.7				541	1563008	229848	1264512	1621632		31260.2	4596.96	25290.2	32432.6				541	1946464	301352	1616256	2003744		38929.3	6027.04	32325.1	40074.9
	542	744928	116174	601472	746016		14898.6	2323.48	12029.4	14920.3				542	1125920	179400	897424	1169920		22518.4	3588	17948.5	23398.4				542	1542400	232480	1242464	1605344		30848	4649.6	24849.3	32106.9				542	1901024	311200	1587872	2011616		38020.5	6224	31757.4	40232.3
	543	736784	114510	570288	772848		14735.7	2290.2	11405.8	15457				543	1145920	182332	924608	1181760		22918.4	3646.64	18492.2	23635.2				543	1490784	237496	1246496	1585568		29815.7	4749.92	24929.9	31711.4				543	1971712	295104	1585408	2028704		39434.2	5902.08	31708.2	40574.1
	544	754624	113502	599360	732144		15092.5	2270.04	11987.2	14642.9				544	1140000	169896	911120	1197504		22800	3397.92	18222.4	23950.1				544	1548672	238560	1260416	1606304		30973.4	4771.2	25208.3	32126.1				544	1978336	293480	1565056	1995712		39566.7	5869.6	31301.1	39914.2
	545	739872	119504	601568	769184		14797.4	2390.08	12031.4	15383.7				545	1157152	179652	921552	1171232		23143	3593.04	18431	23424.6				545	1547488	239220	1259200	1573472		30949.8	4784.4	25184	31469.4				545	1893344	298352	1625440	2035072		37866.9	5967.04	32508.8	40701.4
	546	739520	110022	596240	778848		14790.4	2200.44	11924.8	15577				546	1118080	173484	916768	1170368		22361.6	3469.68	18335.4	23407.4				546	1503264	241956	1263264	1614560		30065.3	4839.12	25265.3	32291.2				546	1938400	300744	1521344	1956544		38768	6014.88	30426.9	39130.9
	547	748432	116174	590944	745904		14968.6	2323.48	11818.9	14918.1				547	1106112	171008	922896	1178368		22122.2	3420.16	18457.9	23567.4				547	1494208	234204	1241344	1578880		29884.2	4684.08	24826.9	31577.6				547	1959648	300288	1579360	2019648		39193	6005.76	31587.2	40393
	548	730688	115620	588592	769392		14613.8	2312.4	11771.8	15387.8				548	1131904	172272	950368	1172352		22638.1	3445.44	19007.4	23447				548	1535520	231520	1226176	1561248		30710.4	4630.4	24523.5	31225				548	1916096	290744	1583648	2071104		38321.9	5814.88	31673	41422.1
	549	752464	113854	585616	772912		15049.3	2277.08	11712.3	15458.2				549	1146784	182836	921808	1185280		22935.7	3656.72	18436.2	23705.6				549	1537408	247784	1236992	1578080		30748.2	4955.68	24739.8	31561.6				549	1969088	289016	1547552	1988224		39381.8	5780.32	30951	39764.5
	550	751632	115720	580736	756800		15032.6	2314.4	11614.7	15136				550	1135456	168884	897520	1184512		22709.1	3377.68	17950.4	23690.2				550	1547616	235624	1253216	1605024		30952.3	4712.48	25064.3	32100.5				550	1964416	313232	1612320	1987072		39288.3	6264.64	32246.4	39741.4
	551	719040	113148	616672	787152		14380.8	2262.96	12333.4	15743				551	1143872	186224	896176	1183936		22877.4	3724.48	17923.5	23678.7				551	1534816	243376	1246976	1590560		30696.3	4867.52	24939.5	31811.2				551	1851936	296784	1577696	2040800		37038.7	5935.68	31553.9	40816
	552	733168	114208	581312	777712		14663.4	2284.16	11626.2	15554.2				552	1115520	179956	935520	1157792		22310.4	3599.12	18710.4	23155.8				552	1548128	237396	1239424	1604064		30962.6	4747.92	24788.5	32081.3				552	1966080	313696	1556000	1999264		39321.6	6273.92	31120	39985.3
	553	749472	118294	601888	762784		14989.4	2365.88	12037.8	15255.7				553	1082048	174796	928656	1178688		21641	3495.92	18573.1	23573.8				553	1521184	232936	1244864	1636160		30423.7	4658.72	24897.3	32723.2				553	1958272	312424	1595712	2041504		39165.4	6248.48	31914.2	40830.1
	554	722912	112342	603008	795840		14458.2	2246.84	12060.2	15916.8				554	1149504	174496	925232	1168480		22990.1	3489.92	18504.6	23369.6				554	1548288	241500	1247808	1555552		30965.8	4830	24956.2	31111				554	1916512	299728	1570368	2030560		38330.2	5994.56	31407.4	40611.2
	555	724400	110374	586432	760720		14488	2207.48	11728.6	15214.4				555	1117888	180712	930112	1181664		22357.8	3614.24	18602.2	23633.3				555	1546528	230860	1238240	1577696		30930.6	4617.2	24764.8	31553.9				555	1940704	307600	1581760	2000064		38814.1	6152	31635.2	40001.3
	556	725584	117890	612976	758448		14511.7	2357.8	12259.5	15169				556	1155488	177628	921024	1178688		23109.8	3552.56	18420.5	23573.8				556	1506560	239016	1256160	1583872		30131.2	4780.32	25123.2	31677.4				556	1939904	311760	1633184	2022304		38798.1	6235.2	32663.7	40446.1
	557	722800	116124	613328	782144		14456	2322.48	12266.6	15642.9				557	1165536	172876	941648	1173376		23310.7	3457.52	18833	23467.5				557	1524064	236888	1258720	1604864		30481.3	4737.76	25174.4	32097.3				557	1925280	301200	1570592	2037984		38505.6	6024	31411.8	40759.7
	558	748960	112644	601312	756688		14979.2	2252.88	12026.2	15133.8				558	1117184	175052	935680	1142720		22343.7	3501.04	18713.6	22854.4				558	1509632	236888	1241472	1599872		30192.6	4737.76	24829.4	31997.4				558	2004768	306176	1567616	1949280		40095.4	6123.52	31352.3	38985.6
	559	736624	114106	602496	759280		14732.5	2282.12	12049.9	15185.6				559	1129024	172524	940400	1155424		22580.5	3450.48	18808	23108.5				559	1523104	235268	1248640	1596672		30462.1	4705.36	24972.8	31933.4				559	1965408	305568	1590048	2051328		39308.2	6111.36	31801	41026.6
	560	742864	118748	602352	773520		14857.3	2374.96	12047	15470.4				560	1119168	185616	953488	1192672		22383.4	3712.32	19069.8	23853.4				560	1534656	237092	1245984	1604288		30693.1	4741.84	24919.7	32085.8				560	1947232	288256	1535840	2047936		38944.6	5765.12	30716.8	40958.7
	561	725952	112796	588032	768000		14519	2255.92	11760.6	15360				561	1144384	169592	912928	1180160		22887.7	3391.84	18258.6	23603.2				561	1541120	239624	1246272	1577600		30822.4	4792.48	24925.4	31552				561	1968384	302264	1577984	2004480		39367.7	6045.28	31559.7	40089.6
	562	726416	116730	600656	754896		14528.3	2334.6	12013.1	15097.9				562	1134240	178588	936912	1179584		22684.8	3571.76	18738.2	23591.7				562	1497920	232532	1254112	1597792		29958.4	4650.64	25082.2	31955.8				562	1938624	312120	1587584	2024864		38772.5	6242.4	31751.7	40497.3
	563	705856	119958	597312	768976		14117.1	2399.16	11946.2	15379.5				563	1135744	177680	917552	1176480		22714.9	3553.6	18351	23529.6				563	1490080	241552	1244672	1583552		29801.6	4831.04	24893.4	31671				563	2000544	292568	1519904	2005664		40010.9	5851.36	30398.1	40113.3
	564	744464	109366	587456	744112		14889.3	2187.32	11749.1	14882.2				564	1122752	182228	913504	1181248		22455	3644.56	18270.1	23625				564	1533504	243324	1224096	1595136		30670.1	4866.48	24481.9	31902.7				564	1959072	310496	1589600	1995232		39181.4	6209.92	31792	39904.6
	565	736784	119150	619600	767376		14735.7	2383	12392	15347.5				565	1161568	178136	930736	1172928		23231.4	3562.72	18614.7	23458.6				565	1509408	239220	1227008	1561408		30188.2	4784.4	24540.2	31228.2				565	1932640	305112	1623168	2081216		38652.8	6102.24	32463.4	41624.3
	566	737712	110576	595216	792432		14754.2	2211.52	11904.3	15848.6				566	1153280	169996	905568	1193408		23065.6	3399.92	18111.4	23868.2				566	1592224	244692	1243296	1560544		31844.5	4893.84	24865.9	31210.9				566	1964896	298712	1541248	2027520		39297.9	5974.24	30825	40550.4
	567	734768	116628	584592	757216		14695.4	2332.56	11691.8	15144.3				567	1120960	179500	939888	1155392		22419.2	3590	18797.8	23107.8				567	1569856	241704	1256640	1589920		31397.1	4834.08	25132.8	31798.4				567	2004320	309120	1530368	1975264		40086.4	6182.4	30607.4	39505.3
	568	739408	116780	610352	770896		14788.2	2335.6	12207	15417.9				568	1134496	184456	936768	1159552		22689.9	3689.12	18735.4	23191				568	1574848	231872	1250176	1633696		31497	4637.44	25003.5	32673.9				568	1855680	297952	1583296	2020576		37113.6	5959.04	31665.9	40411.5
	569	730800	113048	607072	762832		14616	2260.96	12141.4	15256.6				569	1159200	168732	919216	1174656		23184	3374.64	18384.3	23493.1				569	1549632	239220	1232832	1571872		30992.6	4784.4	24656.6	31437.4				569	1934976	297544	1519136	2028288		38699.5	5950.88	30382.7	40565.8
	570	751168	117788	596384	769088		15023.4	2355.76	11927.7	15381.8				570	1161984	178692	940656	1195648		23239.7	3573.84	18813.1	23913				570	1519648	247480	1249504	1605280		30393	4949.6	24990.1	32105.6				570	1956224	304448	1577664	2023584		39124.5	6088.96	31553.3	40471.7
	571	740656	114812	588848	764640		14813.1	2296.24	11777	15292.8				571	1093152	175908	910384	1188992		21863	3518.16	18207.7	23779.8				571	1524544	233088	1232320	1599808		30490.9	4661.76	24646.4	31996.2				571	1920608	302464	1571648	2040576		38412.2	6049.28	31433	40811.5
	572	738320	111838	591472	767488		14766.4	2236.76	11829.4	15349.8				572	1123744	174140	899440	1177152		22474.9	3482.8	17988.8	23543				572	1569312	248392	1266784	1563168		31386.2	4967.84	25335.7	31263.4				572	1991168	305312	1593440	1973120		39823.4	6106.24	31868.8	39462.4
	573	745904	112392	605376	743328		14918.1	2247.84	12107.5	14866.6				573	1151200	184100	922384	1170240		23024	3682	18447.7	23404.8				573	1489856	240688	1258624	1594144		29797.1	4813.76	25172.5	31882.9				573	1953408	313032	1589280	1996064		39068.2	6260.64	31785.6	39921.3
	574	734464	117134	582544	776976		14689.3	2342.68	11650.9	15539.5				574	1159872	178032	945184	1214496		23197.4	3560.64	18903.7	24289.9				574	1565184	241500	1241920	1572384		31303.7	4830	24838.4	31447.7				574	1915872	300032	1573984	2039840		38317.4	6000.64	31479.7	40796.8
	575	763616	111534	592240	737088		15272.3	2230.68	11844.8	14741.8				575	1150624	178488	909968	1195776		23012.5	3569.76	18199.4	23915.5				575	1526016	243932	1271712	1557696		30520.3	4878.64	25434.2	31153.9				575	1947168	296168	1576320	1956256		38943.4	5923.36	31526.4	39125.1
	576	753024	116780	581824	758816		15060.5	2335.6	11636.5	15176.3				576	1143328	180208	922944	1167584		22866.6	3604.16	18458.9	23351.7				576	1498176	229544	1298272	1623392		29963.5	4590.88	25965.4	32467.8				576	1933664	312880	1605248	2065216		38673.3	6257.6	32105	41304.3
	577	722960	115166	604352	769344		14459.2	2303.32	12087	15386.9				577	1115840	176972	928656	1158368		22316.8	3539.44	18573.1	23167.4				577	1546752	236992	1233472	1549408		30935	4739.84	24669.4	30988.2				577	1936960	298256	1619392	2092736		38739.2	5965.12	32387.8	41854.7
	578	751120	115014	592592	740080		15022.4	2300.28	11851.8	14801.6				578	1131936	173584	926384	1171200		22638.7	3471.68	18527.7	23424				578	1549472	238104	1241664	1574528		30989.4	4762.08	24833.3	31490.6				578	1955776	303736	1542944	1989920		39115.5	6074.72	30858.9	39798.4
	579	751376	116124	591472	729712		15027.5	2322.48	11829.4	14594.2				579	1153088	177172	929392	1179872		23061.8	3543.44	18587.8	23597.4				579	1511968	231064	1218464	1676960		30239.4	4621.28	24369.3	33539.2				579	1926880	301144	1596960	1989184		38537.6	6022.88	31939.2	39783.7
	580	725232	114258	601472	773568		14504.6	2285.16	12029.4	15471.4				580	1116608	183748	942736	1209824		22332.2	3674.96	18854.7	24196.5				580	1550464	244440	1213856	1536000		31009.3	4888.8	24277.1	30720				580	1962720	297440	1597056	2109248		39254.4	5948.8	31941.1	42185
	581	746176	112694	589472	748432		14923.5	2253.88	11789.4	14968.6				581	1148928	177376	924864	1155232		22978.6	3547.52	18497.3	23104.6				581	1553824	244336	1235616	1589728		31076.5	4886.72	24712.3	31794.6				581	2026400	293480	1587072	1977472		40528	5869.6	31741.4	39549.4
	582	756544	115972	586592	775904		15130.9	2319.44	11731.8	15518.1				582	1127968	175808	927888	1179360		22559.4	3516.16	18557.8	23587.2				582	1486368	242108	1254912	1624032		29727.4	4842.16	25098.2	32480.6				582	1937344	314304	1598816	2032768		38746.9	6286.08	31976.3	40655.4
	583	730640	112240	589360	767632		14612.8	2244.8	11787.2	15352.6				583	1117312	174544	921552	1186816		22346.2	3490.88	18431	23736.3				583	1545696	236992	1232000	1556960		30913.9	4739.84	24640	31139.2				583	1970976	298152	1560384	2016128		39419.5	5963.04	31207.7	40322.6
	584	734976	114712	583968	754272		14699.5	2294.24	11679.4	15085.4				584	1155392	185616	901056	1188256		23107.8	3712.32	18021.1	23765.1				584	1512384	241552	1274176	1585792		30247.7	4831.04	25483.5	31715.8				584	1951008	304192	1578720	1965088		39020.2	6083.84	31574.4	39301.8
	585	758240	120664	597984	781328		15164.8	2413.28	11959.7	15626.6				585	1141632	178992	907792	1176576		22832.6	3579.84	18155.8	23531.5				585	1489024	231872	1266944	1627008		29780.5	4637.44	25338.9	32540.2				585	1941952	299368	1597920	2080992		38839	5987.36	31958.4	41619.8
	586	734000	110274	612048	768000		14680	2205.48	12241	15360				586	1133664	169340	928608	1187104		22673.3	3386.8	18572.2	23742.1				586	1549024	235216	1224704	1556352		30980.5	4704.32	24494.1	31127				586	1918016	294344	1550464	2041184		38360.3	5886.88	31009.3	40823.7
	587	739520	111938	597264	739728		14790.4	2238.76	11945.3	14794.6				587	1147584	182988	923424	1139168		22951.7	3659.76	18468.5	22783.4				587	1506944	237700	1248864	1607104		30138.9	4754	24977.3	32142.1				587	1900672	309424	1601472	1979328		38013.4	6188.48	32029.4	39586.6
	588	733632	115216	589360	755968		14672.6	2304.32	11787.2	15119.4				588	1141056	175556	935776	1176800		22821.1	3511.12	18715.5	23536				588	1508480	244136	1242560	1596480		30169.6	4882.72	24851.2	31929.6				588	1913120	297336	1560352	2005152		38262.4	5946.72	31207	40103
	589	716880	114208	582800	779264		14337.6	2284.16	11656	15585.3				589	1133824	179400	932656	1191360		22676.5	3588	18653.1	23827.2				589	1568832	244540	1227872	1564800		31376.6	4890.8	24557.4	31296				589	1925600	297592	1576608	2037888		38512	5951.84	31532.2	40757.8
	590	758960	115670	569712	747040		15179.2	2313.4	11394.2	14940.8				590	1146752	177072	931152	1191200		22935	3541.44	18623	23824				590	1522944	232532	1284608	1652224		30458.9	4650.64	25692.2	33044.5				590	1955264	306832	1582336	2031040		39105.3	6136.64	31646.7	40620.8
	591	755408	115872	592704	769392		15108.2	2317.44	11854.1	15387.8				591	1154080	183192	942848	1191520		23081.6	3663.84	18857	23830.4				591	1542816	237144	1266368	1596352		30856.3	4742.88	25327.4	31927				591	1950688	310544	1601216	2018016		39013.8	6210.88	32024.3	40360.3
	592	712816	111484	591216	786224		14256.3	2229.68	11824.3	15724.5				592	1125312	173280	931936	1185504		22506.2	3465.6	18638.7	23710.1				592	1564960	240384	1236192	1554816		31299.2	4807.68	24723.8	31096.3				592	1957984	295208	1594336	2002432		39159.7	5904.16	31886.7	40048.6
	593	745808	116074	595520	754896		14916.2	2321.48	11910.4	15097.9				593	1172032	181016	933696	1159616		23440.6	3620.32	18673.9	23192.3				593	1520704	236940	1287648	1619072		30414.1	4738.8	25753	32381.4				593	1961344	296832	1590688	1987680		39226.9	5936.64	31813.8	39753.6
	594	736528	116478	613024	778480		14730.6	2329.56	12260.5	15569.6				594	1118560	172776	910288	1199424		22371.2	3455.52	18205.8	23988.5				594	1574720	235368	1260672	1600992		31494.4	4707.36	25213.4	32019.8				594	1932448	287184	1564704	2032160		38649	5743.68	31294.1	40643.2
	595	727968	111282	594192	779984		14559.4	2225.64	11883.8	15599.7				595	1142208	176164	920256	1176576		22844.2	3523.28	18405.1	23531.5				595	1528768	245352	1254624	1589408		30575.4	4907.04	25092.5	31788.2				595	1921152	304096	1527296	1963872		38423	6081.92	30545.9	39277.4
	596	758400	117436	585776	743696		15168	2348.72	11715.5	14873.9				596	1149312	180104	912624	1193888		22986.2	3602.08	18252.5	23877.8				596	1525152	240944	1243488	1610560		30503	4818.88	24869.8	32211.2				596	1975072	308000	1579584	2001952		39501.4	6160	31591.7	40039
	597	734144	116478	600448	763712		14682.9	2329.56	12009	15274.2				597	1145856	172524	919264	1198976		22917.1	3450.48	18385.3	23979.5				597	1532224	226860	1216160	1601472		30644.5	4537.2	24323.2	32029.4				597	1942016	302216	1566816	2066720		38840.3	6044.32	31336.3	41334.4
	598	704720	119504	608864	765152		14094.4	2390.08	12177.3	15303				598	1146112	172980	920928	1148160		22922.2	3459.6	18418.6	22963.2				598	1572672	234104	1254048	1601984		31453.4	4682.08	25081	32039.7				598	1928992	288200	1561152	1980288		38579.8	5764	31223	39605.8
	599	732656	116730	591664	742048		14653.1	2334.6	11833.3	14841				599	1103936	178692	920096	1165312		22078.7	3573.84	18401.9	23306.2				599	1515776	238056	1244864	1620672		30315.5	4761.12	24897.3	32413.4				599	1996256	299976	1521504	2030592		39925.1	5999.52	30430.1	40611.8
	600	727392	118192	605424	759120		14547.8	2363.84	12108.5	15182.4				600	1154592	176112	942528	1166016		23091.8	3522.24	18850.6	23320.3				600	1533024	242008	1219936	1590240		30660.5	4840.16	24398.7	31804.8				600	1929376	309480	1559968	2008576		38587.5	6189.6	31199.4	40171.5
	601	733328	111686	593728	783184		14666.6	2233.72	11874.6	15663.7				601	1182144	174648	903696	1205152		23642.9	3492.96	18073.9	24103				601	1537152	247376	1224608	1633280		30743	4947.52	24492.2	32665.6				601	2003296	298152	1576704	1951648		40065.9	5963.04	31534.1	39033
	602	763920	114560	596752	761344		15278.4	2291.2	11935	15226.9				602	1116608	179400	914224	1181824		22332.2	3588	18284.5	23636.5				602	1533856	232024	1240288	1613280		30677.1	4640.48	24805.8	32265.6				602	1911616	306984	1589120	2003264		38232.3	6139.68	31782.4	40065.3
	603	724192	116074	612720	759536		14483.8	2321.48	12254.4	15190.7				603	1121120	171360	931472	1203584		22422.4	3427.2	18629.4	24071.7				603	1549632	242108	1218272	1563200		30992.6	4842.16	24365.4	31264				603	1917760	302928	1584448	2007040		38355.2	6058.56	31689	40140.8
	604	766352	109164	577520	746640		15327	2183.28	11550.4	14932.8				604	1163808	176768	897984	1190784		23276.2	3535.36	17959.7	23815.7				604	1533696	241400	1292704	1596640		30673.9	4828	25854.1	31932.8				604	1966240	312272	1582688	1992256		39324.8	6245.44	31653.8	39845.1
	605	722608	115772	599056	763968		14452.2	2315.44	11981.1	15279.4				605	1157888	175052	948912	1172352		23157.8	3501.04	18978.2	23447				605	1545152	231672	1245024	1598656		30903	4633.44	24900.5	31973.1				605	1986528	307136	1603584	1998176		39730.6	6142.72	32071.7	39963.5
	606	734144	120564	604288	773424		14682.9	2411.28	12085.8	15468.5				606	1124896	182228	923104	1206208		22497.9	3644.56	18462.1	24124.2				606	1545280	241196	1217056	1566176		30905.6	4823.92	24341.1	31323.5				606	1905728	296120	1543904	2028832		38114.6	5922.4	30878.1	40576.6
	607	724608	112896	600544	776112		14492.2	2257.92	12010.9	15522.2				607	1137024	171460	913200	1163488		22740.5	3429.2	18264	23269.8				607	1562624	247328	1271648	1590624		31252.5	4946.56	25433	31812.5				607	1979008	296680	1559744	1997600		39580.2	5933.6	31194.9	39952
	608	737136	116226	611888	747200		14742.7	2324.52	12237.8	14944				608	1123008	171360	951056	1196608		22460.2	3427.2	19021.1	23932.2				608	1520352	226860	1238208	1598816		30407	4537.2	24764.2	31976.3				608	1947232	308304	1598528	2035456		38944.6	6166.08	31970.6	40709.1
	609	713936	119050	598400	756016		14278.7	2381	11968	15120.3				609	1129216	180056	935680	1179008		22584.3	3601.12	18713.6	23580.2				609	1578240	239272	1244128	1528704		31564.8	4785.44	24882.6	30574.1				609	1941088	299016	1562048	2022304		38821.8	5980.32	31241	40446.1
	610	729712	113552	578336	770272		14594.2	2271.04	11566.7	15405.4				610	1145216	179248	900320	1188128		22904.3	3584.96	18006.4	23762.6				610	1551200	242664	1273408	1596576		31024	4853.28	25468.2	31931.5				610	1959936	304752	1547936	2010848		39198.7	6095.04	30958.7	40217
	611	736624	112038	616416	762896		14732.5	2240.76	12328.3	15257.9				611	1151552	178436	950528	1148640		23031	3568.72	19010.6	22972.8				611	1551648	231316	1242976	1613536		31033	4626.32	24859.5	32270.7				611	1925056	306328	1590560	1999648		38501.1	6126.56	31811.2	39993
	612	731520	117486	597520	764176		14630.4	2349.72	11950.4	15283.5				612	1127584	174092	917504	1200384		22551.7	3481.84	18350.1	24007.7				612	1550304	240080	1241728	1561568		31006.1	4801.6	24834.6	31231.4				612	1962880	302368	1574944	1961664		39257.6	6047.36	31498.9	39233.3
	613	759888	106946	607792	751536		15197.8	2138.92	12155.8	15030.7				613	1108512	176920	917760	1137760		22170.2	3538.4	18355.2	22755.2				613	1531104	238104	1290272	1600992		30622.1	4762.08	25805.4	32019.8				613	1966080	304144	1565504	2015968		39321.6	6082.88	31310.1	40319.4
	614	749472	114006	613024	775440		14989.4	2280.12	12260.5	15508.8				614	1146432	176164	932352	1158880		22928.6	3523.28	18647	23177.6				614	1512032	239524	1238560	1573152		30240.6	4790.48	24771.2	31463				614	1954112	303232	1605024	1979008		39082.2	6064.64	32100.5	39580.2
	615	708640	115520	604608	772912		14172.8	2310.4	12092.2	15458.2				615	1114912	174140	901104	1189472		22298.2	3482.8	18022.1	23789.4				615	1527008	244336	1239616	1575200		30540.2	4886.72	24792.3	31504				615	1925664	299824	1550208	1950336		38513.3	5996.48	31004.2	39006.7
	616	732912	112946	615584	782928		14658.2	2258.92	12311.7	15658.6				616	1167264	179804	911424	1162400		23345.3	3596.08	18228.5	23248				616	1529952	239576	1246016	1608896		30599	4791.52	24920.3	32177.9				616	1951808	302824	1604192	2037664		39036.2	6056.48	32083.8	40753.3
	617	735072	118798	605728	763456		14701.4	2375.96	12114.6	15269.1				617	1118080	181824	928512	1208384		22361.6	3636.48	18570.2	24167.7				617	1513728	231572	1225440	1617248		30274.6	4631.44	24508.8	32345				617	1940512	309680	1617632	2023904		38810.2	6193.6	32352.6	40478.1
	618	737088	110224	602352	761392		14741.8	2204.48	12047	15227.8				618	1119552	172624	919472	1173376		22391	3452.48	18389.4	23467.5				618	1552896	245704	1244608	1563648		31057.9	4914.08	24892.2	31273				618	1956768	302464	1585056	2013376		39135.4	6049.28	31701.1	40267.5
	619	730224	112090	589104	777968		14604.5	2241.8	11782.1	15559.4				619	1150144	175860	920096	1168672		23002.9	3517.2	18401.9	23373.4				619	1524576	236080	1259456	1649728		30491.5	4721.6	25189.1	32994.6				619	1958304	302624	1577088	1995008		39166.1	6052.48	31541.8	39900.2
	620	741776	118142	618160	778224		14835.5	2362.84	12363.2	15564.5				620	1133472	180964	930784	1165312		22669.4	3619.28	18615.7	23306.2				620	1529312	240436	1215072	1626560		30586.2	4808.72	24301.4	32531.2				620	1932480	300488	1565024	2026592		38649.6	6009.76	31300.5	40531.8
	621	731728	113250	601776	777248		14634.6	2265	12035.5	15545				621	1146752	171160	898816	1155008		22935	3423.2	17976.3	23100.2				621	1536256	244184	1251424	1565536		30725.1	4883.68	25028.5	31310.7				621	1965600	302416	1566784	2001696		39312	6048.32	31335.7	40033.9
	622	738992	117032	606240	767632		14779.8	2340.64	12124.8	15352.6				622	1167360	179904	914960	1134144		23347.2	3598.08	18299.2	22682.9				622	1505120	238308	1240096	1631424		30102.4	4766.16	24801.9	32628.5				622	1955136	301456	1548512	1994304		39102.7	6029.12	30970.2	39886.1
	623	730896	112896	600704	764640		14617.9	2257.92	12014.1	15292.8				623	1131904	176060	925392	1188704		22638.1	3521.2	18507.8	23774.1				623	1572512	229948	1246336	1546656		31450.2	4598.96	24926.7	30933.1				623	1938720	303024	1576448	2051616		38774.4	6060.48	31529	41032.3
	624	727648	112694	609072	777600		14553	2253.88	12181.4	15552				624	1135136	172776	943680	1192576		22702.7	3455.52	18873.6	23851.5				624	1554656	244336	1232960	1544480		31093.1	4886.72	24659.2	30889.6				624	1953792	302312	1590208	2030048		39075.8	6046.24	31804.2	40601
	625	750816	108408	592240	757728		15016.3	2168.16	11844.8	15154.6				625	1141920	178388	909920	1167104		22838.4	3567.76	18198.4	23342.1				625	1495712	237600	1236000	1641376		29914.2	4752	24720	32827.5				625	1907168	307544	1583232	1990784		38143.4	6150.88	31664.6	39815.7
	626	720128	114208	597424	775328		14402.6	2284.16	11948.5	15506.6				626	1108256	176112	954896	1222368		22165.1	3522.24	19097.9	24447.4				626	1540768	238208	1252288	1585408		30815.4	4764.16	25045.8	31708.2				626	1973824	295664	1551680	1953408		39476.5	5913.28	31033.6	39068.2
	627	732544	114460	590176	784272		14650.9	2289.2	11803.5	15685.4				627	1144224	173940	910384	1194496		22884.5	3478.8	18207.7	23889.9				627	1548512	245148	1241728	1563328		30970.2	4902.96	24834.6	31266.6				627	1909632	291960	1577856	1999360		38192.6	5839.2	31557.1	39987.2
	628	748224	115822	607888	737040		14964.5	2316.44	12157.8	14740.8				628	1179104	178388	922896	1170496		23582.1	3567.76	18457.9	23409.9				628	1477280	227112	1276960	1609920		29545.6	4542.24	25539.2	32198.4				628	1925120	316488	1574528	1991456		38502.4	6329.76	31490.6	39829.1
	629	744880	115570	609072	754320		14897.6	2311.4	12181.4	15086.4				629	1129792	183192	951200	1203904		22595.8	3663.84	19024	24078.1				629	1521120	241904	1218464	1567680		30422.4	4838.08	24369.3	31353.6				629	1952128	290080	1584992	2071200		39042.6	5801.6	31699.8	41424
	630	740240	109466	591008	780032		14804.8	2189.32	11820.2	15600.6				630	1147904	169844	915840	1183136		22958.1	3396.88	18316.8	23662.7				630	1542656	243272	1281120	1571968		30853.1	4865.44	25622.4	31439.4				630	1980448	301704	1563008	2008960		39609	6034.08	31260.2	40179.2
	631	733680	114612	583664	767536		14673.6	2292.24	11673.3	15350.7				631	1148352	184100	933280	1188736		22967	3682	18665.6	23774.7				631	1492736	234812	1223520	1608320		29854.7	4696.24	24470.4	32166.4				631	1936192	308104	1544320	2016640		38723.8	6162.08	30886.4	40332.8
	632	726048	116376	590336	760416		14521	2327.52	11806.7	15208.3				632	1092544	181624	924352	1197664		21850.9	3632.48	18487	23953.3				632	1513600	241296	1224768	1576000		30272	4825.92	24495.4	31520				632	1921152	305616	1598112	2050208		38423	6112.32	31962.2	41004.2
	633	736576	115066	593008	775120		14731.5	2301.32	11860.2	15502.4				633	1140928	171260	902032	1183040		22818.6	3425.2	18040.6	23660.8				633	1550368	245808	1264576	1617536		31007.4	4916.16	25291.5	32350.7				633	1975488	307296	1612256	2045184		39509.8	6145.92	32245.1	40903.7
	634	749264	113854	605728	763616		14985.3	2277.08	12114.6	15272.3				634	1134464	181420	927936	1186272		22689.3	3628.4	18558.7	23725.4				634	1489440	247376	1248864	1621664		29788.8	4947.52	24977.3	32433.3				634	1949312	301048	1601888	2026720		38986.2	6020.96	32037.8	40534.4
	635	759952	119706	595216	768880		15199	2394.12	11904.3	15377.6				635	1135136	176516	914640	1209184		22702.7	3530.32	18292.8	24183.7				635	1557536	243424	1211552	1571968		31150.7	4868.48	24231	31439.4				635	1935808	303584	1521760	1978144		38716.2	6071.68	30435.2	39562.9
	636	730544	118192	584640	767328		14610.9	2363.84	11692.8	15346.6				636	1151136	178284	900224	1164736		23022.7	3565.68	18004.5	23294.7				636	1487328	249052	1268288	1605888		29746.6	4981.04	25365.8	32117.8				636	1930752	305616	1595040	2000544		38615	6112.32	31900.8	40010.9
	637	729360	116276	579408	777552		14587.2	2325.52	11588.2	15551				637	1167776	177124	930896	1202016		23355.5	3542.48	18617.9	24040.3				637	1513984	227520	1228448	1616832		30279.7	4550.4	24569	32336.6				637	1958848	310496	1600256	2027520		39177	6209.92	32005.1	40550.4
	638	752256	114560	602352	764640		15045.1	2291.2	12047	15292.8				638	1111648	173788	927056	1190848		22233	3475.76	18541.1	23817				638	1561888	238056	1215968	1569888		31237.8	4761.12	24319.4	31397.8				638	1998624	294848	1547936	2011168		39972.5	5896.96	30958.7	40223.4
	639	754896	119908	600704	734608		15097.9	2398.16	12014.1	14692.2				639	1165600	180512	910240	1146016		23312	3610.24	18204.8	22920.3				639	1526688	236332	1246336	1605440		30533.8	4726.64	24926.7	32108.8				639	1955040	311760	1572544	1947296		39100.8	6235.2	31450.9	38945.9
	640	725856	115972	584128	758752		14517.1	2319.44	11682.6	15175				640	1122592	183192	955312	1160704		22451.8	3663.84	19106.2	23214.1				640	1529728	234456	1220672	1553216		30594.6	4689.12	24413.4	31064.3				640	1958528	303384	1553920	1996256		39170.6	6067.68	31078.4	39925.1
	641	754528	119100	602960	785664		15090.6	2382	12059.2	15713.3				641	1158784	180156	925024	1182304		23175.7	3603.12	18500.5	23646.1				641	1573344	237648	1216896	1578560		31466.9	4752.96	24337.9	31571.2				641	1976896	305664	1595712	2019872		39537.9	6113.28	31914.2	40397.4
	642	744928	112846	587824	760352		14898.6	2256.92	11756.5	15207				642	1124320	175152	922432	1216000		22486.4	3503.04	18448.6	24320				642	1540960	241600	1260576	1624448		30819.2	4832	25211.5	32489				642	1951424	296984	1589568	1990592		39028.5	5939.68	31791.4	39811.8
	643	714352	116932	595520	744768		14287	2338.64	11910.4	14895.4				643	1132192	177276	929856	1218624		22643.8	3545.52	18597.1	24372.5				643	1559232	238208	1242560	1575968		31184.6	4764.16	24851.2	31519.4				643	1934112	303688	1601792	2031680		38682.2	6073.76	32035.8	40633.6
	644	736368	116376	588496	749632		14727.4	2327.52	11769.9	14992.6				644	1125088	182736	904736	1207776		22501.8	3654.72	18094.7	24155.5				644	1595616	245300	1251264	1565440		31912.3	4906	25025.3	31308.8				644	1972704	299672	1587904	2019200		39454.1	5993.44	31758.1	40384
	645	745440	122278	596960	772848		14908.8	2445.56	11939.2	15457				645	1154432	175656	886848	1144192		23088.6	3513.12	17737	22883.8				645	1513344	238104	1256096	1589408		30266.9	4762.08	25121.9	31788.2				645	1944096	302160	1588448	1995808		38881.9	6043.2	31769	39916.2
	646	752256	122128	593216	773888		15045.1	2442.56	11864.3	15477.8				646	1134464	170400	921712	1186496		22689.3	3408	18434.2	23729.9				646	1554784	247732	1191104	1570272		31095.7	4954.64	23822.1	31405.4				646	1892160	291048	1573472	1977984		37843.2	5820.96	31469.4	39559.7
	647	745040	118748	602608	770320		14900.8	2374.96	12052.2	15406.4				647	1151648	175000	910032	1213696		23033	3500	18200.6	24273.9				647	1558848	249456	1260832	1555840		31177	4989.12	25216.6	31116.8				647	1948352	302368	1555200	2020128		38967	6047.36	31104	40402.6
	648	724400	112998	591728	776464		14488	2259.96	11834.6	15529.3				648	1171072	176112	916304	1172512		23421.4	3522.24	18326.1	23450.2				648	1511872	232836	1246176	1599776		30237.4	4656.72	24923.5	31995.5				648	1969248	310744	1577856	1989024		39385	6214.88	31557.1	39780.5
	649	727184	114812	611744	768000		14543.7	2296.24	12234.9	15360				649	1091392	178436	933440	1195232		21827.8	3568.72	18668.8	23904.6				649	1543680	228176	1224544	1584832		30873.6	4563.52	24490.9	31696.6				649	1945344	304344	1566624	2039776		38906.9	6086.88	31332.5	40795.5
	650	750144	116780	601056	759024		15002.9	2335.6	12021.1	15180.5				650	1126592	175000	909776	1182784		22531.8	3500	18195.5	23655.7				650	1529504	238560	1276928	1591104		30590.1	4771.2	25538.6	31822.1				650	1967040	302872	1552768	2061312		39340.8	6057.44	31055.4	41226.2
	651	733792	115872	605520	777600		14675.8	2317.44	12110.4	15552				651	1167840	177376	924352	1154976		23356.8	3547.52	18487	23099.5				651	1474880	239372	1233792	1550112		29497.6	4787.44	24675.8	31002.2				651	1966080	313792	1554304	2018624		39321.6	6275.84	31086.1	40372.5
	652	745552	113602	596848	746112		14911	2272.04	11937	14922.2				652	1148064	182228	927984	1195392		22961.3	3644.56	18559.7	23907.8				652	1552640	234356	1236256	1498400		31052.8	4687.12	24725.1	29968				652	1954016	296016	1582176	2038112		39080.3	5920.32	31643.5	40762.2
	653	737296	115822	579456	773168		14745.9	2316.44	11589.1	15463.4				653	1130880	173636	924256	1159264		22617.6	3472.72	18485.1	23185.3				653	1541408	242464	1268832	1586144		30828.2	4849.28	25376.6	31722.9				653	1942560	301608	1575488	1980224		38851.2	6032.16	31509.8	39604.5
	654	743024	118646	608496	780656		14860.5	2372.92	12169.9	15613.1				654	1152096	178284	903696	1176704		23041.9	3565.68	18073.9	23534.1				654	1511872	235724	1251680	1581600		30237.4	4714.48	25033.6	31632				654	1928064	306528	1596416	2047648		38561.3	6130.56	31928.3	40953
	655	746112	112442	595264	775488		14922.2	2248.84	11905.3	15509.8				655	1102944	172016	924928	1163712		22058.9	3440.32	18498.6	23274.2				655	1578336	245908	1214752	1531904		31566.7	4918.16	24295	30638.1				655	1945408	300536	1566912	2065280		38908.2	6010.72	31338.2	41305.6
	656	734000	119302	606960	773840		14680	2386.04	12139.2	15476.8				656	1159264	175252	925280	1174112		23185.3	3505.04	18505.6	23482.2				656	1537088	235672	1269088	1606080		30741.8	4713.44	25381.8	32121.6				656	1946144	300840	1548256	1966112		38922.9	6016.8	30965.1	39322.2
	657	716928	116880	605936	729504		14338.6	2337.6	12118.7	14590.1				657	1153920	177832	928096	1170464		23078.4	3556.64	18561.9	23409.3				657	1509408	230708	1255648	1611456		30188.2	4614.16	25113	32229.1				657	1946368	286376	1565280	1967680		38927.4	5727.52	31305.6	39353.6
	658	732288	115418	588032	763200		14645.8	2308.36	11760.6	15264				658	1116480	173888	915840	1198336		22329.6	3477.76	18316.8	23966.7				658	1557568	239120	1234624	1562784		31151.4	4782.4	24692.5	31255.7				658	1992160	293072	1553824	2050144		39843.2	5861.44	31076.5	41002.9
	659	737808	118294	608864	765312		14756.2	2365.88	12177.3	15306.2				659	1151936	179600	907024	1167168		23038.7	3592	18140.5	23343.4				659	1543936	242464	1281120	1600736		30878.7	4849.28	25622.4	32014.7				659	1977152	299776	1593696	2036416		39543	5995.52	31873.9	40728.3
	660	725440	113300	584384	776720		14508.8	2266	11687.7	15534.4				660	1130176	183444	936144	1162880		22603.5	3668.88	18722.9	23257.6				660	1546528	228128	1232704	1610720		30930.6	4562.56	24654.1	32214.4				660	1988896	306680	1567616	1989504		39777.9	6133.6	31352.3	39790.1
	661	739264	111384	591520	763456		14785.3	2227.68	11830.4	15269.1				661	1131776	175152	932304	1198592		22635.5	3503.04	18646.1	23971.8				661	1582112	242616	1243776	1585088		31642.2	4852.32	24875.5	31701.8				661	1985472	312520	1577184	1957440		39709.4	6250.4	31543.7	39148.8
	662	736832	117788	585872	742400		14736.6	2355.76	11717.4	14848				662	1158560	176060	901200	1183488		23171.2	3521.2	18024	23669.8				662	1526112	238916	1275904	1537568		30522.2	4778.32	25518.1	30751.4				662	1931200	308616	1609696	2055872		38624	6172.32	32193.9	41117.4
	663	713936	115014	587104	731776		14278.7	2300.28	11742.1	14635.5				663	1143040	175608	917296	1175072		22860.8	3512.16	18345.9	23501.4				663	1522400	241652	1230080	1621888		30448	4833.04	24601.6	32437.8				663	1919840	286424	1572128	2020064		38396.8	5728.48	31442.6	40401.3
	664	736208	114560	593216	760096		14724.2	2291.2	11864.3	15201.9				664	1132736	171564	939888	1170816		22654.7	3431.28	18797.8	23416.3				664	1551520	244488	1221760	1532640		31030.4	4889.76	24435.2	30652.8				664	1930912	295864	1553920	2024224		38618.2	5917.28	31078.4	40484.5
	665	737600	115570	614976	771408		14752	2311.4	12299.5	15428.2				665	1148256	181116	924192	1184352		22965.1	3622.32	18483.8	23687				665	1529312	243120	1251488	1644832		30586.2	4862.4	25029.8	32896.6				665	1983584	306224	1565856	2022560		39671.7	6124.48	31317.1	40451.2
	666	745504	111232	572752	774096		14910.1	2224.64	11455	15481.9				666	1109920	180460	953232	1196192		22198.4	3609.2	19064.6	23923.8				666	1553184	240892	1204096	1586848		31063.7	4817.84	24081.9	31737				666	2000992	300488	1591680	2021312		40019.8	6009.76	31833.6	40426.2
	667	737136	114258	591776	760720		14742.7	2285.16	11835.5	15214.4				667	1139904	167772	915632	1165536		22798.1	3355.44	18312.6	23310.7				667	1558816	243324	1229216	1562624		31176.3	4866.48	24584.3	31252.5				667	1929472	297488	1587328	2050752		38589.4	5949.76	31746.6	41015
	668	722544	111888	590800	782144		14450.9	2237.76	11816	15642.9				668	1143712	183292	909568	1208512		22874.2	3665.84	18191.4	24170.2				668	1520064	237700	1271712	1618336		30401.3	4754	25434.2	32366.7				668	1954880	309784	1601728	2032448		39097.6	6195.68	32034.6	40649
	669	739200	111736	602192	786896		14784	2234.72	12043.8	15737.9				669	1153600	187944	941648	1182304		23072	3758.88	18833	23646.1				669	1541088	232936	1233472	1547328		30821.8	4658.72	24669.4	30946.6				669	1947808	303128	1571328	2042528		38956.2	6062.56	31426.6	40850.6
	670	737808	113704	586336	757104		14756.2	2274.08	11726.7	15142.1				670	1129600	179804	929072	1207360		22592	3596.08	18581.4	24147.2				670	1547456	236736	1243392	1578304		30949.1	4734.72	24867.8	31566.1				670	1931936	297136	1604512	2037344		38638.7	5942.72	32090.2	40746.9
	671	713008	114510	597872	754624		14260.2	2290.2	11957.4	15092.5				671	1139168	168328	934992	1152960		22783.4	3366.56	18699.8	23059.2				671	1524224	235624	1242816	1667264		30484.5	4712.48	24856.3	33345.3				671	1901728	303128	1559872	2011168		38034.6	6062.56	31197.4	40223.4
	672	717856	114964	605376	784832		14357.1	2299.28	12107.5	15696.6				672	1136640	189308	930320	1184192		22732.8	3786.16	18606.4	23683.8				672	1549152	239120	1234272	1597056		30983	4782.4	24685.4	31941.1				672	1972896	307496	1562560	1974944		39457.9	6149.92	31251.2	39498.9
	673	734512	114914	594032	757616		14690.2	2298.28	11880.6	15152.3				673	1114688	174496	909456	1170720		22293.8	3489.92	18189.1	23414.4				673	1578016	243528	1262464	1592064		31560.3	4870.56	25249.3	31841.3				673	1971456	305568	1578336	2050784		39429.1	6111.36	31566.7	41015.7
	674	735440	111938	595472	770224		14708.8	2238.76	11909.4	15404.5				674	1198272	172676	902864	1190880		23965.4	3453.52	18057.3	23817.6				674	1497920	234456	1246752	1645408		29958.4	4689.12	24935	32908.2				674	1946144	303080	1563904	2050144		38922.9	6061.6	31278.1	41002.9
	675	723072	113956	585824	765104		14461.4	2279.12	11716.5	15302.1				675	1128064	172980	927616	1174240		22561.3	3459.6	18552.3	23484.8				675	1515296	235928	1213056	1569888		30305.9	4718.56	24261.1	31397.8				675	1964416	297848	1580800	2019168		39288.3	5956.96	31616	40383.4
	676	741584	116982	599264	771456		14831.7	2339.64	11985.3	15429.1				676	1151104	175860	892544	1175648		23022.1	3517.2	17850.9	23513				676	1517280	241652	1240736	1578240		30345.6	4833.04	24814.7	31564.8				676	1902976	297544	1621408	2014752		38059.5	5950.88	32428.2	40295
	677	729664	115922	605936	781072		14593.3	2318.44	12118.7	15621.4				677	1125568	174344	930640	1188960		22511.4	3486.88	18612.8	23779.2				677	1510944	239220	1247232	1631040		30218.9	4784.4	24944.6	32620.8				677	1935328	300688	1580896	1991488		38706.6	6013.76	31617.9	39829.8
	678	736928	113552	599216	758912		14738.6	2271.04	11984.3	15178.2				678	1120224	174748	932448	1215168		22404.5	3494.96	18649	24303.4				678	1532864	236688	1224032	1616832		30657.3	4733.76	24480.6	32336.6				678	1987360	305312	1545536	2007200		39747.2	6106.24	30910.7	40144
	679	755040	119454	587984	752768		15100.8	2389.08	11759.7	15055.4				679	1155648	174040	913456	1170720		23113	3480.8	18269.1	23414.4				679	1567840	247936	1244512	1584672		31356.8	4958.72	24890.2	31693.4				679	1918784	292008	1605024	1996448		38375.7	5840.16	32100.5	39929
	680	721728	114460	594752	772800		14434.6	2289.2	11895	15456				680	1144032	179096	904112	1159200		22880.6	3581.92	18082.2	23184				680	1540288	232584	1265344	1626368		30805.8	4651.68	25306.9	32527.4				680	1992576	305664	1589664	2071200		39851.5	6113.28	31793.3	41424
	681	738016	117738	609376	768768		14760.3	2354.76	12187.5	15375.4				681	1115200	178032	942064	1180192		22304	3560.64	18841.3	23603.8				681	1522528	243728	1209856	1588864		30450.6	4874.56	24197.1	31777.3				681	1949120	294296	1554144	2019872		38982.4	5885.92	31082.9	40397.4
	682	748752	114410	599728	766192		14975	2288.2	11994.6	15323.8				682	1120800	170856	914080	1194464		22416	3417.12	18281.6	23889.3				682	1519648	249608	1256000	1545472		30393	4992.16	25120	30909.4				682	1872192	303632	1603424	2005344		37443.8	6072.64	32068.5	40106.9
	683	754160	113452	585408	764960		15083.2	2269.04	11708.2	15299.2				683	1146016	171260	934368	1178528		22920.3	3425.2	18687.4	23570.6				683	1546976	229392	1242816	1596640		30939.5	4587.84	24856.3	31932.8				683	1958432	308512	1593984	1990432		39168.6	6170.24	31879.7	39808.6
	684	751168	111786	592128	772128		15023.4	2235.72	11842.6	15442.6				684	1133088	167316	933808	1209824		22661.8	3346.32	18676.2	24196.5				684	1502112	239120	1251392	1582848		30042.2	4782.4	25027.8	31657				684	1962880	303176	1589024	2015264		39257.6	6063.52	31780.5	40305.3
	685	748800	112744	612208	766288		14976	2254.88	12244.2	15325.8				685	1156960	169796	926736	1177472		23139.2	3395.92	18534.7	23549.4				685	1526016	243376	1256640	1592160		30520.3	4867.52	25132.8	31843.2				685	1882816	303992	1569888	2013664		37656.3	6079.84	31397.8	40273.3
	686	713472	117890	603168	776720		14269.4	2357.8	12063.4	15534.4				686	1163968	175204	928352	1196064		23279.4	3504.08	18567	23921.3				686	1504928	235472	1240448	1619008		30098.6	4709.44	24809	32380.2				686	1979104	297952	1533984	2003616		39582.1	5959.04	30679.7	40072.3
	687	731568	113602	583568	756544		14631.4	2272.04	11671.4	15130.9				687	1108320	174848	942784	1202016		22166.4	3496.96	18855.7	24040.3				687	1582496	239624	1260256	1580832		31649.9	4792.48	25205.1	31616.6				687	1973024	319432	1598336	2042912		39460.5	6388.64	31966.7	40858.2
	688	750448	117588	590640	753648		15009	2351.76	11812.8	15073				688	1110624	171716	916832	1179200		22212.5	3434.32	18336.6	23584				688	1527936	239576	1259776	1579456		30558.7	4791.52	25195.5	31589.1				688	1939808	313080	1552320	2084832		38796.2	6261.6	31046.4	41696.6
	689	730032	118092	601264	783136		14600.6	2361.84	12025.3	15662.7				689	1114688	173432	917856	1179680		22293.8	3468.64	18357.1	23593.6				689	1554880	229088	1231104	1599136		31097.6	4581.76	24622.1	31982.7				689	1949440	306024	1536992	1984000		38988.8	6120.48	30739.8	39680
	690	730128	113602	607424	766192		14602.6	2272.04	12148.5	15323.8				690	1122848	177224	917808	1205504		22457	3544.48	18356.2	24110.1				690	1543616	232888	1263680	1601312		30872.3	4657.76	25273.6	32026.2				690	1964992	313488	1597856	2023520		39299.8	6269.76	31957.1	40470.4
	691	744576	114208	608816	772752		14891.5	2284.16	12176.3	15455				691	1132736	179652	908880	1173920		22654.7	3593.04	18177.6	23478.4				691	1539488	238864	1246496	1609600		30789.8	4777.28	24929.9	32192				691	1992352	308816	1590304	2048032		39847	6176.32	31806.1	40960.6
	692	745136	114762	598800	788656		14902.7	2295.24	11976	15773.1				692	1119296	176872	937744	1168352		22385.9	3537.44	18754.9	23367				692	1545376	234608	1244192	1578496		30907.5	4692.16	24883.8	31569.9				692	1992512	302520	1580576	1987200		39850.2	6050.4	31611.5	39744
	693	741120	115872	580736	757568		14822.4	2317.44	11614.7	15151.4				693	1117920	178136	921712	1143456		22358.4	3562.72	18434.2	22869.1				693	1564160	242968	1283168	1553504		31283.2	4859.36	25663.4	31070.1				693	1988096	304600	1604064	2019872		39761.9	6092	32081.3	40397.4
	694	732608	114056	623808	761904		14652.2	2281.12	12476.2	15238.1				694	1154592	175556	946432	1175584		23091.8	3511.12	18928.6	23511.7				694	1544960	243932	1216160	1614880		30899.2	4878.64	24323.2	32297.6				694	1944096	299472	1592160	2014400		38881.9	5989.44	31843.2	40288
	695	724928	113854	596128	777344		14498.6	2277.08	11922.6	15546.9				695	1127968	175960	933184	1184960		22559.4	3519.2	18663.7	23699.2				695	1559008	230708	1246592	1557632		31180.2	4614.16	24931.8	31152.6				695	1970016	305920	1530144	1998080		39400.3	6118.4	30602.9	39961.6
	696	737344	112946	597168	760096		14746.9	2258.92	11943.4	15201.9				696	1109760	179652	910448	1181760		22195.2	3593.04	18209	23635.2				696	1594400	242512	1261152	1541280		31888	4850.24	25223	30825.6				696	1941472	310592	1584512	2058624		38829.4	6211.84	31690.2	41172.5
	697	735072	109972	604400	771664		14701.4	2199.44	12088	15433.3				697	1145760	183796	903392	1168256		22915.2	3675.92	18067.8	23365.1				697	1524064	232228	1298848	1633536		30481.3	4644.56	25977	32670.7				697	1912608	293176	1591040	2023264		38252.2	5863.52	31820.8	40465.3
	698	730496	112544	588848	759280		14609.9	2250.88	11777	15185.6				698	1146112	183240	907952	1188640		22922.2	3664.8	18159	23772.8				698	1534080	239828	1224928	1591776		30681.6	4796.56	24498.6	31835.5				698	1978240	305568	1567456	1994528		39564.8	6111.36	31349.1	39890.6
	699	742096	118042	596592	753600		14841.9	2360.84	11931.8	15072				699	1109344	178892	931776	1159552		22186.9	3577.84	18635.5	23191				699	1534880	238916	1229024	1648192		30697.6	4778.32	24580.5	32963.8				699	2005888	301248	1620864	2061440		40117.8	6024.96	32417.3	41228.8
	700	737040	117082	612464	787728		14740.8	2341.64	12249.3	15754.6				700	1126304	173080	895248	1175840		22526.1	3461.6	17905	23516.8				700	1524800	236992	1237952	1610880		30496	4739.84	24759	32217.6				700	1959136	296528	1520672	2060288		39182.7	5930.56	30413.4	41205.8
							14729.6	2294.11	11969	15301.5										22776.5	3544.97	18476.7	23625.4										30732.6	4772.01	24929.4	31833.1										39068.7	6066.51	31642.6	40455.2
							245.542	63.139	208.591	265.265										363.319	87.2758	316.858	367.923										502.085	107.682	404.939	524.871										613.183	128.651	485.262	625.86
							121.365	47.8969	109.403	123.699										150.919	59.5396	135.929	153.706										175.307	69.0797	157.89	178.418										197.658	77.8878	177.884	201.135
							60290.9	3986.53	43510.3	70365.5										132000	7617.06	100399	135367										252089	11595.4	163975	275489										375994	16551.1	235479	391700
							14729.6	2294.11	11969	15301.5										22776.5	3544.97	18476.7	23625.4										30732.6	4772.01	24929.4	31833.1										39068.7	6066.51	31642.6	40455.2
							45561.3	1692.42	31541.3	55064										109224	4072.09	81922.3	111742										221356	6823.39	139046	243656										336925	10484.6	203836	351245
							Xe129(LR)	Xe130(LR)	Xe131(LR)	Xe132(LR)										Xe129(LR)	Xe130(LR)	Xe131(LR)	Xe132(LR)										Xe129(LR)	Xe130(LR)	Xe131(LR)	Xe132(LR)										Xe129(LR)	Xe130(LR)	Xe131(LR)	Xe132(LR)
	GE off
	40 ml Xe-Ar	Xe129(LR)	Xe130(LR)	Xe131(LR)	Xe132(LR)		Xe129(LR)	Xe130(LR)	Xe131(LR)	Xe132(LR)				60 ml Xe-Ar	Xe129(LR)	Xe130(LR)	Xe131(LR)	Xe132(LR)		Xe129(LR)	Xe130(LR)	Xe131(LR)	Xe132(LR)				80 ml Xe-Ar	Xe129(LR)	Xe130(LR)	Xe131(LR)	Xe132(LR)		Xe129(LR)	Xe130(LR)	Xe131(LR)	Xe132(LR)				100 ml Xe-Ar	Xe129(LR)	Xe130(LR)	Xe131(LR)	Xe132(LR)		Xe129(LR)	Xe130(LR)	Xe131(LR)	Xe132(LR)
	/ min													/ min													/ min													/ min
	Sweeps	Intensities, cps					Counts							Sweeps	Intensities, cps					Counts							Sweeps	Intensities, cps					Counts							Sweeps	Intensities, cps					Counts
	1	1032752	155444	827904	1010928		20655	3108.88	16558.1	20218.6				1	1564960	255540	1271072	1673184		31299.2	5110.8	25421.4	33463.7				1	2093376	340832	1734752	2218048		41867.5	6816.64	34695	44361				1	2842048	439248	2242048	2798080		56841	8784.96	44841	55961.6
	2	986000	154232	813472	1074688		19720	3084.64	16269.4	21493.8				2	1589504	244236	1304512	1663200		31790.1	4884.72	26090.2	33264				2	2183360	332952	1782016	2206592		43667.2	6659.04	35640.3	44131.8				2	2767488	445984	2315072	2914624		55349.8	8919.68	46301.4	58292.5
	3	1002016	154788	774304	1025296		20040.3	3095.76	15486.1	20505.9				3	1588032	242008	1237504	1664800		31760.6	4840.16	24750.1	33296				3	2187264	338392	1795648	2266048		43745.3	6767.84	35913	45321				3	2929216	425520	2227584	2852928		58584.3	8510.4	44551.7	57058.6
	4	998480	159284	824384	1059808		19969.6	3185.68	16487.7	21196.2				4	1594304	246264	1309696	1636352		31886.1	4925.28	26193.9	32727				4	2177408	330664	1768640	2255040		43548.2	6613.28	35372.8	45100.8				4	2765760	460328	2252544	2850368		55315.2	9206.56	45050.9	57007.4
	5	993744	156960	822208	1051136		19874.9	3139.2	16444.2	21022.7				5	1629984	253664	1310592	1688000		32599.7	5073.28	26211.8	33760				5	2207232	343680	1787424	2237440		44144.6	6873.6	35748.5	44748.8				5	2674304	423432	2280000	2844416		53486.1	8468.64	45600	56888.3
	6	1041616	158576	821792	1014096		20832.3	3171.52	16435.8	20281.9				6	1587872	242464	1245440	1639712		31757.4	4849.28	24908.8	32794.2				6	2187840	339968	1812352	2225216		43756.8	6799.36	36247	44504.3				6	2760896	450528	2181632	2915520		55217.9	9010.56	43632.6	58310.4
	7	1011232	157920	822720	1053664		20224.6	3158.4	16454.4	21073.3				7	1606464	248340	1254848	1629120		32129.3	4966.8	25097	32582.4				7	2135872	330816	1763168	2261824		42717.4	6616.32	35263.4	45236.5				7	2793280	452520	2294336	2815104		55865.6	9050.4	45886.7	56302.1
	8	972672	158072	815024	1054432		19453.4	3161.44	16300.5	21088.6				8	1587808	245656	1351936	1637760		31756.2	4913.12	27038.7	32755.2				8	2233216	329392	1757184	2263296		44664.3	6587.84	35143.7	45265.9				8	2809408	440984	2312128	2903104		56188.2	8819.68	46242.6	58062.1
	9	1035408	163376	816320	1013168		20708.2	3267.52	16326.4	20263.4				9	1597152	251380	1258944	1649664		31943	5027.6	25178.9	32993.3				9	2196736	337984	1810656	2243008		43934.7	6759.68	36213.1	44860.2				9	2807616	440472	2235392	2823488		56152.3	8809.44	44707.8	56469.8
	10	988432	153776	858288	1022080		19768.6	3075.52	17165.8	20441.6				10	1607648	252092	1297152	1580032		32153	5041.84	25943	31600.6				10	2176448	334632	1725984	2194624		43529	6692.64	34519.7	43892.5				10	2736960	444760	2286272	2865344		54739.2	8895.2	45725.4	57306.9
	11	969664	152820	821072	1051872		19393.3	3056.4	16421.4	21037.4				11	1591424	250468	1301152	1627200		31828.5	5009.36	26023	32544				11	2244544	325328	1763232	2195072		44890.9	6506.56	35264.6	43901.4				11	2737344	427408	2249536	2845184		54746.9	8548.16	44990.7	56903.7
	12	1029264	150344	825152	1024000		20585.3	3006.88	16503	20480				12	1555296	245960	1279584	1634176		31105.9	4919.2	25591.7	32683.5				12	2181184	342104	1776704	2243776		43623.7	6842.08	35534.1	44875.5				12	2835136	422360	2224896	2863872		56702.7	8447.2	44497.9	57277.4
	13	980944	157164	816256	1052192		19618.9	3143.28	16325.1	21043.8				13	1564384	243324	1310752	1630080		31287.7	4866.48	26215	32601.6				13	2211008	346632	1761536	2217536		44220.2	6932.64	35230.7	44350.7				13	2760768	441336	2355904	2878656		55215.4	8826.72	47118.1	57573.1
	14	1029792	158476	806848	1053504		20595.8	3169.52	16137	21070.1				14	1604832	244136	1298464	1676064		32096.6	4882.72	25969.3	33521.3				14	2151232	334376	1783520	2256128		43024.6	6687.52	35670.4	45122.6				14	2756224	434808	2199168	2899328		55124.5	8696.16	43983.4	57986.6
	15	1027232	165396	813632	1045728		20544.6	3307.92	16272.6	20914.6				15	1576320	246060	1294912	1636992		31526.4	4921.2	25898.2	32739.8				15	2161344	340224	1809696	2261248		43226.9	6804.48	36193.9	45225				15	2773888	456496	2203008	2853760		55477.8	9129.92	44060.2	57075.2
	16	1030096	164284	856528	1018688		20601.9	3285.68	17130.6	20373.8				16	1533984	252600	1278656	1625760		30679.7	5052	25573.1	32515.2				16	2182400	328176	1751680	2240128		43648	6563.52	35033.6	44802.6				16	2750592	443536	2298752	2891776		55011.8	8870.72	45975	57835.5
	17	1009632	149888	822784	1055424		20192.6	2997.76	16455.7	21108.5				17	1562368	256044	1336480	1661600		31247.4	5120.88	26729.6	33232				17	2188800	327768	1825440	2227584		43776	6555.36	36508.8	44551.7				17	2747200	417824	2252800	2883840		54944	8356.48	45056	57676.8
	18	1051200	152668	808240	1029728		21024	3053.36	16164.8	20594.6				18	1616096	251228	1263776	1558048		32321.9	5024.56	25275.5	31161				18	2132992	338288	1742976	2182336		42659.8	6765.76	34859.5	43646.7				18	2811392	439656	2244992	2803904		56227.8	8793.12	44899.8	56078.1
	19	994736	168176	840432	1080928		19894.7	3363.52	16808.6	21618.6				19	1628800	257668	1338272	1631680		32576	5153.36	26765.4	32633.6				19	2157248	334272	1702336	2260416		43145	6685.44	34046.7	45208.3				19	2785984	444656	2262592	2858560		55719.7	8893.12	45251.8	57171.2
	20	1004576	154032	810624	1065088		20091.5	3080.64	16212.5	21301.8				20	1598688	250824	1286656	1612480		31973.8	5016.48	25733.1	32249.6				20	2180672	339304	1737568	2240640		43613.4	6786.08	34751.4	44812.8				20	2783552	433480	2242624	2855168		55671	8669.6	44852.5	57103.4
	21	1006080	161760	787824	1020256		20121.6	3235.2	15756.5	20405.1				21	1608736	245148	1284288	1639392		32174.7	4902.96	25685.8	32787.8				21	2122752	343224	1745600	2264064		42455	6864.48	34912	45281.3				21	2809344	438176	2260352	2831680		56186.9	8763.52	45207	56633.6
	22	995776	162516	850624	1081152		19915.5	3250.32	17012.5	21623				22	1622048	247632	1306112	1646976		32441	4952.64	26122.2	32939.5				22	2202560	335040	1772800	2306624		44051.2	6700.8	35456	46132.5				22	2771392	426744	2315072	2824960		55427.8	8534.88	46301.4	56499.2
	23	1000560	155648	805504	1046928		20011.2	3112.96	16110.1	20938.6				23	1585568	255844	1261248	1678304		31711.4	5116.88	25225	33566.1				23	2125760	332392	1760448	2222784		42515.2	6647.84	35209	44455.7				23	2837376	428224	2215296	2911936		56747.5	8564.48	44305.9	58238.7
	24	1033328	154788	827952	1050016		20666.6	3095.76	16559	21000.3				24	1577504	239068	1244192	1651392		31550.1	4781.36	24883.8	33027.8				24	2121216	343576	1759488	2244864		42424.3	6871.52	35189.8	44897.3				24	2852352	424552	2233280	2751168		57047	8491.04	44665.6	55023.4
	25	996976	154032	843680	1061632		19939.5	3080.64	16873.6	21232.6				25	1612576	255488	1299680	1615360		32251.5	5109.76	25993.6	32307.2				25	2291328	343224	1783616	2216128		45826.6	6864.48	35672.3	44322.6				25	2806656	425064	2256768	2876480		56133.1	8501.28	45135.4	57529.6
	26	1016240	151252	817600	1017184		20324.8	3025.04	16352	20343.7				26	1602144	258428	1297856	1591520		32042.9	5168.56	25957.1	31830.4				26	2167552	324160	1718848	2249856		43351	6483.2	34377	44997.1				26	2689280	428584	2193024	2924416		53785.6	8571.68	43860.5	58488.3
	27	1042768	157364	835152	993696		20855.4	3147.28	16703	19873.9				27	1604288	246616	1251328	1637376		32085.8	4932.32	25026.6	32747.5				27	2125760	343832	1764960	2253568		42515.2	6876.64	35299.2	45071.4				27	2771648	437104	2216640	2815616		55433	8742.08	44332.8	56312.3
	28	988912	156960	838816	1105760		19778.2	3139.2	16776.3	22115.2				28	1577696	245400	1285184	1603872		31553.9	4908	25703.7	32077.4				28	2164096	341392	1830144	2213952		43281.9	6827.84	36602.9	44279				28	2749120	424760	2294976	2899328		54982.4	8495.2	45899.5	57986.6
	29	1034736	156152	818080	1033648		20694.7	3123.04	16361.6	20673				29	1564960	239424	1331008	1687264		31299.2	4788.48	26620.2	33745.3				29	2153664	339256	1764352	2222656		43073.3	6785.12	35287	44453.1				29	2793856	437056	2257216	2768832		55877.1	8741.12	45144.3	55376.6
	30	1061888	160496	834944	1064384		21237.8	3209.92	16698.9	21287.7				30	1612416	253360	1242976	1605824		32248.3	5067.2	24859.5	32116.5				30	2215424	342664	1743136	2207360		44308.5	6853.28	34862.7	44147.2				30	2777472	444608	2296384	2867328		55549.4	8892.16	45927.7	57346.6
	31	994784	158376	833648	1046304		19895.7	3167.52	16673	20926.1				31	1610144	250520	1330368	1646176		32202.9	5010.4	26607.4	32923.5				31	2125824	329800	1777472	2267456		42516.5	6596	35549.4	45349.1				31	2788032	428840	2290944	2892544		55760.6	8576.8	45818.9	57850.9
	32	1029728	159132	817136	1042976		20594.6	3182.64	16342.7	20859.5				32	1554976	251432	1289792	1639136		31099.5	5028.64	25795.8	32782.7				32	2246400	338088	1757312	2180480		44928	6761.76	35146.2	43609.6				32	2874560	432304	2267712	2949312		57491.2	8646.08	45354.2	58986.2
	33	1045312	162516	827328	1040944		20906.2	3250.32	16546.6	20818.9				33	1593824	248492	1268192	1571872		31876.5	4969.84	25363.8	31437.4				33	2165056	338648	1765536	2241792		43301.1	6772.96	35310.7	44835.8				33	2823104	430728	2223296	2919040		56462.1	8614.56	44465.9	58380.8
	34	984848	160444	822576	1069632		19697	3208.88	16451.5	21392.6				34	1611360	252244	1389312	1596960		32227.2	5044.88	27786.2	31939.2				34	2218880	342560	1789344	2273088		44377.6	6851.2	35786.9	45461.8				34	2636736	433224	2267264	3018304		52734.7	8664.48	45345.3	60366.1
	35	1035936	155748	822928	1032288		20718.7	3114.96	16458.6	20645.8				35	1597920	245908	1230944	1686336		31958.4	4918.16	24618.9	33726.7				35	2195136	337680	1710560	2212096		43902.7	6753.6	34211.2	44241.9				35	2787328	434600	2237184	2922048		55746.6	8692	44743.7	58441
	36	991248	158676	829248	1048960		19825	3173.52	16585	20979.2				36	1611744	246008	1253856	1654688		32234.9	4920.16	25077.1	33093.8				36	2219904	346680	1704864	2229632		44398.1	6933.6	34097.3	44592.6				36	2865344	433376	2291904	2877376		57306.9	8667.52	45838.1	57547.5
	37	1002176	152364	817600	1081248		20043.5	3047.28	16352	21625				37	1560448	253512	1288288	1621408		31209	5070.24	25765.8	32428.2				37	2199488	346328	1793568	2330944		43989.8	6926.56	35871.4	46618.9				37	2712960	446240	2221376	2896320		54259.2	8924.8	44427.5	57926.4
	38	1039840	147212	797760	1002752		20796.8	2944.24	15955.2	20055				38	1590144	259492	1311840	1704576		31802.9	5189.84	26236.8	34091.5				38	2249152	322024	1771264	2233792		44983	6440.48	35425.3	44675.8				38	2806592	427560	2208192	2823616		56131.8	8551.2	44163.8	56472.3
	39	977728	153324	835408	1029104		19554.6	3066.48	16708.2	20582.1				39	1618048	254424	1300736	1665728		32361	5088.48	26014.7	33314.6				39	2134848	340480	1727744	2139136		42697	6809.6	34554.9	42782.7				39	2829824	446752	2305984	2915264		56596.5	8935.04	46119.7	58305.3
	40	977520	156204	798368	1075360		19550.4	3124.08	15967.4	21507.2				40	1594880	251888	1330368	1682880		31897.6	5037.76	26607.4	33657.6				40	2109696	339768	1739040	2324736		42193.9	6795.36	34780.8	46494.7				40	2738432	422872	2252992	2873088		54768.6	8457.44	45059.8	57461.8
	41	1064256	163832	815488	1031760		21285.1	3276.64	16309.8	20635.2				41	1577696	244944	1246272	1639392		31553.9	4898.88	24925.4	32787.8				41	2167616	335696	1792128	2254592		43352.3	6713.92	35842.6	45091.8				41	2942656	423128	2254528	2888256		58853.1	8462.56	45090.6	57765.1
	42	994320	161708	850464	1058560		19886.4	3234.16	17009.3	21171.2				42	1673184	242868	1276128	1602688		33463.7	4857.36	25522.6	32053.8				42	2258688	344952	1742656	2320320		45173.8	6899.04	34853.1	46406.4				42	2793216	438888	2291520	2877312		55864.3	8777.76	45830.4	57546.2
	43	1014160	150848	825984	1068000		20283.2	3016.96	16519.7	21360				43	1581472	250572	1359424	1704640		31629.4	5011.44	27188.5	34092.8				43	2202112	344240	1747776	2292928		44042.2	6884.8	34955.5	45858.6				43	2705536	423944	2191296	2871040		54110.7	8478.88	43825.9	57420.8
	44	1048736	162872	823088	1066752		20974.7	3257.44	16461.8	21335				44	1596480	240892	1277696	1658240		31929.6	4817.84	25553.9	33164.8				44	2097984	341744	1710464	2243968		41959.7	6834.88	34209.3	44879.4				44	2815616	438328	2237440	2792704		56312.3	8766.56	44748.8	55854.1
	45	987136	157312	840896	1029264		19742.7	3146.24	16817.9	20585.3				45	1636320	237752	1268192	1626304		32726.4	4755.04	25363.8	32526.1				45	2221824	339968	1776832	2254592		44436.5	6799.36	35536.6	45091.8				45	2801856	462984	2278784	2880448		56037.1	9259.68	45575.7	57609
	46	993488	156656	781120	1047344		19869.8	3133.12	15622.4	20946.9				46	1523840	248492	1293056	1657408		30476.8	4969.84	25861.1	33148.2				46	2158976	336256	1733312	2339584		43179.5	6725.12	34666.2	46791.7				46	2772992	431896	2202304	2977536		55459.8	8637.92	44046.1	59550.7
	47	1036240	159840	785824	1049056		20724.8	3196.8	15716.5	20981.1				47	1576704	243984	1264576	1677184		31534.1	4879.68	25291.5	33543.7				47	2186880	344952	1761632	2206208		43737.6	6899.04	35232.6	44124.2				47	2870336	437152	2253888	2802048		57406.7	8743.04	45077.8	56041
	48	988752	163324	846528	1077408		19775	3266.48	16930.6	21548.2				48	1634496	259088	1315200	1604704		32689.9	5181.76	26304	32094.1				48	2196096	340880	1781792	2190336		43921.9	6817.6	35635.8	43806.7				48	2727936	446440	2303040	2904640		54558.7	8928.8	46060.8	58092.8
	49	1022016	154888	819520	1058144		20440.3	3097.76	16390.4	21162.9				49	1562240	244236	1302368	1624128		31244.8	4884.72	26047.4	32482.6				49	2146432	344344	1739680	2270912		42928.6	6886.88	34793.6	45418.2				49	2749376	445016	2280576	2893248		54987.5	8900.32	45611.5	57865
	50	1043760	159488	834416	1024320		20875.2	3189.76	16688.3	20486.4				50	1581536	236280	1265632	1626880		31630.7	4725.6	25312.6	32537.6				50	2282176	353544	1774080	2227456		45643.5	7070.88	35481.6	44549.1				50	2870528	436288	2270720	2757696		57410.6	8725.76	45414.4	55153.9
	51	1011184	154232	854400	1068256		20223.7	3084.64	17088	21365.1				51	1646016	254320	1312000	1661504		32920.3	5086.4	26240	33230.1				51	2158592	337072	1808768	2291712		43171.8	6741.44	36175.4	45834.2				51	2725888	438840	2274112	2887936		54517.8	8776.8	45482.2	57758.7
	52	1020720	153576	796304	1046256		20414.4	3071.52	15926.1	20925.1				52	1573984	246416	1299488	1678976		31479.7	4928.32	25989.8	33579.5				52	2172352	321616	1784256	2253888		43447	6432.32	35685.1	45077.8				52	2773120	434248	2095232	2836608		55462.4	8684.96	41904.6	56732.2
	53	1044176	159032	829552	1032336		20883.5	3180.64	16591	20646.7				53	1590048	242616	1277664	1610784		31801	4852.32	25553.3	32215.7				53	2201984	328176	1772128	2226496		44039.7	6563.52	35442.6	44529.9				53	2806016	454712	2284544	2812864		56120.3	9094.24	45690.9	56257.3
	54	1002496	156000	820304	1057920		20049.9	3120	16406.1	21158.4				54	1602528	247984	1299360	1599328		32050.6	4959.68	25987.2	31986.6				54	2187776	348312	1818208	2299840		43755.5	6966.24	36364.2	45996.8				54	2754944	440424	2321920	2868288		55098.9	8808.48	46438.4	57365.8
	55	992032	162264	791600	1072576		19840.6	3245.28	15832	21451.5				55	1567872	246008	1304064	1750368		31357.4	4920.16	26081.3	35007.4				55	2219328	329600	1763776	2234368		44386.6	6592	35275.5	44687.4				55	2786880	440984	2192704	2837696		55737.6	8819.68	43854.1	56753.9
	56	1049600	161204	835248	1032176		20992	3224.08	16705	20643.5				56	1583456	248440	1285056	1633920		31669.1	4968.8	25701.1	32678.4				56	2139968	338040	1741792	2193024		42799.4	6760.8	34835.8	43860.5				56	2843264	453640	2342080	2845696		56865.3	9072.8	46841.6	56913.9
	57	985008	145848	828672	1081088		19700.2	2916.96	16573.4	21621.8				57	1560832	249356	1329696	1643552		31216.6	4987.12	26593.9	32871				57	2152640	338544	1834560	2252288		43052.8	6770.88	36691.2	45045.8				57	2731904	437056	2298176	3024192		54638.1	8741.12	45963.5	60483.8
	58	999680	146808	794864	1059296		19993.6	2936.16	15897.3	21185.9				58	1587008	244944	1281504	1684160		31740.2	4898.88	25630.1	33683.2				58	2213568	338904	1753760	2214976		44271.4	6778.08	35075.2	44299.5				58	2803776	428480	2192000	2793024		56075.5	8569.6	43840	55860.5
	59	1050848	155648	818080	1025408		21017	3112.96	16361.6	20508.2				59	1615712	253712	1271968	1665408		32314.2	5074.24	25439.4	33308.2				59	2217984	341744	1759616	2253056		44359.7	6834.88	35192.3	45061.1				59	2830400	459000	2315648	2876672		56608	9180	46313	57533.4
	60	985520	154536	810416	1056224		19710.4	3090.72	16208.3	21124.5				60	1539328	247528	1277248	1581792		30786.6	4950.56	25545	31635.8				60	2167936	332904	1837440	2264192		43358.7	6658.08	36748.8	45283.8				60	2697728	424552	2265088	2953728		53954.6	8491.04	45301.8	59074.6
	61	1009152	150748	789840	1037920		20183	3014.96	15796.8	20758.4				61	1549344	237904	1288864	1694720		30986.9	4758.08	25777.3	33894.4				61	2169472	336768	1729792	2221056		43389.4	6735.36	34595.8	44421.1				61	2847552	440064	2160000	2821184		56951	8801.28	43200	56423.7
	62	1015984	164032	825632	1054912		20319.7	3280.64	16512.6	21098.2				62	1687744	256096	1295968	1627680		33754.9	5121.92	25919.4	32553.6				62	2188800	354976	1767040	2067904		43776	7099.52	35340.8	41358.1				62	2815232	456040	2348096	2919616		56304.6	9120.8	46961.9	58392.3
	63	998800	151860	840368	1025200		19976	3037.2	16807.4	20504				63	1627904	241348	1332320	1708064		32558.1	4826.96	26646.4	34161.3				63	2118464	330968	1725984	2333056		42369.3	6619.36	34519.7	46661.1				63	2678336	431288	2276736	3022720		53566.7	8625.76	45534.7	60454.4
	64	1008224	154736	811712	1004112		20164.5	3094.72	16234.2	20082.2				64	1606784	237448	1295744	1625728		32135.7	4748.96	25914.9	32514.6				64	2206336	325176	1722688	2205312		44126.7	6503.52	34453.8	44106.2				64	2840512	438480	2141568	2884288		56810.2	8769.6	42831.4	57685.8
	65	1030352	163832	810528	1037600		20607	3276.64	16210.6	20752				65	1598848	248744	1250176	1618656		31977	4974.88	25003.5	32373.1				65	2251456	354208	1815840	2179200		45029.1	7084.16	36316.8	43584				65	2789696	446752	2303424	2888640		55793.9	8935.04	46068.5	57772.8
	66	997968	155140	804880	1058336		19959.4	3102.8	16097.6	21166.7				66	1617376	254372	1317856	1682144		32347.5	5087.44	26357.1	33642.9				66	2157504	329240	1815424	2313920		43150.1	6584.8	36308.5	46278.4				66	2643392	434040	2289472	3052992		52867.8	8680.8	45789.4	61059.8
	67	1046784	158224	820608	1037712		20935.7	3164.48	16412.2	20754.2				67	1605504	250620	1273408	1674976		32110.1	5012.4	25468.2	33499.5				67	2247040	333304	1792672	2223040		44940.8	6666.08	35853.4	44460.8				67	2871232	431800	2317312	2772736		57424.6	8636	46346.2	55454.7
	68	1043392	164284	827952	1059904		20867.8	3285.68	16559	21198.1				68	1611680	240284	1270560	1646016		32233.6	4805.68	25411.2	32920.3				68	2119424	350040	1769024	2254976		42388.5	7000.8	35380.5	45099.5				68	2834688	443024	2361856	2883968		56693.8	8860.48	47237.1	57679.4
	69	1004000	154332	815072	1017952		20080	3086.64	16301.4	20359				69	1604704	254068	1312320	1681600		32094.1	5081.36	26246.4	33632				69	2118400	334784	1737376	2244544		42368	6695.68	34747.5	44890.9				69	2705664	420016	2192384	2966464		54113.3	8400.32	43847.7	59329.3
	70	1016816	154184	818480	993024		20336.3	3083.68	16369.6	19860.5				70	1567456	241196	1298592	1613920		31349.1	4823.92	25971.8	32278.4				70	2131072	339456	1734752	2163136		42621.4	6789.12	34695	43262.7				70	2995264	433688	2258048	2743808		59905.3	8673.76	45161	54876.2
	71	1002336	160548	857312	1060320		20046.7	3210.96	17146.2	21206.4				71	1629024	261624	1279168	1637760		32580.5	5232.48	25583.4	32755.2				71	2134400	323552	1814304	2221184		42688	6471.04	36286.1	44423.7				71	2740800	433528	2243200	2830784		54816	8670.56	44864	56615.7
	72	1014368	154332	827536	1044800		20287.4	3086.64	16550.7	20896				72	1592256	250012	1296544	1647936		31845.1	5000.24	25930.9	32958.7				72	2164096	336712	1742816	2320512		43281.9	6734.24	34856.3	46410.2				72	2745216	417056	2191104	2917440		54904.3	8341.12	43822.1	58348.8
	73	1037024	162216	811088	1009728		20740.5	3244.32	16221.8	20194.6				73	1609184	241400	1269888	1631200		32183.7	4828	25397.8	32624				73	2201024	337784	1744096	2248064		44020.5	6755.68	34881.9	44961.3				73	2848768	431440	2257344	2811648		56975.4	8628.8	45146.9	56233
	74	992032	159184	848448	1081216		19840.6	3183.68	16969	21624.3				74	1593824	250672	1292736	1610464		31876.5	5013.44	25854.7	32209.3				74	2047648	331424	1818624	2233280		40953	6628.48	36372.5	44665.6				74	2801408	453080	2362752	2880256		56028.2	9061.6	47255	57605.1
	75	991712	152768	819888	1024000		19834.2	3055.36	16397.8	20480				75	1549248	251836	1280032	1717280		30985	5036.72	25600.6	34345.6				75	1980928	330616	1765376	2318400		39618.6	6612.32	35307.5	46368				75	2799040	404056	2243008	2812992		55980.8	8081.12	44860.2	56259.8
	76	1020400	158172	813824	1067008		20408	3163.44	16276.5	21340.2				76	1569280	246212	1246880	1660480		31385.6	4924.24	24937.6	33209.6				76	2189504	349680	1736192	2203584		43790.1	6993.6	34723.8	44071.7				76	2855104	435984	2256320	2820096		57102.1	8719.68	45126.4	56401.9
	77	1005824	151352	848448	1076288		20116.5	3027.04	16969	21525.8				77	1651904	257312	1364800	1673024		33038.1	5146.24	27296	33460.5				77	2147648	342304	1831072	2251136		42953	6846.08	36621.4	45022.7				77	2806272	449712	2272000	2946176		56125.4	8994.24	45440	58923.5
	78	1007488	155292	817408	1035152		20149.8	3105.84	16348.2	20703				78	1598752	240792	1286752	1713984		31975	4815.84	25735	34279.7				78	2145536	329904	1747680	2255232		42910.7	6598.08	34953.6	45104.6				78	2844352	410888	2198272	2908736		56887	8217.76	43965.4	58174.7
	79	1034416	163476	818176	1028480		20688.3	3269.52	16363.5	20569.6				79	1603968	248240	1272928	1612256		32079.4	4964.8	25458.6	32245.1				79	2177024	338136	1780448	2238976		43540.5	6762.72	35609	44779.5				79	2877376	440728	2263296	2901312		57547.5	8814.56	45265.9	58026.2
	80	1013008	161456	828832	1083968		20260.2	3229.12	16576.6	21679.4				80	1638080	244744	1284320	1575648		32761.6	4894.88	25686.4	31513				80	2102272	343120	1811872	2242624		42045.4	6862.4	36237.4	44852.5				80	2655104	428784	2188096	2911104		53102.1	8575.68	43761.9	58222.1
	81	1031136	155244	786384	1032752		20622.7	3104.88	15727.7	20655				81	1556352	247072	1297472	1633440		31127	4941.44	25949.4	32668.8				81	2234752	336152	1791584	2282880		44695	6723.04	35831.7	45657.6				81	2770368	418688	2190400	2836736		55407.4	8373.76	43808	56734.7
	82	1031392	156252	814304	1049024		20627.8	3125.04	16286.1	20980.5				82	1620032	244288	1274336	1659840		32400.6	4885.76	25486.7	33196.8				82	2223296	342408	1756224	2164224		44465.9	6848.16	35124.5	43284.5				82	2811904	449864	2262464	2870976		56238.1	8997.28	45249.3	57419.5
	83	971424	158576	824960	1055232		19428.5	3171.52	16499.2	21104.6				83	1646112	260204	1355232	1650432		32922.2	5204.08	27104.6	33008.6				83	2174144	328024	1748096	2345152		43482.9	6560.48	34961.9	46903				83	2704384	441080	2335872	2954368		54087.7	8821.6	46717.4	59087.4
	84	1021552	161608	794544	1055264		20431	3232.16	15890.9	21105.3				84	1534176	249052	1253120	1679776		30683.5	4981.04	25062.4	33595.5				84	2199936	337376	1770400	2294976		43998.7	6747.52	35408	45899.5				84	2832256	434296	2239424	2749952		56645.1	8685.92	44788.5	54999
	85	1021808	168128	830224	1063200		20436.2	3362.56	16604.5	21264				85	1633056	251636	1242912	1616416		32661.1	5032.72	24858.2	32328.3				85	2218752	348056	1757312	2156288		44375	6961.12	35146.2	43125.8				85	2817088	448128	2223936	2849088		56341.8	8962.56	44478.7	56981.8
	86	977456	157768	847728	1071168		19549.1	3155.36	16954.6	21423.4				86	1571488	250316	1278400	1623104		31429.8	5006.32	25568	32462.1				86	2128384	334224	1761056	2251328		42567.7	6684.48	35221.1	45026.6				86	2830336	443632	2284992	2943168		56606.7	8872.64	45699.8	58863.4
	87	1048080	158072	813216	1040528		20961.6	3161.44	16264.3	20810.6				87	1588352	236484	1295072	1706496		31767	4729.68	25901.4	34129.9				87	2209344	329392	1750624	2220480		44186.9	6587.84	35012.5	44409.6				87	2783680	413288	2218176	2918080		55673.6	8265.76	44363.5	58361.6
	88	1039120	153172	831472	1065088		20782.4	3063.44	16629.4	21301.8				88	1561248	245352	1264512	1601088		31225	4907.04	25290.2	32021.8				88	2247168	330512	1761216	2143040		44943.4	6610.24	35224.3	42860.8				88	2864704	442256	2315520	2841920		57294.1	8845.12	46310.4	56838.4
	89	1002592	155696	822464	1086624		20051.8	3113.92	16449.3	21732.5				89	1628448	260660	1325568	1643616		32569	5213.2	26511.4	32872.3				89	2092672	326600	1808736	2290112		41853.4	6532	36174.7	45802.2				89	2654720	419656	2269120	2873920		53094.4	8393.12	45382.4	57478.4
	90	1002336	160344	811296	1037856		20046.7	3206.88	16225.9	20757.1				90	1581376	241552	1288160	1654912		31627.5	4831.04	25763.2	33098.2				90	2172352	328272	1693984	2120448		43447	6565.44	33879.7	42409				90	2919360	416856	2221760	2782272		58387.2	8337.12	44435.2	55645.4
	91	1041456	159840	831568	1060640		20829.1	3196.8	16631.4	21212.8				91	1618496	241856	1296320	1584512		32369.9	4837.12	25926.4	31690.2				91	2209536	333208	1791584	2224128		44190.7	6664.16	35831.7	44482.6				91	2857536	447464	2245888	2848704		57150.7	8949.28	44917.8	56974.1
	92	991776	159336	822720	1055264		19835.5	3186.72	16454.4	21105.3				92	1635712	252548	1319264	1588928		32714.2	5050.96	26385.3	31778.6				92	2168384	337016	1796768	2285504		43367.7	6740.32	35935.4	45710.1				92	2655680	442768	2347712	2884800		53113.6	8855.36	46954.2	57696
	93	1014464	150696	813008	969760		20289.3	3013.92	16260.2	19395.2				93	1544096	244592	1259776	1690624		30881.9	4891.84	25195.5	33812.5				93	2195584	341648	1721824	2164608		43911.7	6832.96	34436.5	43292.2				93	2866816	430672	2175680	2794944		57336.3	8613.44	43513.6	55898.9
	94	1000416	151000	860368	1035312		20008.3	3020	17207.4	20706.2				94	1592544	262128	1284064	1584416		31850.9	5242.56	25681.3	31688.3				94	2188288	340224	1790944	2252608		43765.8	6804.48	35818.9	45052.2				94	2706112	453184	2296064	2746176		54122.2	9063.68	45921.3	54923.5
	95	1010464	152060	825632	1066688		20209.3	3041.2	16512.6	21333.8				95	1544192	251228	1327904	1646496		30883.8	5024.56	26558.1	32929.9				95	2091648	332952	1725152	2394176		41833	6659.04	34503	47883.5				95	2746880	418176	2229184	3020224		54937.6	8363.52	44583.7	60404.5
	96	1021808	159740	846272	1031712		20436.2	3194.8	16925.4	20634.2				96	1543296	247580	1305856	1667520		30865.9	4951.6	26117.1	33350.4				96	2225984	324616	1741952	2185152		44519.7	6492.32	34839	43703				96	2797184	443536	2225856	2836608		55943.7	8870.72	44517.1	56732.2
	97	1009680	159132	829616	1051968		20193.6	3182.64	16592.3	21039.4				97	1608640	254472	1260416	1614336		32172.8	5089.44	25208.3	32286.7				97	2155776	356600	1745696	2232448		43115.5	7132	34913.9	44649				97	2756416	445216	2338816	2775296		55128.3	8904.32	46776.3	55505.9
	98	1008160	165448	813936	1017184		20163.2	3308.96	16278.7	20343.7				98	1576800	244744	1316096	1691264		31536	4894.88	26321.9	33825.3				98	2176832	325936	1795232	2243840		43536.6	6518.72	35904.6	44876.8				98	2702848	433688	2171712	2908928		54057	8673.76	43434.2	58178.6
	99	1040944	161812	825728	1049152		20818.9	3236.24	16514.6	20983				99	1630720	242664	1288384	1622528		32614.4	4853.28	25767.7	32450.6				99	2204544	325680	1714400	2213504		44090.9	6513.6	34288	44270.1				99	2872896	444808	2237696	2832448		57457.9	8896.16	44753.9	56649
	100	1014992	160852	844880	1032704		20299.8	3217.04	16897.6	20654.1				100	1631744	259796	1263552	1619072		32634.9	5195.92	25271	32381.4				100	2188800	333512	1809376	2192256		43776	6670.24	36187.5	43845.1				100	2799424	440880	2323136	2883904		55988.5	8817.6	46462.7	57678.1
	101	1015360	153524	794192	1056672		20307.2	3070.48	15883.8	21133.4				101	1599072	244236	1302624	1733696		31981.4	4884.72	26052.5	34673.9				101	2127808	336000	1771136	2286528		42556.2	6720	35422.7	45730.6				101	2765632	431696	2232576	2932224		55312.6	8633.92	44651.5	58644.5
	102	1025984	157464	814352	1055328		20519.7	3149.28	16287	21106.6				102	1571872	245908	1274080	1616768		31437.4	4918.16	25481.6	32335.4				102	2191488	336000	1768896	2165568		43829.8	6720	35377.9	43311.4				102	2869184	438688	2102336	2823488		57383.7	8773.76	42046.7	56469.8
	103	1018576	158528	828784	1049952		20371.5	3170.56	16575.7	20999				103	1627360	252192	1292224	1633824		32547.2	5043.84	25844.5	32676.5				103	2212096	341952	1825856	2280192		44241.9	6839.04	36517.1	45603.8				103	2723392	456448	2379200	3000896		54467.8	9128.96	47584	60017.9
	104	1019152	163376	826144	1046880		20383	3267.52	16522.9	20937.6				104	1526816	237700	1281952	1676480		30536.3	4754	25639	33529.6				104	2137728	332848	1684736	2259648		42754.6	6656.96	33694.7	45193				104	2802816	415936	2240640	2926336		56056.3	8318.72	44812.8	58526.7
	105	1016192	162620	847056	1040416		20323.8	3252.4	16941.1	20808.3				105	1658880	241296	1276512	1625888		33177.6	4825.92	25530.2	32517.8				105	2231488	334528	1735872	2188928		44629.8	6690.56	34717.4	43778.6				105	2806272	438632	2221056	2795520		56125.4	8772.64	44421.1	55910.4
	106	992864	160192	829712	1052768		19857.3	3203.84	16594.2	21055.4				106	1631744	239220	1316736	1610400		32634.9	4784.4	26334.7	32208				106	2154368	341344	1743072	2314176		43087.4	6826.88	34861.4	46283.5				106	2691904	435216	2284416	2946304		53838.1	8704.32	45688.3	58926.1
	107	1010816	161812	815280	1022592		20216.3	3236.24	16305.6	20451.8				107	1520512	243680	1302368	1628320		30410.2	4873.6	26047.4	32566.4				107	2198144	334016	1764256	2275328		43962.9	6680.32	35285.1	45506.6				107	2709120	414920	2184832	2916928		54182.4	8298.4	43696.6	58338.6
	108	1016400	163528	819888	1025248		20328	3270.56	16397.8	20505				108	1645408	241500	1266784	1650272		32908.2	4830	25335.7	33005.4				108	2220736	351920	1695040	2184512		44414.7	7038.4	33900.8	43690.2				108	2725952	446752	2213952	2851648		54519	8935.04	44279	57033
	109	988176	155092	811088	1057248		19763.5	3101.84	16221.8	21145				109	1634624	250824	1329056	1650464		32692.5	5016.48	26581.1	33009.3				109	2207744	341592	1771040	2280320		44154.9	6831.84	35420.8	45606.4				109	2734144	421032	2278528	2865728		54682.9	8420.64	45570.6	57314.6
	110	1018016	151000	825824	1057888		20360.3	3020	16516.5	21157.8				110	1560608	250672	1290784	1664608		31212.2	5013.44	25815.7	33292.2				110	2226496	338088	1711776	2289344		44529.9	6761.76	34235.5	45786.9				110	2796352	428536	2188544	2843392		55927	8570.72	43770.9	56867.8
	111	1005616	168024	855856	1065088		20112.3	3360.48	17117.1	21301.8				111	1594560	243880	1279552	1562848		31891.2	4877.6	25591	31257				111	2193792	338496	1767296	2208896		43875.8	6769.92	35345.9	44177.9				111	2786176	438072	2266944	2862016		55723.5	8761.44	45338.9	57240.3
	112	980576	150800	803072	1060448		19611.5	3016	16061.4	21209				112	1624832	241652	1322944	1609440		32496.6	4833.04	26458.9	32188.8				112	2124288	340832	1794496	2292992		42485.8	6816.64	35889.9	45859.8				112	2770496	423024	2178560	2923392		55409.9	8460.48	43571.2	58467.8
	113	1029792	154232	807776	1055072		20595.8	3084.64	16155.5	21101.4				113	1569152	246516	1289536	1680896		31383	4930.32	25790.7	33617.9				113	2192320	322784	1767456	2236480		43846.4	6455.68	35349.1	44729.6				113	2778432	442720	2230528	2872256		55568.6	8854.4	44610.6	57445.1
	114	1035680	167572	807008	1025040		20713.6	3351.44	16140.2	20500.8				114	1629760	250268	1302464	1584928		32595.2	5005.36	26049.3	31698.6				114	2167616	338240	1780032	2158208		43352.3	6764.8	35600.6	43164.2				114	2799616	443840	2250432	2854656		55992.3	8876.8	45008.6	57093.1
	115	1016240	154940	831424	1034368		20324.8	3098.8	16628.5	20687.4				115	1612000	252192	1311488	1666144		32240	5043.84	26229.8	33322.9				115	2154688	347544	1761632	2363904		43093.8	6950.88	35232.6	47278.1				115	2722560	433736	2206976	2882112		54451.2	8674.72	44139.5	57642.2
	116	1007696	156304	851344	1071904		20153.9	3126.08	17026.9	21438.1				116	1545760	243120	1263136	1649664		30915.2	4862.4	25262.7	32993.3				116	2217344	332088	1666944	2244416		44346.9	6641.76	33338.9	44888.3				116	2802112	417520	2222848	2762560		56042.2	8350.4	44457	55251.2
	117	1023328	151504	847728	1044016		20466.6	3030.08	16954.6	20880.3				117	1644928	260100	1316512	1566880		32898.6	5202	26330.2	31337.6				117	2196992	346784	1797760	2207616		43939.8	6935.68	35955.2	44152.3				117	2820224	430112	2265856	2930752		56404.5	8602.24	45317.1	58615
	118	1028736	151304	813312	1035472		20574.7	3026.08	16266.2	20709.4				118	1550272	264360	1353088	1629408		31005.4	5287.2	27061.8	32588.2				118	2081824	333616	1719680	2278016		41636.5	6672.32	34393.6	45560.3				118	2699392	433280	2271296	2914240		53987.8	8665.6	45425.9	58284.8
	119	991040	162516	809328	1034208		19820.8	3250.32	16186.6	20684.2				119	1516256	247680	1277952	1666528		30325.1	4953.6	25559	33330.6				119	2202240	329392	1680896	2242560		44044.8	6587.84	33617.9	44851.2				119	2890688	439448	2201408	2825600		57813.8	8788.96	44028.2	56512
	120	1016288	157820	836240	1001600		20325.8	3156.4	16724.8	20032				120	1635680	249760	1293472	1608160		32713.6	4995.2	25869.4	32163.2				120	2160320	328072	1772320	2257088		43206.4	6561.44	35446.4	45141.8				120	2762880	446904	2296960	2841472		55257.6	8938.08	45939.2	56829.4
	121	998064	154184	836848	1027968		19961.3	3083.68	16737	20559.4				121	1560928	249660	1341376	1693920		31218.6	4993.2	26827.5	33878.4				121	2165504	334528	1755968	2309184		43310.1	6690.56	35119.4	46183.7				121	2764928	415376	2254016	2907264		55298.6	8307.52	45080.3	58145.3
	122	1033424	156760	794448	1057568		20668.5	3135.2	15889	21151.4				122	1570112	254016	1296544	1658880		31402.2	5080.32	25930.9	33177.6				122	2204352	325784	1695456	2140736		44087	6515.68	33909.1	42814.7				122	2776320	445928	2202752	2857792		55526.4	8918.56	44055	57155.8
	123	1015664	160496	815904	1036304		20313.3	3209.92	16318.1	20726.1				123	1596896	254928	1339552	1610016		31937.9	5098.56	26791	32200.3				123	2147328	348616	1781632	2279296		42946.6	6972.32	35632.6	45585.9				123	2827008	444144	2353152	2885440		56540.2	8882.88	47063	57708.8
	124	1012912	157312	813824	1028896		20258.2	3146.24	16276.5	20577.9				124	1572704	246516	1299904	1659360		31454.1	4930.32	25998.1	33187.2				124	2109696	325784	1801120	2261312		42193.9	6515.68	36022.4	45226.2				124	2748672	420272	2287040	2896000		54973.4	8405.44	45740.8	57920
	125	1019472	165396	829344	1043488		20389.4	3307.92	16586.9	20869.8				125	1570592	237192	1275616	1658144		31411.8	4743.84	25512.3	33162.9				125	2221120	341088	1786496	2243328		44422.4	6821.76	35729.9	44866.6				125	2816896	443072	2209344	2774208		56337.9	8861.44	44186.9	55484.2
	126	1003792	152920	799664	1045632		20075.8	3058.4	15993.3	20912.6				126	1623008	240184	1279008	1627488		32460.2	4803.68	25580.2	32549.8				126	2143872	341344	1838880	2229312		42877.4	6826.88	36777.6	44586.2				126	2791616	429040	2282112	2864960		55832.3	8580.8	45642.2	57299.2
	127	1012432	161912	826352	1045680		20248.6	3238.24	16527	20913.6				127	1639872	262328	1327840	1653952		32797.4	5246.56	26556.8	33079				127	2111168	335392	1762368	2278208		42223.4	6707.84	35247.4	45564.2				127	2786560	435112	2255744	2869824		55731.2	8702.24	45114.9	57396.5
	128	1028592	158528	821584	1030464		20571.8	3170.56	16431.7	20609.3				128	1625248	245504	1252576	1611104		32505	4910.08	25051.5	32222.1				128	2210304	345056	1727872	2139136		44206.1	6901.12	34557.4	42782.7				128	2802304	433176	2220736	2759360		56046.1	8663.52	44414.7	55187.2
	129	1003168	156708	838352	1039168		20063.4	3134.16	16767	20783.4				129	1610400	240688	1342848	1634880		32208	4813.76	26857	32697.6				129	2211712	341136	1827040	2237824		44234.2	6822.72	36540.8	44756.5				129	2741760	442768	2382272	2909248		54835.2	8855.36	47645.4	58185
	130	1034688	153424	873520	1022592		20693.8	3068.48	17470.4	20451.8				130	1568800	249052	1283744	1696896		31376	4981.04	25674.9	33937.9				130	2124992	325176	1740160	2272064		42499.8	6503.52	34803.2	45441.3				130	2784384	433280	2245056	2852864		55687.7	8665.6	44901.1	57057.3
	131	1032288	158224	840016	1064384		20645.8	3164.48	16800.3	21287.7				131	1584736	246568	1261312	1646848		31694.7	4931.36	25226.2	32937				131	2293184	343632	1758048	2159168		45863.7	6872.64	35161	43183.4				131	2842496	438024	2188096	2832768		56849.9	8760.48	43761.9	56655.4
	132	1020096	155596	830224	1062944		20401.9	3111.92	16604.5	21258.9				132	1566656	252292	1273024	1632704		31333.1	5045.84	25460.5	32654.1				132	2143872	336920	1810752	2258880		42877.4	6738.4	36215	45177.6				132	2801536	410432	2248320	2841600		56030.7	8208.64	44966.4	56832
	133	1013952	162112	816464	1074688		20279	3242.24	16329.3	21493.8				133	1583616	244440	1286912	1666208		31672.3	4888.8	25738.2	33324.2				133	2244096	323344	1711936	2277824		44881.9	6466.88	34238.7	45556.5				133	2703936	438176	2262528	2915520		54078.7	8763.52	45250.6	58310.4
	134	1023472	154184	836800	1030304		20469.4	3083.68	16736	20606.1				134	1608000	252496	1288576	1551008		32160	5049.92	25771.5	31020.2				134	2269888	341904	1754304	2193344		45397.8	6838.08	35086.1	43866.9				134	2791808	451288	2310912	2855360		55836.2	9025.76	46218.2	57107.2
	135	1023680	154132	824800	1034208		20473.6	3082.64	16496	20684.2				135	1560832	248592	1289024	1666080		31216.6	4971.84	25780.5	33321.6				135	2178496	344040	1775584	2235200		43569.9	6880.8	35511.7	44704				135	2779520	440928	2235456	2866112		55590.4	8818.56	44709.1	57322.2
	136	1031296	154688	839808	1025360		20625.9	3093.76	16796.2	20507.2				136	1583712	249100	1330464	1671456		31674.2	4982	26609.3	33429.1				136	2095488	339152	1739136	2314176		41909.8	6783.04	34782.7	46283.5				136	2713344	422568	2263232	2933824		54266.9	8451.36	45264.6	58676.5
	137	1011968	151252	809856	1008944		20239.4	3025.04	16197.1	20178.9				137	1620128	246568	1277184	1629088		32402.6	4931.36	25543.7	32581.8				137	2248064	336712	1713248	2246656		44961.3	6734.24	34265	44933.1				137	2816192	431544	2281856	2857152		56323.8	8630.88	45637.1	57143
	138	1009056	152868	807008	1034064		20181.1	3057.36	16140.2	20681.3				138	1611936	251684	1296832	1665408		32238.7	5033.68	25936.6	33308.2				138	2105792	327616	1729472	2359296		42115.8	6552.32	34589.4	47185.9				138	2649024	434760	2250176	2740544		52980.5	8695.2	45003.5	54810.9
	139	1009056	163628	809328	1049792		20181.1	3272.56	16186.6	20995.8				139	1599328	254524	1285376	1635776		31986.6	5090.48	25707.5	32715.5				139	2158976	328376	1710496	2214592		43179.5	6567.52	34209.9	44291.8				139	2871744	424144	2236992	2808256		57434.9	8482.88	44739.8	56165.1
	140	1005616	153776	841152	1028224		20112.3	3075.52	16823	20564.5				140	1609920	256452	1320576	1595872		32198.4	5129.04	26411.5	31917.4				140	2221888	341592	1750624	2189568		44437.8	6831.84	35012.5	43791.4				140	2879104	444912	2215104	2943680		57582.1	8898.24	44302.1	58873.6
	141	1028640	158072	848400	1015568		20572.8	3161.44	16968	20311.4				141	1565440	250316	1335808	1621984		31308.8	5006.32	26716.2	32439.7				141	2123456	329648	1828128	2313408		42469.1	6592.96	36562.6	46268.2				141	2646144	434040	2296896	2890752		52922.9	8680.8	45937.9	57815
	142	978608	150496	822160	1044064		19572.2	3009.92	16443.2	20881.3				142	1566144	237448	1308416	1652832		31322.9	4748.96	26168.3	33056.6				142	2227264	324872	1739360	2158336		44545.3	6497.44	34787.2	43166.7				142	2797248	432664	2168832	2843520		55945	8653.28	43376.6	56870.4
	143	1024576	152968	802256	1059136		20491.5	3059.36	16045.1	21182.7				143	1625760	247884	1262720	1614400		32515.2	4957.68	25254.4	32288				143	2224704	334936	1766720	2204480		44494.1	6698.72	35334.4	44089.6				143	2793536	422416	2220800	2854336		55870.7	8448.32	44416	57086.7
	144	1015776	158020	842800	1025872		20315.5	3160.4	16856	20517.4				144	1609760	239828	1351456	1642176		32195.2	4796.56	27029.1	32843.5				144	2110272	328584	1787264	2269312		42205.4	6571.68	35745.3	45386.2				144	2751744	448176	2254208	2998144		55034.9	8963.52	45084.2	59962.9
	145	1021552	159788	835456	1036032		20431	3195.76	16709.1	20720.6				145	1555520	255080	1310784	1636320		31110.4	5101.6	26215.7	32726.4				145	2184320	335696	1762016	2286528		43686.4	6713.92	35240.3	45730.6				145	2779456	432872	2277440	2852224		55589.1	8657.44	45548.8	57044.5
	146	1026240	156908	822000	1053120		20524.8	3138.16	16440	21062.4				146	1616192	257464	1293696	1626720		32323.8	5149.28	25873.9	32534.4				146	2227904	349888	1733312	2259456		44558.1	6997.76	34666.2	45189.1				146	2763264	433584	2309504	2876352		55265.3	8671.68	46190.1	57527
	147	1052832	153372	821856	1035520		21056.6	3067.44	16437.1	20710.4				147	1528992	241704	1347616	1695776		30579.8	4834.08	26952.3	33915.5				147	2190592	337632	1774560	2271744		43811.8	6752.64	35491.2	45434.9				147	2758720	445776	2206720	2887168		55174.4	8915.52	44134.4	57743.4
	148	1002640	154840	830432	1041088		20052.8	3096.8	16608.6	20821.8				148	1593824	238460	1308384	1648992		31876.5	4769.2	26167.7	32979.8				148	2182016	331888	1770400	2316928		43640.3	6637.76	35408	46338.6				148	2720064	439400	2305920	2864896		54401.3	8788	46118.4	57297.9
	149	1016240	160444	833440	1095712		20324.8	3208.88	16668.8	21914.2				149	1559712	260304	1263456	1639200		31194.2	5206.08	25269.1	32784				149	2155008	340480	1684544	2210944		43100.2	6809.6	33690.9	44218.9				149	2871040	441696	2228928	2741568		57420.8	8833.92	44578.6	54831.4
	150	1050848	162516	822416	1016608		21017	3250.32	16448.3	20332.2				150	1632576	250824	1293472	1704800		32651.5	5016.48	25869.4	34096				150	2119936	328528	1740576	2277696		42398.7	6570.56	34811.5	45553.9				150	2869184	428688	2260480	2883520		57383.7	8573.76	45209.6	57670.4
	151	981408	155848	814496	1037504		19628.2	3116.96	16289.9	20750.1				151	1583808	239728	1298752	1631584		31676.2	4794.56	25975	32631.7				151	2249536	338544	1659040	2259904		44990.7	6770.88	33180.8	45198.1				151	2766528	441032	2264960	2858368		55330.6	8820.64	45299.2	57167.4
	152	1016128	153880	821376	1023120		20322.6	3077.6	16427.5	20462.4				152	1629024	251380	1291104	1574208		32580.5	5027.6	25822.1	31484.2				152	2159424	335088	1741376	2222336		43188.5	6701.76	34827.5	44446.7				152	2756928	447616	2235200	2885952		55138.6	8952.32	44704	57719
	153	1024624	166912	826768	1052672		20492.5	3338.24	16535.4	21053.4				153	1568000	250772	1294944	1659648		31360	5015.44	25898.9	33193				153	2093536	323192	1739296	2215360		41870.7	6463.84	34785.9	44307.2				153	2801152	445520	2316288	2855680		56023	8910.4	46325.8	57113.6
	154	988496	159636	831472	1078112		19769.9	3192.72	16629.4	21562.2				154	1582240	238612	1303264	1591904		31644.8	4772.24	26065.3	31838.1				154	2263616	334376	1792704	2209600		45272.3	6687.52	35854.1	44192				154	2816832	428536	2189440	2863424		56336.6	8570.72	43788.8	57268.5
	155	1013680	161556	804320	1025568		20273.6	3231.12	16086.4	20511.4				155	1591840	251076	1305536	1624864		31836.8	5021.52	26110.7	32497.3				155	2193792	344752	1726112	2245632		43875.8	6895.04	34522.2	44912.6				155	2721152	434504	2214144	2895296		54423	8690.08	44282.9	57905.9
	156	1018368	170452	833184	1036656		20367.4	3409.04	16663.7	20733.1				156	1625184	246416	1234144	1645152		32503.7	4928.32	24682.9	32903				156	2165952	340528	1705856	2189440		43319	6810.56	34117.1	43788.8				156	2788928	448280	2241792	2949632		55778.6	8965.6	44835.8	58992.6
	157	987552	156000	876208	1072320		19751	3120	17524.2	21446.4				157	1539424	246568	1269440	1676576		30788.5	4931.36	25388.8	33531.5				157	2170624	343120	1762272	2259776		43412.5	6862.4	35245.4	45195.5				157	2843712	441136	2274944	2915456		56874.2	8822.72	45498.9	58309.1
	158	1028432	151608	830016	1058048		20568.6	3032.16	16600.3	21161				158	1572224	248544	1279904	1630944		31444.5	4970.88	25598.1	32618.9				158	2177216	348056	1825856	2214080		43544.3	6961.12	36517.1	44281.6				158	2790720	420680	2269184	2848960		55814.4	8413.6	45383.7	56979.2
	159	991152	151404	811760	1040000		19823	3028.08	16235.2	20800				159	1610464	251280	1303424	1655904		32209.3	5025.6	26068.5	33118.1				159	2162176	337880	1731712	2251520		43243.5	6757.6	34634.2	45030.4				159	2777472	440472	2222272	2844800		55549.4	8809.44	44445.4	56896
	160	1003280	155192	860672	1052352		20065.6	3103.84	17213.4	21047				160	1602112	257820	1264448	1644448		32042.2	5156.4	25289	32889				160	2190144	343016	1723712	2195648		43802.9	6860.32	34474.2	43913				160	2792448	431288	2276480	2880000		55849	8625.76	45529.6	57600
	161	1010144	157264	848080	1071552		20202.9	3145.28	16961.6	21431				161	1571136	253056	1287072	1578144		31422.7	5061.12	25741.4	31562.9				161	2176320	333864	1839968	2283264		43526.4	6677.28	36799.4	45665.3				161	2847616	434960	2289344	2881920		56952.3	8699.2	45786.9	57638.4
	162	985584	160296	826816	1044176		19711.7	3205.92	16536.3	20883.5				162	1545856	238968	1312672	1635104		30917.1	4779.36	26253.4	32702.1				162	2126400	319840	1754144	2218176		42528	6396.8	35082.9	44363.5				162	2838848	431080	2318528	2877504		56777	8621.6	46370.6	57550.1
	163	990256	149536	847104	1073472		19805.1	2990.72	16942.1	21469.4				163	1603712	252700	1284608	1610976		32074.2	5054	25692.2	32219.5				163	2176448	323800	1765216	2183104		43529	6476	35304.3	43662.1				163	2691584	424456	2335040	2905856		53831.7	8489.12	46700.8	58117.1
	164	1013216	158676	816368	1023840		20264.3	3173.52	16327.4	20476.8				164	1628128	254472	1321152	1693376		32562.6	5089.44	26423	33867.5				164	2131392	329800	1795136	2290752		42627.8	6596	35902.7	45815				164	2762240	433120	2232064	2902912		55244.8	8662.4	44641.3	58058.2
	165	1002176	159636	846592	1025504		20043.5	3192.72	16931.8	20510.1				165	1601824	259544	1280288	1630240		32036.5	5190.88	25605.8	32604.8				165	2196608	340728	1755488	2204672		43932.2	6814.56	35109.8	44093.4				165	2743552	429040	2255232	2848512		54871	8580.8	45104.6	56970.2
	166	997856	149284	792320	1024880		19957.1	2985.68	15846.4	20497.6				166	1587488	246160	1285856	1592640		31749.8	4923.2	25717.1	31852.8				166	2226240	355688	1720160	2198400		44524.8	7113.76	34403.2	43968				166	2799616	434096	2245632	2878080		55992.3	8681.92	44912.6	57561.6
	167	1068000	156760	852432	1036928		21360	3135.2	17048.6	20738.6				167	1612672	250620	1300832	1598208		32253.4	5012.4	26016.6	31964.2				167	2191808	331784	1796736	2218944		43836.2	6635.68	35934.7	44378.9				167	2768192	429296	2262912	2889984		55363.8	8585.92	45258.2	57799.7
	168	1007696	158424	842336	1038384		20153.9	3168.48	16846.7	20767.7				168	1582496	239220	1280128	1649728		31649.9	4784.4	25602.6	32994.6				168	2228928	328784	1678464	2224896		44578.6	6575.68	33569.3	44497.9				168	2822976	423840	2251200	2928320		56459.5	8476.8	45024	58566.4
	169	1023376	157060	786752	1074688		20467.5	3141.2	15735	21493.8				169	1556192	249508	1283136	1615680		31123.8	4990.16	25662.7	32313.6				169	2145280	323704	1710240	2190912		42905.6	6474.08	34204.8	43818.2				169	2832768	438176	2281536	2902144		56655.4	8763.52	45630.7	58042.9
	170	1004736	164436	839024	1052544		20094.7	3288.72	16780.5	21050.9				170	1569632	243224	1288384	1637696		31392.6	4864.48	25767.7	32753.9				170	2148928	312424	1763072	2350976		42978.6	6248.48	35261.4	47019.5				170	2806464	443128	2207616	2855616		56129.3	8862.56	44152.3	57112.3
	171	1036976	164284	840224	1091968		20739.5	3285.68	16804.5	21839.4				171	1551488	245756	1302528	1654432		31029.8	4915.12	26050.6	33088.6				171	2144640	334680	1712384	2198272		42892.8	6693.6	34247.7	43965.4				171	2797824	432712	2321728	2830336		55956.5	8654.24	46434.6	56606.7
	172	1008432	150444	828464	1027120		20168.6	3008.88	16569.3	20542.4				172	1596096	241044	1257568	1603552		31921.9	4820.88	25151.4	32071				172	2192000	334680	1728384	2263104		43840	6693.6	34567.7	45262.1				172	2731264	411856	2214272	2882880		54625.3	8237.12	44285.4	57657.6
	173	1035616	163780	834576	1047872		20712.3	3275.6	16691.5	20957.4				173	1621664	238156	1284608	1686656		32433.3	4763.12	25692.2	33733.1				173	2148864	350800	1775648	2243008		42977.3	7016	35513	44860.2				173	2728640	432664	2219776	2807680		54572.8	8653.28	44395.5	56153.6
	174	985840	155596	826864	1045424		19716.8	3111.92	16537.3	20908.5				174	1570816	248288	1312096	1684384		31416.3	4965.76	26241.9	33687.7				174	2229824	339056	1741472	2201984		44596.5	6781.12	34829.4	44039.7				174	2818944	439248	2242944	2955840		56378.9	8784.96	44858.9	59116.8
	175	1012016	161356	824176	1043760		20240.3	3227.12	16483.5	20875.2				175	1589344	255032	1294528	1684256		31786.9	5100.64	25890.6	33685.1				175	2203008	336408	1774368	2273408		44060.2	6728.16	35487.4	45468.2				175	2806336	436232	2329728	2950592		56126.7	8724.64	46594.6	59011.8
	176	1008432	162620	817760	1050784		20168.6	3252.4	16355.2	21015.7				176	1613120	240892	1261472	1693504		32262.4	4817.84	25229.4	33870.1				176	2067008	315416	1754848	2199616		41340.2	6308.32	35097	43992.3				176	2756736	424760	2214912	2787264		55134.7	8495.2	44298.2	55745.3
	177	996512	160040	840064	1073792		19930.2	3200.8	16801.3	21475.8				177	1567232	247528	1292960	1672480		31344.6	4950.56	25859.2	33449.6				177	2154816	329136	1780672	2207744		43096.3	6582.72	35613.4	44154.9				177	2716800	433120	2211712	2876032		54336	8662.4	44234.2	57520.6
	178	1049120	151052	798016	1039168		20982.4	3021.04	15960.3	20783.4				178	1580000	247732	1271552	1656448		31600	4954.64	25431	33129				178	2174528	328272	1773504	2201920		43490.6	6565.44	35470.1	44038.4				178	2743488	441800	2303680	2902208		54869.8	8836	46073.6	58044.2
	179	992288	158476	820192	1023328		19845.8	3169.52	16403.8	20466.6				179	1529984	247528	1283584	1616608		30599.7	4950.56	25671.7	32332.2				179	2188800	323192	1713088	2208448		43776	6463.84	34261.8	44169				179	2882176	452520	2237376	2807104		57643.5	9050.4	44747.5	56142.1
	180	984688	143272	795888	1060576		19693.8	2865.44	15917.8	21211.5				180	1579776	244744	1322016	1604352		31595.5	4894.88	26440.3	32087				180	2155776	335904	1797632	2228160		43115.5	6718.08	35952.6	44563.2				180	2728832	413080	2256640	2885696		54576.6	8261.6	45132.8	57713.9
	181	1024464	164840	766496	1002640		20489.3	3296.8	15329.9	20052.8				181	1550208	248896	1299904	1660640		31004.2	4977.92	25998.1	33212.8				181	2201152	338240	1756832	2197952		44023	6764.8	35136.6	43959				181	2856000	416952	2232896	2954816		57120	8339.04	44657.9	59096.3
	182	1018112	157416	834672	1076288		20362.2	3148.32	16693.4	21525.8				182	1594304	244488	1288416	1583776		31886.1	4889.76	25768.3	31675.5				182	2133952	311504	1739712	2161024		42679	6230.08	34794.2	43220.5				182	2780352	435928	2270656	2887872		55607	8718.56	45413.1	57757.4
	183	993584	151656	821904	1075840		19871.7	3033.12	16438.1	21516.8				183	1528448	254220	1315008	1684256		30569	5084.4	26300.2	33685.1				183	2180800	340632	1776864	2217408		43616	6812.64	35537.3	44348.2				183	2780864	432968	2242304	2894720		55617.3	8659.36	44846.1	57894.4
	184	1033648	162720	801168	1013840		20673	3254.4	16023.4	20276.8				184	1575520	232584	1278752	1660160		31510.4	4651.68	25575	33203.2				184	2145984	337880	1806304	2273984		42919.7	6757.6	36126.1	45479.7				184	2824960	429656	2149184	2840768		56499.2	8593.12	42983.7	56815.4
	185	1024528	164436	828736	1063712		20490.6	3288.72	16574.7	21274.2				185	1589408	255692	1248768	1591264		31788.2	5113.84	24975.4	31825.3				185	2162752	338952	1785344	2242304		43255	6779.04	35706.9	44846.1				185	2747264	430576	2302336	2850816		54945.3	8611.52	46046.7	57016.3
	186	990784	151352	811408	1022752		19815.7	3027.04	16228.2	20455				186	1582336	246920	1292576	1665888		31646.7	4938.4	25851.5	33317.8				186	2086464	340016	1756032	2251200		41729.3	6800.32	35120.6	45024				186	2769600	431288	2236160	2967488		55392	8625.76	44723.2	59349.8
	187	1039952	158728	804160	1070336		20799	3174.56	16083.2	21406.7				187	1609120	248796	1272192	1648352		32182.4	4975.92	25443.8	32967				187	2070176	327664	1726944	2293760		41403.5	6553.28	34538.9	45875.2				187	2845376	437920	2242944	2935552		56907.5	8758.4	44858.9	58711
	188	1015664	156100	851968	1065856		20313.3	3122	17039.4	21317.1				188	1589120	246516	1303488	1618368		31782.4	4930.32	26069.8	32367.4				188	2215296	330104	1742496	2191680		44305.9	6602.08	34849.9	43833.6				188	2818432	447664	2297344	2857728		56368.6	8953.28	45946.9	57154.6
	189	1028528	162012	790256	1089824		20570.6	3240.24	15805.1	21796.5				189	1548032	241196	1283712	1621792		30960.6	4823.92	25674.2	32435.8				189	2191680	333616	1758784	2234176		43833.6	6672.32	35175.7	44683.5				189	2740864	424296	2243456	2905664		54817.3	8485.92	44869.1	58113.3
	190	1028432	159536	796512	1045168		20568.6	3190.72	15930.2	20903.4				190	1624448	242768	1288128	1654784		32489	4855.36	25762.6	33095.7				190	2243904	351408	1712800	2268096		44878.1	7028.16	34256	45361.9				190	2716864	422664	2241984	2899776		54337.3	8453.28	44839.7	57995.5
	191	974656	157212	807776	1036768		19493.1	3144.24	16155.5	20735.4				191	1610496	255032	1280128	1618688		32209.9	5100.64	25602.6	32373.8				191	2196800	337016	1747840	2252800		43936	6740.32	34956.8	45056				191	2811008	439656	2272640	2956544		56220.2	8793.12	45452.8	59130.9
	192	1015824	162972	810160	1053184		20316.5	3259.44	16203.2	21063.7				192	1544576	241348	1316064	1635936		30891.5	4826.96	26321.3	32718.7				192	2163840	346328	1800256	2345728		43276.8	6926.56	36005.1	46914.6				192	2698496	421696	2275968	2888704		53969.9	8433.92	45519.4	57774.1
	193	1006240	155900	817664	1011440		20124.8	3118	16353.3	20228.8				193	1587232	238764	1274016	1616896		31744.6	4775.28	25480.3	32337.9				193	2175488	347136	1756448	2312960		43509.8	6942.72	35129	46259.2				193	2841792	447976	2211584	2860736		56835.8	8959.52	44231.7	57214.7
	194	1033328	156960	858496	1040880		20666.6	3139.2	17169.9	20817.6				194	1567872	249456	1287840	1589600		31357.4	4989.12	25756.8	31792				194	2088032	338496	1760896	2274688		41760.6	6769.92	35217.9	45493.8				194	2796352	434704	2309248	2860224		55927	8694.08	46185	57204.5
	195	1031712	157820	807680	1027440		20634.2	3156.4	16153.6	20548.8				195	1580800	251736	1335264	1724512		31616	5034.72	26705.3	34490.2				195	2215104	332600	1766752	2280448		44302.1	6652	35335	45609				195	2753408	428840	2163136	2998144		55068.2	8576.8	43262.7	59962.9
	196	1066592	165800	823712	1039056		21331.8	3316	16474.2	20781.1				196	1593024	249556	1286688	1652128		31860.5	4991.12	25733.8	33042.6				196	2119680	332952	1742272	2248576		42393.6	6659.04	34845.4	44971.5				196	2835008	454816	2250048	2835648		56700.2	9096.32	45001	56713
	197	984688	161304	837888	1085376		19693.8	3226.08	16757.8	21707.5				197	1605280	240688	1316064	1661120		32105.6	4813.76	26321.3	33222.4				197	2078336	331328	1755808	2240640		41566.7	6626.56	35116.2	44812.8				197	2851200	433688	2287616	2841344		57024	8673.76	45752.3	56826.9
	198	1008224	151100	838672	1048496		20164.5	3022	16773.4	20969.9				198	1595392	248240	1268096	1667200		31907.8	4964.8	25361.9	33344				198	2171584	332752	1696384	2230912		43431.7	6655.04	33927.7	44618.2				198	2799552	423280	2254016	2949248		55991	8465.6	45080.3	58985
	199	1037232	155192	814976	1027328		20744.6	3103.84	16299.5	20546.6				199	1617568	241956	1271136	1640960		32351.4	4839.12	25422.7	32819.2				199	2141568	337632	1711296	2255680		42831.4	6752.64	34225.9	45113.6				199	2841216	436232	2220480	2856000		56824.3	8724.64	44409.6	57120
	200	987968	153880	824432	1071072		19759.4	3077.6	16488.6	21421.4				200	1579104	244944	1312800	1629600		31582.1	4898.88	26256	32592				200	2134976	332648	1779968	2232832		42699.5	6652.96	35599.4	44656.6				200	2718208	430368	2224576	2866496		54364.2	8607.36	44491.5	57329.9
	201	1001552	162668	794128	1064672		20031	3253.36	15882.6	21293.4				201	1550880	246972	1335424	1674880		31017.6	4939.44	26708.5	33497.6				201	2181504	338192	1683200	2273024		43630.1	6763.84	33664	45460.5				201	2660736	423640	2210176	2893120		53214.7	8472.8	44203.5	57862.4
	202	1054688	158172	863360	1016608		21093.8	3163.44	17267.2	20332.2				202	1622848	241348	1294688	1608704		32457	4826.96	25893.8	32174.1				202	2194304	322736	1744800	2229824		43886.1	6454.72	34896	44596.5				202	2784768	438432	2226944	2820736		55695.4	8768.64	44538.9	56414.7
	203	999792	146152	826656	1080064		19995.8	2923.04	16533.1	21601.3				203	1599072	238764	1311616	1624288		31981.4	4775.28	26232.3	32485.8				203	2218240	341288	1769696	2265664		44364.8	6825.76	35393.9	45313.3				203	2888320	428944	2362304	2861376		57766.4	8578.88	47246.1	57227.5
	204	1054272	161660	814976	1043024		21085.4	3233.2	16299.5	20860.5				204	1600992	241752	1292160	1698336		32019.8	4835.04	25843.2	33966.7				204	2137280	333816	1799712	2251264		42745.6	6676.32	35994.2	45025.3				204	2805760	424048	2187264	2873088		56115.2	8480.96	43745.3	57461.8
	205	1029728	157820	825152	1068768		20594.6	3156.4	16503	21375.4				205	1641888	239880	1277120	1638272		32837.8	4797.6	25542.4	32765.4				205	2080768	339664	1791168	2250560		41615.4	6793.28	35823.4	45011.2				205	2786496	434856	2345600	2751360		55729.9	8697.12	46912	55027.2
	206	983344	155292	802352	1072032		19666.9	3105.84	16047	21440.6				206	1571776	247528	1328896	1620992		31435.5	4950.56	26577.9	32419.8				206	2099648	343576	1738496	2292480		41993	6871.52	34769.9	45849.6				206	2731776	431800	2248704	3017280		54635.5	8636	44974.1	60345.6
	207	1040624	149636	822000	985216		20812.5	2992.72	16440	19704.3				207	1569216	253004	1290784	1689824		31384.3	5060.08	25815.7	33796.5				207	2237184	330560	1757824	2269440		44743.7	6611.2	35156.5	45388.8				207	2926592	421696	2192128	2791360		58531.8	8433.92	43842.6	55827.2
	208	999568	164284	842752	1036864		19991.4	3285.68	16855	20737.3				208	1633440	246568	1284704	1615232		32668.8	4931.36	25694.1	32304.6				208	2205696	337936	1814880	2258560		44113.9	6758.72	36297.6	45171.2				208	2917760	441952	2254976	2794624		58355.2	8839.04	45099.5	55892.5
	209	994944	153476	811760	1076544		19898.9	3069.52	16235.2	21530.9				209	1551840	251432	1304576	1647136		31036.8	5028.64	26091.5	32942.7				209	2159424	338648	1731008	2331904		43188.5	6772.96	34620.2	46638.1				209	2695360	424096	2323840	2919104		53907.2	8481.92	46476.8	58382.1
	210	1030512	160800	804832	1013792		20610.2	3216	16096.6	20275.8				210	1616192	244844	1302144	1654272		32323.8	4896.88	26042.9	33085.4				210	2154944	330208	1735936	2172672		43098.9	6604.16	34718.7	43453.4				210	2777664	436744	2216256	2792704		55553.3	8734.88	44325.1	55854.1
	211	988496	160748	840992	1049696		19769.9	3214.96	16819.8	20993.9				211	1623712	244032	1326784	1643328		32474.2	4880.64	26535.7	32866.6				211	2114688	338592	1747200	2196160		42293.8	6771.84	34944	43923.2				211	2799232	435672	2296448	2809536		55984.6	8713.44	45929	56190.7
	212	997392	159232	836800	1062624		19947.8	3184.64	16736	21252.5				212	1563808	248744	1310304	1664608		31276.2	4974.88	26206.1	33292.2				212	2112576	320960	1744096	2273472		42251.5	6419.2	34881.9	45469.4				212	2640832	436896	2242240	2891840		52816.6	8737.92	44844.8	57836.8
	213	1024576	163680	801632	1024576		20491.5	3273.6	16032.6	20491.5				213	1600192	253360	1263040	1670784		32003.8	5067.2	25260.8	33415.7				213	2169536	339712	1729024	2276352		43390.7	6794.24	34580.5	45527				213	2783104	428432	2187264	2953856		55662.1	8568.64	43745.3	59077.1
	214	1000144	156608	793264	1054368		20002.9	3132.16	15865.3	21087.4				214	1612576	255740	1275776	1673216		32251.5	5114.8	25515.5	33464.3				214	2113216	339920	1722688	2178176		42264.3	6798.4	34453.8	43563.5				214	2863616	430216	2241856	2814976		57272.3	8604.32	44837.1	56299.5
	215	1027184	152968	818944	1050720		20543.7	3059.36	16378.9	21014.4				215	1600256	241552	1312896	1631680		32005.1	4831.04	26257.9	32633.6				215	2208640	328328	1755328	2251648		44172.8	6566.56	35106.6	45033				215	2749184	438480	2233920	2954432		54983.7	8769.6	44678.4	59088.6
	216	1024528	157768	808400	1038384		20490.6	3155.36	16168	20767.7				216	1582080	239980	1253600	1634400		31641.6	4799.6	25072	32688				216	2146560	341848	1764416	2209920		42931.2	6836.96	35288.3	44198.4				216	2834944	448432	2194176	2899264		56698.9	8968.64	43883.5	57985.3
	217	996560	156152	860976	1059872		19931.2	3123.04	17219.5	21197.4				217	1617376	247832	1289696	1676640		32347.5	4956.64	25793.9	33532.8				217	2079328	326144	1752768	2269056		41586.6	6522.88	35055.4	45381.1				217	2809984	436392	2268608	2845568		56199.7	8727.84	45372.2	56911.4
	218	1019888	157616	824224	1056160		20397.8	3152.32	16484.5	21123.2				218	1489344	243728	1300672	1712160		29786.9	4874.56	26013.4	34243.2				218	2133696	338344	1741312	2250624		42673.9	6766.88	34826.2	45012.5				218	2699264	423024	2315456	2940736		53985.3	8460.48	46309.1	58814.7
	219	1024736	159992	825216	998432		20494.7	3199.84	16504.3	19968.6				219	1584128	242768	1242048	1654624		31682.6	4855.36	24841	33092.5				219	2180416	345816	1721920	2176256		43608.3	6916.32	34438.4	43525.1				219	2909504	431648	2207040	2799040		58190.1	8632.96	44140.8	55980.8
	220	993024	162772	817040	1072064		19860.5	3255.44	16340.8	21441.3				220	1590048	250064	1290272	1647168		31801	5001.28	25805.4	32943.4				220	2187584	342712	1792352	2247424		43751.7	6854.24	35847	44948.5				220	2831552	443432	2250432	2848640		56631	8868.64	45008.6	56972.8
	221	1003536	155648	811664	1048544		20070.7	3112.96	16233.3	20970.9				221	1572672	248440	1271808	1633984		31453.4	4968.8	25436.2	32679.7				221	2152576	334120	1790880	2199424		43051.5	6682.4	35817.6	43988.5				221	2715136	410936	2321856	2952704		54302.7	8218.72	46437.1	59054.1
	222	1010608	160192	834000	1040000		20212.2	3203.84	16680	20800				222	1601984	244184	1284128	1646336		32039.7	4883.68	25682.6	32926.7				222	2172416	350848	1753440	2222848		43448.3	7016.96	35068.8	44457				222	2918912	439192	2227136	2799424		58378.2	8783.84	44542.7	55988.5
	223	965760	157868	841312	1063264		19315.2	3157.36	16826.2	21265.3				223	1589664	254576	1284704	1672640		31793.3	5091.52	25694.1	33452.8				223	2139136	333256	1789408	2225920		42782.7	6665.12	35788.2	44518.4				223	2780928	440424	2324544	2974208		55618.6	8808.48	46490.9	59484.2
	224	1003840	151404	816928	1062144		20076.8	3028.08	16338.6	21242.9				224	1582496	246364	1295680	1702240		31649.9	4927.28	25913.6	34044.8				224	2177728	329136	1761856	2219712		43554.6	6582.72	35237.1	44394.2				224	2753024	430320	2267072	2903232		55060.5	8606.4	45341.4	58064.6
	225	1011968	159536	821744	1029632		20239.4	3190.72	16434.9	20592.6				225	1663808	252140	1236096	1616448		33276.2	5042.8	24721.9	32329				225	2264320	340072	1722624	2193344		45286.4	6801.44	34452.5	43866.9				225	2860288	438536	2285184	2864832		57205.8	8770.72	45703.7	57296.6
	226	1023632	156304	839280	1074304		20472.6	3126.08	16785.6	21486.1				226	1537728	255944	1301280	1630304		30754.6	5118.88	26025.6	32606.1				226	2091648	345712	1791104	2273472		41833	6914.24	35822.1	45469.4				226	2794368	440368	2267904	2999040		55887.4	8807.36	45358.1	59980.8
	227	1017600	168684	832400	1003120		20352	3373.68	16648	20062.4				227	1589824	245552	1299040	1716800		31796.5	4911.04	25980.8	34336				227	2253376	330056	1750944	2262080		45067.5	6601.12	35018.9	45241.6				227	2704896	431136	2231360	2891008		54097.9	8622.72	44627.2	57820.2
	228	1041984	162264	795216	1053856		20839.7	3245.28	15904.3	21077.1				228	1635456	254880	1266624	1599872		32709.1	5097.6	25332.5	31997.4				228	2212032	344648	1751424	2231936		44240.6	6892.96	35028.5	44638.7				228	2884864	447664	2274176	2822400		57697.3	8953.28	45483.5	56448
	229	976736	157972	847360	1054432		19534.7	3159.44	16947.2	21088.6				229	1625824	252496	1302592	1677056		32516.5	5049.92	26051.8	33541.1				229	2164224	330512	1805504	2254592		43284.5	6610.24	36110.1	45091.8				229	2720832	439144	2328384	2957888		54416.6	8782.88	46567.7	59157.8
	230	1005568	159992	805088	1044688		20111.4	3199.84	16101.8	20893.8				230	1516192	234356	1299520	1710816		30323.8	4687.12	25990.4	34216.3				230	2081600	319736	1723008	2276032		41632	6394.72	34460.2	45520.6				230	2752576	422104	2153088	2850560		55051.5	8442.08	43061.8	57011.2
	231	1041824	155444	826864	1060576		20836.5	3108.88	16537.3	21211.5				231	1623168	261116	1281696	1587328		32463.4	5222.32	25633.9	31746.6				231	2212864	336560	1790720	2173824		44257.3	6731.2	35814.4	43476.5				231	2851008	429704	2274560	2873088		57020.2	8594.08	45491.2	57461.8
	232	996928	157264	802400	1068416		19938.6	3145.28	16048	21368.3				232	1524320	254828	1276288	1654048		30486.4	5096.56	25525.8	33081				232	2115520	323296	1781696	2265344		42310.4	6465.92	35633.9	45306.9				232	2752256	444400	2294720	2947520		55045.1	8888	45894.4	58950.4
	233	1051872	161960	796352	1040832		21037.4	3239.2	15927	20816.6				233	1538144	248088	1288960	1657248		30762.9	4961.76	25779.2	33145				233	2197696	336256	1711296	2229312		43953.9	6725.12	34225.9	44586.2				233	2736512	431744	2247360	2961152		54730.2	8634.88	44947.2	59223
	234	1012848	158324	841104	1041568		20257	3166.48	16822.1	20831.4				234	1579776	246720	1303168	1597440		31595.5	4934.4	26063.4	31948.8				234	2170048	339768	1786816	2190336		43401	6795.36	35736.3	43806.7				234	2788352	417008	2130944	2760960		55767	8340.16	42618.9	55219.2
	235	1001712	153980	809120	1052960		20034.2	3079.6	16182.4	21059.2				235	1622912	248036	1327072	1671104		32458.2	4960.72	26541.4	33422.1				235	2159744	339056	1753024	2412544		43194.9	6781.12	35060.5	48250.9				235	2722752	452928	2247680	2861760		54455	9058.56	44953.6	57235.2
	236	1040000	152060	795840	1037968		20800	3041.2	15916.8	20759.4				236	1595072	243832	1270496	1646432		31901.4	4876.64	25409.9	32928.6				236	2229760	337016	1723648	2229632		44595.2	6740.32	34473	44592.6				236	2743040	430984	2190592	2927424		54860.8	8619.68	43811.8	58548.5
	237	972112	164692	827536	1076096		19442.2	3293.84	16550.7	21521.9				237	1606048	249860	1291424	1584672		32121	4997.2	25828.5	31693.4				237	2121280	347288	1736576	2228864		42425.6	6945.76	34731.5	44577.3				237	2796800	429704	2211712	2754688		55936	8594.08	44234.2	55093.8
	238	981888	156404	789376	1026240		19637.8	3128.08	15787.5	20524.8				238	1541984	248240	1340736	1641792		30839.7	4964.8	26814.7	32835.8				238	2149824	325024	1780832	2283840		42996.5	6500.48	35616.6	45676.8				238	2721024	437464	2391040	2900544		54420.5	8749.28	47820.8	58010.9
	239	1055744	157768	815232	1016192		21114.9	3155.36	16304.6	20323.8				239	1589600	242512	1259040	1679456		31792	4850.24	25180.8	33589.1				239	2167744	334424	1724768	2154688		43354.9	6688.48	34495.4	43093.8				239	2827392	417416	2154240	2930432		56547.8	8348.32	43084.8	58608.6
	240	999264	150900	850048	1024464		19985.3	3018	17001	20489.3				240	1586144	235168	1296160	1615520		31722.9	4703.36	25923.2	32310.4				240	2181248	360216	1814624	2199936		43625	7204.32	36292.5	43998.7				240	2770624	453640	2232128	2713792		55412.5	9072.8	44642.6	54275.8
	241	987760	144636	823664	1051520		19755.2	2892.72	16473.3	21030.4				241	1569792	250064	1285184	1657984		31395.8	5001.28	25703.7	33159.7				241	2100544	327360	1721728	2283008		42010.9	6547.2	34434.6	45660.2				241	2731264	428128	2352128	2937344		54625.3	8562.56	47042.6	58746.9
	242	1048336	161404	832096	1059712		20966.7	3228.08	16641.9	21194.2				242	1564800	236992	1256384	1656288		31296	4739.84	25127.7	33125.8				242	2322880	331224	1758368	2264448		46457.6	6624.48	35167.4	45289				242	2815872	422664	2213056	2842496		56317.4	8453.28	44261.1	56849.9
	243	983072	159032	840016	1062880		19661.4	3180.64	16800.3	21257.6				243	1597952	260000	1297120	1574784		31959	5200	25942.4	31495.7				243	2235712	341592	1791008	2181824		44714.2	6831.84	35820.2	43636.5				243	2819968	438840	2315968	2906560		56399.4	8776.8	46319.4	58131.2
	244	1008160	150092	815440	1071296		20163.2	3001.84	16308.8	21425.9				244	1551904	239272	1290592	1671744		31038.1	4785.44	25811.8	33434.9				244	2137664	328784	1748576	2251840		42753.3	6575.68	34971.5	45036.8				244	2701632	445832	2253440	2965888		54032.6	8916.64	45068.8	59317.8
	245	1056768	157768	833488	1026560		21135.4	3155.36	16669.8	20531.2				245	1638880	255184	1260256	1619648		32777.6	5103.68	25205.1	32393				245	2168576	327008	1742880	2245376		43371.5	6540.16	34857.6	44907.5				245	2837504	431392	2224256	2800320		56750.1	8627.84	44485.1	56006.4
	246	995568	157972	856112	1078592		19911.4	3159.44	17122.2	21571.8				246	1607584	257108	1300000	1636896		32151.7	5142.16	26000	32737.9				246	2151488	334880	1805184	2263360		43029.8	6697.6	36103.7	45267.2				246	2779584	442968	2271488	2912000		55591.7	8859.36	45429.8	58240
	247	1016704	152060	808048	1093376		20334.1	3041.2	16161	21867.5				247	1538048	237092	1329216	1680736		30761	4741.84	26584.3	33614.7				247	2129664	331328	1743616	2252352		42593.3	6626.56	34872.3	45047				247	2686144	428584	2255680	2862592		53722.9	8571.68	45113.6	57251.8
	248	987808	155140	836336	1041360		19756.2	3102.8	16726.7	20827.2				248	1613920	249204	1223712	1602944		32278.4	4984.08	24474.2	32058.9				248	2276480	330560	1765632	2224256		45529.6	6611.2	35312.6	44485.1				248	2893632	420880	2174912	2794048		57872.6	8417.6	43498.2	55881
	249	982816	160852	844208	1032592		19656.3	3217.04	16884.2	20651.8				249	1553120	252496	1295840	1659648		31062.4	5049.92	25916.8	33193				249	2104320	345768	1761376	2295296		42086.4	6915.36	35227.5	45905.9				249	2705152	454152	2277376	2953280		54103	9083.04	45547.5	59065.6
	250	985472	154032	829552	1047136		19709.4	3080.64	16591	20942.7				250	1522624	248644	1257536	1674944		30452.5	4972.88	25150.7	33498.9				250	2128896	334072	1748416	2312512		42577.9	6681.44	34968.3	46250.2				250	2727744	425168	2309696	2948416		54554.9	8503.36	46193.9	58968.3
	251	1055840	162164	830336	1024880		21116.8	3243.28	16606.7	20497.6				251	1623072	252648	1310944	1642432		32461.4	5052.96	26218.9	32848.6				251	2134080	342056	1758432	2189056		42681.6	6841.12	35168.6	43781.1				251	2863872	428024	2263360	2762624		57277.4	8560.48	45267.2	55252.5
	252	992080	153928	831984	1056736		19841.6	3078.56	16639.7	21134.7				252	1586048	252396	1291424	1664384		31721	5047.92	25828.5	33287.7				252	2123776	340120	1819488	2293632		42475.5	6802.4	36389.8	45872.6				252	2783168	439504	2240448	2877504		55663.4	8790.08	44809	57550.1
	253	1021232	158172	814816	1053248		20424.6	3163.44	16296.3	21065				253	1559136	241248	1256736	1691040		31182.7	4824.96	25134.7	33820.8				253	2181632	320808	1726784	2306496		43632.6	6416.16	34535.7	46129.9				253	2763136	430168	2216320	2847744		55262.7	8603.36	44326.4	56954.9
	254	1052288	166256	831776	1026912		21045.8	3325.12	16635.5	20538.2				254	1600768	248744	1246560	1623744		32015.4	4974.88	24931.2	32474.9				254	2207040	344240	1744800	2214528		44140.8	6884.8	34896	44290.6				254	2881920	417464	2233984	2828672		57638.4	8349.28	44679.7	56573.4
	255	1001344	158272	854144	1102080		20026.9	3165.44	17082.9	22041.6				255	1603072	245248	1286496	1636640		32061.4	4904.96	25729.9	32732.8				255	2099904	335544	1784320	2360128		41998.1	6710.88	35686.4	47202.6				255	2738816	446032	2328896	2899968		54776.3	8920.64	46577.9	57999.4
	256	1023120	153728	811920	1017280		20462.4	3074.56	16238.4	20345.6				256	1551680	244996	1272608	1643168		31033.6	4899.92	25452.2	32863.4				256	2115904	329088	1736928	2233600		42318.1	6581.76	34738.6	44672				256	2733440	410536	2117632	2877376		54668.8	8210.72	42352.6	57547.5
	257	1004672	156760	823344	1041824		20093.4	3135.2	16466.9	20836.5				257	1593280	250368	1311424	1616256		31865.6	5007.36	26228.5	32325.1				257	2146432	341240	1817600	2134784		42928.6	6824.8	36352	42695.7				257	2832896	450424	2279168	2824960		56657.9	9008.48	45583.4	56499.2
	258	1001664	160040	824800	1072576		20033.3	3200.8	16496	21451.5				258	1611616	241448	1295808	1621952		32232.3	4828.96	25916.2	32439				258	2176128	334528	1772608	2293120		43522.6	6690.56	35452.2	45862.4				258	2769152	440424	2334656	2929984		55383	8808.48	46693.1	58599.7
	259	1060160	154992	781424	1064192		21203.2	3099.84	15628.5	21283.8				259	1581280	237092	1283424	1668096		31625.6	4741.84	25668.5	33361.9				259	2097664	335752	1743296	2231296		41953.3	6715.04	34865.9	44625.9				259	2757120	427408	2188544	2944960		55142.4	8548.16	43770.9	58899.2
	260	1006400	163932	832656	1085120		20128	3278.64	16653.1	21702.4				260	1569792	249404	1291232	1626304		31395.8	4988.08	25824.6	32526.1				260	2221056	355128	1746016	2250368		44421.1	7102.56	34920.3	45007.4				260	2837056	441592	2250560	2820992		56741.1	8831.84	45011.2	56419.8
	261	1012544	154384	812800	1055072		20250.9	3087.68	16256	21101.4				261	1580416	246060	1311168	1635616		31608.3	4921.2	26223.4	32712.3				261	2098880	334576	1796512	2244800		41977.6	6691.52	35930.2	44896				261	2761472	439040	2336640	2868992		55229.4	8780.8	46732.8	57379.8
	262	1022432	148224	807264	1032080		20448.6	2964.48	16145.3	20641.6				262	1552000	243424	1273920	1684544		31040	4868.48	25478.4	33690.9				262	2219072	341592	1689216	2171264		44381.4	6831.84	33784.3	43425.3				262	2750976	432664	2177600	2922944		55019.5	8653.28	43552	58458.9
	263	1012960	160040	828880	1034944		20259.2	3200.8	16577.6	20698.9				263	1606368	241400	1272704	1558688		32127.4	4828	25454.1	31173.8				263	2230848	350648	1807104	2215808		44617	7012.96	36142.1	44316.2				263	2868672	447312	2241280	2829312		57373.4	8946.24	44825.6	56586.2
	264	1003216	157212	825152	1104928		20064.3	3144.24	16503	22098.6				264	1553344	254576	1343968	1661664		31066.9	5091.52	26879.4	33233.3				264	2069984	332192	1806272	2304320		41399.7	6643.84	36125.4	46086.4				264	2683136	420272	2293504	2933888		53662.7	8405.44	45870.1	58677.8
	265	1051008	156356	815328	1031184		21020.2	3127.12	16306.6	20623.7				265	1577440	232228	1253696	1666848		31548.8	4644.56	25073.9	33337				265	2107840	336304	1684800	2211008		42156.8	6726.08	33696	44220.2				265	2847808	433328	2192320	2824448		56956.2	8666.56	43846.4	56489
	266	1009104	162416	834832	1063936		20182.1	3248.32	16696.6	21278.7				266	1596896	247732	1263840	1665664		31937.9	4954.64	25276.8	33313.3				266	2220416	338800	1784416	2217088		44408.3	6776	35688.3	44341.8				266	2820544	436544	2242560	2867200		56410.9	8730.88	44851.2	57344
	267	997968	152616	803648	1079488		19959.4	3052.32	16073	21589.8				267	1599168	248288	1292736	1652768		31983.4	4965.76	25854.7	33055.4				267	2128256	331680	1765792	2370240		42565.1	6633.6	35315.8	47404.8				267	2638464	423888	2317184	2954368		52769.3	8477.76	46343.7	59087.4
	268	1019568	156760	830288	1051680		20391.4	3135.2	16605.8	21033.6				268	1621888	252852	1268192	1651264		32437.8	5057.04	25363.8	33025.3				268	2203776	330408	1695456	2218176		44075.5	6608.16	33909.1	44363.5				268	2776000	419456	2217152	2740992		55520	8389.12	44343	54819.8
	269	1015200	160144	827328	1027648		20304	3202.88	16546.6	20553				269	1617472	243832	1302368	1593760		32349.4	4876.64	26047.4	31875.2				269	2198784	365096	1770656	2272000		43975.7	7301.92	35413.1	45440				269	2811008	444760	2235456	2889664		56220.2	8895.2	44709.1	57793.3
	270	993280	162468	789376	1046048		19865.6	3249.36	15787.5	20921				270	1578016	251484	1331680	1620672		31560.3	5029.68	26633.6	32413.4				270	2162816	326544	1777984	2291904		43256.3	6530.88	35559.7	45838.1				270	2745984	423384	2316608	2896320		54919.7	8467.68	46332.2	57926.4
	271	1022848	155396	835824	1028064		20457	3107.92	16716.5	20561.3				271	1569152	250824	1287552	1667616		31383	5016.48	25751	33352.3				271	2177536	322280	1763296	2212800		43550.7	6445.6	35265.9	44256				271	2823424	416448	2209920	2735424		56468.5	8328.96	44198.4	54708.5
	272	986208	162668	861088	1059040		19724.2	3253.36	17221.8	21180.8				272	1581600	245604	1300320	1671520		31632	4912.08	26006.4	33430.4				272	2200896	335544	1746496	2253056		44017.9	6710.88	34929.9	45061.1				272	2845248	428688	2289792	2834432		56905	8573.76	45795.8	56688.6
	273	1012016	158828	807216	1029008		20240.3	3176.56	16144.3	20580.2				273	1565664	236028	1286496	1696640		31313.3	4720.56	25729.9	33932.8				273	2095712	322280	1810176	2302144		41914.2	6445.6	36203.5	46042.9				273	2809088	436184	2334656	2933632		56181.8	8723.68	46693.1	58672.6
	274	1045728	164336	835088	1040832		20914.6	3286.72	16701.8	20816.6				274	1607328	249356	1250656	1664608		32146.6	4987.12	25013.1	33292.2				274	2224256	334728	1765792	2161408		44485.1	6694.56	35315.8	43228.2				274	2817472	434656	2149824	2790400		56349.4	8693.12	42996.5	55808
	275	974400	159184	841248	1075200		19488	3183.68	16825	21504				275	1587168	258884	1268864	1668384		31743.4	5177.68	25377.3	33367.7				275	2096832	328888	1767200	2261184		41936.6	6577.76	35344	45223.7				275	2696192	441952	2305216	2861568		53923.8	8839.04	46104.3	57231.4
	276	1008480	153172	810832	1016864		20169.6	3063.44	16216.6	20337.3				276	1566720	242816	1267872	1682816		31334.4	4856.32	25357.4	33656.3				276	2145792	328832	1677184	2306752		42915.8	6576.64	33543.7	46135				276	2689792	437360	2313920	2879040		53795.8	8747.2	46278.4	57580.8
	277	1050016	158528	847056	1032032		21000.3	3170.56	16941.1	20640.6				277	1599232	238056	1311776	1619456		31984.6	4761.12	26235.5	32389.1				277	2228928	334680	1731936	2163776		44578.6	6693.6	34638.7	43275.5				277	2866176	433840	2187904	2780288		57323.5	8676.8	43758.1	55605.8
	278	992912	157312	831104	1069760		19858.2	3146.24	16622.1	21395.2				278	1593664	256148	1315680	1647776		31873.3	5122.96	26313.6	32955.5				278	2181696	339968	1810016	2194560		43633.9	6799.36	36200.3	43891.2				278	2777792	426848	2269120	2921856		55555.8	8536.96	45382.4	58437.1
	279	1006496	153728	812432	1047136		20129.9	3074.56	16248.6	20942.7				279	1573728	237952	1337920	1676544		31474.6	4759.04	26758.4	33530.9				279	2147968	325176	1726272	2232192		42959.4	6503.52	34525.4	44643.8				279	2695424	444704	2328832	2997504		53908.5	8894.08	46576.6	59950.1
	280	1025664	160144	838352	1023744		20513.3	3202.88	16767	20474.9				280	1566240	251332	1272928	1660224		31324.8	5026.64	25458.6	33204.5				280	2214848	351512	1762496	2273600		44297	7030.24	35249.9	45472				280	2808064	437360	2231488	2776128		56161.3	8747.2	44629.8	55522.6
	281	961440	150292	832352	1106784		19228.8	3005.84	16647	22135.7				281	1597696	244440	1295360	1624928		31953.9	4888.8	25907.2	32498.6				281	2166528	342056	1776544	2310080		43330.6	6841.12	35530.9	46201.6				281	2785472	432872	2337600	2875136		55709.4	8657.44	46752	57502.7
	282	1030768	161052	815440	1058048		20615.4	3221.04	16308.8	21161				282	1567520	231520	1260512	1660960		31350.4	4630.4	25210.2	33219.2				282	2151232	341592	1719648	2249152		43024.6	6831.84	34393	44983				282	2750912	441488	2241536	2938304		55018.2	8829.76	44830.7	58766.1
	283	1019152	160852	832928	1062848		20383	3217.04	16658.6	21257				283	1568832	245048	1302432	1571872		31376.6	4900.96	26048.6	31437.4				283	2168000	351056	1759456	2169792		43360	7021.12	35189.1	43395.8				283	2808896	444608	2187200	2829504		56177.9	8892.16	43744	56590.1
	284	992128	158424	821648	1045008		19842.6	3168.48	16433	20900.2				284	1671040	250468	1271616	1579040		33420.8	5009.36	25432.3	31580.8				284	2159872	341696	1766112	2309312		43197.4	6833.92	35322.2	46186.2				284	2744640	438784	2262016	2900608		54892.8	8775.68	45240.3	58012.2
	285	1008736	156860	821792	1015360		20174.7	3137.2	16435.8	20307.2				285	1566240	243224	1316320	1709120		31324.8	4864.48	26326.4	34182.4				285	2176064	321720	1723808	2267648		43521.3	6434.4	34476.2	45353				285	2656640	429248	2163840	2891008		53132.8	8584.96	43276.8	57820.2
	286	1022176	153020	865232	1055904		20443.5	3060.4	17304.6	21118.1				286	1620288	241144	1257376	1595840		32405.8	4822.88	25147.5	31916.8				286	2263808	347344	1756064	2217024		45276.2	6946.88	35121.3	44340.5				286	2841152	439552	2236224	2881792		56823	8791.04	44724.5	57635.8
	287	978608	153372	819008	1077504		19572.2	3067.44	16380.2	21550.1				287	1596512	243528	1305472	1713824		31930.2	4870.56	26109.4	34276.5				287	2100160	340328	1859040	2271232		42003.2	6806.56	37180.8	45424.6				287	2787008	432872	2252032	2987712		55740.2	8657.44	45040.6	59754.2
	288	1034208	154888	816160	1043072		20684.2	3097.76	16323.2	20861.4				288	1573024	248744	1263712	1671456		31460.5	4974.88	25274.2	33429.1				288	2199744	330000	1684704	2162752		43994.9	6600	33694.1	43255				288	2781504	450984	2177408	2917056		55630.1	9019.68	43548.2	58341.1
	289	1018112	158424	817200	1053696		20362.2	3168.48	16344	21073.9				289	1597472	253208	1270912	1590144		31949.4	5064.16	25418.2	31802.9				289	2226240	330560	1760896	2179584		44524.8	6611.2	35217.9	43591.7				289	2820480	457776	2309760	2787328		56409.6	9155.52	46195.2	55746.6
	290	994000	158576	800128	1070400		19880	3171.52	16002.6	21408				290	1600352	254372	1273088	1631840		32007	5087.44	25461.8	32636.8				290	2163584	325480	1809472	2326528		43271.7	6509.6	36189.4	46530.6				290	2654784	419760	2288000	2939840		53095.7	8395.2	45760	58796.8
	291	1001872	154384	833952	1051712		20037.4	3087.68	16679	21034.2				291	1575360	249608	1286912	1683104		31507.2	4992.16	25738.2	33662.1				291	2216448	327664	1697600	2155008		44329	6553.28	33952	43100.2				291	2846400	424504	2192000	2899712		56928	8490.08	43840	57994.2
	292	1013888	167872	831984	1070176		20277.8	3357.44	16639.7	21403.5				292	1636256	243728	1236096	1621952		32725.1	4874.56	24721.9	32439				292	2183168	337376	1788800	2220032		43663.4	6747.52	35776	44400.6				292	2856256	440520	2251328	2813312		57125.1	8810.4	45026.6	56266.2
	293	1031136	166104	831312	1036096		20622.7	3322.08	16626.2	20721.9				293	1595072	246312	1286336	1660064		31901.4	4926.24	25726.7	33201.3				293	2085600	330408	1781536	2201472		41712	6608.16	35630.7	44029.4				293	2695616	438480	2316096	2829440		53912.3	8769.6	46321.9	56588.8
	294	1017648	157364	827184	1018688		20353	3147.28	16543.7	20373.8				294	1583712	247124	1225440	1599552		31674.2	4942.48	24508.8	31991				294	2138560	343168	1706880	2138048		42771.2	6863.36	34137.6	42761				294	2796800	432360	2245376	2823360		55936	8647.2	44907.5	56467.2
	295	1020304	160748	836032	1061312		20406.1	3214.96	16720.6	21226.2				295	1571648	249708	1270144	1600288		31433	4994.16	25402.9	32005.8				295	2131136	343832	1802656	2240320		42622.7	6876.64	36053.1	44806.4				295	2814528	444656	2304896	2835264		56290.6	8893.12	46097.9	56705.3
	296	1023264	153120	806288	1012592		20465.3	3062.4	16125.8	20251.8				296	1572032	249964	1285792	1661600		31440.6	4999.28	25715.8	33232				296	2088128	324056	1760416	2278912		41762.6	6481.12	35208.3	45578.2				296	2676544	429248	2300992	3010176		53530.9	8584.96	46019.8	60203.5
	297	1020672	163276	844720	1065600		20413.4	3265.52	16894.4	21312				297	1547232	245656	1268864	1621184		30944.6	4913.12	25377.3	32423.7				297	2206848	338440	1709056	2198080		44137	6768.8	34181.1	43961.6				297	2809920	434600	2327680	2868864		56198.4	8692	46553.6	57377.3
	298	1021024	148272	824128	1077856		20420.5	2965.44	16482.6	21557.1				298	1605568	253256	1285920	1645888		32111.4	5065.12	25718.4	32917.8				298	2103040	348152	1799232	2220864		42060.8	6963.04	35984.6	44417.3				298	2842688	417672	2242304	2880896		56853.8	8353.44	44846.1	57617.9
	299	1030720	158576	811968	1033696		20614.4	3171.52	16239.4	20673.9				299	1578560	250924	1282656	1669280		31571.2	5018.48	25653.1	33385.6				299	2117312	339056	1787264	2246848		42346.2	6781.12	35745.3	44937				299	2807104	433632	2270528	2900672		56142.1	8672.64	45410.6	58013.4
	300	990256	154992	835200	1043696		19805.1	3099.84	16704	20873.9				300	1587232	240080	1300320	1660960		31744.6	4801.6	26006.4	33219.2				300	2221696	336864	1708704	2184384		44433.9	6737.28	34174.1	43687.7				300	2782784	423792	2274432	2891648		55655.7	8475.84	45488.6	57833
	301	1030672	153676	846848	1075040		20613.4	3073.52	16937	21500.8				301	1575808	258680	1271392	1606560		31516.2	5173.6	25427.8	32131.2				301	2233216	341744	1838144	2200512		44664.3	6834.88	36762.9	44010.2				301	2700736	450120	2351168	2881984		54014.7	9002.4	47023.4	57639.7
	302	1032960	157920	801216	1028592		20659.2	3158.4	16024.3	20571.8				302	1518688	234964	1283424	1628768		30373.8	4699.28	25668.5	32575.4				302	2182976	348968	1745120	2311296		43659.5	6979.36	34902.4	46225.9				302	2714560	424248	2252800	2898752		54291.2	8484.96	45056	57975
	303	1017600	158528	814304	1059712		20352	3170.56	16286.1	21194.2				303	1562624	249152	1274976	1623168		31252.5	4983.04	25499.5	32463.4				303	2197440	343632	1786080	2152576		43948.8	6872.64	35721.6	43051.5				303	2812544	404568	2198784	2853440		56250.9	8091.36	43975.7	57068.8
	304	1018064	160144	841360	1052416		20361.3	3202.88	16827.2	21048.3				304	1533376	250216	1324000	1640096		30667.5	5004.32	26480	32801.9				304	2087264	333920	1799392	2287680		41745.3	6678.4	35987.8	45753.6				304	2774720	441240	2264000	2875456		55494.4	8824.8	45280	57509.1
	305	1015824	157716	829808	1018640		20316.5	3154.32	16596.2	20372.8				305	1543744	253968	1260768	1618976		30874.9	5079.36	25215.4	32379.5				305	2208704	327616	1752704	2250240		44174.1	6552.32	35054.1	45004.8				305	2743424	423232	2244096	2907456		54868.5	8464.64	44881.9	58149.1
	306	1000624	154284	831264	1044320		20012.5	3085.68	16625.3	20886.4				306	1595776	244236	1302432	1632064		31915.5	4884.72	26048.6	32641.3				306	2206720	350344	1765696	2160000		44134.4	7006.88	35313.9	43200				306	2785472	437712	2125696	2827328		55709.4	8754.24	42513.9	56546.6
	307	1006080	157516	821328	1063136		20121.6	3150.32	16426.6	21262.7				307	1630464	242716	1277600	1640480		32609.3	4854.32	25552	32809.6				307	2174784	333816	1831264	2215680		43495.7	6676.32	36625.3	44313.6				307	2735360	441648	2292224	2904064		54707.2	8832.96	45844.5	58081.3
	308	988800	160444	826304	1083392		19776	3208.88	16526.1	21667.8				308	1595520	246872	1262848	1656704		31910.4	4937.44	25257	33134.1				308	2132160	327968	1693600	2198208		42643.2	6559.36	33872	43964.2				308	2793024	421192	2294656	2905344		55860.5	8423.84	45893.1	58106.9
	309	1005616	158628	810672	1018432		20112.3	3172.56	16213.4	20368.6				309	1604352	250620	1279008	1663008		32087	5012.4	25580.2	33260.2				309	2259456	349584	1772064	2170944		45189.1	6991.68	35441.3	43418.9				309	2883648	433432	2222080	2859008		57673	8668.64	44441.6	57180.2
	310	992080	158324	836176	1034064		19841.6	3166.48	16723.5	20681.3				310	1534496	242464	1321120	1633600		30689.9	4849.28	26422.4	32672				310	2080416	325480	1811936	2234496		41608.3	6509.6	36238.7	44689.9				310	2840384	434192	2286592	2874240		56807.7	8683.84	45731.8	57484.8
	311	1000512	158020	816992	1037024		20010.2	3160.4	16339.8	20740.5				311	1588032	239980	1279488	1666880		31760.6	4799.6	25589.8	33337.6				311	2155584	332800	1703904	2222848		43111.7	6656	34078.1	44457				311	2816320	399216	2228480	2858496		56326.4	7984.32	44569.6	57169.9
	312	1033952	156404	824800	1049120		20679	3128.08	16496	20982.4				312	1581056	251788	1270976	1666144		31621.1	5035.76	25419.5	33322.9				312	2199360	345304	1790688	2160768		43987.2	6906.08	35813.8	43215.4				312	2841600	441904	2176320	2845568		56832	8838.08	43526.4	56911.4
	313	1029424	159132	827440	1062560		20588.5	3182.64	16548.8	21251.2				313	1596640	248796	1294336	1629920		31932.8	4975.92	25886.7	32598.4				313	2059744	339256	1769760	2261056		41194.9	6785.12	35395.2	45221.1				313	2778624	426544	2318464	2990976		55572.5	8530.88	46369.3	59819.5
	314	1010352	155948	814304	1041824		20207	3118.96	16286.1	20836.5				314	1603232	245096	1217536	1665024		32064.6	4901.92	24350.7	33300.5				314	2144512	328984	1748576	2234624		42890.2	6579.68	34971.5	44692.5				314	2806592	431744	2225024	2909504		56131.8	8634.88	44500.5	58190.1
	315	1019264	158576	803184	1051296		20385.3	3171.52	16063.7	21025.9				315	1539168	242868	1307744	1642112		30783.4	4857.36	26154.9	32842.2				315	2200448	328584	1716864	2241216		44009	6571.68	34337.3	44824.3				315	2840448	458032	2247616	2842368		56809	9160.64	44952.3	56847.4
	316	1010928	157716	829344	1031248		20218.6	3154.32	16586.9	20625				316	1576960	247376	1219136	1644896		31539.2	4947.52	24382.7	32897.9				316	2063552	342768	1695424	2190656		41271	6855.36	33908.5	43813.1				316	2718080	437768	2296768	2864192		54361.6	8755.36	45935.4	57283.8
	317	1021296	158528	838304	1046720		20425.9	3170.56	16766.1	20934.4				317	1542624	240892	1279424	1625728		30852.5	4817.84	25588.5	32514.6				317	2229440	333000	1730112	2224384		44588.8	6660	34602.2	44487.7				317	2811520	421752	2248960	2924992		56230.4	8435.04	44979.2	58499.8
	318	1012544	161812	816208	1024880		20250.9	3236.24	16324.2	20497.6				318	1585312	241600	1309952	1658368		31706.2	4832	26199	33167.4				318	2176768	358736	1762048	2201408		43535.4	7174.72	35241	44028.2				318	2791296	440264	2181888	2810624		55825.9	8805.28	43637.8	56212.5
	319	1016032	164540	802608	1059584		20320.6	3290.8	16052.2	21191.7				319	1612064	245704	1250528	1590080		32241.3	4914.08	25010.6	31801.6				319	2122112	326088	1753824	2193024		42442.2	6521.76	35076.5	43860.5				319	2649152	440064	2325056	2921920		52983	8801.28	46501.1	58438.4
	320	994112	156708	811968	1027440		19882.2	3134.16	16239.4	20548.8				320	1611744	245808	1337856	1595520		32234.9	4916.16	26757.1	31910.4				320	2215552	329848	1757664	2205248		44311	6596.96	35153.3	44105				320	2787328	422512	2156096	2919744		55746.6	8450.24	43121.9	58394.9
	321	1025936	160748	806704	1057344		20518.7	3214.96	16134.1	21146.9				321	1611680	253712	1293536	1623584		32233.6	5074.24	25870.7	32471.7				321	2142656	323248	1781536	2211520		42853.1	6464.96	35630.7	44230.4				321	2781248	430168	2187392	2854912		55625	8603.36	43747.8	57098.2
	322	1028944	153728	810992	1070144		20578.9	3074.56	16219.8	21402.9				322	1601824	231620	1305888	1632544		32036.5	4632.4	26117.8	32650.9				322	2124672	337832	1748256	2235136		42493.4	6756.64	34965.1	44702.7				322	2748608	442560	2256320	2914560		54972.2	8851.2	45126.4	58291.2
	323	993536	150292	814768	1012848		19870.7	3005.84	16295.4	20257				323	1568832	245856	1278432	1661984		31376.6	4917.12	25568.6	33239.7				323	2244736	341544	1768704	2194624		44894.7	6830.88	35374.1	43892.5				323	2821632	416648	2242048	2833344		56432.6	8332.96	44841	56666.9
	324	1030720	159892	816048	1063136		20614.4	3197.84	16321	21262.7				324	1592800	239776	1316992	1656384		31856	4795.52	26339.8	33127.7				324	2135616	341240	1758464	2261504		42712.3	6824.8	35169.3	45230.1				324	2783552	435672	2292160	2849216		55671	8713.44	45843.2	56984.3
	325	1032448	164136	833072	1015824		20649	3282.72	16661.4	20316.5				325	1627680	251484	1297856	1600768		32553.6	5029.68	25957.1	32015.4				325	2075104	332800	1758432	2258880		41502.1	6656	35168.6	45177.6				325	2755840	441184	2321152	2889152		55116.8	8823.68	46423	57783
	326	1013632	159132	834944	1078016		20272.6	3182.64	16698.9	21560.3				326	1592064	246720	1296640	1666144		31841.3	4934.4	25932.8	33322.9				326	2183104	338240	1701344	2148160		43662.1	6764.8	34026.9	42963.2				326	2825344	430416	2196096	2862912		56506.9	8608.32	43921.9	57258.2
	327	1018528	158628	843264	1041456		20370.6	3172.56	16865.3	20829.1				327	1583072	243680	1289760	1661440		31661.4	4873.6	25795.2	33228.8				327	2170560	344088	1811296	2233792		43411.2	6881.76	36225.9	44675.8				327	2817472	445064	2275008	2860928		56349.4	8901.28	45500.2	57218.6
	328	1029056	158576	837632	1025248		20581.1	3171.52	16752.6	20505				328	1558016	245048	1290624	1654048		31160.3	4900.96	25812.5	33081				328	2128128	330000	1745600	2278912		42562.6	6600	34912	45578.2				328	2855616	433280	2278144	2842880		57112.3	8665.6	45562.9	56857.6
	329	989168	158932	826144	1036656		19783.4	3178.64	16522.9	20733.1				329	1593024	252444	1326048	1603264		31860.5	5048.88	26521	32065.3				329	2168832	342304	1718944	2199872		43376.6	6846.08	34378.9	43997.4				329	2748544	439504	2236672	2855808		54970.9	8790.08	44733.4	57116.2
	330	1017600	162264	810832	1061888		20352	3245.28	16216.6	21237.8				330	1594016	240588	1318016	1655072		31880.3	4811.76	26360.3	33101.4				330	2184448	335088	1769856	2241472		43689	6701.76	35397.1	44829.4				330	2812352	434144	2256512	2910720		56247	8682.88	45130.2	58214.4
	331	1029472	156204	815120	1042912		20589.4	3124.08	16302.4	20858.2				331	1624768	246464	1285344	1642112		32495.4	4929.28	25706.9	32842.2				331	2124352	326856	1785600	2266944		42487	6537.12	35712	45338.9				331	2790144	425112	2250240	2952128		55802.9	8502.24	45004.8	59042.6
	332	973776	161556	832720	1045056		19475.5	3231.12	16654.4	20901.1				332	1630624	242056	1292736	1581440		32612.5	4841.12	25854.7	31628.8				332	2200768	336304	1809536	2203456		44015.4	6726.08	36190.7	44069.1				332	2812160	426440	2357248	2921024		56243.2	8528.8	47145	58420.5
	333	1027120	158072	816256	1030256		20542.4	3161.44	16325.1	20605.1				333	1598432	248592	1255808	1627328		31968.6	4971.84	25116.2	32546.6				333	2128832	336304	1781408	2239552		42576.6	6726.08	35628.2	44791				333	2913792	442664	2220352	2772352		58275.8	8853.28	44407	55447
	334	1020304	160852	810832	1084800		20406.1	3217.04	16216.6	21696				334	1633920	246008	1294272	1577280		32678.4	4920.16	25885.4	31545.6				334	2211456	318216	1764480	2271360		44229.1	6364.32	35289.6	45427.2				334	2744384	419304	2238400	2796224		54887.7	8386.08	44768	55924.5
	335	1026448	160548	837424	1042496		20529	3210.96	16748.5	20849.9				335	1561408	245960	1270560	1644128		31228.2	4919.2	25411.2	32882.6				335	2145920	339256	1715648	2187392		42918.4	6785.12	34313	43747.8				335	2727424	431392	2194880	2870208		54548.5	8627.84	43897.6	57404.2
	336	1034992	153576	813216	1067744		20699.8	3071.52	16264.3	21354.9				336	1584448	241448	1275552	1644256		31689	4828.96	25511	32885.1				336	2092832	334728	1717664	2278080		41856.6	6694.56	34353.3	45561.6				336	2802944	428584	2212736	2901440		56058.9	8571.68	44254.7	58028.8
	337	1025040	157716	824176	1030352		20500.8	3154.32	16483.5	20607				337	1611040	246668	1269984	1632064		32220.8	4933.36	25399.7	32641.3				337	2252288	336000	1689536	2239104		45045.8	6720	33790.7	44782.1				337	2897856	431488	2250240	2904192		57957.1	8629.76	45004.8	58083.8
	338	1040736	154888	804736	1088320		20814.7	3097.76	16094.7	21766.4				338	1560448	247024	1264768	1640672		31209	4940.48	25295.4	32813.4				338	2178880	336712	1719808	2193088		43577.6	6734.24	34396.2	43861.8				338	2854528	424200	2172352	2800448		57090.6	8484	43447	56009
	339	1002080	160444	807680	1058240		20041.6	3208.88	16153.6	21164.8				339	1613216	250268	1278656	1640032		32264.3	5005.36	25573.1	32800.6				339	2113792	342208	1762656	2318848		42275.8	6844.16	35253.1	46377				339	2714176	428224	2257472	2887488		54283.5	8564.48	45149.4	57749.8
	340	981360	158728	826448	1051296		19627.2	3174.56	16529	21025.9				340	1585376	251432	1295008	1612256		31707.5	5028.64	25900.2	32245.1				340	2199808	326800	1697504	2229440		43996.2	6536	33950.1	44588.8				340	2821632	433480	2263104	2847808		56432.6	8669.6	45262.1	56956.2
	341	984224	161304	817760	1054496		19684.5	3226.08	16355.2	21089.9				341	1520128	244136	1284480	1685984		30402.6	4882.72	25689.6	33719.7				341	2172544	345768	1763680	2178304		43450.9	6915.36	35273.6	43566.1				341	2708992	430216	2262592	2805568		54179.8	8604.32	45251.8	56111.4
	342	1042144	160344	817040	1048400		20842.9	3206.88	16340.8	20968				342	1607264	240184	1251072	1692864		32145.3	4803.68	25021.4	33857.3				342	2185856	327008	1779808	2272704		43717.1	6540.16	35596.2	45454.1				342	2796928	416752	2304896	2857472		55938.6	8335.04	46097.9	57149.4
	343	1029568	164436	835712	1066688		20591.4	3288.72	16714.2	21333.8				343	1597376	243832	1303520	1532704		31947.5	4876.64	26070.4	30654.1				343	2215616	339000	1717984	2182976		44312.3	6780	34359.7	43659.5				343	2865600	419048	2211968	2868672		57312	8380.96	44239.4	57373.4
	344	1005504	157868	812592	1035824		20110.1	3157.36	16251.8	20716.5				344	1560384	244540	1245824	1695840		31207.7	4890.8	24916.5	33916.8				344	2197120	347752	1747840	2154624		43942.4	6955.04	34956.8	43092.5				344	2735360	433528	2282304	2860480		54707.2	8670.56	45646.1	57209.6
	345	1025040	161608	826816	1036144		20500.8	3232.16	16536.3	20722.9				345	1627840	249812	1256576	1658624		32556.8	4996.24	25131.5	33172.5				345	2139840	345208	1719808	2266048		42796.8	6904.16	34396.2	45321				345	2788928	438688	2240640	2834048		55778.6	8773.76	44812.8	56681
	346	971168	154536	836960	1067328		19423.4	3090.72	16739.2	21346.6				346	1615872	255232	1255904	1633920		32317.4	5104.64	25118.1	32678.4				346	2226048	332952	1736192	2192384		44521	6659.04	34723.8	43847.7				346	2770624	433280	2231424	2876480		55412.5	8665.6	44628.5	57529.6
	347	1033008	157972	776928	1086176		20660.2	3159.44	15538.6	21723.5				347	1574304	246416	1294464	1661088		31486.1	4928.32	25889.3	33221.8				347	2109952	347240	1719104	2223168		42199	6944.8	34382.1	44463.4				347	2782976	440112	2236928	2835776		55659.5	8802.24	44738.6	56715.5
	348	1012128	154636	827648	1036304		20242.6	3092.72	16553	20726.1				348	1622432	243576	1266368	1614016		32448.6	4871.52	25327.4	32280.3				348	2175296	324512	1766016	2238400		43505.9	6490.24	35320.3	44768				348	2799360	446592	2221056	2920576		55987.2	8931.84	44421.1	58411.5
	349	1019408	159688	826240	1054080		20388.2	3193.76	16524.8	21081.6				349	1623328	253712	1338656	1649152		32466.6	5074.24	26773.1	32983				349	2178432	342616	1710080	2188096		43568.6	6852.32	34201.6	43761.9				349	2740160	420832	2223424	2912320		54803.2	8416.64	44468.5	58246.4
	350	1042560	157568	792944	1018848		20851.2	3151.36	15858.9	20377				350	1582400	248036	1256960	1693824		31648	4960.72	25139.2	33876.5				350	2190144	344040	1733728	2253312		43802.9	6880.8	34674.6	45066.2				350	2709312	439296	2206848	2868224		54186.2	8785.92	44137	57364.5
	351	1003280	162164	853520	1042656		20065.6	3243.28	17070.4	20853.1				351	1675584	241096	1272672	1623968		33511.7	4821.92	25453.4	32479.4				351	2139840	327664	1730112	2264832		42796.8	6553.28	34602.2	45296.6				351	2865024	425112	2320384	2848384		57300.5	8502.24	46407.7	56967.7
	352	1008784	155344	840992	1050048		20175.7	3106.88	16819.8	21001				352	1584736	250672	1335168	1648704		31694.7	5013.44	26703.4	32974.1				352	2200448	326040	1772448	2228224		44009	6520.8	35449	44564.5				352	2705088	437968	2292288	2919872		54101.8	8759.36	45845.8	58397.4
	353	1038912	158676	808864	1032960		20778.2	3173.52	16177.3	20659.2				353	1598016	245552	1312096	1679776		31960.3	4911.04	26241.9	33595.5				353	2185152	344544	1720768	2279168		43703	6890.88	34415.4	45583.4				353	2877760	416600	2226240	2892416		57555.2	8332	44524.8	57848.3
	354	1018896	157972	828528	1060160		20377.9	3159.44	16570.6	21203.2				354	1645792	239472	1275328	1614016		32915.8	4789.44	25506.6	32280.3				354	2181440	336208	1790560	2258624		43628.8	6724.16	35811.2	45172.5				354	2750912	418176	2299008	2811840		55018.2	8363.52	45980.2	56236.8
	355	999472	151908	815184	1065792		19989.4	3038.16	16303.7	21315.8				355	1582272	245960	1352544	1630816		31645.4	4919.2	27050.9	32616.3				355	2201792	343936	1743232	2258368		44035.8	6878.72	34864.6	45167.4				355	2722560	428632	2244992	2898880		54451.2	8572.64	44899.8	57977.6
	356	1031968	162772	807632	1025248		20639.4	3255.44	16152.6	20505				356	1551968	242664	1269408	1663360		31039.4	4853.28	25388.2	33267.2				356	2188544	352432	1794592	2304896		43770.9	7048.64	35891.8	46097.9				356	2670464	435064	2252800	2919680		53409.3	8701.28	45056	58393.6
	357	1040992	158676	821696	1051296		20819.8	3173.52	16433.9	21025.9				357	1587744	236940	1289696	1634944		31754.9	4738.8	25793.9	32698.9				357	2099648	322384	1734912	2186624		41993	6447.68	34698.2	43732.5				357	2683264	438432	2304384	2870080		53665.3	8768.64	46087.7	57401.6
	358	977984	158020	838464	1051840		19559.7	3160.4	16769.3	21036.8				358	1590048	252444	1339840	1698816		31801	5048.88	26796.8	33976.3				358	2116608	339768	1708704	2271744		42332.2	6795.36	34174.1	45434.9				358	2751936	420472	2289216	2910592		55038.7	8409.44	45784.3	58211.8
	359	1042032	154132	847728	1031184		20840.6	3082.64	16954.6	20623.7				359	1605184	249000	1290368	1631136		32103.7	4980	25807.4	32622.7				359	2204736	346480	1757632	2237632		44094.7	6929.6	35152.6	44752.6				359	2819712	444040	2263296	2912256		56394.2	8880.8	45265.9	58245.1
	360	1013008	160900	848496	1046624		20260.2	3218	16969.9	20932.5				360	1611744	254776	1281024	1638432		32234.9	5095.52	25620.5	32768.6				360	2140928	333256	1758784	2192000		42818.6	6665.12	35175.7	43840				360	2787008	428432	2213632	2886848		55740.2	8568.64	44272.6	57737
	361	965392	152768	816624	1070752		19307.8	3055.36	16332.5	21415				361	1559296	255844	1341696	1670496		31185.9	5116.88	26833.9	33409.9				361	2203264	343072	1757888	2210368		44065.3	6861.44	35157.8	44207.4				361	2813440	429448	2235584	2802624		56268.8	8588.96	44711.7	56052.5
	362	1031600	159636	803488	1030000		20632	3192.72	16069.8	20600				362	1608736	238360	1283968	1642208		32174.7	4767.2	25679.4	32844.2				362	2129472	343376	1725952	2294528		42589.4	6867.52	34519	45890.6				362	2818688	420424	2222976	2795904		56373.8	8408.48	44459.5	55918.1
	363	1004208	161760	849120	1068352		20084.2	3235.2	16982.4	21367				363	1595776	252396	1326944	1600768		31915.5	5047.92	26538.9	32015.4				363	2186560	328736	1770720	2207488		43731.2	6574.72	35414.4	44149.8				363	2801152	459920	2238656	2777216		56023	9198.4	44773.1	55544.3
	364	1030352	152264	805456	1056000		20607	3045.28	16109.1	21120				364	1516000	246972	1320832	1653824		30320	4939.44	26416.6	33076.5				364	2185728	359400	1781952	2252672		43714.6	7188	35639	45053.4				364	2792384	431696	2253440	2882112		55847.7	8633.92	45068.8	57642.2
	365	1042704	162012	833648	1018224		20854.1	3240.24	16673	20364.5				365	1620128	247328	1275392	1633504		32402.6	4946.56	25507.8	32670.1				365	2079712	331528	1794752	2338432		41594.2	6630.56	35895	46768.6				365	2708224	431184	2246272	2830656		54164.5	8623.68	44925.4	56613.1
	366	1002848	156204	846432	1032240		20057	3124.08	16928.6	20644.8				366	1609376	247632	1310368	1546656		32187.5	4952.64	26207.4	30933.1				366	2187840	325128	1758464	2286592		43756.8	6502.56	35169.3	45731.8				366	2818496	431744	2266240	2809856		56369.9	8634.88	45324.8	56197.1
	367	1016080	157164	791856	1022384		20321.6	3143.28	15837.1	20447.7				367	1581120	224428	1295584	1690976		31622.4	4488.56	25911.7	33819.5				367	2167168	326344	1728384	2208640		43343.4	6526.88	34567.7	44172.8				367	2745536	427560	2330176	2898880		54910.7	8551.2	46603.5	57977.6
	368	1009984	161152	848032	1038800		20199.7	3223.04	16960.6	20776				368	1571712	243272	1236928	1692096		31434.2	4865.44	24738.6	33841.9				368	2106048	332648	1748064	2252736		42121	6652.96	34961.3	45054.7				368	2820096	419248	2187136	2824576		56401.9	8384.96	43742.7	56491.5
	369	968160	154888	802144	1057056		19363.2	3097.76	16042.9	21141.1				369	1618368	248088	1283072	1643936		32367.4	4961.76	25661.4	32878.7				369	2123200	333208	1706304	2278976		42464	6664.16	34126.1	45579.5				369	2739712	427408	2303360	2923840		54794.2	8548.16	46067.2	58476.8
	370	1010304	154888	796048	1028064		20206.1	3097.76	15921	20561.3				370	1511104	245248	1313248	1657120		30222.1	4904.96	26265	33142.4				370	2141568	341648	1732992	2169600		42831.4	6832.96	34659.8	43392				370	2813056	438992	2298048	2950912		56261.1	8779.84	45961	59018.2
	371	1021136	162920	829808	1016752		20422.7	3258.4	16596.2	20335				371	1576128	242968	1252160	1662080		31522.6	4859.36	25043.2	33241.6				371	2071488	338744	1752288	2186368		41429.8	6774.88	35045.8	43727.4				371	2763840	439352	2294656	2773248		55276.8	8787.04	45893.1	55465
	372	991504	154588	834992	1076832		19830.1	3091.76	16699.8	21536.6				372	1597152	246160	1282080	1661984		31943	4923.2	25641.6	33239.7				372	2180864	317504	1707744	2216064		43617.3	6350.08	34154.9	44321.3				372	2761792	445624	2280000	2787968		55235.8	8912.48	45600	55759.4
	373	1003280	157012	802928	1027488		20065.6	3140.24	16058.6	20549.8				373	1540704	237548	1283264	1622752		30814.1	4750.96	25665.3	32455				373	2276096	347240	1792128	2211200		45521.9	6944.8	35842.6	44224				373	2803776	423480	2257280	2973504		56075.5	8469.6	45145.6	59470.1
	374	1016960	171108	829408	997696		20339.2	3422.16	16588.2	19953.9				374	1641728	243324	1276352	1606560		32834.6	4866.48	25527	32131.2				374	2153600	337680	1754144	2190272		43072	6753.6	35082.9	43805.4				374	2812288	426184	2184000	2814528		56245.8	8523.68	43680	56290.6
	375	990624	156656	819520	1062432		19812.5	3133.12	16390.4	21248.6				375	1588512	247376	1324896	1641056		31770.2	4947.52	26497.9	32821.1				375	2118656	354208	1733952	2247360		42373.1	7084.16	34679	44947.2				375	2801408	442256	2325376	2829056		56028.2	8845.12	46507.5	56581.1
	376	1024576	151808	824016	1064672		20491.5	3036.16	16480.3	21293.4				376	1537728	233192	1258144	1664864		30754.6	4663.84	25162.9	33297.3				376	2173504	341904	1762656	2237568		43470.1	6838.08	35253.1	44751.4				376	2728384	429808	2190848	2844992		54567.7	8596.16	43817	56899.8
	377	1018896	159688	807472	1035312		20377.9	3193.76	16149.4	20706.2				377	1604672	248392	1267936	1636640		32093.4	4967.84	25358.7	32732.8				377	2147584	342560	1728672	2222336		42951.7	6851.2	34573.4	44446.7				377	2840320	431240	2179648	2792192		56806.4	8624.8	43593	55843.8
	378	953440	151204	812288	1083360		19068.8	3024.08	16245.8	21667.2				378	1601824	254016	1296832	1619712		32036.5	5080.32	25936.6	32394.2				378	2208000	321616	1762272	2210304		44160	6432.32	35245.4	44206.1				378	2765248	437512	2356096	2891776		55305	8750.24	47121.9	57835.5
	379	1018640	160040	829920	1026864		20372.8	3200.8	16598.4	20537.3				379	1580640	248188	1226176	1673920		31612.8	4963.76	24523.5	33478.4				379	2134784	333104	1730144	2208832		42695.7	6662.08	34602.9	44176.6				379	2686336	422824	2214208	2877760		53726.7	8456.48	44284.2	57555.2
	380	1022176	158124	832768	1048400		20443.5	3162.48	16655.4	20968				380	1591328	240588	1294272	1612832		31826.6	4811.76	25885.4	32256.6				380	2164544	325328	1751264	2211328		43290.9	6506.56	35025.3	44226.6				380	2805824	440320	2176768	2950528		56116.5	8806.4	43535.4	59010.6
	381	998944	156860	816320	1048640		19978.9	3137.2	16326.4	20972.8				381	1611104	246820	1315424	1656032		32222.1	4936.4	26308.5	33120.6				381	2131136	333056	1820416	2190656		42622.7	6661.12	36408.3	43813.1				381	2749184	430416	2236096	2929728		54983.7	8608.32	44721.9	58594.6
	382	1040256	162216	812384	1022496		20805.1	3244.32	16247.7	20449.9				382	1594560	244792	1271072	1688320		31891.2	4895.84	25421.4	33766.4				382	2161280	332040	1762752	2244352		43225.6	6640.8	35255	44887				382	2813952	414864	2284096	2826112		56279	8297.28	45681.9	56522.2
	383	1010560	152820	814912	1082976		20211.2	3056.4	16298.2	21659.5				383	1611520	243880	1271360	1551328		32230.4	4877.6	25427.2	31026.6				383	2099072	330360	1754528	2219648		41981.4	6607.2	35090.6	44393				383	2869824	442768	2265152	2866112		57396.5	8855.36	45303	57322.2
	384	1005920	151352	862224	1054688		20118.4	3027.04	17244.5	21093.8				384	1591040	246416	1351968	1593120		31820.8	4928.32	27039.4	31862.4				384	2104640	327256	1703264	2267648		42092.8	6545.12	34065.3	45353				384	2681536	429656	2274624	2875200		53630.7	8593.12	45492.5	57504
	385	1016864	163324	792064	1044800		20337.3	3266.48	15841.3	20896				385	1554336	233192	1258848	1662048		31086.7	4663.84	25177	33241				385	2169152	321920	1717184	2218240		43383	6438.4	34343.7	44364.8				385	2799296	426440	2254848	2866048		55985.9	8528.8	45097	57321
	386	1004880	156556	856576	1060032		20097.6	3131.12	17131.5	21200.6				386	1612960	258328	1293056	1636832		32259.2	5166.56	25861.1	32736.6				386	2142848	339920	1738752	2281152		42857	6798.4	34775	45623				386	2848704	443224	2271488	2872704		56974.1	8864.48	45429.8	57454.1
	387	999792	155244	821696	1088160		19995.8	3104.88	16433.9	21763.2				387	1602944	247784	1328896	1685216		32058.9	4955.68	26577.9	33704.3				387	2186752	330968	1752960	2210624		43735	6619.36	35059.2	44212.5				387	2727104	429448	2225664	2856576		54542.1	8588.96	44513.3	57131.5
	388	1057824	167268	793360	1013536		21156.5	3345.36	15867.2	20270.7				388	1553120	243376	1216992	1623648		31062.4	4867.52	24339.8	32473				388	2110784	343168	1810592	2174528		42215.7	6863.36	36211.8	43490.6				388	2653248	433376	2188160	2883520		53065	8667.52	43763.2	57670.4
	389	998272	158828	823712	1052704		19965.4	3176.56	16474.2	21054.1				389	1596512	249404	1265760	1604544		31930.2	4988.08	25315.2	32090.9				389	2204224	330560	1745664	2239936		44084.5	6611.2	34913.3	44798.7				389	2837312	442816	2229440	2894784		56746.2	8856.32	44588.8	57895.7
	390	990672	157616	845712	1042400		19813.4	3152.32	16914.2	20848				390	1596640	250976	1354912	1671776		31932.8	5019.52	27098.2	33435.5				390	2194688	327312	1734336	2252864		43893.8	6546.24	34686.7	45057.3				390	2781760	412064	2266432	2921088		55635.2	8241.28	45328.6	58421.8
	391	1032080	160700	786384	1041712		20641.6	3214	15727.7	20834.2				391	1612800	245856	1268192	1621824		32256	4917.12	25363.8	32436.5				391	2150080	322384	1769536	2150208		43001.6	6447.68	35390.7	43004.2				391	2787456	435064	2195904	2831360		55749.1	8701.28	43918.1	56627.2
	392	992608	164692	845760	1077344		19852.2	3293.84	16915.2	21546.9				392	1637120	251584	1304416	1630496		32742.4	5031.68	26088.3	32609.9				392	2181504	327816	1742912	2234048		43630.1	6556.32	34858.2	44681				392	2755456	439552	2233728	2848320		55109.1	8791.04	44674.6	56966.4
	393	1011968	161708	816368	1043440		20239.4	3234.16	16327.4	20868.8				393	1581536	239472	1290944	1745504		31630.7	4789.44	25818.9	34910.1				393	2135680	328072	1729728	2258816		42713.6	6561.44	34594.6	45176.3				393	2732352	419400	2296384	2876736		54647	8388	45927.7	57534.7
	394	1054656	159636	820192	1036816		21093.1	3192.72	16403.8	20736.3				394	1609600	245096	1268992	1577920		32192	4901.92	25379.8	31558.4				394	2237120	337224	1721024	2165888		44742.4	6744.48	34420.5	43317.8				394	2820480	410784	2238080	2919744		56409.6	8215.68	44761.6	58394.9
	395	1003792	162568	825472	1101152		20075.8	3251.36	16509.4	22023				395	1600256	246312	1295168	1617536		32005.1	4926.24	25903.4	32350.7				395	2132352	332648	1770816	2279936		42647	6652.96	35416.3	45598.7				395	2790144	428176	2294208	2836032		55802.9	8563.52	45884.2	56720.6
	396	1011504	159184	809392	1047040		20230.1	3183.68	16187.8	20940.8				396	1551904	238104	1321536	1661984		31038.1	4762.08	26430.7	33239.7				396	2158592	338496	1705120	2294144		43171.8	6769.92	34102.4	45882.9				396	2724928	427720	2180352	2872896		54498.6	8554.4	43607	57457.9
	397	1039328	160296	828784	1042448		20786.6	3205.92	16575.7	20849				397	1588512	247376	1282592	1582016		31770.2	4947.52	25651.8	31640.3				397	2207424	334272	1790080	2263616		44148.5	6685.44	35801.6	45272.3				397	2830784	435168	2239616	2824512		56615.7	8703.36	44792.3	56490.2
	398	998896	156304	847200	1097248		19977.9	3126.08	16944	21945				398	1544096	242464	1314784	1669280		30881.9	4849.28	26295.7	33385.6				398	2143424	357720	1737248	2253568		42868.5	7154.4	34745	45071.4				398	2801792	432360	2324352	2875840		56035.8	8647.2	46487	57516.8
	399	1034896	154384	794800	1028736		20697.9	3087.68	15896	20574.7				399	1561952	248240	1301472	1675264		31239	4964.8	26029.4	33505.3				399	2201088	339560	1790208	2210496		44021.8	6791.2	35804.2	44209.9				399	2758144	414352	2301056	2782464		55162.9	8287.04	46021.1	55649.3
	400	1031136	158072	836080	1052608		20622.7	3161.44	16721.6	21052.2				400	1650848	243324	1274336	1609024		33017	4866.48	25486.7	32180.5				400	2160832	345968	1752320	2163072		43216.6	6919.36	35046.4	43261.4				400	2841280	434248	2155008	2792768		56825.6	8684.96	43100.2	55855.4
	401	984800	156052	855072	1080736		19696	3121.04	17101.4	21614.7				401	1590624	243728	1321728	1632000		31812.5	4874.56	26434.6	32640				401	2095584	331224	1712160	2180544		41911.7	6624.48	34243.2	43610.9				401	2858432	436440	2276736	2899008		57168.6	8728.8	45534.7	57980.2
	402	1031392	154384	776160	1029632		20627.8	3087.68	15523.2	20592.6				402	1539264	237852	1262368	1686624		30785.3	4757.04	25247.4	33732.5				402	2057920	335344	1717280	2264768		41158.4	6706.88	34345.6	45295.4				402	2679040	421752	2213568	2883904		53580.8	8435.04	44271.4	57678.1
	403	1043328	162668	800496	1020144		20866.6	3253.36	16009.9	20402.9				403	1648928	245148	1231744	1621728		32978.6	4902.96	24634.9	32434.6				403	2207040	343168	1753120	2164992		44140.8	6863.36	35062.4	43299.8				403	2892544	426848	2193536	2889024		57850.9	8536.96	43870.7	57780.5
	404	979024	158728	818688	1097824		19580.5	3174.56	16373.8	21956.5				404	1575808	249252	1319040	1636800		31516.2	4985.04	26380.8	32736				404	2179392	335544	1736928	2298368		43587.8	6710.88	34738.6	45967.4				404	2761792	427152	2260224	2838976		55235.8	8543.04	45204.5	56779.5
	405	991824	158020	790624	1038544		19836.5	3160.4	15812.5	20770.9				405	1524320	245300	1272960	1676800		30486.4	4906	25459.2	33536				405	2122880	336304	1759456	2185280		42457.6	6726.08	35189.1	43705.6				405	2719424	430472	2231232	2804608		54388.5	8609.44	44624.6	56092.2
	406	1034992	159840	834368	1050624		20699.8	3196.8	16687.4	21012.5				406	1656480	245756	1280160	1579584		33129.6	4915.12	25603.2	31591.7				406	2219200	334680	1773120	2183104		44384	6693.6	35462.4	43662.1				406	2911104	425880	2134528	2849344		58222.1	8517.6	42690.6	56986.9
	407	976320	158324	815696	1068640		19526.4	3166.48	16313.9	21372.8				407	1623584	258732	1270240	1641952		32471.7	5174.64	25404.8	32839				407	2113728	332088	1797920	2317952		42274.6	6641.76	35958.4	46359				407	2784384	433888	2330752	2886848		55687.7	8677.76	46615	57737
	408	1048800	152464	799456	1020768		20976	3049.28	15989.1	20415.4				408	1562720	237752	1300416	1661504		31254.4	4755.04	26008.3	33230.1				408	2163072	324312	1696960	2240000		43261.4	6486.24	33939.2	44800				408	2800768	410536	2161024	2845376		56015.4	8210.72	43220.5	56907.5
	409	1030048	165600	845600	1064512		20601	3312	16912	21290.2				409	1617888	245552	1263200	1583168		32357.8	4911.04	25264	31663.4				409	2193408	331272	1758944	2213504		43868.2	6625.44	35178.9	44270.1				409	2873408	436288	2224448	2783936		57468.2	8725.76	44489	55678.7
	410	1026240	152968	827376	1059712		20524.8	3059.36	16547.5	21194.2				410	1570336	240080	1303328	1651872		31406.7	4801.6	26066.6	33037.4				410	2161152	330920	1811552	2261632		43223	6618.4	36231	45232.6				410	2729536	444248	2278848	2882368		54590.7	8884.96	45577	57647.4
	411	1010880	157568	787152	1003904		20217.6	3151.36	15743	20078.1				411	1588704	254168	1274144	1660128		31774.1	5083.36	25482.9	33202.6				411	2182720	338088	1753440	2100480		43654.4	6761.76	35068.8	42009.6				411	2793536	429552	2197952	2912704		55870.7	8591.04	43959	58254.1
	412	992400	160296	859472	1075296		19848	3205.92	17189.4	21505.9				412	1645728	245756	1283488	1620288		32914.6	4915.12	25669.8	32405.8				412	2128640	340576	1705024	2183488		42572.8	6811.52	34100.5	43669.8				412	2848768	430880	2295104	2693056		56975.4	8617.6	45902.1	53861.1
	413	1008576	155748	836496	1091136		20171.5	3114.96	16729.9	21822.7				413	1548032	247072	1296160	1642176		30960.6	4941.44	25923.2	32843.5				413	2117312	317552	1784512	2308032		42346.2	6351.04	35690.2	46160.6				413	2744384	418792	2284864	2935488		54887.7	8375.84	45697.3	58709.8
	414	1024576	167824	826240	1053440		20491.5	3356.48	16524.8	21068.8				414	1584768	238056	1248704	1634560		31695.4	4761.12	24974.1	32691.2				414	2195072	324264	1741056	2191168		43901.4	6485.28	34821.1	43823.4				414	2727872	427616	2178560	2826944		54557.4	8552.32	43571.2	56538.9
	415	1015776	157060	833952	1059072		20315.5	3141.2	16679	21181.4				415	1626624	256704	1295648	1618112		32532.5	5134.08	25913	32362.2				415	2189696	337680	1794688	2143680		43793.9	6753.6	35893.8	42873.6				415	2834304	447104	2210944	2818816		56686.1	8942.08	44218.9	56376.3
	416	1015456	157212	794544	1038640		20309.1	3144.24	15890.9	20772.8				416	1584416	243780	1303584	1614272		31688.3	4875.6	26071.7	32285.4				416	2191680	332288	1718624	2276928		43833.6	6645.76	34372.5	45538.6				416	2770176	439352	2228928	2889344		55403.5	8787.04	44578.6	57786.9
	417	1061376	156356	825520	1066944		21227.5	3127.12	16510.4	21338.9				417	1592576	244388	1280960	1658208		31851.5	4887.76	25619.2	33164.2				417	2151360	322176	1754592	2200512		43027.2	6443.52	35091.8	44010.2				417	2830336	420216	2192320	2796288		56606.7	8404.32	43846.4	55925.8
	418	964512	160144	826704	1067744		19290.2	3202.88	16534.1	21354.9				418	1649664	252040	1278560	1679200		32993.3	5040.8	25571.2	33584				418	2148224	342104	1726592	2249344		42964.5	6842.08	34531.8	44986.9				418	2860032	439448	2241664	2847488		57200.6	8788.96	44833.3	56949.8
	419	1044592	152564	843264	1058720		20891.8	3051.28	16865.3	21174.4				419	1590560	235472	1356448	1636960		31811.2	4709.44	27129	32739.2				419	2166656	314400	1725344	2212928		43333.1	6288	34506.9	44258.6				419	2718336	419304	2241792	2966848		54366.7	8386.08	44835.8	59337
	420	1036240	163932	807728	1033488		20724.8	3278.64	16154.6	20669.8				420	1640160	241096	1279072	1637792		32803.2	4821.92	25581.4	32755.8				420	2157952	328176	1710304	2172800		43159	6563.52	34206.1	43456				420	2778368	422768	2192064	2871104		55567.4	8455.36	43841.3	57422.1
	421	1027744	154132	847520	1077600		20554.9	3082.64	16950.4	21552				421	1621504	238056	1294688	1643936		32430.1	4761.12	25893.8	32878.7				421	2196800	345768	1820736	2313344		43936	6915.36	36414.7	46266.9				421	2773504	445576	2237568	2716480		55470.1	8911.52	44751.4	54329.6
	422	998176	148172	793568	1059168		19963.5	2963.44	15871.4	21183.4				422	1570208	242160	1303488	1677824		31404.2	4843.2	26069.8	33556.5				422	2108864	323248	1770336	2294592		42177.3	6464.96	35406.7	45891.8				422	2702784	420528	2256256	2987072		54055.7	8410.56	45125.1	59741.4
	423	1043808	159436	827120	1030880		20876.2	3188.72	16542.4	20617.6				423	1633760	246008	1246496	1654112		32675.2	4920.16	24929.9	33082.2				423	2200576	345968	1706976	2161792		44011.5	6919.36	34139.5	43235.8				423	2868864	423328	2209088	2836416		57377.3	8466.56	44181.8	56728.3
	424	995456	160396	826768	1053440		19909.1	3207.92	16535.4	21068.8				424	1594304	255540	1275296	1681216		31886.1	5110.8	25505.9	33624.3				424	2153280	350344	1791968	2311360		43065.6	7006.88	35839.4	46227.2				424	2800064	427464	2256192	2824064		56001.3	8549.28	45123.8	56481.3
	425	1007024	161052	810000	1021392		20140.5	3221.04	16200	20427.8				425	1549632	245856	1271360	1692544		30992.6	4917.12	25427.2	33850.9				425	2114496	328272	1789344	2302720		42289.9	6565.44	35786.9	46054.4				425	2751168	426336	2253312	2945600		55023.4	8526.72	45066.2	58912
	426	1047456	157868	830288	1046208		20949.1	3157.36	16605.8	20924.2				426	1609984	247984	1284384	1611360		32199.7	4959.68	25687.7	32227.2				426	2220288	345968	1686784	2071040		44405.8	6919.36	33735.7	41420.8				426	2863936	424352	2192448	2744192		57278.7	8487.04	43849	54883.8
	427	978912	153120	871296	1075136		19578.2	3062.4	17425.9	21502.7				427	1572864	250268	1282848	1529248		31457.3	5005.36	25657	30585				427	2168576	335800	1806784	2231744		43371.5	6716	36135.7	44634.9				427	2800768	427768	2337024	2881024		56015.4	8555.36	46740.5	57620.5
	428	1055776	155496	782208	1038848		21115.5	3109.92	15644.2	20777				428	1561248	242664	1294944	1715360		31225	4853.28	25898.9	34307.2				428	2133824	336304	1721024	2316544		42676.5	6726.08	34420.5	46330.9				428	2693760	429248	2249152	3004672		53875.2	8584.96	44983	60093.4
	429	1015616	164588	814864	1023472		20312.3	3291.76	16297.3	20469.4				429	1639296	247224	1273664	1594720		32785.9	4944.48	25473.3	31894.4				429	2143104	337272	1734848	2184064		42862.1	6745.44	34697	43681.3				429	2870080	447720	2251584	2803200		57401.6	8954.4	45031.7	56064
	430	995728	154736	842384	1046048		19914.6	3094.72	16847.7	20921				430	1557376	250824	1281856	1639456		31147.5	5016.48	25637.1	32789.1				430	2116608	334632	1801216	2214656		42332.2	6692.64	36024.3	44293.1				430	2816128	442408	2219968	2869888		56322.6	8848.16	44399.4	57397.8
	431	1026816	159488	817712	1038704		20536.3	3189.76	16354.2	20774.1				431	1604288	246768	1263104	1675200		32085.8	4935.36	25262.1	33504				431	2179584	334272	1667456	2219968		43591.7	6685.44	33349.1	44399.4				431	2693184	407832	2163584	2834240		53863.7	8156.64	43271.7	56684.8
	432	1004160	158424	834736	1030560		20083.2	3168.48	16694.7	20611.2				432	1590624	251788	1262944	1577184		31812.5	5035.76	25258.9	31543.7				432	2193856	335040	1759456	2183296		43877.1	6700.8	35189.1	43665.9				432	2788608	447360	2233408	2741184		55772.2	8947.2	44668.2	54823.7
	433	998528	156708	823136	1075552		19970.6	3134.16	16462.7	21511				433	1585248	245096	1265408	1619776		31705	4901.92	25308.2	32395.5				433	2115520	333000	1772448	2262848		42310.4	6660	35449	45257				433	2764288	439552	2343104	2904192		55285.8	8791.04	46862.1	58083.8
	434	1016400	159284	855184	1065344		20328	3185.68	17103.7	21306.9				434	1571232	245300	1290368	1656128		31424.6	4906	25807.4	33122.6				434	2138432	334576	1755072	2170624		42768.6	6691.52	35101.4	43412.5				434	2743808	412216	2202432	2878848		54876.2	8244.32	44048.6	57577
	435	1011968	151456	848752	1061440		20239.4	3029.12	16975	21228.8				435	1641568	245960	1264672	1644448		32831.4	4919.2	25293.4	32889				435	2252160	344592	1821696	2226880		45043.2	6891.84	36433.9	44537.6				435	2836224	440672	2213696	2798784		56724.5	8813.44	44273.9	55975.7
	436	997392	156556	832352	1060544		19947.8	3131.12	16647	21210.9				436	1619808	239980	1307360	1668096		32396.2	4799.6	26147.2	33361.9				436	2112384	327720	1762752	2243712		42247.7	6554.4	35255	44874.2				436	2713344	439600	2288384	2828800		54266.9	8792	45767.7	56576
	437	1058464	148980	814400	1051936		21169.3	2979.6	16288	21038.7				437	1603904	248136	1274816	1654208		32078.1	4962.72	25496.3	33084.2				437	2123200	332848	1689600	2292352		42464	6656.96	33792	45847				437	2782208	409056	2167296	2937408		55644.2	8181.12	43345.9	58748.2
	438	1012912	153980	787008	1060576		20258.2	3079.6	15740.2	21211.5				438	1599328	244692	1269504	1634496		31986.6	4893.84	25390.1	32689.9				438	2168000	327312	1723424	2130176		43360	6546.24	34468.5	42603.5				438	2836992	442872	2246336	2914688		56739.8	8857.44	44926.7	58293.8
	439	995152	151960	818384	1027280		19903	3039.2	16367.7	20545.6				439	1587648	249760	1298112	1641952		31753	4995.2	25962.2	32839				439	2147392	340784	1700736	2325952		42947.8	6815.68	34014.7	46519				439	2775680	439296	2267328	2911744		55513.6	8785.92	45346.6	58234.9
	440	1016752	163428	808560	1045936		20335	3268.56	16171.2	20918.7				440	1625184	242664	1306944	1622432		32503.7	4853.28	26138.9	32448.6				440	2139840	334016	1699296	2268096		42796.8	6680.32	33985.9	45361.9				440	2726976	415480	2216256	2816640		54539.5	8309.6	44325.1	56332.8
	441	1016912	159788	839952	1035680		20338.2	3195.76	16799	20713.6				441	1591584	248744	1304416	1647616		31831.7	4974.88	26088.3	32952.3				441	2102144	351360	1749184	2221184		42042.9	7027.2	34983.7	44423.7				441	2844224	436848	2305600	2656896		56884.5	8736.96	46112	53137.9
	442	1032080	152112	826240	1057088		20641.6	3042.24	16524.8	21141.8				442	1577664	244236	1331168	1646112		31553.3	4884.72	26623.4	32922.2				442	2095584	339304	1809632	2281024		41911.7	6786.08	36192.6	45620.5				442	2733504	423792	2303360	2812928		54670.1	8475.84	46067.2	56258.6
	443	1041456	162772	813472	1003536		20829.1	3255.44	16269.4	20070.7				443	1543360	248036	1279648	1654752		30867.2	4960.72	25593	33095				443	2176896	355992	1709280	2207872		43537.9	7119.84	34185.6	44157.4				443	2786752	441136	2237568	2874880		55735	8822.72	44751.4	57497.6
	444	1029264	158272	841920	1071872		20585.3	3165.44	16838.4	21437.4				444	1634016	253712	1266240	1563744		32680.3	5074.24	25324.8	31274.9				444	2198272	330864	1758368	2166720		43965.4	6617.28	35167.4	43334.4				444	2872640	445064	2233472	2738816		57452.8	8901.28	44669.4	54776.3
	445	1007024	150140	799408	1073568		20140.5	3002.8	15988.2	21471.4				445	1515360	250976	1299264	1650912		30307.2	5019.52	25985.3	33018.2				445	2112384	327408	1715040	2310720		42247.7	6548.16	34300.8	46214.4				445	2709824	430112	2310208	2898624		54196.5	8602.24	46204.2	57972.5
	446	1019520	157464	831984	1018896		20390.4	3149.28	16639.7	20377.9				446	1596640	247224	1282496	1653088		31932.8	4944.48	25649.9	33061.8				446	2195200	336664	1784256	2205504		43904	6733.28	35685.1	44110.1				446	2813888	422616	2206848	2848128		56277.8	8452.32	44137	56962.6
	447	991920	157416	784016	1087040		19838.4	3148.32	15680.3	21740.8				447	1573664	254320	1308320	1652864		31473.3	5086.4	26166.4	33057.3				447	2239232	336152	1755008	2182720		44784.6	6723.04	35100.2	43654.4				447	2809792	447056	2261504	2838208		56195.8	8941.12	45230.1	56764.2
	448	1006080	154992	793056	1058304		20121.6	3099.84	15861.1	21166.1				448	1622144	253408	1259264	1672480		32442.9	5068.16	25185.3	33449.6				448	2128384	330616	1785344	2271296		42567.7	6612.32	35706.9	45425.9				448	2682816	422512	2281664	2934656		53656.3	8450.24	45633.3	58693.1
	449	1040256	154788	840528	986560		20805.1	3095.76	16810.6	19731.2				449	1563264	243576	1255488	1638272		31265.3	4871.52	25109.8	32765.4				449	2240960	336304	1729568	2214336		44819.2	6726.08	34591.4	44286.7				449	2842048	406808	2179008	2887360		56841	8136.16	43580.2	57747.2
	450	993744	154940	850368	1086752		19874.9	3098.8	17007.4	21735				450	1597536	239320	1258784	1631264		31950.7	4786.4	25175.7	32625.3				450	2153984	342152	1740960	2218048		43079.7	6843.04	34819.2	44361				450	2807936	438688	2319936	2859328		56158.7	8773.76	46398.7	57186.6
	451	998528	157616	800080	1061056		19970.6	3152.32	16001.6	21221.1				451	1631520	240080	1307936	1640096		32630.4	4801.6	26158.7	32801.9				451	2092448	320656	1769024	2337920		41849	6413.12	35380.5	46758.4				451	2764224	422208	2259200	2884608		55284.5	8444.16	45184	57692.2
	452	1054368	158728	834528	1031392		21087.4	3174.56	16690.6	20627.8				452	1623968	241704	1327744	1648288		32479.4	4834.08	26554.9	32965.8				452	2229440	332952	1766272	2194944		44588.8	6659.04	35325.4	43898.9				452	2826368	420984	2199488	2790784		56527.4	8419.68	43989.8	55815.7
	453	1021968	163780	818432	1077280		20439.4	3275.6	16368.6	21545.6				453	1593184	247984	1245248	1660928		31863.7	4959.68	24905	33218.6				453	2180224	338904	1785344	2168000		43604.5	6778.08	35706.9	43360				453	2720960	445168	2298304	2806400		54419.2	8903.36	45966.1	56128
	454	1007536	159740	813632	1055520		20150.7	3194.8	16272.6	21110.4				454	1594240	241752	1271968	1605888		31884.8	4835.04	25439.4	32117.8				454	2194240	337984	1722624	2242176		43884.8	6759.68	34452.5	44843.5				454	2787712	435928	2204160	2930624		55754.2	8718.56	44083.2	58612.5
	455	1044896	153728	854768	1027184		20897.9	3074.56	17095.4	20543.7				455	1546816	241044	1317888	1634464		30936.3	4820.88	26357.8	32689.3				455	2199168	336304	1758368	2167808		43983.4	6726.08	35167.4	43356.2				455	2794304	434296	2167168	2672960		55886.1	8685.92	43343.4	53459.2
	456	984688	145344	810832	1065184		19693.8	2906.88	16216.6	21303.7				456	1639072	259796	1283584	1639040		32781.4	5195.92	25671.7	32780.8				456	2177280	340168	1779232	2348800		43545.6	6803.36	35584.6	46976				456	2821632	425216	2320960	2869632		56432.6	8504.32	46419.2	57392.6
	457	1058240	157972	829408	1002704		21164.8	3159.44	16588.2	20054.1				457	1610976	255132	1262464	1643072		32219.5	5102.64	25249.3	32861.4				457	2175872	335544	1703104	2198016		43517.4	6710.88	34062.1	43960.3				457	2782208	436696	2255168	2916160		55644.2	8733.92	45103.4	58323.2
	458	1026080	149180	841984	1039168		20521.6	2983.6	16839.7	20783.4				458	1525696	244336	1267968	1641568		30513.9	4886.72	25359.4	32831.4				458	2205056	342056	1774240	2243328		44101.1	6841.12	35484.8	44866.6				458	2772544	428992	2174720	2840256		55450.9	8579.84	43494.4	56805.1
	459	967536	157164	825632	1029312		19350.7	3143.28	16512.6	20586.2				459	1621408	250572	1293632	1590688		32428.2	5011.44	25872.6	31813.8				459	2254720	341952	1833376	2188480		45094.4	6839.04	36667.5	43769.6				459	2774912	445112	2274560	2859648		55498.2	8902.24	45491.2	57193
	460	1043760	160144	811248	1040528		20875.2	3202.88	16225	20810.6				460	1571136	245756	1302016	1614656		31422.7	4915.12	26040.3	32293.1				460	2183488	330768	1725664	2220736		43669.8	6615.36	34513.3	44414.7				460	2759552	417464	2247232	2848768		55191	8349.28	44944.6	56975.4
	461	995152	172776	844832	1060800		19903	3455.52	16896.6	21216				461	1621312	247528	1290368	1643136		32426.2	4950.56	25807.4	32862.7				461	2184512	342616	1749120	2191680		43690.2	6852.32	34982.4	43833.6				461	2796672	426136	2194368	2849088		55933.4	8522.72	43887.4	56981.8
	462	1014624	157716	823344	1056416		20292.5	3154.32	16466.9	21128.3				462	1612640	241248	1275648	1638016		32252.8	4824.96	25513	32760.3				462	2121088	351160	1759168	2245696		42421.8	7023.2	35183.4	44913.9				462	2721984	450576	2295616	2855744		54439.7	9011.52	45912.3	57114.9
	463	1045376	151608	782608	1029632		20907.5	3032.16	15652.2	20592.6				463	1555712	238308	1263936	1636352		31114.2	4766.16	25278.7	32727				463	2163840	325280	1715808	2217984		43276.8	6505.6	34316.2	44359.7				463	2784640	439504	2292608	2867648		55692.8	8790.08	45852.2	57353
	464	1010880	156860	830288	1045056		20217.6	3137.2	16605.8	20901.1				464	1624544	243072	1256832	1667744		32490.9	4861.44	25136.6	33354.9				464	2162304	346176	1727712	2122944		43246.1	6923.52	34554.2	42458.9				464	2830528	436592	2139968	2824512		56610.6	8731.84	42799.4	56490.2
	465	1006080	152820	810416	1055072		20121.6	3056.4	16208.3	21101.4				465	1608864	262480	1267936	1607904		32177.3	5249.6	25358.7	32158.1				465	2068768	330464	1759232	2210112		41375.4	6609.28	35184.6	44202.2				465	2680448	418896	2338688	2864576		53609	8377.92	46773.8	57291.5
	466	1061120	156456	842032	1032496		21222.4	3129.12	16840.6	20649.9				466	1557408	242868	1296064	1677984		31148.2	4857.36	25921.3	33559.7				466	2089472	326192	1731712	2175808		41789.4	6523.84	34634.2	43516.2				466	2772992	431848	2169216	2871360		55459.8	8636.96	43384.3	57427.2
	467	1006192	153172	830288	1054240		20123.8	3063.44	16605.8	21084.8				467	1575008	241348	1295168	1631936		31500.2	4826.96	25903.4	32638.7				467	2164544	334984	1785120	2193664		43290.9	6699.68	35702.4	43873.3				467	2783936	431952	2182016	2865600		55678.7	8639.04	43640.3	57312
	468	1004880	162972	787104	1063264		20097.6	3259.44	15742.1	21265.3				468	1595840	247224	1275648	1586464		31916.8	4944.48	25513	31729.3				468	2166016	341136	1778272	2332800		43320.3	6822.72	35565.4	46656				468	2719616	422768	2250368	2888320		54392.3	8455.36	45007.4	57766.4
	469	1006400	161404	823968	1048608		20128	3228.08	16479.4	20972.2				469	1557888	258784	1304320	1675584		31157.8	5175.68	26086.4	33511.7				469	2145856	333816	1671776	2142528		42917.1	6676.32	33435.5	42850.6				469	2772032	432056	2215424	2922688		55440.6	8641.12	44308.5	58453.8
	470	1012016	159384	843680	1074016		20240.3	3187.68	16873.6	21480.3				470	1555296	248288	1270816	1572224		31105.9	4965.76	25416.3	31444.5				470	2151296	343936	1785600	2242624		43025.9	6878.72	35712	44852.5				470	2819968	422056	2264640	2819904		56399.4	8441.12	45292.8	56398.1
	471	989680	154080	783952	1025296		19793.6	3081.6	15679	20505.9				471	1597440	245756	1257056	1649024		31948.8	4915.12	25141.1	32980.5				471	2113664	325072	1765440	2287680		42273.3	6501.44	35308.8	45753.6				471	2731200	432360	2277888	2945024		54624	8647.2	45557.8	58900.5
	472	1027744	157264	818016	999632		20554.9	3145.28	16360.3	19992.6				472	1587552	244136	1299808	1670464		31751	4882.72	25996.2	33409.3				472	2217280	339816	1731232	2247744		44345.6	6796.32	34624.6	44954.9				472	2798272	422720	2192704	2797696		55965.4	8454.4	43854.1	55953.9
	473	970704	153880	836336	1064032		19414.1	3077.6	16726.7	21280.6				473	1609056	238560	1260256	1600768		32181.1	4771.2	25205.1	32015.4				473	2238528	337680	1728352	2101312		44770.6	6753.6	34567	42026.2				473	2804608	443024	2193152	2769984		56092.2	8860.48	43863	55399.7
	474	1041712	156100	813152	1047552		20834.2	3122	16263	20951				474	1591616	249052	1248608	1646368		31832.3	4981.04	24972.2	32927.4				474	2099776	332440	1723264	2244160		41995.5	6648.8	34465.3	44883.2				474	2726720	419656	2262464	2864384		54534.4	8393.12	45249.3	57287.7
	475	1012336	162216	834784	1037296		20246.7	3244.32	16695.7	20745.9				475	1524384	253664	1291584	1621984		30487.7	5073.28	25831.7	32439.7				475	2216256	337832	1706240	2146688		44325.1	6756.64	34124.8	42933.8				475	2776576	430928	2223360	2795328		55531.5	8618.56	44467.2	55906.6
	476	999728	161404	836640	1060736		19994.6	3228.08	16732.8	21214.7				476	1585824	241144	1237152	1633184		31716.5	4822.88	24743	32663.7				476	2166016	343424	1766752	2261376		43320.3	6868.48	35335	45227.5				476	2824576	439760	2264192	2811904		56491.5	8795.2	45283.8	56238.1
	477	1000976	155648	811200	1032864		20019.5	3112.96	16224	20657.3				477	1606848	251128	1258720	1649664		32137	5022.56	25174.4	32993.3				477	2232576	337168	1747680	2275264		44651.5	6743.36	34953.6	45505.3				477	2762624	428176	2281856	2935680		55252.5	8563.52	45637.1	58713.6
	478	1003280	157868	825520	1009568		20065.6	3157.36	16510.4	20191.4				478	1554784	240336	1315904	1668704		31095.7	4806.72	26318.1	33374.1				478	2201664	333000	1695040	2208064		44033.3	6660	33900.8	44161.3				478	2866176	407984	2197248	2799424		57323.5	8159.68	43945	55988.5
	479	987920	145548	859120	1008784		19758.4	2910.96	17182.4	20175.7				479	1581760	249204	1296576	1717664		31635.2	4984.08	25931.5	34353.3				479	2194496	319888	1804128	2308736		43889.9	6397.76	36082.6	46174.7				479	2817856	456040	2234688	2725504		56357.1	9120.8	44693.8	54510.1
	480	1011136	151608	824544	1032288		20222.7	3032.16	16490.9	20645.8				480	1604960	259392	1239264	1643168		32099.2	5187.84	24785.3	32863.4				480	2139840	328888	1787904	2235008		42796.8	6577.76	35758.1	44700.2				480	2655552	437360	2350912	2898752		53111	8747.2	47018.2	57975
	481	1017696	160648	823664	1047760		20353.9	3212.96	16473.3	20955.2				481	1579680	252344	1301856	1639712		31593.6	5046.88	26037.1	32794.2				481	2227840	343224	1712928	2128640		44556.8	6864.48	34258.6	42572.8				481	2752512	429552	2189120	2737600		55050.2	8591.04	43782.4	54752
	482	983696	161760	833648	1073472		19673.9	3235.2	16673	21469.4				482	1620672	246060	1272608	1647968		32413.4	4921.2	25452.2	32959.4				482	2141056	350448	1811840	2271616		42821.1	7008.96	36236.8	45432.3				482	2745856	447000	2306688	2837888		54917.1	8940	46133.8	56757.8
	483	1032032	157060	812800	1036032		20640.6	3141.2	16256	20720.6				483	1625760	252396	1339808	1602528		32515.2	5047.92	26796.2	32050.6				483	2140736	319024	1640800	2304832		42814.7	6380.48	32816	46096.6				483	2658432	426648	2288192	2880320		53168.6	8532.96	45763.8	57606.4
	484	987760	169136	811760	1032864		19755.2	3382.72	16235.2	20657.3				484	1562784	252040	1261248	1646496		31255.7	5040.8	25225	32929.9				484	2214656	345056	1772608	2232576		44293.1	6901.12	35452.2	44651.5				484	2688640	439400	2196992	2798272		53772.8	8788	43939.8	55965.4
	485	998592	150848	825152	1043808		19971.8	3016.96	16503	20876.2				485	1579296	247428	1277440	1651488		31585.9	4948.56	25548.8	33029.8				485	2122496	356040	1725664	2198080		42449.9	7120.8	34513.3	43961.6				485	2841216	444296	2273472	2866432		56824.3	8885.92	45469.4	57328.6
	486	1048896	166460	803648	1080256		20977.9	3329.2	16073	21605.1				486	1616096	236788	1285600	1639360		32321.9	4735.76	25712	32787.2				486	2136384	327872	1744576	2290432		42727.7	6557.44	34891.5	45808.6				486	2693056	408904	2250688	2938368		53861.1	8178.08	45013.8	58767.4
	487	1022128	157464	829552	1043024		20442.6	3149.28	16591	20860.5				487	1579264	242716	1286272	1637440		31585.3	4854.32	25725.4	32748.8				487	2229760	346888	1726144	2246592		44595.2	6937.76	34522.9	44931.8				487	2819520	429600	2232576	2783808		56390.4	8592	44651.5	55676.2
	488	997344	157060	792432	1050944		19946.9	3141.2	15848.6	21018.9				488	1584416	242056	1247648	1629728		31688.3	4841.12	24953	32594.6				488	2183040	322328	1774144	2245248		43660.8	6446.56	35482.9	44905				488	2777216	435984	2324352	2773888		55544.3	8719.68	46487	55477.8
	489	1010880	157464	799152	1023472		20217.6	3149.28	15983	20469.4				489	1607200	250316	1259744	1562688		32144	5006.32	25194.9	31253.8				489	2140672	335800	1649984	2229632		42813.4	6716	32999.7	44592.6				489	2743104	424760	2220224	2939136		54862.1	8495.2	44404.5	58782.7
	490	1012640	159488	848400	1059904		20252.8	3189.76	16968	21198.1				490	1578336	246568	1297120	1660768		31566.7	4931.36	25942.4	33215.4				490	2255040	347136	1742912	2147648		45100.8	6942.72	34858.2	42953				490	2812864	442664	2161408	2761472		56257.3	8853.28	43228.2	55229.4
	491	995728	155040	824800	1065088		19914.6	3100.8	16496	21301.8				491	1612480	239980	1250752	1630624		32249.6	4799.6	25015	32612.5				491	2178304	329496	1779808	2259840		43566.1	6589.92	35596.2	45196.8				491	2797696	428072	2193664	2899456		55953.9	8561.44	43873.3	57989.1
	492	1019408	160040	828368	1029008		20388.2	3200.8	16567.4	20580.2				492	1636032	251228	1278112	1706016		32720.6	5024.56	25562.2	34120.3				492	2196736	331784	1652704	2147648		43934.7	6635.68	33054.1	42953				492	2718144	428536	2240192	2893248		54362.9	8570.72	44803.8	57865
	493	996608	158828	851920	1025872		19932.2	3176.56	17038.4	20517.4				493	1575200	244896	1291264	1654944		31504	4897.92	25825.3	33098.9				493	2238784	336408	1798336	2159680		44775.7	6728.16	35966.7	43193.6				493	2860736	430320	2181312	2872064		57214.7	8606.4	43626.2	57441.3
	494	975952	155292	795792	1058144		19519	3105.84	15915.8	21162.9				494	1610976	241752	1259104	1588928		32219.5	4835.04	25182.1	31778.6				494	2114752	350040	1797472	2286656		42295	7000.8	35949.4	45733.1				494	2775616	433840	2246912	2856064		55512.3	8676.8	44938.2	57121.3
	495	1036032	162620	836496	1057984		20720.6	3252.4	16729.9	21159.7				495	1590784	243224	1338080	1619392		31815.7	4864.48	26761.6	32387.8				495	2186752	337120	1722720	2174912		43735	6742.4	34454.4	43498.2				495	2789440	417616	2189440	2864832		55788.8	8352.32	43788.8	57296.6
	496	994832	156504	810880	1041936		19896.6	3130.08	16217.6	20838.7				496	1548416	246720	1286272	1644736		30968.3	4934.4	25725.4	32894.7				496	2230912	345512	1770304	2200960		44618.2	6910.24	35406.1	44019.2				496	2841024	438888	2187008	2849600		56820.5	8777.76	43740.2	56992
	497	1025200	153728	816464	1093120		20504	3074.56	16329.3	21862.4				497	1588928	253968	1239840	1637952		31778.6	5079.36	24796.8	32759				497	2141248	331888	1777344	2232320		42825	6637.76	35546.9	44646.4				497	2724544	429400	2274176	2927168		54490.9	8588	45483.5	58543.4
	498	1028528	154688	810000	1001296		20570.6	3093.76	16200	20025.9				498	1541984	251836	1300416	1627648		30839.7	5036.72	26008.3	32553				498	2130496	334176	1660928	2195904		42609.9	6683.52	33218.6	43918.1				498	2823680	407424	2283456	2826176		56473.6	8148.48	45669.1	56523.5
	499	1035520	164236	845808	1052352		20710.4	3284.72	16916.2	21047				499	1486272	241704	1328736	1675904		29725.4	4834.08	26574.7	33518.1				499	2178432	337528	1751424	2282752		43568.6	6750.56	35028.5	45655				499	2788800	433936	2281088	2767296		55776	8678.72	45621.8	55345.9
	500	1027184	156356	825776	1069728		20543.7	3127.12	16515.5	21394.6				500	1606560	253308	1296224	1600672		32131.2	5066.16	25924.5	32013.4				500	2138432	333056	1750464	2284032		42768.6	6661.12	35009.3	45680.6				500	2682752	432920	2283648	2890368		53655	8658.4	45673	57807.4
	501	1066944	153224	814352	1059904		21338.9	3064.48	16287	21198.1				501	1592576	239880	1291232	1687936		31851.5	4797.6	25824.6	33758.7				501	2200768	334328	1712256	2232896		44015.4	6686.56	34245.1	44657.9				501	2719232	430576	2227840	2793984		54384.6	8611.52	44556.8	55879.7
	502	978656	154032	828928	1062112		19573.1	3080.64	16578.6	21242.2				502	1564896	244996	1282592	1642816		31297.9	4899.92	25651.8	32856.3				502	2171648	343120	1758208	2224960		43433	6862.4	35164.2	44499.2				502	2808768	439912	2268352	2820352		56175.4	8798.24	45367	56407
	503	1006288	151304	807104	1041200		20125.8	3026.08	16142.1	20824				503	1568032	242920	1284960	1592960		31360.6	4858.4	25699.2	31859.2				503	2115648	314504	1776352	2344128		42313	6290.08	35527	46882.6				503	2819648	416704	2213184	2920384		56393	8334.08	44263.7	58407.7
	504	1044592	158780	835360	1041824		20891.8	3175.6	16707.2	20836.5				504	1588864	244692	1314432	1632800		31777.3	4893.84	26288.6	32656				504	2204864	327968	1692544	2211136		44097.3	6559.36	33850.9	44222.7				504	2765184	445272	2215488	2848320		55303.7	8905.44	44309.8	56966.4
	505	1000560	156404	861760	1038384		20011.2	3128.08	17235.2	20767.7				505	1594560	246212	1296256	1667200		31891.2	4924.24	25925.1	33344				505	2082784	337120	1729152	2246912		41655.7	6742.4	34583	44938.2				505	2803456	435008	2259200	2831232		56069.1	8700.16	45184	56624.6
	506	1007024	157112	795584	1047296		20140.5	3142.24	15911.7	20945.9				506	1646752	247984	1240736	1643232		32935	4959.68	24814.7	32864.6				506	2135488	337832	1673600	2241920		42709.8	6756.64	33472	44838.4				506	2793536	437512	2230912	2926976		55870.7	8750.24	44618.2	58539.5
	507	1016752	151960	836176	1023376		20335	3039.2	16723.5	20467.5				507	1565984	258328	1328992	1612736		31319.7	5166.56	26579.8	32254.7				507	2202880	336152	1691840	2215168		44057.6	6723.04	33836.8	44303.4				507	2858496	417520	2199168	2865024		57169.9	8350.4	43983.4	57300.5
	508	1004528	153928	832816	1057504		20090.6	3078.56	16656.3	21150.1				508	1555200	240792	1287904	1649184		31104	4815.84	25758.1	32983.7				508	2139520	342512	1780768	2218496		42790.4	6850.24	35615.4	44369.9				508	2820352	446088	2231360	2854464		56407	8921.76	44627.2	57089.3
	509	997184	156808	788704	1054688		19943.7	3136.16	15774.1	21093.8				509	1640032	239068	1280640	1598816		32800.6	4781.36	25612.8	31976.3				509	2169024	341392	1709760	2320000		43380.5	6827.84	34195.2	46400				509	2672512	432712	2228352	2876224		53450.2	8654.24	44567	57524.5
	510	968992	155596	836080	1040672		19379.8	3111.92	16721.6	20813.4				510	1549664	241704	1335072	1638752		30993.3	4834.08	26701.4	32775				510	2148288	335592	1773280	2151552		42965.8	6711.84	35465.6	43031				510	2871552	426800	2209984	2780992		57431	8536	44199.7	55619.8
	511	1007392	155800	828064	1080736		20147.8	3116	16561.3	21614.7				511	1612256	240080	1275808	1625568		32245.1	4801.6	25516.2	32511.4				511	2118080	329296	1804288	2259392		42361.6	6585.92	36085.8	45187.8				511	2739712	438432	2262848	2884352		54794.2	8768.64	45257	57687
	512	1018736	152516	803024	1037552		20374.7	3050.32	16060.5	20751				512	1631456	249860	1277760	1619456		32629.1	4997.2	25555.2	32389.1				512	2150272	335544	1708800	2264768		43005.4	6710.88	34176	45295.4				512	2740992	424456	2262400	2910592		54819.8	8489.12	45248	58211.8
	513	989120	157972	861296	1051680		19782.4	3159.44	17225.9	21033.6				513	1592576	248492	1306464	1656288		31851.5	4969.84	26129.3	33125.8				513	2246464	342456	1759648	2190912		44929.3	6849.12	35193	43818.2				513	2767104	418232	2208064	2868800		55342.1	8364.64	44161.3	57376
	514	980320	151960	819888	1083616		19606.4	3039.2	16397.8	21672.3				514	1601792	240336	1293728	1616928		32035.8	4806.72	25874.6	32338.6				514	2155072	344240	1765440	2232000		43101.4	6884.8	35308.8	44640				514	2732480	444352	2173184	2815104		54649.6	8887.04	43463.7	56302.1
	515	1023424	159232	788608	1016912		20468.5	3184.64	15772.2	20338.2				515	1637216	256044	1290912	1620096		32744.3	5120.88	25818.2	32401.9				515	2209920	347752	1739680	2244800		44198.4	6955.04	34793.6	44896				515	2682944	426696	2210304	2868416		53658.9	8533.92	44206.1	57368.3
	516	1030144	166356	818016	1088512		20602.9	3327.12	16360.3	21770.2				516	1587232	247376	1276288	1661888		31744.6	4947.52	25525.8	33237.8				516	2171712	345616	1744256	2168768		43434.2	6912.32	34885.1	43375.4				516	2809344	429248	2223872	2832128		56186.9	8584.96	44477.4	56642.6
	517	970656	155848	813312	1069920		19413.1	3116.96	16266.2	21398.4				517	1582432	243984	1227712	1670560		31648.6	4879.68	24554.2	33411.2				517	2087968	342560	1763840	2192256		41759.4	6851.2	35276.8	43845.1				517	2819968	427152	2297728	2740160		56399.4	8543.04	45954.6	54803.2
	518	1042768	160296	815328	1032032		20855.4	3205.92	16306.6	20640.6				518	1614720	250420	1296480	1610464		32294.4	5008.4	25929.6	32209.3				518	2204864	321160	1767072	2128640		44097.3	6423.2	35341.4	42572.8				518	2722240	429040	2181568	2901504		54444.8	8580.8	43631.4	58030.1
	519	1021296	159384	838256	1081472		20425.9	3187.68	16765.1	21629.4				519	1589920	241856	1313888	1644096		31798.4	4837.12	26277.8	32881.9				519	2189568	334832	1729664	2167744		43791.4	6696.64	34593.3	43354.9				519	2736704	425984	2206464	2852736		54734.1	8519.68	44129.3	57054.7
	520	1002288	156052	828416	1079520		20045.8	3121.04	16568.3	21590.4				520	1632000	237396	1264576	1595616		32640	4747.92	25291.5	31912.3				520	2103744	337072	1734336	2272448		42074.9	6741.44	34686.7	45449				520	2779264	445064	2305152	2891584		55585.3	8901.28	46103	57831.7
	521	1041872	153224	811248	1025824		20837.4	3064.48	16225	20516.5				521	1629248	246872	1304064	1599008		32585	4937.44	26081.3	31980.2				521	2204160	333816	1720704	2241216		44083.2	6676.32	34414.1	44824.3				521	2712896	417672	2228096	2867712		54257.9	8353.44	44561.9	57354.2
	522	1006400	156052	836080	1042912		20128	3121.04	16721.6	20858.2				522	1557120	238916	1293120	1695584		31142.4	4778.32	25862.4	33911.7				522	2205568	341288	1808448	2200192		44111.4	6825.76	36169	44003.8				522	2792768	442056	2291776	2838080		55855.4	8841.12	45835.5	56761.6
	523	1018272	153576	812384	1046144		20365.4	3071.52	16247.7	20922.9				523	1564736	252192	1277920	1559008		31294.7	5043.84	25558.4	31180.2				523	2166016	321112	1811840	2207808		43320.3	6422.24	36236.8	44156.2				523	2722240	424608	2291392	2902656		54444.8	8492.16	45827.8	58053.1
	524	1055072	160040	792736	1019472		21101.4	3200.8	15854.7	20389.4				524	1604288	244592	1292256	1654464		32085.8	4891.84	25845.1	33089.3				524	2157248	329496	1730944	2188416		43145	6589.92	34618.9	43768.3				524	2703296	417360	2260160	2863424		54065.9	8347.2	45203.2	57268.5
	525	1005248	159384	865744	1067680		20105	3187.68	17314.9	21353.6				525	1569568	243528	1282432	1673824		31391.4	4870.56	25648.6	33476.5				525	2250624	343936	1785056	2205568		45012.5	6878.72	35701.1	44111.4				525	2895360	428584	2209344	2883584		57907.2	8571.68	44186.9	57671.7
	526	1003952	154636	807632	1039472		20079	3092.72	16152.6	20789.4				526	1674976	260404	1296256	1617056		33499.5	5208.08	25925.1	32341.1				526	2141440	326904	1766752	2267520		42828.8	6538.08	35335	45350.4				526	2782144	410432	2201216	2866496		55642.9	8208.64	44024.3	57329.9
	527	1049888	156708	801520	1027600		20997.8	3134.16	16030.4	20552				527	1575840	248036	1312896	1609696		31516.8	4960.72	26257.9	32193.9				527	2258496	320960	1705440	2161728		45169.9	6419.2	34108.8	43234.6				527	2731456	423736	2186688	2899008		54629.1	8474.72	43733.8	57980.2
	528	982928	150696	823600	1061984		19658.6	3013.92	16472	21239.7				528	1578880	234408	1264896	1617056		31577.6	4688.16	25297.9	32341.1				528	2142336	340072	1777824	2202944		42846.7	6801.44	35556.5	44058.9				528	2798656	429856	2219456	2887104		55973.1	8597.12	44389.1	57742.1
	529	984272	148728	803536	1035776		19685.4	2974.56	16070.7	20715.5				529	1660960	240080	1278016	1615872		33219.2	4801.6	25560.3	32317.4				529	2135488	336816	1721728	2204672		42709.8	6736.32	34434.6	44093.4				529	2833728	419912	2279616	2910720		56674.6	8398.24	45592.3	58214.4
	530	1012176	161104	787312	1006912		20243.5	3222.08	15746.2	20138.2				530	1560864	250216	1280704	1646048		31217.3	5004.32	25614.1	32921				530	2219200	335496	1709760	2207488		44384	6709.92	34195.2	44149.8				530	2716800	422824	2224576	2861248		54336	8456.48	44491.5	57225
	531	1011088	160244	849952	1041040		20221.8	3204.88	16999	20820.8				531	1541088	240640	1233536	1630976		30821.8	4812.8	24670.7	32619.5				531	2117888	334680	1758528	2247552		42357.8	6693.6	35170.6	44951				531	2703744	414104	2228544	2878080		54074.9	8282.08	44570.9	57561.6
	532	1013120	156556	787824	1037296		20262.4	3131.12	15756.5	20745.9				532	1623488	246160	1276288	1584416		32469.8	4923.2	25525.8	31688.3				532	2115008	334784	1723968	2276800		42300.2	6695.68	34479.4	45536				532	2786752	429248	2231296	2799168		55735	8584.96	44625.9	55983.4
	533	1032656	155140	818800	1024464		20653.1	3102.8	16376	20489.3				533	1524992	242816	1340160	1643136		30499.8	4856.32	26803.2	32862.7				533	2149696	333360	1750688	2221440		42993.9	6667.2	35013.8	44428.8				533	2709632	426800	2220736	2720704		54192.6	8536	44414.7	54414.1
	534	1006560	158124	832720	1045008		20131.2	3162.48	16654.4	20900.2				534	1595680	244844	1265184	1662880		31913.6	4896.88	25303.7	33257.6				534	2147456	338240	1766400	2203776		42949.1	6764.8	35328	44075.5				534	2736064	423280	2235712	2832320		54721.3	8465.6	44714.2	56646.4
	535	1009152	154992	814864	1018944		20183	3099.84	16297.3	20378.9				535	1623744	254576	1289952	1607680		32474.9	5091.52	25799	32153.6				535	2168960	328632	1723744	2199872		43379.2	6572.64	34474.9	43997.4				535	2794752	428072	2196928	2898496		55895	8561.44	43938.6	57969.9
	536	1021440	157112	819152	1044896		20428.8	3142.24	16383	20897.9				536	1584096	249860	1302208	1668544		31681.9	4997.2	26044.2	33370.9				536	2192384	340224	1702464	2183616		43847.7	6804.48	34049.3	43672.3				536	2779200	431184	2246272	2862784		55584	8623.68	44925.4	57255.7
	537	983808	158576	822368	1085216		19676.2	3171.52	16447.4	21704.3				537	1538688	242360	1294752	1665120		30773.8	4847.2	25895	33302.4				537	2137472	334576	1810880	2235776		42749.4	6691.52	36217.6	44715.5				537	2770752	426088	2232960	2915776		55415	8521.76	44659.2	58315.5
	538	1031456	148928	804160	1050560		20629.1	2978.56	16083.2	21011.2				538	1622752	247276	1256576	1614080		32455	4945.52	25131.5	32281.6				538	2134080	322176	1761376	2248448		42681.6	6443.52	35227.5	44969				538	2695360	442616	2227520	2839552		53907.2	8852.32	44550.4	56791
	539	1061888	159080	834736	1014784		21237.8	3181.6	16694.7	20295.7				539	1561504	242160	1322464	1664640		31230.1	4843.2	26449.3	33292.8				539	2194368	341592	1768704	2161728		43887.4	6831.84	35374.1	43234.6				539	2693184	420320	2192960	2866624		53863.7	8406.4	43859.2	57332.5
	540	995152	154888	845088	1054368		19903	3097.76	16901.8	21087.4				540	1589088	239776	1278656	1679456		31781.8	4795.52	25573.1	33589.1				540	2150784	338192	1747264	2288064		43015.7	6763.84	34945.3	45761.3				540	2760320	422512	2258688	2807936		55206.4	8450.24	45173.8	56158.7
	541	1058400	155192	824384	1028592		21168	3103.84	16487.7	20571.8				541	1589824	252752	1248928	1588704		31796.5	5055.04	24978.6	31774.1				541	2134912	319328	1729568	2235456		42698.2	6386.56	34591.4	44709.1				541	2748416	429352	2270464	2799680		54968.3	8587.04	45409.3	55993.6
	542	1000000	155344	825680	1005664		20000	3106.88	16513.6	20113.3				542	1537952	245808	1292384	1689504		30759	4916.16	25847.7	33790.1				542	2185472	327056	1740512	2202368		43709.4	6541.12	34810.2	44047.4				542	2778176	422056	2223232	2877824		55563.5	8441.12	44464.6	57556.5
	543	994000	150648	788656	1077536		19880	3012.96	15773.1	21550.7				543	1604352	236080	1265344	1576128		32087	4721.6	25306.9	31522.6				543	2186368	338392	1772864	2276160		43727.4	6767.84	35457.3	45523.2				543	2754624	432816	2256000	2887168		55092.5	8656.32	45120	57743.4
	544	1025248	150040	820096	1047504		20505	3000.8	16401.9	20950.1				544	1627680	250420	1254176	1595232		32553.6	5008.4	25083.5	31904.6				544	2155712	333768	1720064	2217088		43114.2	6675.36	34401.3	44341.8				544	2818176	430320	2232064	2846528		56363.5	8606.4	44641.3	56930.6
	545	1025616	155800	833184	1015360		20512.3	3116	16663.7	20307.2				545	1542304	250876	1314464	1671840		30846.1	5017.52	26289.3	33436.8				545	2154688	351720	1740192	2262784		43093.8	7034.4	34803.8	45255.7				545	2736064	431952	2202816	2809152		54721.3	8639.04	44056.3	56183
	546	998224	147768	830384	1039680		19964.5	2955.36	16607.7	20793.6				546	1597152	239828	1257120	1599072		31943	4796.56	25142.4	31981.4				546	2165952	332440	1769440	2232192		43319	6648.8	35388.8	44643.8				546	2902336	421440	2180096	2819072		58046.7	8428.8	43601.9	56381.4
	547	1069568	160596	834160	1019056		21391.4	3211.92	16683.2	20381.1				547	1591328	260052	1264896	1641728		31826.6	5201.04	25297.9	32834.6				547	2175936	326192	1720064	2233408		43518.7	6523.84	34401.3	44668.2				547	2788224	439192	2347520	2854592		55764.5	8783.84	46950.4	57091.8
	548	965760	157312	813104	1068480		19315.2	3146.24	16262.1	21369.6				548	1515104	247732	1303200	1719424		30302.1	4954.64	26064	34388.5				548	2186624	313440	1737792	2198464		43732.5	6268.8	34755.8	43969.3				548	2766976	421288	2217856	2891712		55339.5	8425.76	44357.1	57834.2
	549	992192	155444	817760	1072224		19843.8	3108.88	16355.2	21444.5				549	1623712	240840	1290944	1636992		32474.2	4816.8	25818.9	32739.8				549	2190144	329800	1795072	2282176		43802.9	6596	35901.4	45643.5				549	2811840	426184	2269120	2798720		56236.8	8523.68	45382.4	55974.4
	550	1049728	161860	821328	1049888		20994.6	3237.2	16426.6	20997.8				550	1557696	254220	1313216	1620416		31153.9	5084.4	26264.3	32408.3				550	2240576	325072	1781056	2210432		44811.5	6501.44	35621.1	44208.6				550	2730432	441440	2287168	2827712		54608.6	8828.8	45743.4	56554.2
	551	985216	161960	843328	1065952		19704.3	3239.2	16866.6	21319				551	1551840	240892	1311360	1698176		31036.8	4817.84	26227.2	33963.5				551	2136448	326040	1724288	2211584		42729	6520.8	34485.8	44231.7				551	2723520	439504	2267392	2834240		54470.4	8790.08	45347.8	56684.8
	552	998944	154688	795792	1038016		19978.9	3093.76	15915.8	20760.3				552	1627840	242312	1306048	1616768		32556.8	4846.24	26121	32335.4				552	2129152	333968	1790688	2165504		42583	6679.36	35813.8	43310.1				552	2735104	423688	2231680	2900160		54702.1	8473.76	44633.6	58003.2
	553	1035472	157112	825008	1048128		20709.4	3142.24	16500.2	20962.6				553	1555296	248392	1296320	1632864		31105.9	4967.84	25926.4	32657.3				553	2128640	328480	1752608	2178880		42572.8	6569.6	35052.2	43577.6				553	2739968	428840	2276736	2815232		54799.4	8576.8	45534.7	56304.6
	554	982560	162364	827120	1086272		19651.2	3247.28	16542.4	21725.4				554	1578400	240792	1317696	1684640		31568	4815.84	26353.9	33692.8				554	2136320	333664	1745856	2258944		42726.4	6673.28	34917.1	45178.9				554	2740160	422360	2218304	2864192		54803.2	8447.2	44366.1	57283.8
	555	1016400	162620	793520	1055008		20328	3252.4	15870.4	21100.2				555	1674304	242816	1209088	1613120		33486.1	4856.32	24181.8	32262.4				555	2129920	337832	1804000	2174528		42598.4	6756.64	36080	43490.6				555	2814272	445728	2259712	2857408		56285.4	8914.56	45194.2	57148.2
	556	1050208	150696	827024	1009424		21004.2	3013.92	16540.5	20188.5				556	1559712	271864	1284224	1647616		31194.2	5437.28	25684.5	32952.3				556	2097216	341288	1759648	2234560		41944.3	6825.76	35193	44691.2				556	2791488	442664	2350528	2872704		55829.8	8853.28	47010.6	57454.1
	557	1013536	152968	845440	1047552		20270.7	3059.36	16908.8	20951				557	1555520	236080	1247552	1714240		31110.4	4721.6	24951	34284.8				557	2180864	354720	1759808	2234496		43617.3	7094.4	35196.2	44689.9				557	2791040	418896	2292800	2842944		55820.8	8377.92	45856	56858.9
	558	987296	144740	828208	1089024		19745.9	2894.8	16564.2	21780.5				558	1601504	239424	1238528	1606688		32030.1	4788.48	24770.6	32133.8				558	2147648	333968	1787424	2294272		42953	6679.36	35748.5	45885.4				558	2811328	436848	2223552	2873472		56226.6	8736.96	44471	57469.4
	559	1002432	157972	824480	1026288		20048.6	3159.44	16489.6	20525.8				559	1568256	244896	1336736	1651232		31365.1	4897.92	26734.7	33024.6				559	2193024	334784	1762272	2283264		43860.5	6695.68	35245.4	45665.3				559	2821376	404872	2253120	2835008		56427.5	8097.44	45062.4	56700.2
	560	990368	153324	836128	1053600		19807.4	3066.48	16722.6	21072				560	1532800	246264	1291808	1685760		30656	4925.28	25836.2	33715.2				560	2172416	339768	1761472	2199040		43448.3	6795.36	35229.4	43980.8				560	2719040	423840	2222848	2821440		54380.8	8476.8	44457	56428.8
	561	1022336	154232	834320	1036448		20446.7	3084.64	16686.4	20729				561	1647616	242968	1262304	1581632		32952.3	4859.36	25246.1	31632.6				561	2104640	335952	1724224	2196864		42092.8	6719.04	34484.5	43937.3				561	2741632	431952	2252992	2815296		54832.6	8639.04	45059.8	56305.9
	562	1019520	154384	841824	1062528		20390.4	3087.68	16836.5	21250.6				562	1577280	242664	1320576	1641888		31545.6	4853.28	26411.5	32837.8				562	2162112	322632	1722560	2254976		43242.2	6452.64	34451.2	45099.5				562	2732288	433888	2280064	2838656		54645.8	8677.76	45601.3	56773.1
	563	994272	162568	827376	1057312		19885.4	3251.36	16547.5	21146.2				563	1517312	237904	1213632	1612320		30346.2	4758.08	24272.6	32246.4				563	2201792	342408	1718784	2130880		44035.8	6848.16	34375.7	42617.6				563	2715136	420472	2215616	2916032		54302.7	8409.44	44312.3	58320.6
	564	1003696	142668	813360	1019264		20073.9	2853.36	16267.2	20385.3				564	1637952	255640	1245280	1593440		32759	5112.8	24905.6	31868.8				564	2097920	329448	1779392	2205696		41958.4	6588.96	35587.8	44113.9				564	2804992	429704	2232896	2780608		56099.8	8594.08	44657.9	55612.2
	565	993328	157820	845600	1019312		19866.6	3156.4	16912	20386.2				565	1534656	243476	1321056	1620096		30693.1	4869.52	26421.1	32401.9				565	2115904	342864	1724032	2235904		42318.1	6857.28	34480.6	44718.1				565	2709312	419048	2292672	2782464		54186.2	8380.96	45853.4	55649.3
	566	1000304	155344	839696	1068576		20006.1	3106.88	16793.9	21371.5				566	1576608	239524	1259104	1658048		31532.2	4790.48	25182.1	33161				566	2177536	328376	1714560	2255104		43550.7	6567.52	34291.2	45102.1				566	2808512	422920	2220032	2800704		56170.2	8458.4	44400.6	56014.1
	567	1024112	158932	826400	1085376		20482.2	3178.64	16528	21707.5				567	1604864	235724	1262880	1557632		32097.3	4714.48	25257.6	31152.6				567	2142528	331224	1694880	2243904		42850.6	6624.48	33897.6	44878.1				567	2800896	434352	2243456	2716992		56017.9	8687.04	44869.1	54339.8
	568	996928	158124	844976	1039216		19938.6	3162.48	16899.5	20784.3				568	1553696	254624	1301696	1694464		31073.9	5092.48	26033.9	33889.3				568	2179008	339616	1735232	2291904		43580.2	6792.32	34704.6	45838.1				568	2734080	425928	2270912	2850304		54681.6	8518.56	45418.2	57006.1
	569	1016704	159384	816992	1057664		20334.1	3187.68	16339.8	21153.3				569	1571712	242968	1304832	1658560		31434.2	4859.36	26096.6	33171.2				569	2238656	336056	1794688	2199360		44773.1	6721.12	35893.8	43987.2				569	2794944	425728	2208576	2882624		55898.9	8514.56	44171.5	57652.5
	570	1042192	157112	795376	1056896		20843.8	3142.24	15907.5	21137.9				570	1647648	246516	1332160	1604928		32953	4930.32	26643.2	32098.6				570	2150080	347392	1754368	2240256		43001.6	6947.84	35087.4	44805.1				570	2768448	439600	2178880	2808064		55369	8792	43577.6	56161.3
	571	1014464	155292	795632	1051680		20289.3	3105.84	15912.6	21033.6				571	1518752	245148	1305792	1633536		30375	4902.96	26115.8	32670.7				571	2132416	333208	1720064	2198144		42648.3	6664.16	34401.3	43962.9				571	2701632	442920	2248384	2868032		54032.6	8858.4	44967.7	57360.6
	572	983552	152464	832864	1065760		19671	3049.28	16657.3	21315.2				572	1601152	239120	1240608	1626400		32023	4782.4	24812.2	32528				572	2180608	337376	1781792	2172096		43612.2	6747.52	35635.8	43441.9				572	2793536	406760	2215808	2949696		55870.7	8135.2	44316.2	58993.9
	573	1025088	160444	805248	1054496		20501.8	3208.88	16105	21089.9				573	1693856	243780	1305152	1572288		33877.1	4875.6	26103	31445.8				573	2121856	350952	1692256	2239424		42437.1	7019.04	33845.1	44788.5				573	2749056	436184	2200256	2811264		54981.1	8723.68	44005.1	56225.3
	574	1011088	155900	827904	1055360		20221.8	3118	16558.1	21107.2				574	1587424	250468	1248640	1724512		31748.5	5009.36	24972.8	34490.2				574	2203584	336920	1691136	2188736		44071.7	6738.4	33822.7	43774.7				574	2800704	428072	2295040	2942272		56014.1	8561.44	45900.8	58845.4
	575	1022592	159184	819888	1052768		20451.8	3183.68	16397.8	21055.4				575	1614240	241096	1251840	1619776		32284.8	4821.92	25036.8	32395.5				575	2149696	332040	1787616	2190208		42993.9	6640.8	35752.3	43804.2				575	2824064	425928	2182912	2769984		56481.3	8518.56	43658.2	55399.7
	576	1025984	160748	821328	1032288		20519.7	3214.96	16426.6	20645.8				576	1640960	246768	1296000	1606720		32819.2	4935.36	25920	32134.4				576	2156544	329296	1770400	2183616		43130.9	6585.92	35408	43672.3				576	2731200	447872	2224768	2829184		54624	8957.44	44495.4	56583.7
	577	1001456	167064	818128	1057312		20029.1	3341.28	16362.6	21146.2				577	1616352	249660	1271296	1646816		32327	4993.2	25425.9	32936.3				577	2171520	319280	1727968	2212096		43430.4	6385.6	34559.4	44241.9				577	2813824	432920	2250496	2897984		56276.5	8658.4	45009.9	57959.7
	578	1017600	152160	797232	1084608		20352	3043.2	15944.6	21692.2				578	1598368	240688	1254272	1627584		31967.4	4813.76	25085.4	32551.7				578	2168448	338136	1759328	2163840		43369	6762.72	35186.6	43276.8				578	2759552	435576	2179712	2776704		55191	8711.52	43594.2	55534.1
	579	1038064	158576	830432	1054176		20761.3	3171.52	16608.6	21083.5				579	1566560	255032	1285920	1592224		31331.2	5100.64	25718.4	31844.5				579	2195968	352072	1723168	2253120		43919.4	7041.44	34463.4	45062.4				579	2775744	412264	2300864	2851328		55514.9	8245.28	46017.3	57026.6
	580	1007696	160548	805552	1042032		20153.9	3210.96	16111	20840.6				580	1565120	236888	1274304	1706016		31302.4	4737.76	25486.1	34120.3				580	2142784	325024	1717600	2201856		42855.7	6500.48	34352	44037.1				580	2767808	425064	2303232	2912128		55356.2	8501.28	46064.6	58242.6
	581	1013744	152516	825728	1097088		20274.9	3050.32	16514.6	21941.8				581	1583776	254828	1238112	1583936		31675.5	5096.56	24762.2	31678.7				581	2221248	334832	1701280	2179968		44425	6696.64	34025.6	43599.4				581	2825728	408392	2186816	2768832		56514.6	8167.84	43736.3	55376.6
	582	1010816	159284	787056	1035984		20216.3	3185.68	15741.1	20719.7				582	1539328	250316	1290048	1640800		30786.6	5006.32	25801	32816				582	2103552	328176	1782592	2216000		42071	6563.52	35651.8	44320				582	2737664	450632	2246144	2836544		54753.3	9012.64	44922.9	56730.9
	583	994624	157364	829808	1040576		19892.5	3147.28	16596.2	20811.5				583	1560128	246416	1335392	1687936		31202.6	4928.32	26707.8	33758.7				583	2149120	329544	1765120	2235136		42982.4	6590.88	35302.4	44702.7				583	2680192	425728	2210496	2909376		53603.8	8514.56	44209.9	58187.5
	584	1005568	161152	820608	1047136		20111.4	3223.04	16412.2	20942.7				584	1621472	252496	1264832	1610240		32429.4	5049.92	25296.6	32204.8				584	2139072	350800	1788480	2197056		42781.4	7016	35769.6	43941.1				584	2696832	428784	2195200	2784704		53936.6	8575.68	43904	55694.1
	585	1006816	153928	808864	1034624		20136.3	3078.56	16177.3	20692.5				585	1548672	245400	1315840	1656704		30973.4	4908	26316.8	33134.1				585	2121152	327920	1777184	2283392		42423	6558.4	35543.7	45667.8				585	2783168	403192	2302272	2934272		55663.4	8063.84	46045.4	58685.4
	586	1013120	155596	859792	1031136		20262.4	3111.92	17195.8	20622.7				586	1578304	239168	1294208	1685376		31566.1	4783.36	25884.2	33707.5				586	2217472	326904	1735488	2220352		44349.4	6538.08	34709.8	44407				586	2676480	445064	2283840	2880448		53529.6	8901.28	45676.8	57609
	587	1029520	156708	826912	1054816		20590.4	3134.16	16538.2	21096.3				587	1644192	245504	1256416	1593120		32883.8	4910.08	25128.3	31862.4				587	2128064	344952	1771200	2201856		42561.3	6899.04	35424	44037.1				587	2872064	437304	2223680	2847488		57441.3	8746.08	44473.6	56949.8
	588	1028944	149636	832928	1033856		20578.9	2992.72	16658.6	20677.1				588	1597760	252396	1331744	1680704		31955.2	5047.92	26634.9	33614.1				588	2074336	334120	1766112	2253824		41486.7	6682.4	35322.2	45076.5				588	2798016	429856	2296192	2915008		55960.3	8597.12	45923.8	58300.2
	589	996240	152160	826448	1048240		19924.8	3043.2	16529	20964.8				589	1517696	235116	1262688	1612416		30353.9	4702.32	25253.8	32248.3				589	2199360	334120	1744032	2255360		43987.2	6682.4	34880.6	45107.2				589	2721280	417720	2194176	2973440		54425.6	8354.4	43883.5	59468.8
	590	1008432	154184	789168	1064352		20168.6	3083.68	15783.4	21287				590	1635872	250824	1232960	1592736		32717.4	5016.48	24659.2	31854.7				590	2172544	343072	1771328	2151488		43450.9	6861.44	35426.6	43029.8				590	2820736	428632	2272704	2836928		56414.7	8572.64	45454.1	56738.6
	591	1016656	164236	831728	1020768		20333.1	3284.72	16634.6	20415.4				591	1570208	243476	1305312	1597792		31404.2	4869.52	26106.2	31955.8				591	2115968	340680	1756384	2247744		42319.4	6813.6	35127.7	44954.9				591	2745984	412216	2220928	2925504		54919.7	8244.32	44418.6	58510.1
	592	1025824	153324	806752	1072576		20516.5	3066.48	16135	21451.5				592	1567360	230508	1276960	1674016		31347.2	4610.16	25539.2	33480.3				592	2189696	331376	1700096	2226304		43793.9	6627.52	34001.9	44526.1				592	2786496	420272	2200320	2846272		55729.9	8405.44	44006.4	56925.4
	593	1039744	159284	806224	1044320		20794.9	3185.68	16124.5	20886.4				593	1632096	239120	1264672	1615040		32641.9	4782.4	25293.4	32300.8				593	2205952	344648	1717600	2197504		44119	6892.96	34352	43950.1				593	2821824	450784	2235776	2842304		56436.5	9015.68	44715.5	56846.1
	594	994832	156908	814608	1022176		19896.6	3138.16	16292.2	20443.5				594	1616608	250468	1307200	1624224		32332.2	5009.36	26144	32484.5				594	2148352	339560	1708224	2250624		42967	6791.2	34164.5	45012.5				594	2698880	410224	2248384	2803584		53977.6	8204.48	44967.7	56071.7
	595	995568	157112	828320	1037088		19911.4	3142.24	16566.4	20741.8				595	1583136	239424	1253536	1592256		31662.7	4788.48	25070.7	31845.1				595	2194176	319080	1765152	2186496		43883.5	6381.6	35303	43729.9				595	2742848	422056	2155904	2840384		54857	8441.12	43118.1	56807.7
	596	986512	158072	809440	1024992		19730.2	3161.44	16188.8	20499.8				596	1572448	245096	1263936	1596896		31449	4901.92	25278.7	31937.9				596	2107904	341392	1799232	2232384		42158.1	6827.84	35984.6	44647.7				596	2833536	436488	2206208	2832832		56670.7	8729.76	44124.2	56656.6
	597	985888	165196	814608	1057312		19717.8	3303.92	16292.2	21146.2				597	1553504	248240	1283872	1665184		31070.1	4964.8	25677.4	33303.7				597	2140672	326904	1773984	2289280		42813.4	6538.08	35479.7	45785.6				597	2710912	448944	2270976	2901888		54218.2	8978.88	45419.5	58037.8
	598	1019200	152668	814192	1071232		20384	3053.36	16283.8	21424.6				598	1575328	235216	1260096	1660448		31506.6	4704.32	25201.9	33209				598	2187712	337328	1731072	2283840		43754.2	6746.56	34621.4	45676.8				598	2736640	421904	2216512	2821952		54732.8	8438.08	44330.2	56439
	599	1002912	156456	812800	1065696		20058.2	3129.12	16256	21313.9				599	1635360	247024	1291392	1597472		32707.2	4940.48	25827.8	31949.4				599	2131328	333968	1755168	2271872		42626.6	6679.36	35103.4	45437.4				599	2839808	436392	2227840	2756416		56796.2	8727.84	44556.8	55128.3
	600	994992	158728	832144	1016128		19899.8	3174.56	16642.9	20322.6				600	1538368	241248	1332128	1700736		30767.4	4824.96	26642.6	34014.7				600	2172608	326952	1738496	2266304		43452.2	6539.04	34769.9	45326.1				600	2589056	441744	2233600	2903424		51781.1	8834.88	44672	58068.5
	601	1005664	156708	815584	1001664		20113.3	3134.16	16311.7	20033.3				601	1593440	240588	1227072	1646912		31868.8	4811.76	24541.4	32938.2				601	2105344	341592	1720128	2234624		42106.9	6831.84	34402.6	44692.5				601	2745472	425984	2233792	2907264		54909.4	8519.68	44675.8	58145.3
	602	989840	158576	790624	1020928		19796.8	3171.52	15812.5	20418.6				602	1609664	255284	1300160	1616608		32193.3	5105.68	26003.2	32332.2				602	2159296	327408	1794688	2212544		43185.9	6548.16	35893.8	44250.9				602	2880704	447000	2245376	2876480		57614.1	8940	44907.5	57529.6
	603	1006768	156760	824016	1059552		20135.4	3135.2	16480.3	21191				603	1529088	231976	1319744	1632096		30581.8	4639.52	26394.9	32641.9				603	2170944	336864	1683104	2270912		43418.9	6737.28	33662.1	45418.2				603	2695616	412320	2274432	2864256		53912.3	8246.4	45488.6	57285.1
	604	1030512	158376	841104	1049952		20610.2	3167.52	16822.1	20999				604	1565216	237800	1270496	1583232		31304.3	4756	25409.9	31664.6				604	2193088	337832	1746240	2194880		43861.8	6756.64	34924.8	43897.6				604	2769920	430264	2212736	2900160		55398.4	8605.28	44254.7	58003.2
	605	1025776	159992	834416	1061152		20515.5	3199.84	16688.3	21223				605	1528768	247124	1254368	1638976		30575.4	4942.48	25087.4	32779.5				605	2188992	337328	1795296	2257856		43779.8	6746.56	35905.9	45157.1				605	2828416	441184	2301120	2850624		56568.3	8823.68	46022.4	57012.5
	606	984432	154436	815072	1048080		19688.6	3088.72	16301.4	20961.6				606	1629824	243324	1306144	1695200		32596.5	4866.48	26122.9	33904				606	2199872	319488	1707904	2239360		43997.4	6389.76	34158.1	44787.2				606	2656192	421848	2364736	2912064		53123.8	8436.96	47294.7	58241.3
	607	1009360	151204	800752	1035312		20187.2	3024.08	16015	20706.2				607	1627040	242260	1265248	1575040		32540.8	4845.2	25305	31500.8				607	2135104	335344	1729088	2150592		42702.1	6706.88	34581.8	43011.8				607	2776192	426592	2153984	2802752		55523.8	8531.84	43079.7	56055
	608	1009200	153072	835200	1049440		20184	3061.44	16704	20988.8				608	1557056	252952	1297216	1600288		31141.1	5059.04	25944.3	32005.8				608	2112768	330616	1771520	2284352		42255.4	6612.32	35430.4	45687				608	2754816	437056	2205888	2810880		55096.3	8741.12	44117.8	56217.6
	609	1022176	156708	821024	1047552		20443.5	3134.16	16420.5	20951				609	1542400	245148	1259776	1642208		30848	4902.96	25195.5	32844.2				609	2230400	322224	1672416	2258048		44608	6444.48	33448.3	45161				609	2742592	420064	2227648	2922688		54851.8	8401.28	44553	58453.8
	610	1033696	155244	829664	1044800		20673.9	3104.88	16593.3	20896				610	1617792	241752	1282336	1593216		32355.8	4835.04	25646.7	31864.3				610	2220416	343120	1750304	2245824		44408.3	6862.4	35006.1	44916.5				610	2800512	434504	2195200	2858112		56010.2	8690.08	43904	57162.2
	611	1012496	160548	824800	1045104		20249.9	3210.96	16496	20902.1				611	1585632	242312	1315008	1643328		31712.6	4846.24	26300.2	32866.6				611	2106048	334832	1753920	2253888		42121	6696.64	35078.4	45077.8				611	2726528	440424	2323968	2849536		54530.6	8808.48	46479.4	56990.7
	612	1013056	155696	814304	1033952		20261.1	3113.92	16286.1	20679				612	1534112	234712	1246432	1659168		30682.2	4694.24	24928.6	33183.4				612	2126784	329544	1732416	2252096		42535.7	6590.88	34648.3	45041.9				612	2679488	427968	2243840	2873856		53589.8	8559.36	44876.8	57477.1
	613	992496	161456	843888	1058336		19849.9	3229.12	16877.8	21166.7				613	1572032	242412	1264832	1625888		31440.6	4848.24	25296.6	32517.8				613	2204608	339712	1753024	2224128		44092.2	6794.24	35060.5	44482.6				613	2717888	429144	2171712	2768000		54357.8	8582.88	43434.2	55360
	614	971696	151000	826352	1044640		19433.9	3020	16527	20892.8				614	1557792	246464	1303264	1579680		31155.8	4929.28	26065.3	31593.6				614	2088896	324872	1798112	2253824		41777.9	6497.44	35962.2	45076.5				614	2843904	446240	2312768	2857984		56878.1	8924.8	46255.4	57159.7
	615	1043856	150800	811504	1050272		20877.1	3016	16230.1	21005.4				615	1566400	235624	1286592	1661344		31328	4712.48	25731.8	33226.9				615	2199744	335136	1690880	2236352		43994.9	6702.72	33817.6	44727				615	2744832	428224	2223360	2898368		54896.6	8564.48	44467.2	57967.4
	616	1012288	155344	815072	1061440		20245.8	3106.88	16301.4	21228.8				616	1585088	251888	1240768	1613952		31701.8	5037.76	24815.4	32279				616	2178944	327816	1753568	2193920		43578.9	6556.32	35071.4	43878.4				616	2728064	435576	2129600	2801152		54561.3	8711.52	42592	56023
	617	995104	159688	823552	1041152		19902.1	3193.76	16471	20823				617	1590080	243780	1321472	1651488		31801.6	4875.6	26429.4	33029.8				617	2132544	333968	1711776	2347520		42650.9	6679.36	34235.5	46950.4				617	2722624	427408	2271168	2895936		54452.5	8548.16	45423.4	57918.7
	618	1029056	155596	827488	1018896		20581.1	3111.92	16549.8	20377.9				618	1561664	251836	1239872	1615072		31233.3	5036.72	24797.4	32301.4				618	2155264	339208	1690176	2190464		43105.3	6784.16	33803.5	43809.3				618	2677760	411504	2171008	2854976		53555.2	8230.08	43420.2	57099.5
	619	997136	162364	820448	1052960		19942.7	3247.28	16409	21059.2				619	1594464	239472	1251648	1617568		31889.3	4789.44	25033	32351.4				619	2179584	347848	1789344	2173312		43591.7	6956.96	35786.9	43466.2				619	2858816	434552	2192320	2752704		57176.3	8691.04	43846.4	55054.1
	620	998528	155748	816464	1063616		19970.6	3114.96	16329.3	21272.3				620	1563648	231468	1321568	1660288		31273	4629.36	26431.4	33205.8				620	2066688	346176	1770720	2236480		41333.8	6923.52	35414.4	44729.6				620	2780736	419912	2273152	2899520		55614.7	8398.24	45463	57990.4
	621	1007328	159384	800704	1045168		20146.6	3187.68	16014.1	20903.4				621	1577344	239776	1234432	1670720		31546.9	4795.52	24688.6	33414.4				621	2174464	330000	1721408	2179200		43489.3	6600	34428.2	43584				621	2743424	428280	2220032	2910336		54868.5	8565.6	44400.6	58206.7
	622	997488	160192	818800	1063264		19949.8	3203.84	16376	21265.3				622	1578656	249100	1231904	1643392		31573.1	4982	24638.1	32867.8				622	2163712	348712	1703616	2202624		43274.2	6974.24	34072.3	44052.5				622	2868224	434600	2238976	2826880		57364.5	8692	44779.5	56537.6
	623	979232	156356	807568	1006240		19584.6	3127.12	16151.4	20124.8				623	1550848	255080	1289280	1664320		31017	5101.6	25785.6	33286.4				623	2093376	342968	1718720	2274368		41867.5	6859.36	34374.4	45487.4				623	2733248	426184	2306944	2918912		54665	8523.68	46138.9	58378.2
	624	1020720	154588	811408	1041664		20414.4	3091.76	16228.2	20833.3				624	1639232	242968	1251328	1600992		32784.6	4859.36	25026.6	32019.8				624	2233600	329904	1748800	2193024		44672	6598.08	34976	43860.5				624	2748928	403144	2162816	2899520		54978.6	8062.88	43256.3	57990.4
	625	998896	155900	806704	1064800		19977.9	3118	16134.1	21296				625	1578400	239016	1320256	1642368		31568	4780.32	26405.1	32847.4				625	2211968	341288	1781728	2203456		44239.4	6825.76	35634.6	44069.1				625	2863168	450424	2239744	2755072		57263.4	9008.48	44794.9	55101.4
	626	1020560	158980	817760	1004992		20411.2	3179.6	16355.2	20099.8				626	1457408	234456	1300896	1638080		29148.2	4689.12	26017.9	32761.6				626	2103232	331376	1784000	2270912		42064.6	6627.52	35680	45418.2				626	2723264	439912	2275520	2956224		54465.3	8798.24	45510.4	59124.5
	627	1041152	161000	850880	1028064		20823	3220	17017.6	20561.3				627	1623488	236180	1256384	1661760		32469.8	4723.6	25127.7	33235.2				627	2217408	340072	1757152	2243008		44348.2	6801.44	35143	44860.2				627	2674688	423584	2207488	2931008		53493.8	8471.68	44149.8	58620.2
	628	989680	159080	827440	1050784		19793.6	3181.6	16548.8	21015.7				628	1568320	246008	1263264	1579360		31366.4	4920.16	25265.3	31587.2				628	2178880	341344	1803904	2290880		43577.6	6826.88	36078.1	45817.6				628	2795840	444040	2340288	2819136		55916.8	8880.8	46805.8	56382.7
	629	1009728	155244	782304	1042288		20194.6	3104.88	15646.1	20845.8				629	1584896	255080	1335744	1723264		31697.9	5101.6	26714.9	34465.3				629	2128256	330560	1750880	2254976		42565.1	6611.2	35017.6	45099.5				629	2744192	432816	2214400	2993600		54883.8	8656.32	44288	59872
	630	1023056	156456	785504	1007024		20461.1	3129.12	15710.1	20140.5				630	1540608	247632	1269248	1599552		30812.2	4952.64	25385	31991				630	2202496	338240	1719520	2238912		44049.9	6764.8	34390.4	44778.2				630	2798016	410632	2173184	2743488		55960.3	8212.64	43463.7	54869.8
	631	1000928	158376	806752	1057312		20018.6	3167.52	16135	21146.2				631	1595840	236736	1310880	1603168		31916.8	4734.72	26217.6	32063.4				631	2135104	348208	1800096	2191872		42702.1	6964.16	36001.9	43837.4				631	2914368	430880	2283648	2861696		58287.4	8617.6	45673	57233.9
	632	1023008	154788	811296	1046992		20460.2	3095.76	16225.9	20939.8				632	1531424	250876	1314112	1660864		30628.5	5017.52	26282.2	33217.3				632	2130304	328376	1689280	2226752		42606.1	6567.52	33785.6	44535				632	2665024	428992	2310592	2956224		53300.5	8579.84	46211.8	59124.5
	633	1018224	155544	842336	1048192		20364.5	3110.88	16846.7	20963.8				633	1595936	252800	1280448	1672480		31918.7	5056	25609	33449.6				633	2193344	350496	1761312	2191040		43866.9	7009.92	35226.2	43820.8				633	2745792	417768	2154624	2788736		54915.8	8355.36	43092.5	55774.7
	634	983024	162772	849024	1062528		19660.5	3255.44	16980.5	21250.6				634	1625504	246972	1314304	1570336		32510.1	4939.44	26286.1	31406.7				634	2125248	333616	1820064	2238848		42505	6672.32	36401.3	44777				634	2899200	428536	2232960	2793792		57984	8570.72	44659.2	55875.8
	635	1005712	160092	807632	1044224		20114.2	3201.84	16152.6	20884.5				635	1592320	246668	1271968	1671136		31846.4	4933.36	25439.4	33422.7				635	2197888	329904	1708064	2206336		43957.8	6598.08	34161.3	44126.7				635	2786688	423584	2268736	2974464		55733.8	8471.68	45374.7	59489.3
	636	1027696	161304	805456	1063104		20553.9	3226.08	16109.1	21262.1				636	1558752	243072	1229920	1633664		31175	4861.44	24598.4	32673.3				636	2225856	332600	1720544	2202176		44517.1	6652	34410.9	44043.5				636	2733248	425064	2185152	2692544		54665	8501.28	43703	53850.9
	637	984800	155496	804832	1079936		19696	3109.92	16096.6	21598.7				637	1634560	241400	1292160	1603072		32691.2	4828	25843.2	32061.4				637	2131136	332440	1765312	2241536		42622.7	6648.8	35306.2	44830.7				637	2779008	441392	2285184	2854464		55580.2	8827.84	45703.7	57089.3
	638	1038480	156052	804064	1023264		20769.6	3121.04	16081.3	20465.3				638	1558688	242260	1298272	1655488		31173.8	4845.2	25965.4	33109.8				638	2196224	332848	1649568	2230016		43924.5	6656.96	32991.4	44600.3				638	2825152	426088	2235520	2883776		56503	8521.76	44710.4	57675.5
	639	1004736	160040	836432	1030720		20094.7	3200.8	16728.6	20614.4				639	1626880	244792	1264992	1672160		32537.6	4895.84	25299.8	33443.2				639	2109632	356600	1822752	2207040		42192.6	7132	36455	44140.8				639	2808640	425928	2105472	2806208		56172.8	8518.56	42109.4	56124.2
	640	1013680	160344	823504	1054688		20273.6	3206.88	16470.1	21093.8				640	1561248	249860	1247488	1631680		31225	4997.2	24949.8	32633.6				640	2149312	334632	1768640	2294016		42986.2	6692.64	35372.8	45880.3				640	2772288	445624	2313152	2813696		55445.8	8912.48	46263	56273.9
	641	1031392	154688	810880	987760		20627.8	3093.76	16217.6	19755.2				641	1584128	245200	1279424	1656480		31682.6	4904	25588.5	33129.6				641	2175168	331736	1694144	2217920		43503.4	6634.72	33882.9	44358.4				641	2740416	420624	2198976	2782528		54808.3	8412.48	43979.5	55650.6
	642	1024992	155544	800496	1062976		20499.8	3110.88	16009.9	21259.5				642	1575040	245248	1296064	1613536		31500.8	4904.96	25921.3	32270.7				642	2184256	343016	1773344	2273280		43685.1	6860.32	35466.9	45465.6				642	2753152	441848	2178560	2857664		55063	8836.96	43571.2	57153.3
	643	986976	151052	821584	1029104		19739.5	3021.04	16431.7	20582.1				643	1565504	246312	1289536	1658720		31310.1	4926.24	25790.7	33174.4				643	2183168	327312	1745376	2271488		43663.4	6546.24	34907.5	45429.8				643	2812608	438688	2239808	2878016		56252.2	8773.76	44796.2	57560.3
	644	1035040	157112	813264	1045008		20700.8	3142.24	16265.3	20900.2				644	1583712	240640	1244288	1633216		31674.2	4812.8	24885.8	32664.3				644	2233088	325128	1656128	2228800		44661.8	6502.56	33122.6	44576				644	2674432	414816	2227136	3046976		53488.6	8296.32	44542.7	60939.5
	645	998384	168128	832448	1054240		19967.7	3362.56	16649	21084.8				645	1578784	246568	1294208	1606208		31575.7	4931.36	25884.2	32124.2				645	2208128	346376	1781728	2239552		44162.6	6927.52	35634.6	44791				645	2788544	441288	2165376	2739968		55770.9	8825.76	43307.5	54799.4
	646	1010928	153728	799040	1058496		20218.6	3074.56	15980.8	21169.9				646	1595136	243224	1281536	1634656		31902.7	4864.48	25630.7	32693.1				646	2162240	334376	1753440	2213504		43244.8	6687.52	35068.8	44270.1				646	2699648	415120	2243008	2810880		53993	8302.4	44860.2	56217.6
	647	1024624	157060	817296	1035984		20492.5	3141.2	16345.9	20719.7				647	1561344	247480	1311776	1588448		31226.9	4949.6	26235.5	31769				647	2142848	328984	1687104	2175616		42857	6579.68	33742.1	43512.3				647	2708928	424552	2237888	2818496		54178.6	8491.04	44757.8	56369.9
	648	1011712	159284	834208	1044736		20234.2	3185.68	16684.2	20894.7				648	1611904	240740	1273984	1657440		32238.1	4814.8	25479.7	33148.8				648	2129600	331328	1806944	2171648		42592	6626.56	36138.9	43433				648	2850560	443384	2233280	2765184		57011.2	8867.68	44665.6	55303.7
	649	1013376	152516	839136	1070752		20267.5	3050.32	16782.7	21415				649	1583488	236636	1270144	1623648		31669.8	4732.72	25402.9	32473				649	2171968	323400	1715648	2281216		43439.4	6468	34313	45624.3				649	2756352	437616	2294592	2927424		55127	8752.32	45891.8	58548.5
	650	999008	157616	831360	1031712		19980.2	3152.32	16627.2	20634.2				650	1598336	249456	1300544	1637952		31966.7	4989.12	26010.9	32759				650	2213952	343680	1698304	2293184		44279	6873.6	33966.1	45863.7				650	2702336	422416	2239424	2879616		54046.7	8448.32	44788.5	57592.3
	651	970544	165096	846736	1044592		19410.9	3301.92	16934.7	20891.8				651	1588640	245352	1292384	1677824		31772.8	4907.04	25847.7	33556.5				651	2091968	338648	1737536	2240128		41839.4	6772.96	34750.7	44802.6				651	2752768	432512	2248768	2825024		55055.4	8650.24	44975.4	56500.5
	652	982304	152160	788400	1044064		19646.1	3043.2	15768	20881.3				652	1591744	244488	1273184	1664384		31834.9	4889.76	25463.7	33287.7				652	2150592	325176	1736352	2228160		43011.8	6503.52	34727	44563.2				652	2850112	431440	2233088	2841472		57002.2	8628.8	44661.8	56829.4
	653	1042400	156052	787632	1002176		20848	3121.04	15752.6	20043.5				653	1582080	236840	1307488	1613440		31641.6	4736.8	26149.8	32268.8				653	2177216	336304	1745376	2178304		43544.3	6726.08	34907.5	43566.1				653	2721472	417312	2144064	2868160		54429.4	8346.24	42881.3	57363.2
	654	980272	159740	844832	1074368		19605.4	3194.8	16896.6	21487.4				654	1602304	253512	1271040	1652864		32046.1	5070.24	25420.8	33057.3				654	2089856	337632	1725952	2257984		41797.1	6752.64	34519	45159.7				654	2741952	428224	2230656	2723456		54839	8564.48	44613.1	54469.1
	655	969616	149840	811968	1032496		19392.3	2996.8	16239.4	20649.9				655	1574880	248896	1259264	1627648		31497.6	4977.92	25185.3	32553				655	2125888	336408	1738176	2221056		42517.8	6728.16	34763.5	44421.1				655	2686592	415120	2271808	2942080		53731.8	8302.4	45436.2	58841.6
	656	1047760	158932	831216	1065760		20955.2	3178.64	16624.3	21315.2				656	1566880	259948	1320256	1578880		31337.6	5198.96	26405.1	31577.6				656	2262464	327616	1657824	2143488		45249.3	6552.32	33156.5	42869.8				656	2811520	431848	2208768	2821056		56230.4	8636.96	44175.4	56421.1
	657	993952	160040	798480	1056928		19879	3200.8	15969.6	21138.6				657	1570752	244032	1250176	1573184		31415	4880.64	25003.5	31463.7				657	2152000	330408	1778048	2226240		43040	6608.16	35561	44524.8				657	2728768	414512	2266560	2842304		54575.4	8290.24	45331.2	56846.1
	658	1004256	152464	829808	1067840		20085.1	3049.28	16596.2	21356.8				658	1577696	232684	1278688	1580960		31553.9	4653.68	25573.8	31619.2				658	2082560	307904	1702080	2226304		41651.2	6158.08	34041.6	44526.1				658	2758784	417616	2266688	2852672		55175.7	8352.32	45333.8	57053.4
	659	1032592	158980	807936	1031392		20651.8	3179.6	16158.7	20627.8				659	1587168	254472	1290208	1598816		31743.4	5089.44	25804.2	31976.3				659	2096256	335800	1684000	2152384		41925.1	6716	33680	43047.7				659	2797056	428632	2225024	2891328		55941.1	8572.64	44500.5	57826.6
	660	974336	155444	814240	1077408		19486.7	3108.88	16284.8	21548.2				660	1492640	236888	1231488	1681760		29852.8	4737.76	24629.8	33635.2				660	2086336	324512	1743872	2266560		41726.7	6490.24	34877.4	45331.2				660	2741376	434248	2247936	2835712		54827.5	8684.96	44958.7	56714.2
	661	1037856	153424	799456	1052512		20757.1	3068.48	15989.1	21050.2				661	1614080	249100	1283712	1590400		32281.6	4982	25674.2	31808				661	2215232	319736	1724704	2169664		44304.6	6394.72	34494.1	43393.3				661	2762112	430928	2223168	2903040		55242.2	8618.56	44463.4	58060.8
	662	999680	155900	834672	1029424		19993.6	3118	16693.4	20588.5				662	1556256	243324	1299040	1643456		31125.1	4866.48	25980.8	32869.1				662	2188160	336104	1736416	2198912		43763.2	6722.08	34728.3	43978.2				662	2756416	440472	2220672	2796544		55128.3	8809.44	44413.4	55930.9
	663	1006240	160444	828624	1043280		20124.8	3208.88	16572.5	20865.6				663	1618368	239320	1268256	1589728		32367.4	4786.4	25365.1	31794.6				663	2224704	344496	1789600	2261632		44494.1	6889.92	35792	45232.6				663	2792576	435672	2278400	2783040		55851.5	8713.44	45568	55660.8
	664	1028480	151352	816880	1039328		20569.6	3027.04	16337.6	20786.6				664	1628288	252752	1290368	1615872		32565.8	5055.04	25807.4	32317.4				664	2211904	321312	1756448	2248704		44238.1	6426.24	35129	44974.1				664	2705984	429296	2283840	2858624		54119.7	8585.92	45676.8	57172.5
	665	995680	161256	861456	1036096		19913.6	3225.12	17229.1	20721.9				665	1506240	242616	1295520	1672480		30124.8	4852.32	25910.4	33449.6				665	2223936	343424	1730048	2228736		44478.7	6868.48	34601	44574.7				665	2830976	421800	2245056	2843712		56619.5	8436	44901.1	56874.2
	666	978704	154032	808144	1064352		19574.1	3080.64	16162.9	21287				666	1544320	241448	1262720	1669760		30886.4	4828.96	25254.4	33395.2				666	2146496	322840	1777728	2294592		42929.9	6456.8	35554.6	45891.8				666	2676864	424248	2240128	2841664		53537.3	8484.96	44802.6	56833.3
	667	993168	160040	810368	1040880		19863.4	3200.8	16207.4	20817.6				667	1634560	260760	1274304	1596896		32691.2	5215.2	25486.1	31937.9				667	2125312	333816	1660224	2172800		42506.2	6676.32	33204.5	43456				667	2768320	431544	2275904	2859520		55366.4	8630.88	45518.1	57190.4
	668	999936	158528	833856	1040208		19998.7	3170.56	16677.1	20804.2				668	1548928	244388	1311520	1652064		30978.6	4887.76	26230.4	33041.3				668	2187264	348256	1765600	2183680		43745.3	6965.12	35312	43673.6				668	2699776	437256	2206720	2860224		53995.5	8745.12	44134.4	57204.5
	669	974080	153676	837120	1052192		19481.6	3073.52	16742.4	21043.8				669	1554944	242716	1224352	1592000		31098.9	4854.32	24487	31840				669	2150720	338136	1814304	2293696		43014.4	6762.72	36286.1	45873.9				669	2761856	433176	2278208	2873216		55237.1	8663.52	45564.2	57464.3
	670	1051296	158476	806224	999728		21025.9	3169.52	16124.5	19994.6				670	1602208	258984	1271968	1616352		32044.2	5179.68	25439.4	32327				670	2241792	338544	1702016	2185216		44835.8	6770.88	34040.3	43704.3				670	2739456	433480	2250816	2917056		54789.1	8669.6	45016.3	58341.1
	671	1026496	158932	818384	1062720		20529.9	3178.64	16367.7	21254.4				671	1543264	245148	1326848	1613152		30865.3	4902.96	26537	32263				671	2207808	337728	1832128	2183424		44156.2	6754.56	36642.6	43668.5				671	2803584	433328	2264128	2792832		56071.7	8666.56	45282.6	55856.6
	672	970704	157112	822528	1038480		19414.1	3142.24	16450.6	20769.6				672	1646496	239776	1285344	1686144		32929.9	4795.52	25706.9	33722.9				672	2087968	319944	1728384	2237568		41759.4	6398.88	34567.7	44751.4				672	2756864	437360	2206144	2914432		55137.3	8747.2	44122.9	58288.6
	673	1064960	160396	800032	1022640		21299.2	3207.92	16000.6	20452.8				673	1566496	252344	1280480	1595520		31329.9	5046.88	25609.6	31910.4				673	2231552	338744	1691264	2167040		44631	6774.88	33825.3	43340.8				673	2713536	428736	2205696	2879040		54270.7	8574.72	44113.9	57580.8
	674	1027120	155596	829808	1055104		20542.4	3111.92	16596.2	21102.1				674	1504704	240232	1288480	1630240		30094.1	4804.64	25769.6	32604.8				674	2243200	342560	1767360	2163328		44864	6851.2	35347.2	43266.6				674	2780544	435008	2238656	2757696		55610.9	8700.16	44773.1	55153.9
	675	1000144	161760	825472	1076864		20002.9	3235.2	16509.4	21537.3				675	1601216	239880	1282816	1627648		32024.3	4797.6	25656.3	32553				675	2064768	331936	1703040	2285568		41295.4	6638.72	34060.8	45711.4				675	2779392	434808	2292800	2945408		55587.8	8696.16	45856	58908.2
	676	1016816	166612	806336	1021712		20336.3	3332.24	16126.7	20434.2				676	1584288	248392	1317248	1632960		31685.8	4967.84	26345	32659.2				676	2245696	312928	1638656	2191040		44913.9	6258.56	32773.1	43820.8				676	2748480	438992	2237760	2976704		54969.6	8779.84	44755.2	59534.1
	677	1000000	159080	829456	1050208		20000	3181.6	16589.1	21004.2				677	1531520	239320	1298208	1646688		30630.4	4786.4	25964.2	32933.8				677	2122304	343424	1755488	2223552		42446.1	6868.48	35109.8	44471				677	2726272	440928	2245184	2780416		54525.4	8818.56	44903.7	55608.3
	678	990048	158676	812688	1072320		19801	3173.52	16253.8	21446.4				678	1602208	234508	1273760	1616000		32044.2	4690.16	25475.2	32320				678	2077376	323040	1734016	2188160		41547.5	6460.8	34680.3	43763.2				678	2683968	415528	2332800	2891840		53679.4	8310.56	46656	57836.8
	679	1041408	150140	794400	1057056		20828.2	3002.8	15888	21141.1				679	1591520	257564	1296096	1627360		31830.4	5151.28	25921.9	32547.2				679	2167296	338088	1699360	2192384		43345.9	6761.76	33987.2	43847.7				679	2740288	439552	2224704	2844480		54805.8	8791.04	44494.1	56889.6
	680	1018272	159184	826656	1041664		20365.4	3183.68	16533.1	20833.3				680	1528672	236028	1273440	1679040		30573.4	4720.56	25468.8	33580.8				680	2180416	345304	1784160	2302016		43608.3	6906.08	35683.2	46040.3				680	2723328	430576	2189184	2793856		54466.6	8611.52	43783.7	55877.1
	681	1017072	152312	803232	1052960		20341.4	3046.24	16064.6	21059.2				681	1627168	252548	1237728	1654464		32543.4	5050.96	24754.6	33089.3				681	2097216	327360	1693184	2241280		41944.3	6547.2	33863.7	44825.6				681	2770752	437408	2234944	2871424		55415	8748.16	44698.9	57428.5
	682	1004112	161152	822368	1019200		20082.2	3223.04	16447.4	20384				682	1539904	249100	1283968	1636096		30798.1	4982	25679.4	32721.9				682	2185728	340424	1714624	2144896		43714.6	6808.48	34292.5	42897.9				682	2738176	423280	2161088	2862976		54763.5	8465.6	43221.8	57259.5
	683	1021920	159992	837008	1088832		20438.4	3199.84	16740.2	21776.6				683	1537888	246920	1263680	1620832		30757.8	4938.4	25273.6	32416.6				683	2117696	340016	1704576	2259200		42353.9	6800.32	34091.5	45184				683	2675904	420624	2238784	2795712		53518.1	8412.48	44775.7	55914.2
	684	1017280	153980	817088	1015568		20345.6	3079.6	16341.8	20311.4				684	1604224	238764	1261984	1561728		32084.5	4775.28	25239.7	31234.6				684	2192576	332544	1712608	2259712		43851.5	6650.88	34252.2	45194.2				684	2696384	427000	2209216	2910336		53927.7	8540	44184.3	58206.7
	685	1019840	150596	847408	1024832		20396.8	3011.92	16948.2	20496.6				685	1553344	239220	1290592	1600608		31066.9	4784.4	25811.8	32012.2				685	2221760	340120	1729504	2177984		44435.2	6802.4	34590.1	43559.7				685	2769216	418336	2249024	2802112		55384.3	8366.72	44980.5	56042.2
	686	990576	150292	807632	1049056		19811.5	3005.84	16152.6	20981.1				686	1555200	250216	1271296	1670816		31104	5004.32	25425.9	33416.3				686	2174912	331832	1757152	2253568		43498.2	6636.64	35143	45071.4				686	2676672	428024	2205696	2864896		53533.4	8560.48	44113.9	57297.9
	687	1005040	155496	791808	1058880		20100.8	3109.92	15836.2	21177.6				687	1615616	255388	1249184	1617248		32312.3	5107.76	24983.7	32345				687	2177728	336616	1735872	2222720		43554.6	6732.32	34717.4	44454.4				687	2805184	409408	2171456	2770880		56103.7	8188.16	43429.1	55417.6
	688	1033168	161660	821072	1001504		20663.4	3233.2	16421.4	20030.1				688	1514240	249204	1323264	1649984		30284.8	4984.08	26465.3	32999.7				688	2210752	342152	1729952	2109568		44215	6843.04	34599	42191.4				688	2809216	425520	2195776	2892800		56184.3	8510.4	43915.5	57856
	689	1009888	157212	825056	1066528		20197.8	3144.24	16501.1	21330.6				689	1578016	236736	1244352	1652448		31560.3	4734.72	24887	33049				689	2108608	332088	1732992	2263680		42172.2	6641.76	34659.8	45273.6				689	2737344	433688	2276096	2868608		54746.9	8673.76	45521.9	57372.2
	690	1032448	157668	824336	1028688		20649	3153.36	16486.7	20573.8				690	1601312	253816	1267840	1664384		32026.2	5076.32	25356.8	33287.7				690	2129856	331576	1729504	2213760		42597.1	6631.52	34590.1	44275.2				690	2768320	431592	2217536	2686656		55366.4	8631.84	44350.7	53733.1
	691	1027600	168024	835616	1061888		20552	3360.48	16712.3	21237.8				691	1571776	248288	1342400	1679360		31435.5	4965.76	26848	33587.2				691	2158208	331424	1794848	2179840		43164.2	6628.48	35897	43596.8				691	2744256	441696	2220928	2844928		54885.1	8833.92	44418.6	56898.6
	692	1002544	156052	847264	1080800		20050.9	3121.04	16945.3	21616				692	1645408	241956	1231328	1647296		32908.2	4839.12	24626.6	32945.9				692	2157760	335648	1811296	2357376		43155.2	6712.96	36225.9	47147.5				692	2752448	429040	2178816	2849280		55049	8580.8	43576.3	56985.6
	693	1031760	165700	826032	1065600		20635.2	3314	16520.6	21312				693	1614016	245756	1246656	1589344		32280.3	4915.12	24933.1	31786.9				693	2217792	327360	1734208	2155072		44355.8	6547.2	34684.2	43101.4				693	2834880	415120	2171264	2867456		56697.6	8302.4	43425.3	57349.1
	694	1031456	151756	813936	1049728		20629.1	3035.12	16278.7	20994.6				694	1531968	243476	1326048	1723200		30639.4	4869.52	26521	34464				694	2153728	338952	1763936	2247680		43074.6	6779.04	35278.7	44953.6				694	2769216	447664	2200320	2773376		55384.3	8953.28	44006.4	55467.5
	695	976112	152416	804672	1043072		19522.2	3048.32	16093.4	20861.4				695	1564416	231620	1232000	1645312		31288.3	4632.4	24640	32906.2				695	2129344	327360	1758944	2254144		42586.9	6547.2	35178.9	45082.9				695	2777600	417264	2229824	2813824		55552	8345.28	44596.5	56276.5
	696	997904	150948	788496	1025200		19958.1	3018.96	15769.9	20504				696	1557856	266336	1283712	1597760		31157.1	5326.72	25674.2	31955.2				696	2195072	327872	1703104	2227520		43901.4	6557.44	34062.1	44550.4				696	2763712	441592	2258048	2782720		55274.2	8831.84	45161	55654.4
	697	1012432	153828	841712	1024160		20248.6	3076.56	16834.2	20483.2				697	1563648	238104	1328800	1666688		31273	4762.08	26576	33333.8				697	2202368	348256	1728192	2224960		44047.4	6965.12	34563.8	44499.2				697	2766336	437304	2306432	2886912		55326.7	8746.08	46128.6	57738.2
	698	981824	154840	812432	1046416		19636.5	3096.8	16248.6	20928.3				698	1587744	250672	1252480	1694976		31754.9	5013.44	25049.6	33899.5				698	2063648	329952	1692896	2236864		41273	6599.04	33857.9	44737.3				698	2812800	423024	2265280	2813952		56256	8460.48	45305.6	56279
	699	1026768	158376	813936	1014304		20535.4	3167.52	16278.7	20286.1				699	1551360	243832	1280288	1626688		31027.2	4876.64	25605.8	32533.8				699	2201664	324360	1720480	2218112		44033.3	6487.2	34409.6	44362.2				699	2796800	439704	2230016	2833344		55936	8794.08	44600.3	56666.9
	700	984336	164840	827696	1011920		19686.7	3296.8	16553.9	20238.4				700	1575648	242008	1253760	1641536		31513	4840.16	25075.2	32830.7				700	2152256	338592	1760192	2191616		43045.1	6771.84	35203.8	43832.3				700	2753600	417208	2221184	2742848		55072	8344.16	44423.7	54857
							20259.2	3148.04	16444	20940										31759.8	4930.51	25728.9	32794.4										43334.7	6714.38	35040.2	44653.4										55546.8	8640.82	44932.4	57257.7
							426.219	88.1548	358.437	434.264										666.819	125.943	548.215	701.859										932.125	168.106	743.369	972.183										1166.21	213.676	977.851	1198.68
							142.335	56.1074	128.234	144.707										178.213	70.2176	160.402	181.092										208.17	81.9413	187.19	211.314										235.684	92.956	211.973	239.286
							181662	7771.27	128477	188585										444648	15861.7	300540	492607										868857	28259.8	552597	945141										1.36004e+06	45657.3	956192	1.43683e+06
							20259.2	3148.04	16444	20940										31759.8	4930.51	25728.9	32794.4										43334.7	6714.38	35040.2	44653.4										55546.8	8640.82	44932.4	57257.7
							161403	4623.23	112033	167645										412888	10931.2	274811	459812										825522	21545.4	517557	900487										1.3045e+06	37016.5	911259	1.37957e+06
							Xe129(LR)	Xe130(LR)	Xe131(LR)	Xe132(LR)										Xe129(LR)	Xe130(LR)	Xe131(LR)	Xe132(LR)										Xe129(LR)	Xe130(LR)	Xe131(LR)	Xe132(LR)										Xe129(LR)	Xe130(LR)	Xe131(LR)	Xe132(LR)
	GE on
	40 ml Ne	Ne21(LR)	Ne22(LR)		Ne21(LR)	Ne22(LR)									60 ml Ne	Ne21(LR)	Ne22(LR)		Ne21(LR)	Ne22(LR)									80 ml Ne	Ne21(LR)	Ne22(LR)		Ne21(LR)	Ne22(LR)									100 ml Ne	Ne21(LR)	Ne22(LR)		Ne21(LR)	Ne22(LR)
	/ min														/ min														/ min														/ min
	Sweeps	Intensities, cps			Counts										Sweeps	Intensities, cps			Counts										Sweeps	Intensities, cps			Counts										Sweeps	Intensities, cps			Counts
	1	31273	956496		625.46	19129.9									1	41167	1547040		823.34	30940.8									1	60056	2078688		1201.12	41573.8									1	83002	2665536		1660.04	53310.7
	2	30668	1005776		613.36	20115.5									2	44904	1584224		898.08	31684.5									2	59753	2047136		1195.06	40942.7									2	75116	2642112		1502.32	52842.2
	3	29053	980080		581.06	19601.6									3	46823	1530016		936.46	30600.3									3	64098	2110144		1281.96	42202.9									3	78856	2629376		1577.12	52587.5
	4	27842	976112		556.84	19522.2									4	38542	1501792		770.84	30035.8									4	53994	2081952		1079.88	41639									4	75622	2655360		1512.44	53107.2
	5	29759	977056		595.18	19541.1									5	41571	1506688		831.42	30133.8									5	60966	2097152		1219.32	41943									5	77036	2646080		1540.72	52921.6
	6	22190	990208		443.8	19804.2									6	44702	1513408		894.04	30268.2									6	59955	2085952		1199.1	41719									6	76530	2671680		1530.6	53433.6
	7	29457	1002224		589.14	20044.5									7	43086	1512320		861.72	30246.4									7	59450	2033920		1189	40678.4									7	75216	2637312		1504.32	52746.2
	8	30668	974032		613.36	19480.6									8	43086	1512864		861.72	30257.3									8	60258	2040288		1205.16	40805.8									8	73902	2633920		1478.04	52678.4
	9	25823	960240		516.46	19204.8									9	43187	1521152		863.74	30423									9	57530	2064800		1150.6	41296									9	80778	2609600		1615.56	52192
	10	29961	978928		599.22	19578.6									10	41773	1516480		835.46	30329.6									10	60460	2063840		1209.2	41276.8									10	77846	2655488		1556.92	53109.8
	11	26025	970576		520.5	19411.5									11	44500	1515104		890	30302.1									11	59046	2101056		1180.92	42021.1									11	77846	2634688		1556.92	52693.8
	12	27539	970160		550.78	19403.2									12	51772	1539360		1035.44	30787.2									12	60764	2071200		1215.28	41424									12	73600	2617024		1472	52340.5
	13	32485	949504		649.7	18990.1									13	45611	1569536		912.22	31390.7									13	62279	2107200		1245.58	42144									13	78756	2665152		1575.12	53303
	14	28952	997632		579.04	19952.6									14	47732	1539264		954.64	30785.3									14	61673	2099520		1233.46	41990.4									14	78452	2655936		1569.04	53118.7
	15	30163	995856		603.26	19917.1									15	40864	1523712		817.28	30474.2									15	59248	2052768		1184.96	41055.4									15	79160	2640128		1583.2	52802.6
	16	31980	976848		639.6	19537									16	42783	1538944		855.66	30778.9									16	58035	2054176		1160.7	41083.5									16	84620	2591232		1692.4	51824.6
	17	30870	965568		617.4	19311.4									17	37532	1553440		750.64	31068.8									17	61168	2095392		1223.36	41907.8									17	79564	2603968		1591.28	52079.4
	18	30264	957216		605.28	19144.3									18	40360	1526592		807.2	30531.8									18	62279	2066976		1245.58	41339.5									18	71476	2669568		1429.52	53391.4
	19	28346	963168		566.92	19263.4									19	44096	1523392		881.92	30467.8									19	58642	2056896		1172.84	41137.9									19	76834	2659904		1536.68	53198.1
	20	28447	948048		568.94	18961									20	45106	1535104		902.12	30702.1									20	56924	2062080		1138.48	41241.6									20	76632	2629504		1532.64	52590.1
	21	30163	966512		603.26	19330.2									21	47227	1499040		944.54	29980.8									21	59652	2079328		1193.04	41586.6									21	74408	2607360		1488.16	52147.2
	22	28245	964528		564.9	19290.6									22	40561	1489792		811.22	29795.8									22	61976	2115584		1239.52	42311.7									22	77946	2619840		1558.92	52396.8
	23	23401	966096		468.02	19321.9									23	43288	1566656		865.76	31333.1									23	64199	2080320		1283.98	41606.4									23	77036	2652864		1540.72	53057.3
	24	31172	993760		623.44	19875.2									24	42783	1515328		855.66	30306.6									24	59046	2040096		1180.92	40801.9									24	81486	2699712		1629.72	53994.2
	25	27438	955760		548.76	19115.2									25	41975	1501280		839.5	30025.6									25	55409	2069024		1108.18	41380.5									25	78048	2631232		1560.96	52624.6
	26	30163	1003376		603.26	20067.5									26	44500	1515328		890	30306.6									26	58642	2092256		1172.84	41845.1									26	71376	2657920		1427.52	53158.4
	27	26731	965360		534.62	19307.2									27	46621	1540960		932.42	30819.2									27	60562	2090080		1211.24	41801.6									27	74004	2622528		1480.08	52450.6
	28	30870	960768		617.4	19215.4									28	47126	1517024		942.52	30340.5									28	57126	2056672		1142.52	41133.4									28	79868	2655296		1597.36	53105.9
	29	28548	950032		570.96	19000.6									29	38239	1534464		764.78	30689.3									29	66624	2131584		1332.48	42631.7									29	80070	2654080		1601.4	53081.6
	30	27034	960976		540.68	19219.5									30	45712	1535424		914.24	30708.5									30	58844	2093440		1176.88	41868.8									30	75722	2655616		1514.44	53112.3
	31	30163	998880		603.26	19977.6									31	38643	1522240		772.86	30444.8									31	67332	2069696		1346.64	41393.9									31	78756	2671744		1575.12	53434.9
	32	27842	951072		556.84	19021.4									32	45409	1526176		908.18	30523.5									32	59854	2062208		1197.08	41244.2									32	77440	2632704		1548.8	52654.1
	33	26631	963280		532.62	19265.6									33	47631	1501600		952.62	30032									33	63088	2062848		1261.76	41257									33	74914	2638336		1498.28	52766.7
	34	24511	983632		490.22	19672.6									34	47732	1536800		954.64	30736									34	64199	2071648		1283.98	41433									34	71780	2680640		1435.6	53612.8
	35	28851	980912		577.02	19618.2									35	42783	1507136		855.66	30142.7									35	60056	2075968		1201.12	41519.4									35	80778	2670464		1615.56	53409.3
	36	28144	970480		562.88	19409.6									36	46419	1515424		928.38	30308.5									36	59450	2053184		1189	41063.7									36	79766	2683712		1595.32	53674.2
	37	27842	966400		556.84	19328									37	39451	1595552		789.02	31911									37	60966	2072512		1219.32	41450.2									37	78148	2618880		1562.96	52377.6
	38	30062	961920		601.24	19238.4									38	49651	1514784		993.02	30295.7									38	60258	2072288		1205.16	41445.8									38	76430	2664704		1528.6	53294.1
	39	26933	962864		538.66	19257.3									39	47126	1526272		942.52	30525.4									39	60764	2051136		1215.28	41022.7									39	78350	2601216		1567	52024.3
	40	25924	943760		518.48	18875.2									40	41167	1516288		823.34	30325.8									40	62583	2109952		1251.66	42199									40	74306	2680384		1486.12	53607.7
	41	27842	987072		556.84	19741.4									41	41268	1532768		825.36	30655.4									41	54903	2089760		1098.06	41795.2									41	81384	2652480		1627.68	53049.6
	42	26429	988960		528.58	19779.2									42	48944	1531264		978.88	30625.3									42	64300	2106688		1286	42133.8									42	72790	2610368		1455.8	52207.4
	43	28346	989056		566.92	19781.1									43	42480	1494688		849.6	29893.8									43	63492	2065984		1269.84	41319.7									43	73396	2598848		1467.92	51977
	44	29658	978304		593.16	19566.1									44	44298	1509792		885.96	30195.8									44	59248	2098560		1184.96	41971.2									44	78048	2624192		1560.96	52483.8
	45	30870	962864		617.4	19257.3									45	40864	1509472		817.28	30189.4									45	60562	2086496		1211.24	41729.9									45	80576	2657728		1611.52	53154.6
	46	25722	953776		514.44	19075.5									46	46419	1525952		928.38	30519									46	62886	2117888		1257.72	42357.8									46	74610	2635456		1492.2	52709.1
	47	26832	988224		536.64	19764.5									47	41470	1518176		829.4	30363.5									47	61067	2011808		1221.34	40236.2									47	79464	2679168		1589.28	53583.4
[truncated: 2,571 more rows]
